# Supplementary material for: Human embryoid bodies as a novel system for genomic studies of functionally diverse cell types
Source: eLife. 2022 Feb 10;11:e71361. doi: 10.7554/eLife.71361 (PMC8830892; doi:10.7554/eLife.71361)
Supplement: Supplementary file 1. [file elife-71361-supp1.xlsx]

## Sheet: Frequency.MostCommonAnnotation.
Cell Type Annotation	Frequency in EB cells
Acinar cells	52
Adrenocortical cells	7
AFP_ALB positive cells	36
Amacrine cells	79
Antigen presenting cells	1
Astrocytes	39
Bipolar cells	40
Cardiomyocytes	521
CCL19_CCL21 positive cells	2
Chromaffin cells	24
Ciliated epithelial cells	314
CLC_IL5RA positive cells	3
Corneal and conjunctival epithelial cells	21
Ductal cells	329
ELF3_AGBL2 positive cells	23
Endocardial cells	5
ENS glia	30
ENS neurons	72
Epicardial fat cells	112
Erythroblasts	34
Excitatory neurons	1
Ganglion cells	61
Goblet cells	271
Granule neurons	158
Hematopoietic stem cells	9
Hepatoblasts	212
Horizontal cells	53
IGFBP1_DKK1 positive cells	341
Inhibitory interneurons	9
Inhibitory neurons	65
Intestinal epithelial cells	501
Islet endocrine cells	552
Lens fibre cells	51
Limbic system neurons	15
Lymphatic endothelial cells	2
Megakaryocytes	37
Mesangial cells	222
Mesothelial cells	160
Metanephric cells	142
Microglia	44
MUC13_DMBT1 positive cells	181
Myeloid cells	1
Neuroendocrine cells	4
Oligodendrocytes	53
Parietal and chief cells	14
PDE11A_FAM19A2 positive cells	35
Photoreceptor cells	9
Purkinje neurons	35
Retinal pigment cells	391
Retinal progenitors and Muller glia	21
scHCL.hESC	34086
Schwann cells	38
Skeletal muscle cells	5
SKOR2_NPSR1 positive cells	39
SLC24A4_PEX5L positive cells	297
Smooth muscle cells	60
Squamous epithelial cells	160
Stellate cells	247
Stromal cells	217
Syncytiotrophoblasts and villous cytotrophoblasts	17
Thymic epithelial cells	116
Thymocytes	1
Trophoblast giant cells	5
uncertain	1566
Unipolar brush cells	37
Ureteric bud cells	26
Vascular endothelial cells	58
Visceral neurons	119
