# Supplementary material for: Human embryoid bodies as a novel system for genomic studies of functionally diverse cell types
Source: eLife. 2022 Feb 10;11:e71361. doi: 10.7554/eLife.71361 (PMC8830892; doi:10.7554/eLife.71361)
Supplement: Supplementary file 2. [file elife-71361-supp2.csv]

Cell Type Annotation	Frequency in EBs
Acinar cells	8
Adrenocortical cells	10
AFP_ALB positive cells	9
Amacrine cells	13
Astrocytes	71
Bipolar cells	35
Bronchiolar and alveolar epithelial cells	9
Cardiomyocytes	89
Chromaffin cells	35
Ciliated epithelial cells	70
CLC_IL5RA positive cells	1
Ductal cells	5
ELF3_AGBL2 positive cells	3
Endocardial cells	11
ENS glia	177
ENS neurons	22
Epicardial fat cells	3
Erythroblasts	19
Excitatory neurons	33
Extravillous trophoblasts	8
Ganglion cells	106
Granule neurons	775
Hematopoietic stem cells	1
Hepatoblasts	398
Horizontal cells	53
IGFBP1_DKK1 positive cells	17
Inhibitory interneurons	11
Inhibitory neurons	86
Intestinal epithelial cells	6
Islet endocrine cells	44
Lens fibre cells	15
Limbic system neurons	70
Lymphatic endothelial cells	9
Lymphoid cells	1
Megakaryocytes	14
Mesangial cells	101
Mesothelial cells	1
Metanephric cells	58
Microglia	46
MUC13_DMBT1 positive cells	2
Myeloid cells	2
Neuroendocrine cells	10
Oligodendrocytes	44
PAEP_MECOM positive cells	7
Parietal and chief cells	2
PDE11A_FAM19A2 positive cells	49
Photoreceptor cells	21
Purkinje neurons	25
Retinal pigment cells	90
Retinal progenitors and Muller glia	77
scHCL.hESC	21724
Schwann cells	70
Skeletal muscle cells	12
SKOR2_NPSR1 positive cells	29
SLC24A4_PEX5L positive cells	37
Smooth muscle cells	3
Squamous epithelial cells	32
Stellate cells	32
Stromal cells	448
Sympathoblasts	11
Thymic epithelial cells	5
Thymocytes	4
Trophoblast giant cells	8
uncertain	873
Unipolar brush cells	38
Ureteric bud cells	13
Vascular endothelial cells	59
Visceral neurons	46
