# Supplementary material for: Human embryoid bodies as a novel system for genomic studies of functionally diverse cell types
Source: eLife. 2022 Feb 10;11:e71361. doi: 10.7554/eLife.71361 (PMC8830892; doi:10.7554/eLife.71361)
Supplement: Supplementary file 3. [file elife-71361-supp3.xlsx]

## Sheet: Sheet1
	0	1	2	3	4	5	6
18511_Rep1	99	2918	423	139	277	278	37
18511_Rep2	136	1958	35148	35	212	193	17
18511_Rep3	1508	2514	372	128	272	250	35
18858_Rep1	5995	526	29	28	116	35	3
18858_Rep2	4005	703	4	3	24	9	0
18858_Rep3	4882	235	5	9	47	12	0
19160_Rep1	81	2870	997	1129	196	634	63
19160_Rep2	179	1025	361	383	221	207	42
19160_Rep3	808	1634	747	819	1003	372	98
