# Supplementary material for: Human embryoid bodies as a novel system for genomic studies of functionally diverse cell types
Source: eLife. 2022 Feb 10;11:e71361. doi: 10.7554/eLife.71361 (PMC8830892; doi:10.7554/eLife.71361)
Supplement: Supplementary file 4. [file elife-71361-supp4.csv]

	gene	Cluster0.logFC	Cluster0.AveExpr	Cluster0.t	Cluster0.P.Value	Cluster0.adj.P.Val	Cluster0.B	Cluster1.logFC	Cluster1.AveExpr	Cluster1.t	Cluster1.P.Value	Cluster1.adj.P.Val	Cluster1.B	Cluster2.logFC	Cluster2.AveExpr	Cluster2.t	Cluster2.P.Value	Cluster2.adj.P.Val	Cluster2.B	Cluster3.logFC	Cluster3.AveExpr	Cluster3.t	Cluster3.P.Value	Cluster3.adj.P.Val	Cluster3.B	Cluster4.logFC	Cluster4.AveExpr	Cluster4.t	Cluster4.P.Value	Cluster4.adj.P.Val	Cluster4.B	Cluster5.logFC	Cluster5.AveExpr	Cluster5.t	Cluster5.P.Value	Cluster5.adj.P.Val	Cluster5.B	Cluster6.logFC	Cluster6.AveExpr	Cluster6.t	Cluster6.P.Value	Cluster6.adj.P.Val	Cluster6.B
1	TTC3	-27.5779899912562	7.21392643181842	-33.0344145545024	7.5029359149956e-38	7.64174022942302e-34	71.5832300789923	4.3080349060512	7.21392643181842	7.72643992929792	2.50196338233784e-10	2.01442664419849e-09	13.223537665103	2.3391166975863	7.21392643181842	3.6495477989959	0.00058732595780044	0.00190126181770893	-1.00852159130372	6.89855724566929	7.21392643181842	10.6708381015015	5.46226446530026e-15	5.24841165840407e-13	23.8895392473171	5.82717708348383	7.21392643181842	9.30566806034605	7.16673281309893e-13	1.23717243561716e-11	19.0712266883375	8.3871442884111	7.21392643181842	13.3867846608279	6.55683578989673e-19	1.96415801529701e-17	32.7754737303799	-0.182040229945557	7.21392643181842	-0.157666217626782	0.87529967632519	0.918401895886686	-6.43368186367371
2	ASXL1	-12.6005988970133	5.42363420753636	-26.3907634657039	8.0111832274433e-33	4.0796950585755e-29	60.7350879836628	1.18266550308337	5.42363420753636	3.16977232805309	0.00249756440879542	0.00480500443966402	-2.19907796965728	2.78874852165785	5.42363420753636	6.66256821571417	1.3696185237103e-08	1.20047888674608e-07	9.50381810518043	6.09503541672672	5.42363420753636	13.6771608498346	2.64087714243943e-19	7.26954964749882e-17	33.2919251901595	0.616789119041147	5.42363420753636	1.39800692284199	0.167747361979681	0.224642999342783	-5.71631510593493	-2.17388393521383	5.42363420753636	-4.31291580787771	6.77682430477876e-05	0.000164785505343083	1.40908951922509	4.09124427171805	5.42363420753636	5.6604234440514	5.71624785369721e-07	5.55701437304033e-06	5.99466544512521
3	BCL7C	-12.415041798633	6.10759063198303	-25.5594803477715	4.0626249458907e-32	1.19406318026123e-28	60.4640020035092	1.9202547948521	6.10759063198303	5.06971169875139	4.86874476629162e-06	1.55790654868615e-05	3.63933584895843	4.08074497043123	6.10759063198303	9.64036977366471	2.12789025504416e-13	4.15183184820397e-12	20.297967570003	1.71112324842437	6.10759063198303	3.58263249267804	0.00072326796355224	0.00236180962128232	-0.977745985147778	4.23122093914237	6.10759063198303	9.87357113005634	9.19347695211153e-14	1.92035526490857e-12	21.1202196503057	-3.67100685949663	6.10759063198303	-7.16488415639825	2.06882035744754e-09	1.15757360380798e-08	11.3554718100587	4.14270470527953	6.10759063198303	5.77372253321364	3.76702717292457e-07	3.81004684768985e-06	6.40309103294094
4	CST3	-18.3854207617428	7.79534029608208	-24.517733600283	3.31437889638392e-31	6.75138981193405e-28	59.6799249951447	1.16364576892992	7.79534029608208	2.06991545504393	0.0431895426802015	0.0643954753620045	-5.13740559925837	3.05469985464698	7.79534029608208	4.8821841648997	9.4769808729242e-06	4.69974535055425e-05	2.86359415740347	0.339018307853362	7.79534029608208	0.492893330456582	0.624058373005381	0.700080904181056	-6.91749155615664	14.9427722730802	7.79534029608208	25.4755935076274	4.7977825864448e-32	1.22163539107351e-28	62.2248559505612	1.0722012861706	7.79534029608208	1.57715255417327	0.120519534595232	0.156667703873955	-5.82436763465984	-2.18691672893822	7.79534029608208	-1.86942439638752	0.0669137640955487	0.135814405602464	-4.83113799297836
5	MAGED2	-11.892398831977	8.06500493811359	-23.1704857673002	5.60448451379969e-30	7.13520934663123e-27	57.4217797191752	0.832599435888625	8.06500493811359	2.01701192916195	0.0486069134365856	0.0716027499785399	-5.28433140749083	3.20715755859005	8.06500493811359	6.85282792243659	6.69760785427925e-09	6.25253308852742e-08	9.96224374440675	2.62390367183013	8.06500493811359	5.20860632539036	2.95866499364578e-06	2.12095165781074e-05	4.03683240963761	-0.901821926906354	8.06500493811359	-1.85247326140679	0.0693496890563927	0.10330943148155	-5.43100078371056	-0.628925669898708	8.06500493811359	-1.23241321036304	0.223059214050322	0.271915989838723	-6.32038605963804	6.75948576247328	8.06500493811359	9.95267541297409	6.92510439000633e-14	1.63268954194941e-12	21.3883840214409
6	PHC2	-27.2856550526834	5.43418281780042	-25.4870933786107	4.68949702606277e-32	1.19406318026123e-28	57.2635626905516	5.66931599096405	5.43418281780042	8.73098060798706	5.90895005011962e-12	7.16460193577004e-11	17.0352599859645	-0.292105199628022	5.43418281780042	-0.377596188682765	0.707189967082305	0.779347523775511	-6.66352454384014	6.98245986586454	5.43418281780042	9.00903148339657	2.12152185962415e-12	1.00500930884986e-10	18.0459261601091	1.47537576934327	5.43418281780042	1.94275323609409	0.0571939600636567	0.0874655380252768	-4.91090674177096	9.4343739939829	5.43418281780042	12.8679336129002	3.42013140273726e-18	8.95476563930052e-17	30.9995110027545	4.01623463215667	5.43418281780042	3.03209503137847	0.00370604374512954	0.0128039537123963	-2.06789565938592
7	TERF1	16.0810359893094	7.57849827485001	22.7350106099539	1.43903887689518e-29	1.22138424676479e-26	56.6345585766421	0.405850624845532	7.57849827485001	0.580549643351203	0.563925229837429	0.623919659493575	-6.9420980367363	-0.961093107168888	7.57849827485001	-1.21627489134365	0.229096230785092	0.322107276442043	-6.26937937810968	-1.29111759772638	7.57849827485001	-1.42200566681211	0.160694737757006	0.234410089496003	-5.86682550848095	-8.50720153163731	7.57849827485001	-9.28401260947256	7.75547617485364e-13	1.32089506422883e-11	19.0324074299508	1.02875565810561	7.57849827485001	1.27804864837837	0.206622502752581	0.253792835327429	-6.17563846797946	-6.75623003572797	7.57849827485001	-4.39947036259033	5.05501473459404e-05	0.000322998003744449	1.79396300545016
8	N4BP2L2	-6.60276286017611	7.03078457316526	-22.9667502319635	8.69656427611704e-30	9.84161190580578e-27	56.5847078117706	1.68875180000069	7.03078457316526	6.86531063015613	6.39031098259477e-09	3.81732066614239e-08	10.0720392914837	0.57629827394193	7.03078457316526	2.05563132028748	0.0445979935480195	0.0820355001420586	-4.90510542173833	3.31516895627342	7.03078457316526	11.0543912431099	1.44259911109848e-15	1.63254132739311e-13	25.1894117919607	-1.29524198964438	7.03078457316526	-4.46779556375982	4.00428161401367e-05	0.000125565296301506	1.65237181596582	2.84834734988133	7.03078457316526	9.85553367647829	9.80799233092692e-14	1.2660887438592e-12	21.0553627806003	-0.530561530276895	7.03078457316526	-1.09662325341253	0.277604571709204	0.406365391818112	-5.83173499385419
9	FAM89B	-17.9736804234602	5.68597135575344	-23.7481898407107	1.64006523102059e-30	2.38629491113496e-27	56.2711589839351	0.643555653116743	5.68597135575344	1.16676926743794	0.248358791757846	0.307049676045307	-6.2233148030795	1.70839155509266	5.68597135575344	2.6898062878737	0.00945721624160856	0.0217261479999821	-3.36460386874811	3.29503109463439	5.68597135575344	4.79714350043261	1.27844581655894e-05	7.28242205908992e-05	2.90897553801267	-0.710900395962802	5.68597135575344	-1.09003159936494	0.280471955831874	0.350460909109022	-6.15102592317706	10.5940823514195	5.68597135575344	17.4954401298358	4.39123398131193e-24	3.41410061829481e-22	44.0002895064508	2.44352016515974	5.68597135575344	2.22043278792666	0.0305460427729666	0.0722003819082536	-3.93024709368829
10	TCF25	-7.60558177273484	7.06911906161086	-22.7605061571983	1.36119487548042e-29	1.22138424676479e-26	56.1984347611376	1.63644990557104	7.06911906161086	5.84174626522075	2.93040284913803e-07	1.19719827591138e-06	6.28923376126062	2.70955756428607	7.06911906161086	8.60377246602374	9.46112168515031e-12	1.42546633673455e-10	16.5380924602178	2.90598806488367	7.06911906161086	8.42927734979968	1.80808333383912e-11	6.48427068843362e-10	15.9323333407787	-1.68302413667392	7.06911906161086	-5.07984734575672	4.69557395110884e-06	1.79117680494545e-05	3.70447731375551	1.85027415842896	7.06911906161086	5.52498983371331	9.38875751918582e-07	3.20672351887685e-06	5.27038306359321	0.186336216239052	7.06911906161086	0.334981435968153	0.738918716900592	0.820976015232086	-6.38440325756044
11	ZNF428	-16.865532554357	7.1511968212358	-22.4050876655755	2.9689952969166e-29	2.15994407850682e-26	55.2182126995551	5.20630142284786	7.1511968212358	9.3139852534495	6.95276817595932e-13	1.03832762275873e-11	19.0557762004032	1.58569697732864	7.1511968212358	2.44540039759212	0.0177124845770716	0.0373579737870105	-4.15277010868789	4.70699512038534	7.1511968212358	6.95200499271784	4.61128238433146e-09	8.0280136717465e-08	10.4546810115016	-1.58369188880901	7.1511968212358	-2.35700243840772	0.022026135612458	0.0375520909295087	-4.3031920580128	7.03427477537493	7.1511968212358	10.9223923798608	2.27646197317424e-15	3.89676725996297e-14	24.7514196457332	-0.0840438527707548	7.1511968212358	-0.0741883469952769	0.941130821786097	0.962067099694764	-6.46576725770421
12	VIM	-21.7997114073419	10.234124292091	-21.9001967567961	9.14664270353076e-29	5.41902677031475e-26	55.1354241023918	6.56674884342535	10.234124292091	8.79112976774505	4.73193718044845e-12	5.84888109015382e-11	16.8780126691194	6.11391965024056	10.234124292091	7.67788328782287	3.00249053096515e-10	3.45150858441084e-09	12.7745178527643	7.17009020708501	10.234124292091	8.39373744370312	2.06357548078549e-11	7.24741940406902e-10	15.5004387864283	-7.51901005637982	10.234124292091	-8.13877416970636	5.33886923472013e-11	5.79088212519963e-10	14.6177804811242	-1.38230715581495	10.234124292091	-1.47834452243031	0.145044000404559	0.185121947884766	-6.26333777258152	10.8502699187858	10.234124292091	9.90382016782595	8.24877985373392e-14	1.90940506387e-12	21.1516554001099
13	DDX17	-6.00695320223288	8.02625279821463	-21.9152872669797	8.84150617821567e-29	5.41902677031475e-26	54.8843267268318	2.28532324752024	8.02625279821463	9.74727632224956	1.44728212237121e-13	2.5951704958364e-12	20.5664996634564	0.543136468281784	8.02625279821463	2.01119533704808	0.0492368923491283	0.0889302622053328	-5.14818564672126	2.23788025944387	8.02625279821463	7.75001344906333	2.29004044971398e-10	6.02688940060384e-09	13.3676207607661	-1.07674694659869	8.02625279821463	-3.86951867505189	0.000292352769213824	0.000767030642566409	-0.395424850714629	1.67135183628952	8.02625279821463	5.95407702819584	1.93335941865405e-07	7.46478970373364e-07	6.71021223417856	0.346008337296155	8.02625279821463	0.794333456834654	0.43042986131945	0.560411238934569	-6.3348001962867
14	VPS28	-9.05452894996605	7.13760860840414	-21.8797577534404	9.57707234812622e-29	5.41902677031475e-26	54.4135181608845	0.604490709122171	7.13760860840414	1.77620370146013	0.0812542107720493	0.11367776603205	-5.57729922349023	0.418400170922336	7.13760860840414	1.06945659450024	0.289554797745174	0.385858382184299	-6.43493431036071	2.25341262102453	7.13760860840414	5.32229997930779	1.96257525805138e-06	1.49281770001892e-05	4.56211911587934	-0.607130837640534	7.13760860840414	-1.52722549141083	0.132459918880565	0.182558088470712	-5.82756051034542	3.06046147287227	7.13760860840414	7.67849525708564	2.9955960461304e-10	1.99152387270484e-09	13.1373352423653	3.32489481366527	7.13760860840414	5.18936075768882	3.17079875392231e-06	2.72068957950284e-05	4.34100466864388
15	MXD4	-14.9850274116602	6.26000339437528	-21.9958131461196	7.37958383795889e-29	5.01073742597408e-26	53.7396409722175	-2.32961489665572	6.26000339437528	-4.40008205935207	5.04451190441118e-05	0.000133484940884458	1.39420862039749	6.23415088596188	6.26000339437528	10.9747833131035	1.8989623829718e-15	5.25568800830646e-14	24.9237475028178	3.61236030678652	6.26000339437528	5.69834131606624	4.97254419803951e-07	4.5791467140174e-06	5.98408502301715	3.20489425669132	6.26000339437528	5.46303069020021	1.17706600812829e-06	5.07768627394606e-06	5.10333929612928	3.65336596043961	6.26000339437528	5.84324717380132	2.91419129740019e-07	1.08921241702829e-06	6.49406779856777	0.609870898436583	6.26000339437528	0.561148980250033	0.576984826865606	0.691444930183104	-6.11539042109091
16	ADD1	-6.48349778020884	5.89428522739725	-21.531935140168	2.10568102625787e-28	9.18898689026717e-26	52.9809458653502	-0.379585949288415	5.89428522739725	-1.50321354648122	0.138528701485807	0.182832036365549	-5.80491808938163	3.08439499334013	5.89428522739725	10.8887344308466	2.55814807387018e-15	6.91107112264398e-14	24.6104885870853	0.188303007156937	5.89428522739725	0.566367604783284	0.57345752986362	0.655297311978119	-6.5033778108819	-0.292315905598437	5.89428522739725	-0.980565742706153	0.331118721861522	0.40335416602794	-6.28405781145551	0.28424056780992	5.89428522739725	0.916600799368755	0.363370427914871	0.418514961926152	-6.31568044619963	3.5984610667887	5.89428522739725	7.46682064374621	6.63896308877766e-10	9.72918547614396e-09	12.3573345930455
17	NAA38	-8.72714672706433	6.87728046692811	-21.1626637268623	4.91451568589567e-28	1.78765508074455e-25	52.742643345694	2.91248522674672	6.87728046692811	8.64605218853771	8.08976955420467e-12	9.44888794834571e-11	16.6540065645701	1.85313394882903	6.87728046692811	4.85244538355882	1.05249796791294e-05	5.1836033864571e-05	2.89044955205261	2.34098948476259	6.87728046692811	5.58373229159012	7.57320795469782e-07	6.52564492543124e-06	5.51722380629472	-2.4147679397638	6.87728046692811	-5.94195057315461	2.0222689546513e-07	1.01163110526147e-06	6.78963498604517	1.12500610623265	6.87728046692811	2.71643268035253	0.00881340620207004	0.0145414777528079	-3.41266514197852	2.91029990025713	6.87728046692811	4.61927846115471	2.37712847114289e-05	0.000167899122597714	2.44159182015698
18	EFNB2	-21.6195874779358	6.07223531635499	-21.7045665367923	1.42241515428942e-28	7.23939140097045e-26	52.7413102758706	5.93144498908379	6.07223531635499	8.59265831613377	9.85891965675432e-12	1.1169421212908e-10	16.4989448275622	3.23132125062849	6.07223531635499	4.17566983330409	0.000107334095353325	0.000420946384741475	0.71917894367229	2.41090067406446	6.07223531635499	2.75669778681469	0.00791592998185714	0.0184916850608291	-3.20255694127664	1.42052744428913	6.07223531635499	1.76204592786842	0.0836418799358778	0.122030160026775	-5.32853148320949	3.22801017612567	6.07223531635499	3.77546724065247	0.000394907675840632	0.000838294013846777	-0.438583369887377	5.39738294374421	6.07223531635499	4.14893713552868	0.000117305462079678	0.000673791283242854	0.990496465286963
19	YAF2	-22.6802608882906	4.12987053068538	-23.8700247378949	1.26963979823239e-30	2.15521355749949e-27	52.7310442492809	4.48956924364604	4.12987053068538	7.06594242770987	3.00280257112479e-09	1.93934966308852e-08	11.0062245956835	3.4540153278426	4.12987053068538	4.8217120659251	1.17273345130226e-05	5.71770713332384e-05	3.08945345199324	2.22450048372815	4.12987053068538	2.76343414468633	0.00777426355343738	0.0181983163161939	-2.87734922331761	3.86762784120353	4.12987053068538	5.24849076330272	2.56256897359648e-06	1.02633759323949e-05	4.55472490034631	5.36626380129389	4.12987053068538	6.73672279016292	1.03649223048747e-08	5.09000644528203e-08	9.81714879577893	3.27828419057637	4.12987053068538	2.33406993077179	0.0232887792603051	0.0579516776853671	-3.4511502458775
20	FRMD4A	-14.4423687346801	4.56002301171359	-22.5603573389672	2.10919656808596e-29	1.65247438815042e-26	52.5837824951149	-0.00288802413319011	4.56002301171359	-0.00605802091437031	0.995188440743439	0.99593073926751	-6.69568619840311	-2.40288981902295	4.56002301171359	-4.14803038913667	0.000117658951976405	0.000456864821151232	0.91195525605957	4.31439446051458	4.56002301171359	7.25508970543519	1.47302110688977e-09	2.92450681747997e-08	11.6910755469348	5.97532989081862	4.56002301171359	11.1064678386417	1.20570661661873e-15	3.94859224767258e-14	25.1476375328038	3.12987141546955	4.56002301171359	5.44414611008458	1.26088928963128e-06	4.21192437353053e-06	5.21881679624546	3.42855081103349	4.56002301171359	3.53999346484454	0.000825035734640223	0.00361108249132388	-0.642666696290734
21	C5orf24	-11.8717518234468	5.61055312491255	-21.5913249375457	1.83933176923655e-28	8.51527003167013e-26	52.5243132731495	1.21378519322008	5.61055312491255	2.74886202802889	0.00808370364962845	0.0141635165442054	-3.29031142002796	2.99530968170346	5.61055312491255	5.96280727311827	1.87176299865972e-07	1.32942162770915e-06	6.96265110945036	2.88170051782369	5.61055312491255	5.40103094623614	1.4750022311571e-06	1.1618637064451e-05	4.99790805382154	0.953223458579048	5.61055312491255	1.84579435587129	0.0703298097161384	0.104585941299295	-5.04597968463603	2.62266155215749	5.61055312491255	4.92433003262968	8.16507945305722e-06	2.363881018459e-05	3.34905818422069	1.20507141996304	5.61055312491255	1.2787328909954	0.206383118937978	0.326856175771	-5.34688812603227
22	CIRBP	-9.6385826036562	8.33699301124091	-20.6867943365438	1.49053092132419e-27	4.3374449810534e-25	52.2173007637827	3.31244231406906	8.33699301124091	8.64128998601652	8.23366429851309e-12	9.56212894872928e-11	16.5090020800167	1.1739015685037	8.33699301124091	2.64376977000823	0.010672831947179	0.0240759232296828	-3.84844806704223	3.42927143752776	8.33699301124091	7.42024556099163	7.9105972050323e-10	1.7668735204661e-08	12.0928948128769	-0.630748710732794	8.33699301124091	-1.39409282202687	0.168919943076976	0.225888598154408	-6.18192718306557	4.5947371277424	8.33699301124091	10.2354665417545	2.52926386759309e-14	3.63336424420812e-13	22.3358579204588	-2.24102113345392	8.33699301124091	-2.94847085334443	0.00468705304431278	0.0155093032021851	-2.61039012399513
23	TMEM132A	-14.9041991682313	5.54900654106676	-21.5196903384995	2.16529882539432e-28	9.18898689026717e-26	52.138002927667	1.38925130698394	5.54900654106676	2.65275534132391	0.0104248975792063	0.0178240023240249	-3.538114864851	-1.95830902840983	5.54900654106676	-3.16102195346482	0.00256174586031897	0.00690613594159575	-2.12045613914123	3.36545710749817	5.54900654106676	5.20576456417652	2.98908480000813e-06	2.13790931798334e-05	4.3187340913486	2.29269140608567	5.54900654106676	3.86151572818618	0.000299970376690795	0.000785760570319015	-0.13958077015849	10.1471058419897	5.54900654106676	17.5185015097162	4.12972550672196e-24	3.23548109892024e-22	43.9640414215619	-0.331997465916309	5.54900654106676	-0.281376809812532	0.779481775080726	0.849093249111999	-6.05684414281989
24	ARL2BP	-10.9484027852541	5.96058373384047	-21.1909837409448	4.60333817787341e-28	1.7364814570978e-25	52.0958616572933	2.14264692560388	5.96058373384047	5.17084706519255	3.38897677226684e-06	1.11849411618722e-05	4.0309530063678	4.49453874171564	5.96058373384047	9.89474238665025	8.5215179505888e-14	1.79692878523286e-12	21.1938760027869	2.1034909508371	5.96058373384047	4.02947218570584	0.000173940631480328	0.000681903514868031	0.4079208910611	-2.00025552964614	5.96058373384047	-4.00362999267756	0.000189284853717259	0.000517826009967844	0.300705159198041	3.24482714639828	5.96058373384047	6.63140916111602	1.53968345864063e-08	7.3073979619081e-08	9.37434191296677	0.963154550345333	5.96058373384047	1.08285423666459	0.283617560172005	0.413076626676945	-5.62867734898779
25	RDX	-10.0298859294736	7.66363088121668	-20.6874786379798	1.48813349186583e-27	4.3374449810534e-25	52.0090263555463	0.235389958631822	7.66363088121668	0.587601360809014	0.559214860527383	0.619558724515544	-7.01856771749028	-0.492477717179176	7.66363088121668	-1.05765365770093	0.294856133139552	0.391182716689637	-6.49975773439427	0.167778190163171	7.66363088121668	0.333498038640304	0.740031828207113	0.797794545210529	-6.9245446832989	0.0802072287840598	7.66363088121668	0.173405801507403	0.862971774800062	0.891778361032734	-7.04055337575868	-1.05971125637573	7.66363088121668	-2.13976558646064	0.0368449624141995	0.0536937962782404	-4.77852950769551	11.0986995254495	7.66363088121668	18.1648458014644	7.55939267446769e-25	6.75372056047837e-23	45.5599129274151
26	NRIP1	-18.3384399668196	5.04581427487441	-21.8227684989493	1.08892015822074e-28	5.83718516393593e-26	51.919008934211	1.2645140491737	5.04581427487441	2.02795884781446	0.0474401290409479	0.0700861872437073	-4.78358681835244	-2.66339244761579	5.04581427487441	-3.45947934959248	0.00105552645646453	0.00318537176297787	-1.18710758273604	10.9807168031555	5.04581427487441	15.1399240838805	3.17696504973249e-21	1.24451496275098e-18	37.3660102974044	-0.635102023538171	5.04581427487441	-0.854425559465233	0.396591247762928	0.469683937030863	-6.24594058942077	3.09066898822762	5.04581427487441	4.01427972272112	0.000182809323022461	0.000411472476239506	0.454400764594499	6.30103459741673	5.04581427487441	5.2110487666647	2.93276362199615e-06	2.52922925402462e-05	4.46736475119195
27	PLAGL1	-22.4034357017953	4.29282881129234	-22.8663069607913	1.08125562558638e-29	1.10125885465973e-26	51.5393579699422	12.0103256176108	4.29282881129234	19.4535078974453	2.90579810864237e-26	3.28839485961361e-23	48.3223629221263	10.2793067917817	4.29282881129234	15.0465869830122	4.17920273088177e-21	3.12979263338462e-19	37.0960904884026	-4.82605958706534	4.29282881129234	-5.3553095676372	1.74132125307967e-06	1.34664821280307e-05	4.95708502124369	-2.83655018344792	4.29282881129234	-3.51624513018049	0.000887491593280326	0.00207795445461152	-0.936404323369417	-7.37969301537983	4.29282881129234	-7.8392301504631	1.63852799080239e-10	1.14696959356167e-09	13.6857128817753	15.156106078296	4.29282881129234	15.468989594165	1.21846143167611e-21	6.63637950888832e-20	36.7029303403688
28	CCDC50	-11.7314184927756	5.83791851656423	-20.888180774243	9.29763599829091e-28	3.15654742141976e-25	51.3263714850186	0.64943793565579	5.83791851656423	1.43055498216071	0.15823867232049	0.206015707220272	-5.87770842034893	-1.34707114705207	5.83791851656423	-2.50854526265448	0.0151138005562979	0.0325029684683054	-3.75120609076953	1.24150689165098	5.83791851656423	2.16083097586033	0.0350989351790654	0.0657620777775536	-4.427522440162	0.739688697700306	5.83791851656423	1.40208129949111	0.166533448502254	0.223315404428183	-5.77755053147803	6.49416776288232	5.83791851656423	12.5195317901878	1.05720742614389e-17	2.60718102549044e-16	29.8982773457739	3.95368835193831	5.83791851656423	4.58326660600138	2.69244254650164e-05	0.000186294343316027	2.40804462741306
29	H2AFY	-17.3417382428759	7.66865485212343	-20.4343657686804	2.7068315170619e-27	7.06899461571166e-25	51.3018171924941	5.04148665016722	7.66865485212343	7.77818341249706	2.06026129825888e-10	1.69223881635215e-09	13.3747178680581	3.15922784420767	7.66865485212343	4.29996559878913	7.0792126315259e-05	0.000289332988170511	0.945568931279906	2.81007416823637	7.66865485212343	3.55750571950461	0.00078168765921592	0.0025226517139145	-1.28156882152124	3.1389399615358	7.66865485212343	4.23426841101577	8.82673088555012e-05	0.000259527292347945	0.750054945777846	3.33827232792609	7.66865485212343	4.28228624622311	7.51327315548059e-05	0.000181118786008449	0.939381180708216	-0.146262709197249	7.66865485212343	-0.111209052884507	0.911857124800187	0.943635929291801	-6.521712001347
30	COMMD3	-15.152129809375	4.6271459007645	-21.6832951827229	1.49265802081865e-28	7.23939140097045e-26	51.0057997009664	1.1129951447133	4.6271459007645	2.17166360411579	0.0342296407157716	0.0523152597074031	-4.44185630981567	3.47321525254283	4.6271459007645	6.14812851993034	9.39732041857113e-08	7.00158803680665e-07	7.67752712193224	0.108547321897996	4.6271459007645	0.157680942421838	0.875288128206884	0.902765527674644	-6.42246254729007	2.0631232842197	4.6271459007645	3.46717896983614	0.00103107963435604	0.00238238341105178	-1.15376217558153	4.51620420393611	4.6271459007645	7.4700306629748	6.55926837346148e-10	4.07603101791978e-09	12.4772632397857	3.87804460206509	4.6271459007645	3.54616305535329	0.000809509099201739	0.0035568810074934	-0.617667053956089
31	PRTG	-34.0913430091408	5.97153948784481	-21.4485852983671	2.54704676918245e-28	1.03766685376493e-25	50.9961251104959	6.1680253732204	5.97153948784481	6.48860668910722	2.63126936034235e-08	1.35968941831998e-07	8.75136433429948	10.5573029844248	5.97153948784481	10.4673425397941	1.11502187309479e-14	2.64720227913063e-13	23.190367664896	8.41336534899924	5.97153948784481	7.70331901943514	2.72890913185327e-10	6.98340188641346e-09	13.2917171427916	4.84465485819133	5.97153948784481	4.55184633577768	3.00064926816846e-05	9.63480857386372e-05	1.97641909281995	-8.1990207629974	5.97153948784481	-5.15907335693034	3.53534853486091e-06	1.09500391345299e-05	4.25649392853498	12.3070152073025	5.97153948784481	7.98526846583837	9.47946373227921e-11	1.53251330338514e-09	14.3194564668111
32	SEPHS1	12.2664192924313	7.33230416852137	20.102618230605	5.98120041367797e-27	1.42895841866596e-24	50.8233714607331	0.590205990508396	7.33230416852137	0.995963375207069	0.323648011690539	0.387852100137445	-6.60980064283621	-3.33823272733373	7.33230416852137	-4.81216543217744	1.21275133944097e-05	5.90151571533982e-05	2.7638080091954	0.584908061823279	7.33230416852137	0.769837974611622	0.444703821563303	0.535822598204453	-6.57761903274186	-6.53658848837702	7.33230416852137	-8.61093050262987	9.21350505301131e-12	1.19085722036701e-10	16.6047770709474	0.942384028508656	7.33230416852137	1.36316307313841	0.178409123377592	0.22287463775307	-6.04793760584896	-4.50909615756085	7.33230416852137	-3.64580353579116	0.000594238516406342	0.00273365821571752	-0.522475814339346
33	MSRB2	-8.95126254037661	6.63604838009659	-20.2826149225796	3.88533451762992e-27	9.65173952733188e-25	50.6894741957737	1.05107021135105	6.63604838009659	2.86967593110746	0.00582763694545659	0.0104811022937446	-3.1578789079228	1.72501331360667	6.63604838009659	4.14576940350063	0.000118544884153123	0.000459429088698463	0.606002581471804	1.81607884452028	6.63604838009659	4.0066288357332	0.00018743935199755	0.000727541844548419	0.240420849710918	2.33050515456119	6.63604838009659	5.55153634110549	8.52038676520444e-07	3.76649909737879e-06	5.39105427873395	1.58167067350609	6.63604838009659	3.60152419837368	0.00068211399103978	0.00139225070115033	-1.01100309805861	0.446924342831345	6.63604838009659	0.606050792353869	0.546984719534094	0.664246973703917	-6.1782822743314
34	IDH2	-16.3958621668022	6.63762276016412	-20.3673289743252	3.17461551550964e-27	8.08336475636642e-25	50.6495213986927	3.99778623935023	6.63762276016412	6.79146368283232	8.43667378664128e-09	4.87548635280612e-08	9.78544381388462	1.24653028396315	6.63762276016412	1.83547114124064	0.0718676864659033	0.122117515291162	-5.31577082263293	3.74265667323021	6.63762276016412	5.08358003046986	4.63333848401196e-06	3.08636706734217e-05	3.75949439863716	-1.86985911613669	6.63762276016412	-2.66237106663889	0.0101654167179517	0.018899933144079	-3.56249133642573	2.03191567461485	6.63762276016412	2.79093752901685	0.00721975138973481	0.0120982507246543	-3.22823788677968	7.2468324117804	6.63762276016412	7.04254211643716	3.27938139544975e-09	4.4297744711745e-08	10.9277597220335
35	PGLS	-6.05924809237897	7.60115186323281	-19.9739984619319	8.15565325356695e-27	1.76734741250169e-24	50.4410584191896	1.45407439530385	7.60115186323281	5.60726701985489	6.94747983809267e-07	2.61203699339143e-06	5.37502892295199	-1.0320627962043	7.60115186323281	-3.41534799123073	0.00120662043585124	0.00358617480330269	-1.70934254455383	1.84225758348889	7.60115186323281	5.70705618226515	4.81564531450833e-07	4.45479995715417e-06	5.89140257237827	1.38832032835551	7.60115186323281	4.65529662920588	2.09795231272312e-05	6.98289029577941e-05	2.16334754005698	0.685197007650481	7.60115186323281	2.1705184804835	0.0343206321398251	0.0503755063185067	-4.72438969459204	1.72146157378452	7.60115186323281	3.55642564089841	0.000784297099526595	0.00346253400896331	-0.910660286073958
36	TCAF1	-17.5034810720184	5.04144743212342	-21.0315753227492	6.65834261270256e-28	2.33845584518536e-25	50.3632001227087	1.08983067023056	5.04144743212342	1.79223757055694	0.0786190593589709	0.110385321142972	-5.217038134644	1.66604272184243	5.04144743212342	2.33577120820777	0.0231929375800889	0.0471403051792467	-4.04265121633884	8.16988431749544	5.04144743212342	11.5369356829845	2.77276291909165e-16	3.71586714880901e-14	26.6301022943974	1.43144030213412	5.04144743212342	2.02622455470232	0.0476233511541222	0.0743932256909102	-4.66284541004522	7.28336939609917	5.04144743212342	10.5846998699087	7.38404638055663e-15	1.17326852396208e-13	23.5068898057674	-2.13708633578332	5.04144743212342	-1.48006600898749	0.144585360449405	0.248121633728255	-4.9428019772114
37	UGP2	13.580714004883	7.39364682636441	19.8935300262473	9.90945516349182e-27	2.01855601680328e-24	50.3234798182299	-0.212551190712426	7.39364682636441	-0.316569096488212	0.752774063777115	0.794178976545465	-7.03487567798573	-2.58297899834797	7.39364682636441	-3.36523271728751	0.00140304725426446	0.00407937090627563	-1.7778620734633	-2.59194672036206	7.39364682636441	-2.90445425702013	0.00529570666908861	0.0131073566038074	-2.87330060492214	-2.93637702501543	7.39364682636441	-3.68206702903898	0.0005304398747383	0.00130575472066738	-0.819115169935318	-0.174426581719016	7.39364682636441	-0.221150397848613	0.825797763554772	0.854143416452255	-6.91716158203136	-5.0824334887261	7.39364682636441	-3.55312726797186	0.000792317388848275	0.00349037742448948	-0.761822684574828
38	HP1BP3	-10.5146275991359	6.66870831625598	-20.0990390174654	6.03291232230105e-27	1.42895841866596e-24	50.2639021987707	3.54838791263979	6.66870831625598	8.30417081956259	2.88034185542393e-11	2.92194041807696e-10	15.4208030281934	1.27127320675367	6.66870831625598	2.58086860667255	0.0125647911530621	0.0277356735790936	-3.74969475587166	3.33945054075996	6.66870831625598	6.38072434210234	3.941762568351e-08	5.15463458019422e-07	8.4186598437671	-1.41426804883928	6.66870831625598	-2.79513337494093	0.00713843613411785	0.0137101587829512	-3.20337971020011	3.87147055614156	6.66870831625598	7.65459206163672	3.27705747885344e-10	2.15891529250468e-09	13.0930100820655	-0.101686568319767	6.66870831625598	-0.113267082121885	0.910232982319928	0.9425297808996	-6.32193301583277
39	MARCKS	-18.0938721154482	9.01694788951087	-19.8064626165313	1.22425505800341e-26	2.44490936583622e-24	50.2221975799971	5.54927578209769	9.01694788951087	8.07389903536972	6.80390372059307e-11	6.32856250175711e-10	14.3231676858072	-0.911911556718097	9.01694788951087	-1.09533959319635	0.278161352352992	0.374052465502406	-6.64656548252878	4.80943113158631	9.01694788951087	5.81554831272221	3.22821313286879e-07	3.16756751043051e-06	6.07241116569396	-4.96870581779633	9.01694788951087	-5.79647022492621	3.46378618439846e-07	1.66408784377822e-06	6.0393944657669	6.78779482984978	9.01694788951087	8.54953257068079	1.15683646830262e-11	1.02633967157336e-10	16.1789159446287	6.82798774642885	9.01694788951087	6.1682572961227	8.71808902121478e-08	9.84409497572867e-07	7.57537399879721
40	NSD3	-9.25793189376142	6.82314609740285	-19.9276439509596	9.12339159989687e-27	1.89636211112142e-24	49.9730562415913	3.3551021138235	6.82314609740285	8.77971273217548	4.93560786328735e-12	6.0932322530402e-11	17.1525627651576	0.190897242050392	6.82314609740285	0.433381206842778	0.666440019575785	0.745408697493891	-6.84809010865077	2.75253564572397	6.82314609740285	5.85474597876359	2.79290623670186e-07	2.80807009089915e-06	6.49523917137641	-2.46741748739365	6.82314609740285	-5.34248111646067	1.8242187304933e-06	7.52517933174332e-06	4.6623454157626	5.55186751216619	6.82314609740285	12.5606931096816	9.24491112998626e-18	2.30782891811054e-16	30.1426815834955	-0.125053132608979	6.82314609740285	-0.159173921818078	0.874117381150786	0.917634047311972	-6.36139404735325
41	DPPA4	13.7473551014363	7.13706326891142	19.7676533873692	1.3455485919117e-26	2.58573819030579e-24	49.9497936294793	1.0473233948052	7.13706326891142	1.53440677312511	0.130686602513559	0.173561487364793	-5.87677892110409	-4.52823645610529	7.13706326891142	-5.62358384269616	6.54396634915718e-07	4.17346883319761e-06	5.6539768598282	1.57375514712243	7.13706326891142	1.83642682090364	0.0717241372231832	0.11942297492531	-5.18343826253616	-9.46535365675354	7.13706326891142	-10.3122307754179	1.92722897628579e-14	4.66242924547999e-13	22.6199907203399	1.55550148570398	7.13706326891142	1.96081678615143	0.0549937684342907	0.0776745987384899	-5.03573808015402	-3.93034501620906	7.13706326891142	-2.73367261510263	0.00841827746536068	0.0251732695198763	-2.87766705200767
42	PLEKHO1	-14.5452373328342	6.48751720349988	-19.986180958676	7.91908105981999e-27	1.7533878390058e-24	49.8254074138601	3.26843857014659	6.48751720349988	6.02931120553582	1.46225971349736e-07	6.34019377691385e-07	6.98875890311598	1.78119431430214	6.48751720349988	2.83393414317999	0.00642552768658326	0.0155007104424089	-3.16833916006153	5.15579833056585	6.48751720349988	7.8102841560734	1.8264587912453e-10	4.90830680444151e-09	13.6649119170142	-3.61069980408069	6.48751720349988	-5.39185824278027	1.52499011139703e-06	6.41554080321305e-06	4.84456887651466	6.6133037471318	6.48751720349988	10.5769479669426	7.58744278974882e-15	1.20183677781636e-13	23.5691778160574	1.33720217476851	6.48751720349988	1.26090454133797	0.212688194711527	0.333997152464439	-5.65461675046175
43	CCDC167	-13.4565951051508	6.25600114007775	-20.0077258129942	7.51762734842411e-27	1.70148965652666e-24	49.7589298624356	3.24795067426699	6.25600114007775	6.09255233971992	1.15581601871298e-07	5.11825484808336e-07	7.28584679397817	-0.863417190582759	6.25600114007775	-1.39709703325482	0.168019383578799	0.248047169408619	-5.88856171866041	4.49417886375949	6.25600114007775	6.97925843279991	4.16165460683765e-09	7.29543066620335e-08	10.6367310400542	2.23930130808111	6.25600114007775	3.65837353470988	0.000571335084409171	0.00139679496752458	-0.831489053002082	4.05593804561179	6.25600114007775	6.40272719178369	3.63007204392585e-08	1.60609399510794e-07	8.5129489859173	0.282643404014163	6.25600114007775	0.247069254280291	0.805778438046045	0.86826633426777	-6.22154631326571
44	RHOBTB3	-30.7327658579525	6.05065026880795	-20.7095937025222	1.41272711219457e-27	4.3374449810534e-25	49.4759647353928	-2.0986250314965	6.05065026880795	-2.34661405596901	0.0225903303029344	0.0358831119986567	-4.29670900560657	15.1971095333652	6.05065026880795	17.0419853148986	1.48582314410819e-23	1.61336915984277e-21	43.1014395635601	-1.25454192712113	6.05065026880795	-1.14364555501328	0.257744813755696	0.345230264084924	-6.10530330609285	10.2289330774448	6.05065026880795	11.0088862143974	1.68786660196487e-15	5.27328875491173e-14	25.0400275165082	4.5779656143276	6.05065026880795	4.41360931948307	4.81760470700607e-05	0.000120588114870624	1.55589249686687	4.08192459143256	6.05065026880795	2.41045042174085	0.0193178257244702	0.0497980397377192	-3.61152972152179
45	H1FX	-8.99435458810091	8.58359041854524	-19.3841371740765	3.44865223994496e-26	5.68268809078185e-24	49.2504999156784	5.65437903284197	8.58359041854524	14.9612257119321	5.37526188217122e-21	1.21660093933142e-18	37.5492202253966	-1.97274514953256	8.58359041854524	-4.29637662224485	7.16530986680083e-05	0.00029261700478495	0.853220878944188	3.39670803921324	8.58359041854524	7.29454476599398	1.26968090834692e-09	2.58634001030268e-08	11.5962272966695	-1.52518391249272	8.58359041854524	-3.3245845868104	0.0015842391132416	0.00350390344589917	-2.09027110370929	4.60530526992198	8.58359041854524	10.3286291918902	1.81865955964248e-14	2.70804789692378e-13	22.6400126180731	-1.164108691851	8.58359041854524	-1.61678066729799	0.111671695730102	0.202718930982191	-5.46598188371927
46	JARID2	10.2943030672754	6.54723503436156	19.446837403307	2.95399202429529e-26	5.01440146124125e-24	48.9938881931668	0.677889661496905	6.54723503436156	1.33177471000505	0.188450321481204	0.240431732968316	-6.08131194094022	-3.62939685989034	6.54723503436156	-6.06729994858003	1.26967047852652e-07	9.22367605120732e-07	7.29832336524803	-1.79741506338888	6.54723503436156	-2.68781450182896	0.00950706823361742	0.0215320191148307	-3.30519084999937	-5.14168527697814	6.54723503436156	-7.9572941094658	1.05263467371514e-10	1.06677454246654e-09	14.2462418913558	3.4801567668157	6.54723503436156	5.98007119719236	1.75563424902215e-07	6.83007441798723e-07	6.96674623913365	-3.88385229533066	6.54723503436156	-3.52749433261519	0.000857365794060299	0.00372696142232358	-0.756847030697923
47	PHC1	14.3137113810954	3.63942512133089	20.8550437481141	1.00459897195759e-27	3.30059371915745e-25	48.9786957668343	0.308992711532681	3.63942512133089	0.460684218264115	0.646849259263661	0.701465045315203	-6.27119453895939	-1.96043259268436	3.63942512133089	-2.47744615690383	0.0163471879486385	0.0348026984232615	-3.387991572539	-2.48332772231662	3.63942512133089	-2.63355139879742	0.0109613210562733	0.0244130887728282	-2.92465706800655	-5.29757048187658	3.63942512133089	-5.9417853759186	2.02350775666321e-07	1.01175387833161e-06	6.90564100932068	-0.395995250614597	3.63942512133089	-0.483839076387212	0.630429089132786	0.677383719043931	-6.08522662660958	-4.48537804513592	3.63942512133089	-2.46811256097118	0.0167346961995874	0.0444788311045923	-3.06291236209633
48	SRR	-13.0479930858795	3.69973904304005	-21.3279742414774	3.35797996540988e-28	1.31542407491152e-25	48.801644102444	2.99535714760464	3.69973904304005	6.34898697749751	4.43885097670319e-08	2.17878058784203e-07	8.42872923699255	2.10875089356128	3.69973904304005	3.84891296593949	0.000312354814575492	0.00108763548254748	0.0854819233079018	3.83300733736345	3.69973904304005	6.17558850398312	8.48302195834186e-08	9.97685665654871e-07	7.78757232286354	0.738781428208088	3.69973904304005	1.29041132109871	0.202329249039191	0.264127582858775	-5.51601686932274	0.716646159036719	3.69973904304005	1.20319709972083	0.234075350977701	0.284019233941849	-5.59330192940851	2.65545012010527	3.69973904304005	2.43485346137484	0.0181837983636875	0.0474934732459502	-3.17390501268439
49	PON2	-12.9656792366445	6.10627342985352	-19.6224264138404	1.91854168882882e-26	3.31192323741043e-24	48.7465086858437	5.19057807983279	6.10627342985352	10.1207432070905	3.80172695992912e-14	8.05001852118047e-13	21.9838124295369	4.83823572269731	6.10627342985352	8.50531164205873	1.36313637246939e-11	2.00919594118679e-10	16.2179639177275	3.26024106729094	6.10627342985352	5.21290323916597	2.9132468234589e-06	2.09248370218116e-05	4.27843692058538	3.8717370712114	6.10627342985352	6.68315087723263	1.26769039905875e-08	8.2238386716009e-08	9.53017757431031	-3.21112470721612	6.10627342985352	-4.66724742669096	2.01261038640793e-05	5.41570324585595e-05	2.47908609453864	-0.983987997171841	6.10627342985352	-0.891089918596164	0.376778949585904	0.508951406038784	-5.84339921063971
50	USO1	8.27833375164237	6.28220260422896	19.3378728698581	3.8669474887278e-26	6.25156510677661e-24	48.6369131592733	-0.986511682154342	6.28220260422896	-2.41901805860883	0.0189126417641502	0.030541502515914	-4.12665464031198	-1.74912664114887	6.28220260422896	-3.69151703539788	0.000514923652554375	0.00169357223856843	-0.685868018611291	-0.599516299618708	6.28220260422896	-1.12237863056098	0.26659791357468	0.354524056633779	-6.05256653201473	-1.85723576907091	6.28220260422896	-3.80299589265312	0.000361769085520525	0.000926714822944304	-0.319921775785073	-0.21069426518957	6.28220260422896	-0.43180469437149	0.667578557528824	0.71196728884095	-6.67437163741542	-2.87524909445997	6.28220260422896	-3.30761051174448	0.00166627184401476	0.00657025889713135	-1.3481336216606
51	TMSB10	-10.1575436615929	11.3976298088649	-19.0564830492741	7.79293022389767e-26	1.1337045086518e-23	48.6186172394171	-4.26304170699264	11.3976298088649	-9.09585317423301	1.54288167593267e-12	2.10364790754675e-11	17.9282321898889	0.291864283702116	11.3976298088649	0.576079033799255	0.566921622969407	0.656819102484746	-7.41641541832875	1.85582964361376	11.3976298088649	3.43409169776513	0.00114009554548754	0.0034880964646412	-2.09765785440923	2.21631982706223	11.3976298088649	4.39202198239237	5.18462361992062e-05	0.000159581116859751	0.810498434727325	4.79585095261321	11.3976298088649	9.38655651060122	5.33856470907205e-13	6.00146595605947e-12	19.0458827466177	5.26072066159421	11.3976298088649	7.52040696320715	5.42698067478993e-10	8.05169585823309e-09	12.3780912734943
52	KTN1	-6.78906024887527	7.90646129974152	-19.0508776030528	7.90309475839744e-26	1.1337045086518e-23	48.3240405692521	1.01256546836031	7.90646129974152	3.34022019049456	0.00151206769004713	0.0030309800084885	-2.08883116475847	1.97837830796383	7.90646129974152	5.73618789163039	4.32591890502233e-07	2.88158823071631e-06	5.89411776876539	1.14047448455634	7.90646129974152	3.04976391765824	0.00352496104035715	0.0092364864948277	-2.69728762456122	1.1267093000692	7.90646129974152	3.22211128228417	0.00214415534437944	0.00461005988443939	-2.28889887222512	-0.674510211180326	7.90646129974152	-1.8059837306479	0.0764171380490809	0.104295749572402	-5.43790736590228	2.20544289910592	7.90646129974152	4.10394860403898	0.000136145364573165	0.000766099744849549	0.665514740451356
53	TBC1D23	10.8813426838893	4.67376697387447	19.7066029109804	1.56157646435393e-26	2.89175568898996e-24	48.2663053853158	-3.45378436004596	4.67376697387447	-6.47542858717956	2.76452872567755e-08	1.42349469519848e-07	8.86576104069341	-0.240588852557483	4.67376697387447	-0.393553631706942	0.695438573323126	0.769477660977299	-6.41254717425934	-1.23670123970708	4.67376697387447	-1.77569608650657	0.0813388256134625	0.132401460583845	-4.84663888236119	-1.84171657938147	4.67376697387447	-2.83914296027667	0.00633499917541786	0.0123298235432125	-2.69901906095136	-1.95954234278841	4.67376697387447	-2.93297480668707	0.00489349737744362	0.00850371451787464	-2.45246273575164	-2.14900930940886	4.67376697387447	-1.70272519523838	0.0942891450745927	0.177795674941582	-4.49408549205499
54	ZNF518B	-15.2999178707239	4.02277496003789	-20.6343591620201	1.68641156689207e-27	4.77113939133214e-25	48.1812218788433	2.62925953985807	4.02277496003789	4.62455545792291	2.33406547802973e-05	6.62185428794785e-05	2.41174967270463	2.44297511592242	4.02277496003789	3.74678577097156	0.000432525325578176	0.00145388463399793	-0.26446579854001	2.10443137203515	4.02277496003789	2.80890964546325	0.0068773556117305	0.0163735079255435	-2.69255147470236	3.57712188265551	4.02277496003789	5.3640994614829	1.68667872195318e-06	7.02610338776815e-06	4.97485505739007	1.72224205450524	4.02277496003789	2.33375945203232	0.0233063081891337	0.0353236233491558	-3.77592131408601	2.82388790574753	4.02277496003789	2.33248122428178	0.0233785980610887	0.0580758588419971	-3.44151760382633
55	GPR161	-13.0990321426492	4.77568595325867	-19.9464871721005	8.71666239117786e-27	1.84956680112805e-24	48.0991718302629	4.23948048499004	4.77568595325867	8.70329505905934	6.54570533139365e-12	7.8248836620005e-11	16.950802556898	1.16412584948322	4.77568595325867	2.08532001371825	0.0417140555208001	0.0775597636018324	-4.54675541654139	2.33835440365447	4.77568595325867	3.7871775552321	0.00038046951073194	0.00135161561451162	-0.202500090034991	-1.90434212239265	4.77568595325867	-3.13166687978303	0.00278855510517297	0.00585355188503435	-2.05353689748158	5.20799680679746	4.77568595325867	8.85532016530669	3.73445553705833e-12	3.59503115736664e-11	17.459116335996	2.05341672011665	4.77568595325867	1.93926978712281	0.057626797884664	0.120692769166215	-4.27976373459622
56	UBE2R2	-8.38027854052172	7.37030879127065	-18.9735269736951	9.595307679304e-26	1.33874258511933e-23	47.9824997037627	2.68575147675725	7.37030879127065	7.33786499686776	1.07861842651309e-09	7.60258039725663e-09	11.7688936971022	0.944534098304344	7.37030879127065	2.24464964619583	0.0288503926635048	0.0566823397526613	-4.60432763247208	2.42307763277685	7.37030879127065	5.36938933226819	1.6546135442877e-06	1.28643045408933e-05	4.69772755160264	-0.302681668307502	7.37030879127065	-0.701744804188771	0.485809775701538	0.556426883413712	-6.75660704273025	2.6806347160723	7.37030879127065	6.12643977212787	1.01881535473314e-07	4.14402331787423e-07	7.39867276282516	-0.0510377150815486	7.37030879127065	-0.0708056269363003	0.943810369881052	0.963683747060444	-6.50550013835668
57	COPB1	-5.27109055588751	6.67330758626025	-19.0352905641212	8.21781638219118e-26	1.16247860906413e-23	47.8925465825182	-0.743157517441338	6.67330758626025	-3.11143185193894	0.0029557271460205	0.00561643301907066	-2.51451936715005	2.11841983972483	6.67330758626025	7.89793424331479	1.3148184560385e-10	1.62123801147121e-09	13.9803812073151	0.238319315465775	6.67330758626025	0.798179837939496	0.428213580658749	0.520319939818806	-6.48851111502169	0.980575097002642	6.67330758626025	3.56899600236612	0.000754435153425527	0.00178945552809478	-1.11736359548146	0.59102640995135	6.67330758626025	2.05628940457768	0.0445322403348899	0.0639809377642621	-4.79689397531024	2.08590741118423	6.67330758626025	4.71821927268329	1.68519508112649e-05	0.000123479941735779	2.7961315229103
58	HOMER3	-12.8588249265261	6.46598908848983	-19.0904038648483	7.15875364226438e-26	1.09564857941235e-23	47.8216592847524	-1.07148605516796	6.46598908848983	-2.04119245973076	0.0460619924032817	0.06830829828588	-5.01479629304107	0.406895615644133	6.46598908848983	0.662919853115042	0.510162350485929	0.603835391016756	-6.68376899682489	2.50365348095652	6.46598908848983	3.85070955753763	0.000310559763442859	0.00113574549036464	-0.248058551722368	-2.05613137642197	6.46598908848983	-3.25753049253478	0.00193232109412634	0.00420168453110093	-1.98559231427371	5.02347786119858	6.46598908848983	8.16234882159496	4.88884988625265e-11	3.79519329965573e-10	14.9572870802254	8.05241540031676	6.46598908848983	9.17211333672642	1.16704672733978e-12	2.33523986600307e-11	18.5549254854776
59	TMCO1	-6.50420846201592	7.17862297133006	-18.824835654211	1.39557337566636e-25	1.87025195146866e-23	47.5890863457774	1.48638983835679	7.17862297133006	5.09100800623494	4.51189553094407e-06	1.4560727497676e-05	3.59688270396838	1.21363412599856	7.17862297133006	3.66077267525266	0.000567060724823116	0.00184050780188765	-0.963800872819878	1.75841244578119	7.17862297133006	4.91475682138893	8.44645620428503e-06	5.12371390355229e-05	3.13850819485315	1.77661425932655	7.17862297133006	5.31967424184734	1.98132128022908e-06	8.11409619587179e-06	4.50105338593036	1.58724206123351	7.17862297133006	4.55882478995041	2.92935259580662e-05	7.63055145480573e-05	1.91331568136761	-1.31808426868068	7.17862297133006	-2.21790880295769	0.0307277352190051	0.072545661382839	-4.10260464781823
60	KDM6B	-14.3027061856045	5.37087840855814	-19.3828937808115	3.45927011908173e-26	5.68268809078185e-24	47.4570250574017	-3.31064380357187	5.37087840855814	-5.69828315250657	4.97360817511496e-07	1.93418095698915e-06	5.98754761753525	6.24109585834269	5.37087840855814	10.0417215987949	5.03808851223619e-14	1.09643016019499e-12	21.6812004732947	0.636835975290765	5.37087840855814	0.874768698811919	0.385519799761433	0.478260555489671	-6.20104268273613	0.992750874479613	5.37087840855814	1.47559045785328	0.145780121173198	0.1987378576026	-5.58102072395758	8.23973708431517	5.37087840855814	12.6718656455808	6.44211689488345e-18	1.6403240143597e-16	30.2802930568362	1.50293019674817	5.37087840855814	1.29034135102927	0.202353358549604	0.322026399504331	-5.33158865534324
61	HIPK2	-11.2378479751285	5.55458703705228	-19.1691465935924	5.88100420948193e-26	9.21508121131899e-24	47.4546132847162	2.80065484646384	5.55458703705228	6.03337641947216	1.440336508842e-07	6.24779699427416e-07	7.13932337107089	-2.66399301245071	5.55458703705228	-4.74368921406971	1.54173528125706e-05	7.32054724457026e-05	2.72359020678906	2.92208560349721	5.55458703705228	4.97372332842155	6.8532832341664e-06	4.26915533577888e-05	3.53085330086855	1.42854076746174	5.55458703705228	2.5885904838993	0.0123171313806431	0.0223937849182167	-3.54480236070305	2.28565129918563	5.55458703705228	4.05776283799119	0.000158520865394795	0.000360709341833331	0.502197356732881	4.46490847097082	5.55458703705228	5.01400919284484	5.93863903861941e-06	4.77764917917367e-05	3.81962108973667
62	ATP2B1	-12.8561078385925	7.13160317875293	-18.800611123939	1.4837075176307e-25	1.9625403983206e-23	47.3992571291858	4.55024181943878	7.13160317875293	8.17778776325421	4.61497386687559e-11	4.45530889423013e-10	14.9259154716834	8.69000192662287	7.13160317875293	14.4060398838413	2.82332563508915e-20	1.77503528354216e-18	35.8506723598904	-0.315752297687838	7.13160317875293	-0.452409025577057	0.652761266244136	0.724618364762564	-6.78487997417668	4.91721957742377	7.13160317875293	7.90828268395414	1.26480091504608e-10	1.26294091370043e-09	13.9840377421024	0.616698302608518	7.13160317875293	0.897927917862071	0.373154478429642	0.428475576415547	-6.50231177303825	-5.60230148981359	7.13160317875293	-4.37831831840329	5.43158174245234e-05	0.000341696479597759	1.74935132405159
63	DNAJC15	-6.98544811319564	7.50843240226116	-18.6764054921667	2.03286660127933e-25	2.54738744036888e-23	47.3152234271755	-1.92788415293905	7.50843240226116	-5.99685626371282	1.64959118252714e-07	7.07712139597258e-07	6.81174109668347	4.64787458902067	7.50843240226116	13.2815439555603	9.14084936547964e-19	4.41230098518531e-17	32.4587236540494	-0.4514480025937	7.50843240226116	-1.10953010824764	0.272049626772056	0.360268553981718	-6.32057910900219	4.77594425226639	7.50843240226116	13.5651861347645	3.74537486367908e-19	3.49969201711665e-17	33.3319350893301	-2.09556036258577	7.50843240226116	-5.29187578594579	2.19094378702183e-06	7.05270621707248e-06	4.42744063548337	2.03652179002709	7.50843240226116	3.45771776791463	0.00106119653258031	0.0044810475474007	-1.18249617651973
64	LRRC47	6.41965164691443	5.38796199455043	18.7687218037178	1.60841261584743e-25	2.07363069524128e-23	46.7998132521728	-0.0280715874648703	5.38796199455043	-0.0878453139116742	0.930320032859733	0.944790828883309	-6.7777004334436	-0.966938821683486	5.38796199455043	-2.61817503592475	0.011408866246695	0.0255102750214244	-3.42328810691395	-1.6422246444707	5.38796199455043	-3.82523078212692	0.000336969447131772	0.00122049566822087	-0.065493454995857	-2.1110329601444	5.38796199455043	-5.3801377214594	1.59130294569253e-06	6.66972037114339e-06	4.97199872774397	0.187111241878745	5.38796199455043	0.472544817237692	0.638415614178588	0.685025603709326	-6.47509830010257	-1.8584948750297	5.38796199455043	-2.50232760516306	0.0153534416203669	0.0413471186947215	-3.16079227016927
65	EVL	-11.2287908241751	6.14688903010839	-18.7176974870769	1.83049686706784e-25	2.33045132388574e-23	46.7818182009711	2.94089423276284	6.14688903010839	6.25377815549311	6.33624384420794e-08	2.98081494472323e-07	7.87496808413291	0.774417966692373	6.14688903010839	1.43896293149418	0.15585180549359	0.233536948499664	-5.84338477397799	2.65152083089729	6.14688903010839	4.53913946986033	3.13484645982857e-05	0.000156358526901832	1.988824322917	-2.24618651091442	6.14688903010839	-3.89259761960276	0.000271413256567285	0.000718011433282545	-0.0730450500744979	7.5292549572554	6.14688903010839	14.0479405864387	8.39825470178692e-20	2.88973730194932e-18	34.6615732584618	-0.421110652518379	6.14688903010839	-0.423693592882804	0.673448682431766	0.770769168509668	-6.1781364908516
66	SEPTIN11	-10.4080252112916	7.49968909628092	-18.3659127781839	4.4970246785846e-25	5.08913292793157e-23	46.4966429762181	1.96145170255104	7.49968909628092	4.26494521804406	7.96408823313632e-05	0.000203446798732113	0.766140697224039	2.28354656326497	7.49968909628092	4.36402162926837	5.70142028270343e-05	0.000238476244678991	1.18676969863418	3.43289245438803	7.49968909628092	6.1522085345157	9.25552018448348e-08	1.07122128498823e-06	7.49334397615453	-1.50213892786758	7.49968909628092	-2.75127001608128	0.00803180061440074	0.0152847326714633	-3.43360532971734	2.66090215850006	7.49968909628092	4.86301733824284	1.01400130380282e-05	2.89060634098399e-05	2.89367529450106	1.57137126045509	7.49968909628092	1.82999032666141	0.0726956178730265	0.144950052473918	-4.95348085509305
67	CPXM1	-13.2436301705301	5.02235890654805	-18.9609621829163	9.90308194478415e-26	1.36301202172468e-23	46.3588129387145	2.90676384437666	5.02235890654805	5.5605810810423	8.2430559711839e-07	3.06630843924427e-06	5.48584912922118	5.52572688563772	5.02235890654805	9.53351581249249	3.13169681603994e-13	5.90672816136422e-12	19.9024992872975	5.23112037751487	5.02235890654805	8.19990391201541	4.24926434002118e-11	1.38270790105801e-09	15.124814311441	-4.80159235951248	5.02235890654805	-6.81251067398628	7.79454865488237e-09	5.3137535508686e-08	10.0962135195788	-3.19441683928183	5.02235890654805	-4.53312819848491	3.20035529086076e-05	8.27720127918151e-05	2.13689535808563	7.57602826179512	5.02235890654805	7.68219307241213	2.95427254881109e-10	4.53151595024714e-09	13.0056970303491
68	HOOK3	-8.12208183563698	5.67514114235083	-18.5699369179779	2.66607302603461e-25	3.23261354406697e-23	46.2247400768735	0.222154951960799	5.67514114235083	0.616214106981479	0.540306037978735	0.602146514587309	-6.68433449206617	0.546228994123321	5.67514114235083	1.32664499054616	0.190131292249681	0.274952039125798	-5.88952508461207	2.34540664134005	5.67514114235083	5.08498196699175	4.61017407282058e-06	3.07294652694225e-05	3.92002647072682	1.59967894541844	5.67514114235083	3.83802049713717	0.000323453450697358	0.000840187042936137	-0.198640697165126	0.808712767418253	5.67514114235083	1.8189209805308	0.0743922258571863	0.101921552374959	-5.07425382322443	2.59989953537615	5.67514114235083	3.63055195288622	0.000623207765359882	0.00284763171385841	-0.465575208170815
69	ANTXR2	-18.3280500226486	3.53601503232392	-20.5766855132558	1.9322601086601e-27	5.31893762343327e-25	46.204031853829	-0.851253058785661	3.53601503232392	-1.3797449572381	0.173272337853116	0.223616163334261	-5.57332423846726	4.28591059715233	3.53601503232392	6.12835864421034	1.01155972302506e-07	7.50381338602349e-07	7.64857612438308	-4.07564390829892	3.53601503232392	-4.73159474797346	1.60830088757015e-05	8.87834392406609e-05	2.90060977171913	0.571197184113484	3.53601503232392	0.738236667282139	0.463522335582307	0.535622304051032	-6.02353063889851	2.44686141072319	3.53601503232392	3.07004066977682	0.00332735452605813	0.00598113410658349	-2.01128440917793	15.9509777977441	3.53601503232392	16.9470520476328	1.92321569499708e-23	1.37943322912291e-21	38.6874612460885
70	ATP5F1E	-9.12786640654519	9.51205609668966	-18.0994673424247	8.95815081376189e-25	9.40605835444998e-23	46.1506667279117	1.12206728661499	9.51205609668966	2.65695823557277	0.0103107461974065	0.0176466056159613	-4.09315952791573	2.23659727299389	9.51205609668966	4.65266959694599	2.11718132529438e-05	9.74841401361811e-05	1.89361441190767	2.33966675397266	9.51205609668966	4.53455146455189	3.18472534404677e-05	0.000158229591381861	1.5629192558129	-0.0374364842185066	9.51205609668966	-0.0758138528074103	0.939843454331344	0.953796889434509	-7.30932678463524	2.71401635259009	9.51205609668966	5.38693655251145	1.55249724523674e-06	5.11059613533813e-06	4.4873202323089	0.752955224592057	9.51205609668966	1.03224105554304	0.306496001929354	0.438066486058163	-6.4026873740613
71	ZFYVE16	-8.78908576756283	5.4227328588087	-18.6304877370133	2.28474256797557e-25	2.80362687407605e-23	46.141819058288	2.76965822954388	5.4227328588087	7.19873049776504	1.82126005020449e-09	1.22682100604052e-08	11.4370936058142	2.75089378430898	5.4227328588087	6.32287598754292	4.89424367060039e-08	3.87921181206731e-07	8.27250483714738	1.05590017558546	5.4227328588087	2.14703070811602	0.0362343810085537	0.0675910568813405	-4.39082253474728	0.677905989893178	5.4227328588087	1.48288044556176	0.143837996331915	0.19643201832134	-5.58562462627463	-0.888984143679632	5.4227328588087	-1.7895668255651	0.0790529692821839	0.107525973843355	-5.03929041993072	2.42371173191096	5.4227328588087	3.18940350320323	0.00235903264272764	0.00878170594524158	-1.64694696420996
72	ZEB2	-28.7339863262112	4.71063005847737	-19.7301962818527	1.47419684833772e-26	2.78049905561475e-24	46.1153470614969	4.64816015348663	4.71063005847737	4.97029953836996	6.93711230046044e-06	2.16532297824669e-05	3.48802271377277	8.25953950337845	4.71063005847737	8.23236260359538	3.76455121323039e-11	5.15348845520854e-10	15.246101897608	19.0878328530519	4.71063005847737	18.9782909135863	9.48117062593628e-26	1.20707153531451e-22	46.9733070596526	-27.2505758404971	4.71063005847737	-11.9059295313063	8.0137622662953e-17	3.94300331798153e-15	24.5067597237312	9.86453904080944	4.71063005847737	9.60847014473815	2.38780511606742e-13	2.85108969603127e-12	20.1292374821466	14.1244906159819	4.71063005847737	9.83296107494957	1.06357292969057e-13	2.40722006419966e-12	20.4970598795268
73	PTOV1	-7.35356184786586	7.14481060289974	-18.2161545945681	6.61845431992141e-25	7.17116566472336e-23	46.0940171879702	4.3768522399834	7.14481060289974	13.0377175839879	1.98451455508692e-18	1.64327485720003e-16	31.7009081257443	1.38699056061493	7.14481060289974	3.57323235724822	0.000744618001556976	0.00233927647928988	-1.21539561125364	2.96863567722442	7.14481060289974	7.22386926470809	1.65676983539961e-09	3.22026732319561e-08	11.4750770955838	-2.04999052894382	7.14481060289974	-5.06630917809369	4.92827452001663e-06	1.87242173148349e-05	3.64602930733141	3.42168241583915	7.14481060289974	8.60554375671816	9.399231578908e-12	8.45681745858463e-11	16.5513926977546	-2.75060851685223	7.14481060289974	-3.71912108196412	0.000472049577651232	0.00225296389333543	-0.293849099927294
74	ZNF398	13.2982758793384	3.65341647485497	19.2553544903153	4.74536945859769e-26	7.55181061497148e-24	45.9954568241831	-2.58645651309827	3.65341647485497	-3.82384704876635	0.000338463884792078	0.000772061515477563	0.00140720870606437	-2.30038444367855	3.65341647485497	-2.92513805259373	0.00500109000594303	0.0124264702880043	-2.37003879518223	-3.26149476060667	3.65341647485497	-3.25718082776207	0.00193431235253766	0.00553553563096264	-1.39758130912719	-3.64219941013027	3.65341647485497	-4.1980572316559	9.96200548359566e-05	0.000289811556270842	1.22983443665792	-1.17886648207269	3.65341647485497	-1.41480425491037	0.162786454752961	0.205322605778192	-5.24722782461995	-0.32887426975199	3.65341647485497	-0.201850458115565	0.840781507809431	0.893791030539038	-5.57237406239077
75	SPOP	-7.64920159181395	5.42079949481381	-18.4330385650921	3.78460679279781e-25	4.43060002122364e-23	45.7739699796384	2.90311218823866	5.42079949481381	8.50529098012133	1.36324093867418e-11	1.49296870541898e-10	16.2256024485148	1.10131865019134	5.42079949481381	2.72662462181888	0.00857780406907929	0.0199458427462217	-3.20056527643494	0.835772501406022	5.42079949481381	1.90648618515246	0.0618391536847196	0.105499460683228	-4.85151328967536	-1.67947692007323	5.42079949481381	-3.98564007484443	0.000200729705462526	0.00054561837473601	0.325617762756594	2.25594801950796	5.42079949481381	5.34789751306105	1.78875337286803e-06	5.83924778931438e-06	4.82767310686026	2.23252715254321	5.42079949481381	3.28285929088566	0.00179311444460585	0.00696524432429848	-1.40372740405433
76	FKBP4	7.61442543921335	7.59220184414489	17.9963293976041	1.17199001902733e-24	1.19367183437933e-22	45.7578663188969	0.947529689505469	7.59220184414489	2.37015585570741	0.0213298576774556	0.0340668967296354	-4.45642814539073	-1.96621016488684	7.59220184414489	-4.23132442323043	8.91413232331326e-05	0.000355011700546806	0.788052105330987	-1.31128997623319	7.59220184414489	-2.5497205839116	0.0136104306873194	0.0293070267548304	-3.82988434144324	-1.18222585344156	7.59220184414489	-2.50273770297544	0.0153375303855883	0.0272052850883346	-4.0087682352087	-0.322905554127342	7.59220184414489	-0.67279129584315	0.503908981749	0.558710317778528	-6.76928108137108	-3.77932358002988	7.59220184414489	-4.56168200543978	2.90064092123421e-05	0.000198408514323509	2.26730977399955
77	TMEM98	-11.6070729806955	6.80769244640138	-18.1593841904204	7.66723876382788e-25	8.2200870325881e-23	45.753990145264	2.91520826751325	6.80769244640138	5.77692649268537	3.72277542195936e-07	1.48925638934234e-06	6.06390419446655	9.70653137537519	6.80769244640138	17.869264316622	1.63442419454432e-24	2.16189745732908e-22	45.3268822756573	1.65342373982119	6.80769244640138	2.66626794131815	0.0100619519522719	0.022632725405011	-3.53114835968089	-0.403887378081857	6.80769244640138	-0.674235929592803	0.502997332809411	0.57323798082845	-6.69577094958008	-1.77068539050042	6.80769244640138	-2.82421668054789	0.00659761963485102	0.0111437406270245	-3.13936388321842	-0.493517633431846	6.80769244640138	-0.465433720515967	0.643466380136288	0.747457240156032	-6.2661956137424
78	BCAP29	-6.43148605602574	5.55002755781677	-18.3675029208471	4.47866479493e-25	5.08913292793157e-23	45.7503004733894	0.403448845745123	5.55002755781677	1.3763011328787	0.174329724619855	0.224866799044228	-5.92205684975026	3.49753088579353	5.55002755781677	10.6400748703196	6.08254815083902e-15	1.5221315212849e-13	23.7429605085114	-1.76676925837395	5.55002755781677	-4.56849346481203	2.83329745213177e-05	0.000142927858097881	2.21046387921753	1.22500200065141	5.55002755781677	3.59445083466614	0.000697253784217962	0.00166820056195911	-0.905081019803358	-3.49248890450984	5.55002755781677	-8.8151059364196	4.33131587351149e-12	4.12670272887881e-11	17.3119592544843	6.56476248671948	5.55002755781677	12.437623145959	1.38156376503146e-17	4.67482622818785e-16	28.6135791783358
79	FKBP9	-12.966270012124	3.71050677212621	-19.7844647234178	1.29157505412572e-26	2.5297484473597e-24	45.5728605251578	-3.47224317574024	3.71050677212621	-6.84583548804182	6.87614884368983e-09	4.06935363003957e-08	10.2134743068994	5.14723666400281	3.71050677212621	9.32381899978608	6.70807349453479e-13	1.19443581366848e-11	18.930994158911	2.97214194838241	3.71050677212621	4.60403841196845	2.50590054322006e-05	0.000128125487111929	2.48272379157072	3.97831014856175	3.71050677212621	6.91264398785139	5.34765615961329e-09	3.75278281387594e-08	10.4213121647771	0.428529117562744	3.71050677212621	0.668252293051448	0.506779180619715	0.561586982331824	-6.03402686133961	3.91229530935453	3.71050677212621	3.64722674129659	0.000591601916499876	0.00272398983704848	-0.345888902772086
80	CDH2	-21.6743247074068	6.17035650576461	-18.3795304698258	4.34223627876006e-25	5.025645056724e-23	45.5724757563204	13.0225682755359	6.17035650576461	15.1099659269193	3.46883585281026e-21	8.16370988505371e-19	37.8162718226065	-4.07460276135278	6.17035650576461	-3.94661604214852	0.000227896383173532	0.000823093851993768	0.100019093561517	1.620651212046	6.17035650576461	1.55589864192103	0.125492367171825	0.1905680273811	-5.57773250204037	12.177154983734	6.17035650576461	12.9917804161995	2.29854747415507e-18	1.66033376058648e-16	31.4519385981299	6.81632359593316	6.17035650576461	6.86164191894755	6.47913609460603e-09	3.30445674129006e-08	10.2020694494725	-7.88777059848949	6.17035650576461	-3.2709054468802	0.00185758944625919	0.00717464865762224	-1.33687206815298
81	MAP7D1	-12.3596046317448	5.31036342108509	-18.3587605274805	4.58055462802977e-25	5.12669767983332e-23	45.3653629775189	0.623375597393141	5.31036342108509	1.20562537930656	0.233144920185005	0.290397580051886	-6.13268049667725	1.84925783743897	5.31036342108509	3.18601286182809	0.00238243131972622	0.00646895840880072	-2.08409541871832	1.68999713614637	5.31036342108509	2.46847214574801	0.0167196149617124	0.0349096511654451	-3.70777629207669	0.361214868672541	5.31036342108509	0.596564315988276	0.553256296747979	0.62174946291274	-6.52692661736301	3.94649099442089	5.31036342108509	6.33838009935024	4.61852017695934e-08	2.0076665814055e-07	8.34378880572301	3.88926819767294	5.31036342108509	3.7150573764841	0.000478139232608778	0.00227812611909002	-0.207600383581613
82	PRXL2A	-11.7217745450969	7.25951035312046	-17.9078049099185	1.47732665385133e-24	1.3932011082848e-22	45.2997234308924	5.9879354121375	7.25951035312046	11.4253802060633	4.04916205759338e-16	1.51620277781576e-14	26.4383537859333	1.14210481275151	7.25951035312046	1.88115588070454	0.0652706267831357	0.112579396068795	-5.29520284136755	-0.696050926341031	7.25951035312046	-1.05308789783959	0.296924680261696	0.387466735229389	-6.38709111943118	4.19165642552623	7.25951035312046	7.00167591841467	3.82484241667208e-09	2.77069843625926e-08	10.6042738872216	3.19847225143465	7.25951035312046	5.11937279392498	4.0762960479193e-06	1.24398646251209e-05	3.7964209392078	-2.10234343041201	7.25951035312046	-1.82947256806927	0.0727742434932653	0.145056131064202	-4.79115790074306
83	RHOC	-10.7566157818252	6.8160767264751	-17.9588612304487	1.29252729226296e-24	1.2780961623008e-22	45.2825552141982	-4.85148999819136	6.8160767264751	-9.79850616969168	1.20371353926801e-13	2.22098231837767e-12	20.8295598625015	4.99592513431329	6.8160767264751	9.49768179495742	3.56595799917094e-13	6.65681973022745e-12	19.7696517555352	1.27493034606807	6.8160767264751	2.08131408622259	0.0420934732163134	0.0766533210634993	-4.75712037339663	5.5589597055956	6.8160767264751	10.5305312279241	8.92940063115294e-15	2.35002442967165e-13	23.4071812731436	-5.30471456668306	6.8160767264751	-8.14083286700022	5.29796569039396e-11	4.08167780307583e-10	14.9061823005426	9.08300516072265	6.8160767264751	11.1161456117773	1.16621936724962e-15	3.29942895984371e-14	25.1681588735093
84	PDLIM7	-11.0812560660506	6.66690831908437	-17.9722998888615	1.24791019916579e-24	1.2460750371082e-22	45.2545587248401	3.13146284969411	6.66690831908437	6.25829534768535	6.2302422237296e-08	2.93501466460157e-07	7.85061331889999	2.63787192578221	6.66690831908437	4.65451950528853	2.10362274741534e-05	9.69475008254535e-05	2.25527043955992	2.64266569147367	6.66690831908437	4.29472079948913	7.20537413831536e-05	0.000320746222022473	1.13797102563581	-3.18120415243019	6.66690831908437	-5.26291591512099	2.4325850088023e-06	9.79283727851835e-06	4.39897805935271	4.62019219595436	6.66690831908437	7.78096074157393	2.0388984196622e-10	1.39839598681882e-09	13.5590625599688	1.23026755557641	6.66690831908437	1.17931839467561	0.243369090172682	0.368472451822322	-5.65993967336565
85	ZEB1	-28.111066773103	3.97629489113186	-20.4670608419874	2.50472561290812e-27	6.71332378091295e-25	45.1743159342895	8.79824946508551	3.97629489113186	11.0011590144739	1.73352010924133e-15	5.27041860078297e-14	24.8354235265529	3.12953980563667	3.97629489113186	3.34387279166701	0.00149566200843699	0.00431783377435677	-1.42544321931727	3.48157261094949	3.97629489113186	3.55727906885078	0.000782234553697901	0.00252361701913624	-0.795722685225448	-18.1525609348693	3.97629489113186	-10.8312614479275	3.12304776792808e-15	9.16113760623221e-14	21.9832766850223	16.4802122109258	3.97629489113186	19.5052821468	2.5578760232528e-26	3.02929852288718e-24	47.7434807868302	14.3740536153749	3.97629489113186	11.8009065745571	1.13894154312295e-16	3.56926757437146e-15	26.4185731245064
86	ZNF521	-19.9072608863925	4.54598499448235	-18.7916547638504	1.51770617235147e-25	1.98177402120509e-23	45.0856233427172	10.7622855620854	4.54598499448235	14.5482743223137	1.83925002350049e-20	3.60245413256778e-18	35.9207179081395	0.568599303437394	4.54598499448235	0.640926932423346	0.524243074633619	0.616916893719631	-6.36636941759754	3.20283067529873	4.54598499448235	3.45139997334466	0.00108177087453022	0.00333469623398618	-1.16460753755369	-5.83858340439363	4.54598499448235	-5.66932186888756	5.53239312852672e-07	2.5427537912475e-06	6.03430855040474	0.533905596040098	4.54598499448235	0.530482971536465	0.597921567980191	0.647097138442062	-6.30791109346962	10.6782231539245	4.54598499448235	7.91746851259513	1.22200400129272e-10	1.96001744144353e-09	13.7592661439347
87	TKT	6.15109461737385	9.11272668657918	17.6653591714645	2.79698617657979e-24	2.49888633407589e-22	45.0382497040994	0.10604199095901	9.11272668657918	0.324543673321699	0.74676281099981	0.789063100947511	-7.32171661267419	-2.16263571596657	9.11272668657918	-5.6964371076657	5.00749497438175e-07	3.27982870186997e-06	5.6497146811959	1.40406591636543	9.11272668657918	3.48243199627256	0.000984230708667252	0.00307874378617198	-1.63755858476209	-1.99007147873284	9.11272668657918	-5.15130589038024	3.6353043762317e-06	1.41860440888582e-05	3.73088615995671	-0.260756451108405	9.11272668657918	-0.668002589669091	0.506937334234014	0.561701125889189	-6.98906692157503	-3.24773887889046	9.11272668657918	-5.29897782146854	2.13539575310967e-06	1.89616440674995e-05	4.58901800272107
88	ATXN7L3B	-8.44640849049051	6.39843424883744	-17.9091197465771	1.47224622017513e-24	1.3932011082848e-22	45.0363937848532	2.83709000587133	6.39843424883744	7.18750515394956	1.89989351538233e-09	1.27221666365346e-08	11.3185339511499	0.665460232207155	6.39843424883744	1.45415772513346	0.151609596247262	0.228387074135961	-5.81289441400387	1.62326481294341	6.39843424883744	3.25923020753601	0.00192266913272253	0.00551305887296705	-1.89829149611497	0.550743638303218	6.39843424883744	1.19670668228662	0.236575512778421	0.302627681191687	-6.13011955547383	5.76117029246991	6.39843424883744	12.7251223439854	5.42155022033981e-18	1.38739922095882e-16	30.622400867417	-2.9913204913045	6.39843424883744	-3.47020482052218	0.00102162047868804	0.00433550190643235	-0.924431177663457
89	CHD9	-11.0686354084119	6.50920064347881	-17.9102228769304	1.4679974894888e-24	1.3932011082848e-22	45.0091541718471	3.11131806776057	6.50920064347881	6.20050215656734	7.73030039134994e-08	3.54973442226777e-07	7.6652089894435	5.48029426839804	6.50920064347881	9.87067930888131	9.28931929418155e-14	1.93876469285326e-12	21.1092270483764	4.1584313528714	6.50920064347881	6.95727196489949	4.52075804905142e-09	7.8842330016419e-08	10.5402354480464	-3.54004242106848	6.50920064347881	-5.78909136757098	3.55940083787915e-07	1.70119650557481e-06	6.29621472604826	3.92730984988458	6.50920064347881	6.72227224912443	1.09435474399038e-08	5.36381283327336e-08	9.66303380513938	-2.06867570943426	6.50920064347881	-1.88980308113611	0.0640814822716347	0.131560148545978	-4.56077186878095
90	KALRN	-16.387692452496	3.74442866156593	-19.6800702636036	1.666148208764e-26	2.97714377302831e-24	44.9998699889992	-11.6243260922903	3.74442866156593	-18.2311406747758	6.36673942134423e-25	4.18860488811584e-22	44.1574075509754	1.40537207335081	3.74442866156593	2.03035403790034	0.0471880869682697	0.0858080103145558	-4.41180921586355	0.210872435640508	3.74442866156593	0.26216118188041	0.794180718356245	0.840736993707344	-6.19498044501482	4.17436557207519	3.74442866156593	6.08689578015899	1.18040388988909e-07	6.24216698780914e-07	7.50136777067089	12.1094962789614	3.74442866156593	18.9539814441343	1.00783883932034e-25	1.08050932405028e-23	45.8273703943947	10.1119121847583	3.74442866156593	9.83431390769703	1.05841928887145e-13	2.4008909704133e-12	19.5369291250406
91	MAPK10	-21.4546517697222	4.25146815039228	-19.0634304722517	7.658552979221e-26	1.13046901584588e-23	44.9333275061011	13.3724083813695	4.25146815039228	15.4339293224645	1.34861645658905e-21	4.16232079101801e-19	37.872706376824	2.15818187924409	4.25146815039228	2.11699229241616	0.0388176077029478	0.0729307017993955	-4.27265710765767	-0.574819589752581	4.25146815039228	-0.525106404374277	0.601628580230194	0.68054054749495	-6.19793162183661	2.49176970878819	4.25146815039228	2.4726766976161	0.0165441807202147	0.0290772184012746	-3.53797732686401	12.0778579173886	4.25146815039228	12.797828352402	4.28665904401217e-18	1.10811224272244e-16	30.2501821423136	-8.07074652731551	4.25146815039228	-2.94964038177296	0.00467180555485956	0.0154689010325893	-2.10710324118773
92	LEF1	-24.3191895568801	3.92697789571107	-20.0840317794384	6.25472677868626e-27	1.44782709638453e-24	44.9028944218307	3.9816068569021	3.92697789571107	5.60068459611522	7.11714582225443e-07	2.67089647014228e-06	5.72413856326953	14.4201296362546	3.92697789571107	19.366695078205	3.60067099033632e-26	7.05246808395681e-24	47.5962878679707	8.03496661773723	3.92697789571107	9.69446057581033	1.75060284097058e-13	1.12137672548965e-11	20.315369374834	-5.2024004818858	3.92697789571107	-5.67435815557678	5.43094314967129e-07	2.50290298549331e-06	6.05526979892042	-5.71630810880545	3.92697789571107	-5.43991109918355	1.28048204370276e-06	4.27036988052147e-06	5.25185836425764	8.80119503667743	3.92697789571107	6.80173308834253	8.1170231381337e-09	1.04120756501123e-07	9.79406035654113
93	FBN2	-21.2692669863904	4.28575669283303	-18.8561600844331	1.28943550030216e-25	1.75105340941034e-23	44.8922999210394	6.97723858056596	4.28575669283303	8.26048477627764	3.38970890176219e-11	3.37150245746562e-10	15.3425472551437	9.83081532764779	4.28575669283303	10.8867375842943	2.57592623011639e-15	6.94069012003581e-14	24.4117554293743	2.26748837727412	4.28575669283303	2.17458191876962	0.0339987088631581	0.0639595215683904	-4.18098782049083	11.9592157304153	4.28575669283303	13.288665551026	8.93723062701279e-19	7.34078176904236e-17	31.9149574812477	-17.8471320608682	4.28575669283303	-9.48131540535573	3.78401505483342e-13	4.36468780673594e-12	17.8403573903516	8.08164103135548	4.28575669283303	5.01427899279842	5.93293743821494e-06	4.77683539985923e-05	3.78052286610092
94	CAPN2	-15.6643468778176	5.62367911266721	-18.1053881965659	8.82131144568147e-25	9.35886011190269e-23	44.8643561129043	-0.190918276447753	5.62367911266721	-0.296712431628783	0.767808409316498	0.806614610509389	-6.86355452595197	5.052702072795	5.62367911266721	7.19393529535886	1.85444409847292e-09	1.88310200826986e-08	11.4164161956906	-1.380151478536	5.62367911266721	-1.62618631912782	0.109650899831676	0.170165231568737	-5.35580520362124	5.0211031128087	5.62367911266721	7.15612696915661	2.13817890742465e-09	1.66112526103128e-08	11.2809295332947	-3.72998234224324	5.62367911266721	-4.20153354185731	9.84714903667307e-05	0.000232213968368871	1.02365412829608	10.8915937894409	5.62367911266721	10.418810159532	1.32284672370569e-14	3.35989872342703e-13	22.6892178664108
95	HAGHL	14.7879002875409	4.27391612164264	18.2650171859387	5.83294250045085e-25	6.4574477572926e-23	44.6641948706241	-2.25161518684662	4.27391612164264	-2.8353289026382	0.00640117043886191	0.0114298599088023	-2.78467704413304	-0.196056276275091	4.27391612164264	-0.217195463884021	0.828863112254123	0.876723522516175	-6.38344751532008	-2.7082008890689	4.27391612164264	-2.44395803587324	0.0177762838325164	0.0367617159054172	-3.44108697087803	-5.55537572527265	4.27391612164264	-5.28962825262238	2.20881775373319e-06	8.95657467713504e-06	4.74211967776447	-2.09553435232646	4.27391612164264	-2.16099080384768	0.0350859698786197	0.0513803886719974	-4.12844334319678	-1.98111785775121	4.27391612164264	-1.01827266570936	0.313025569289524	0.445585663621775	-5.22191348584057
96	VSIG10	16.1807721816103	4.34057819627408	18.2352257015905	6.29982613054513e-25	6.89932571393572e-23	44.6117673269653	-0.534090012261751	4.34057819627408	-0.610346390640703	0.544156809216337	0.605576606410445	-6.32862870262161	-5.72283160957702	4.34057819627408	-5.24277280886503	2.61596711460606e-06	1.46715997038892e-05	4.58069196453004	-5.46616108809756	4.34057819627408	-4.17704855015552	0.000106842750282671	0.000449295380523951	1.1704411325081	-0.12857909939616	4.34057819627408	-0.122141444085575	0.903234070519247	0.924938569096976	-6.33181012132231	-4.05970641960673	4.34057819627408	-3.49124345304383	0.000958096873769022	0.00190329952395894	-0.874360853858104	-0.26940395267107	4.34057819627408	-0.129701539639084	0.897277743542908	0.934185446815483	-5.70352153770575
97	NCOA6	-10.0732043057431	3.99163472127718	-18.6729277015455	2.05091575955079e-25	2.54738744036888e-23	44.4410898872993	1.75737070422525	3.99163472127718	4.03205056937054	0.000172477333991258	0.000414800861086414	0.540488935815535	1.17443520289474	3.99163472127718	2.29441228817857	0.0256252723545629	0.0513463306966798	-3.91066403968595	1.57642823617187	3.99163472127718	2.86456334457148	0.00590988134109379	0.014382829500368	-2.56280284633204	1.70337251690817	3.99163472127718	3.29366487030624	0.00173665650036706	0.00380957278833482	-1.49379533743434	2.66934410705796	3.99163472127718	4.93330725723389	7.90959134593133e-06	2.29513355721683e-05	3.53606727339064	1.19225353848511	3.99163472127718	1.13518375360648	0.261241916192118	0.388771028114659	-5.14064328029345
98	ZKSCAN1	-10.2462382311463	6.21111604751395	-17.6767491828311	2.71398010986484e-24	2.44618472734278e-22	44.3604912925975	1.85499542121362	6.21111604751395	3.92441119347672	0.000244902337948503	0.00057327747920145	-0.131941222982432	-1.56459741130709	6.21111604751395	-2.78859304533473	0.00726555845775185	0.0172092355563262	-3.16479817575158	6.03791016401897	6.21111604751395	10.5296294077897	8.95772127482206e-15	7.93342532035328e-13	23.3809423153546	0.332117762619154	6.21111604751395	0.603513195411306	0.548658794810064	0.617195695288325	-6.64696880733341	4.74752501533892	6.21111604751395	8.67497730747684	7.26849584073044e-12	6.62754074644937e-11	16.8412374030503	-1.16171272073725	6.21111604751395	-1.15718068616491	0.252220602175901	0.378303383285014	-5.60288308000834
99	MAGED1	-10.2136756331513	6.22853930109262	-17.6021964200221	3.30638607214969e-24	2.92830801259518e-22	44.1633756015142	2.7468241439719	6.22853930109262	5.79789530248387	3.44561562614837e-07	1.3887453562454e-06	6.22801818859904	6.26189748453499	6.22853930109262	12.0768416830267	4.53631092388294e-17	1.58770882335903e-15	28.5703099550336	1.70501911407443	6.22853930109262	2.94673055221194	0.00470982756568607	0.0118766015737838	-2.73658517922833	4.13270150159807	6.22853930109262	7.81620697824917	1.78632216303606e-10	1.7245204957841e-09	13.6978419925603	1.34916377823891	6.22853930109262	2.34963275944906	0.0224250683074891	0.0340928479433221	-4.15094010672663	-5.981930389267	6.22853930109262	-4.93099029853512	7.9747694852524e-06	6.24792516979197e-05	3.53284992704544
100	UBE2J1	-13.1908983313973	4.83951230505616	-18.0785779897012	9.45838591884765e-25	9.82996536565952e-23	44.151391727483	-0.50806299336317	4.83951230505616	-0.899481588268446	0.372334060693754	0.437547295277014	-6.32925009079477	1.60643861322945	4.83951230505616	2.46717685600599	0.0167739978494088	0.0356071630046329	-3.72503794570734	-1.50851631427455	4.83951230505616	-1.90038886254602	0.062650819293966	0.106687609849364	-4.68048379793396	2.60132367744443	4.83951230505616	4.03557391000618	0.00017049696624619	0.000471493782573294	0.503389123748655	-0.404946963532628	4.83951230505616	-0.546469942170828	0.586962418491321	0.637404012403679	-6.3336035849586	11.4046623118938	4.83951230505616	12.1975329093039	3.04205512735854e-17	9.93055495902138e-16	27.7422973535876
101	WLS	-18.0042620348852	5.51675608709644	-17.8711231747477	1.62647147609268e-24	1.50596472581854e-22	44.1466276386012	13.1191835192874	5.51675608709644	18.5809686446305	2.59207222861733e-25	2.20002130403895e-22	46.9095802261936	5.59311408551878	5.51675608709644	7.12480477863189	2.40584415566259e-09	2.40702580799838e-08	11.1610260452624	1.57582635120056	5.51675608709644	1.78563822415116	0.0796948763012714	0.130266781436118	-5.16650211732811	3.8760620958127	5.51675608709644	4.78173051889845	1.3494727742317e-05	4.66702214110353e-05	2.78937988475951	-7.73146697532876	5.51675608709644	-6.93752856979106	4.86952849564851e-09	2.5239769836224e-08	10.5463749372535	1.57154295839448	5.51675608709644	1.05925262322054	0.294134062764776	0.424688889886481	-5.67340241674969
102	RCN1	-10.1180734626376	7.1296472241384	-17.4091807733595	5.5277169217647e-24	4.61473744657159e-22	44.0131274968837	5.72100357175058	7.1296472241384	12.0023964411197	5.80963093128563e-17	2.96389209268862e-15	28.3654682418709	1.05230623171623	7.1296472241384	1.92585233287142	0.0593202287235733	0.103703489452385	-5.18793163446107	3.66454464498812	7.1296472241384	6.34885098002294	4.441110006596e-08	5.68250068055029e-07	8.25002015006009	1.85911718636352	7.1296472241384	3.38807166160511	0.00131004120820631	0.00295520923711657	-1.72830510151095	-0.264808710906598	7.1296472241384	-0.440923747578793	0.661003848225483	0.705546446675387	-6.80815372879352	-1.91408946127429	7.1296472241384	-1.80467773178371	0.0766240931662856	0.151272802655286	-4.78662463626749
103	PIK3R1	-15.653222357366	5.03153630899474	-18.0218891175511	1.09637016854065e-24	1.12793234005925e-22	44.0058825825897	0.785141410170165	5.03153630899474	1.19995347519973	0.235322406720643	0.292716012756442	-6.04247779868637	1.03523688526976	5.03153630899474	1.34307262789245	0.184787838166695	0.268329645242057	-5.72369029182492	6.58357610362127	5.03153630899474	8.51413856356314	1.31919434205106e-11	4.90364758167521e-10	16.2497823601459	6.31526089180179	5.03153630899474	8.79066153253538	4.74012143560602e-12	6.52407254346586e-11	17.2552282144739	3.76987307660444	5.03153630899474	4.86846738911389	9.94698524272464e-06	2.84179648519356e-05	3.2056839573896	-2.83586601010144	5.03153630899474	-1.84653957487387	0.0702198741455816	0.140811988668892	-4.3791334969475
104	MZT2B	-7.15054199777476	8.3429518519493	-17.3023000148028	7.36009809102066e-24	5.77491921115069e-22	43.9945557769292	2.70327104306273	8.3429518519493	7.74653611673113	2.32013131333583e-10	1.88291134871119e-09	13.1914438121357	2.52358779250854	8.3429518519493	6.34697612127321	4.47236983899402e-08	3.57263425961993e-07	8.06840886485492	1.31592135555581	8.3429518519493	3.0541892685817	0.00348092022513353	0.00915629454880811	-2.75444258359338	0.4220180067109	8.3429518519493	1.03245048372308	0.306398814780779	0.37795266189175	-6.61867443406952	0.446130829812105	8.3429518519493	1.04622350186294	0.300053366911434	0.353632784981002	-6.57294086123665	-0.260387029875325	8.3429518519493	-0.39509324097332	0.69430868364246	0.785987989651934	-6.61205182565585
105	XPA	-9.56467929858155	4.76694634510758	-17.9544123836356	1.30765182883173e-24	1.28061864198569e-22	43.916183112335	2.52255828932456	4.76694634510758	5.86055036978961	2.73359853177281e-07	1.1208414269769e-06	6.61613594286893	3.02335917215291	4.76694634510758	6.17778898938149	8.41370327915447e-08	6.31958465325872e-07	7.79740616216943	3.0373489612756	4.76694634510758	5.69673779424511	5.00195989475516e-07	4.5979207155308e-06	6.11099279739621	-0.36970907964308	4.76694634510758	-0.716574340729055	0.476681431173317	0.548021465636309	-6.27232384669529	3.52697543260603	4.76694634510758	6.90666596110642	5.46933533340801e-09	2.82051546181066e-08	10.435879237494	-2.17585347713446	4.76694634510758	-2.00416328749057	0.0500079027403164	0.108115153769926	-4.02722307311405
106	RBPJ	5.61318152275477	7.1531921318701	17.3134010149712	7.14405088905452e-24	5.7747744686524e-22	43.8977969197658	1.89915622956181	7.1531921318701	6.28520855583247	5.63427572597786e-08	2.69200021573104e-07	7.92292446509202	-3.14880405978908	7.1531921318701	-8.77770527704104	4.97232037233679e-12	7.7792754212366e-11	17.1961293197549	0.378143546956606	7.1531921318701	0.989708174141668	0.326669229377996	0.41840116966988	-6.3737574111217	-4.24745892546814	7.1531921318701	-11.4425863351989	3.8190540579675e-16	1.48462082367935e-14	26.4862584707809	3.37552093881925	7.1531921318701	9.64418558404971	2.09877267211243e-13	2.52373077514346e-12	20.3044768933444	-3.86973925283521	7.1531921318701	-6.04658222512888	1.37134717189637e-07	1.494204028228e-06	7.35845503211372
107	TSPAN3	-11.0583035732106	6.81392306314462	-17.37799977458	6.00847704689582e-24	4.97531209127105e-22	43.8101203630682	5.78845767299994	6.81392306314462	11.2892792809861	6.44055973774091e-16	2.23119390914596e-14	25.9931170637867	-0.870283638519789	6.81392306314462	-1.45094504552413	0.152498923804242	0.22942415641746	-5.88951263733053	2.40322692539354	6.81392306314462	3.83454660336717	0.000327072152277317	0.0011888757569395	-0.331084180662892	2.50421711961548	6.81392306314462	4.2388303617531	8.69293558646078e-05	0.000256110931293327	0.890831459620023	4.60819529008799	6.81392306314462	7.68648822800663	2.90699043916941e-10	1.94021609586766e-09	13.1936149375092	-3.37550979636655	6.81392306314462	-2.8275120936805	0.00653878777787326	0.0203974130222478	-2.60354957650313
108	C4orf48	-13.6160348884616	7.42839627145493	-17.2489010143496	8.49581718966423e-24	6.5552953088432e-22	43.614042679488	4.56291897028273	7.42839627145493	7.43283655662746	7.54453327768361e-10	5.48864795951483e-09	12.1103019483305	2.54048409933652	7.42839627145493	3.6441036382085	0.00059740243596302	0.00192609807226444	-1.0635855005491	1.63428449434882	7.42839627145493	2.11763567085852	0.0387606362470292	0.0715175869884044	-4.79180497906092	-1.28160294796708	7.42839627145493	-1.7555009969659	0.0847652400545986	0.123386304124065	-5.49919508300365	7.58145440131184	7.42839627145493	10.8818535984425	2.61993669398394e-15	4.42521645575894e-14	24.6075143069384	-1.42150412885126	7.42839627145493	-1.10831756263924	0.27256813934422	0.401171459424983	-5.86431196875005
109	ZNF503	-28.4631014361065	5.14701002290204	-18.5112480940584	3.0974062843302e-25	3.71142153010625e-23	43.4747759836726	10.2609859976251	5.14701002290204	12.1647183777011	3.39054111583175e-17	1.82712493464267e-15	28.8258357197448	13.250613530408	5.14701002290204	14.7893251497429	8.94722425942213e-21	6.11593819343721e-19	36.7205351259577	2.68497851867946	5.14701002290204	2.60139156192196	0.0119163402789011	0.0261850972471646	-3.46549499530651	-1.11663903615292	5.14701002290204	-1.07324527428631	0.287867165989908	0.358692733648337	-6.07190893856672	1.81263465591131	5.14701002290204	1.67452632048101	0.0997290143285964	0.132535868547959	-5.24666300463936	1.57052776963543	5.14701002290204	0.907950088495895	0.367882477018064	0.500652462376936	-5.76036746116207
110	CNN3	-8.91798932399712	7.7408184069513	-17.1343816992886	1.1569462902926e-23	8.63159302987424e-22	43.4469787017179	4.24346536299536	7.7408184069513	9.82976011797096	1.07586803395541e-13	2.00323874329722e-12	20.8795014528916	0.990440274222194	7.7408184069513	1.98486691202183	0.0521772341034312	0.0931018096256914	-5.15904818823386	1.92895094934904	7.7408184069513	3.5943111825772	0.00069755590026097	0.00228811814626666	-1.15504568940875	-0.00890620026382738	7.7408184069513	-0.0176527153058767	0.985980054498059	0.989574975863493	-7.06074634149208	1.48496770916067	7.7408184069513	2.8240929524366	0.00659983800533795	0.0111456392114686	-3.27049099291082	0.27907122853367	7.7408184069513	0.330835858301013	0.742030876577477	0.823102269698777	-6.50893406035842
111	NEDD9	-19.553656427636	3.1148440076046	-19.6861551268616	1.64155420027345e-26	2.97714377302831e-24	43.3426874770385	1.01739876604039	3.1148440076046	1.41517169929528	0.162679218660176	0.211031814906193	-5.38978777054539	7.98200440912333	3.1148440076046	10.0990874332172	4.10641287267288e-14	8.99436884046737e-13	21.324437074506	6.1442552243493	3.1148440076046	7.1710103477171	2.02164176192545e-09	3.84867688695528e-08	11.2315837651689	5.64103629177066	3.1148440076046	6.95957110352759	4.48180108255386e-09	3.194341779273e-08	10.5316246905427	-12.0531082772727	3.1148440076046	-9.21670687212418	9.9151296868527e-13	1.06300627221679e-11	16.7367544934756	10.822070013625	3.1148440076046	8.05060775497635	7.42317647032853e-11	1.21356424318292e-09	13.0926866579827
112	SKA3	13.6766297620527	4.59050574218239	17.55426090461	3.75510539695457e-24	3.24116512440528e-22	43.3338397399819	1.93968097786751	4.59050574218239	2.57797534732827	0.0126587458034635	0.0212595084081457	-3.46573482336093	-0.982198574795577	4.59050574218239	-1.12649040102182	0.264869685121848	0.360125182614607	-5.84575363515031	1.47805675405944	4.59050574218239	1.50542314984449	0.137961205756379	0.206122177002892	-5.25543801855232	-4.50686807686988	4.59050574218239	-4.57751569914415	2.74644247934665e-05	8.90560861259015e-05	2.36936256458301	-7.55746652007326	4.59050574218239	-7.40142501891967	8.49120049528809e-10	5.11733000263368e-09	12.1361451390527	-4.04783432224099	4.59050574218239	-2.08240257637454	0.0419900821451582	0.0938900080457599	-3.82288651330718
113	FARP1	-11.7929859886148	5.90253363619465	-17.3498081750519	6.47962376341392e-24	5.32217484115893e-22	43.3080772791152	-1.76575860881116	5.90253363619465	-3.26087180739005	0.00191339037191483	0.00376577409429034	-2.0190591882775	5.59055109221597	5.90253363619465	9.40675616477264	4.96054381667529e-13	9.00590708963241e-12	19.4700983085333	3.40162998213842	5.90253363619465	5.20550686210815	2.99185857853124e-06	2.13839155244496e-05	4.27845277513197	4.19795585572101	5.90253363619465	6.93950403020119	4.83345439712897e-09	3.41866201630268e-08	10.4909563193151	-0.681394591960979	5.90253363619465	-1.02454160460791	0.310083578425177	0.364057780548752	-6.205372335964	1.05000225931158	5.90253363619465	0.941435543135662	0.350615790576058	0.485061372862965	-5.79257699171918
114	ABHD14A	-11.9015596761501	4.51402344921336	-17.8858744503002	1.56473808765562e-24	1.46209701126353e-22	43.3023476592992	3.50952700948525	4.51402344921336	6.89777510036616	5.65543673016571e-09	3.41235918819537e-08	10.3845720653233	2.84449255986999	4.51402344921336	4.97633871946609	6.78991843768915e-06	3.47339624750698e-05	3.5875114299422	-0.711510737582127	4.51402344921336	-1.10981850276678	0.271926404803152	0.360152201940195	-5.85620659027066	0.723635140926843	4.51402344921336	1.15601222454932	0.252694125901672	0.319991256037365	-5.82012405154062	7.52979332813601	4.51402344921336	13.0002638922169	2.23698187128194e-18	6.12463988145339e-17	31.0524431913208	-1.99437762468584	4.51402344921336	-1.54529283920384	0.128034584430296	0.225260363175431	-4.71805408887206
115	ARMCX3	-9.23828522723431	6.3235349873665	-17.2031345086742	9.61005273738472e-24	7.35927722783935e-22	43.2076184068855	-0.0502380521169243	6.3235349873665	-0.112320737474249	0.910979765152309	0.93043811753673	-6.96041645634679	-0.137545392436685	6.3235349873665	-0.267995081973306	0.789709875651059	0.845968962699004	-6.81045785101447	0.888598439316304	6.3235349873665	1.52431985492536	0.133182844619772	0.200216571579687	-5.5771527501986	-1.09773493840068	6.3235349873665	-2.09417465374953	0.0408859370226736	0.0650507500166289	-4.69386123447665	6.52703649810633	6.3235349873665	12.926084526201	2.83725769369453e-18	7.64483323023249e-17	31.246829893145	3.10816867276597	6.3235349873665	3.62975321926633	0.000624761513157461	0.00285345112623711	-0.535760202512814
116	KIFAP3	-15.691058718738	4.8253330045074	-17.782473813877	2.05326683462628e-24	1.88401105501519e-22	43.1988221148575	-5.80714899655566	4.8253330045074	-8.91366319075425	3.01238722842074e-12	3.83035754325409e-11	17.7048909402298	6.86844070605208	4.8253330045074	10.353205327061	1.66738894919285e-14	3.85087447789778e-13	22.7489738219145	0.831017635302628	4.8253330045074	0.978197038934069	0.332278076550027	0.424410861507653	-6.01180745782437	-0.884561121357328	4.8253330045074	-1.17106091470551	0.246644164139069	0.313577682156587	-5.91385548922352	9.53251741799501	4.8253330045074	13.5246645713679	4.25187277621367e-19	1.32028427517489e-17	32.8262582895168	5.15079307730129	4.8253330045074	4.1565667571968	0.000114371565200676	0.000659611773255314	1.11166025476567
117	MIB2	8.59308661258618	4.85125515399592	17.4148456050855	5.44465824969198e-24	4.5829623366209e-22	43.1983741037889	-1.45250307873042	4.85125515399592	-3.11271540203045	0.00294484996264752	0.00559994340357823	-2.20349930795886	-0.259909762061588	4.85125515399592	-0.471400816809435	0.639227003501825	0.721627912953457	-6.40916436228448	-3.65223974309475	4.85125515399592	-5.76437158070116	3.89918128579909e-07	3.71151041082839e-06	6.36966980039907	-0.777918694915154	4.85125515399592	-1.38788390037983	0.170792951785694	0.227955210842261	-5.5515821131415	1.1581456745893	4.85125515399592	2.05131340741652	0.0450315136290972	0.0646162251778466	-4.48017693435917	-3.60866100837356	4.85125515399592	-3.192915977175	0.00233502126927949	0.00870823567470215	-1.50638561543676
118	GNG5	-8.53574377649589	9.09801857918393	-16.9443910734241	1.93720358151966e-23	1.37974954390054e-21	43.1022367662287	1.04430937050737	9.09801857918393	2.45620817716399	0.0172409532320271	0.0280913627688684	-4.49929515219872	3.02665612120193	9.09801857918393	6.32720446584324	4.81565867757794e-08	3.82884337479558e-07	7.90784246816386	1.76624786412647	9.09801857918393	3.39288582000921	0.00129119708998595	0.00389539169475914	-1.92593864596526	0.171562955862344	9.09801857918393	0.347753629836082	0.729358198600781	0.778833429728345	-7.19845838598832	-0.279034394868342	9.09801857918393	-0.53148449784542	0.597232219396461	0.646488484913694	-7.06541633034322	2.8060018596661	9.09801857918393	3.90051189474126	0.000264570982317001	0.00137412312845418	-0.137884124566108
119	RGL1	-17.312650747149	3.08194416742647	-19.6454370968961	1.81343372212635e-26	3.18445214825118e-24	43.0990075143664	-4.03233977622779	3.08194416742647	-6.58096172196106	1.86077571958331e-08	9.97473721260842e-08	9.25406147709188	9.00418106496161	3.08194416742647	13.8612944512653	1.4918068262561e-19	8.25763724207523e-18	32.8455746632038	1.55966935296456	3.08194416742647	1.89747287877773	0.0630421790656563	0.107239633588503	-4.43018570170052	-7.92173357403259	3.08194416742647	-9.14745030023973	1.27724449400385e-12	2.03261487053582e-11	17.6149169628592	-2.13246602262128	3.08194416742647	-2.49381987349127	0.0156869150057749	0.0246218568860868	-3.24489945748828	20.8353397021045	3.08194416742647	24.9945372497926	1.25660770611111e-31	5.33272895280902e-29	51.8129218662211
120	TET2	-16.0820592835423	3.22768366558439	-19.084486899858	7.26547740493693e-26	1.09564857941235e-23	43.0979590388035	-0.747971219227628	3.22768366558439	-1.15810222471313	0.251847593593101	0.310653716936628	-5.71513393070361	1.70909827952623	3.22768366558439	2.30864170248701	0.024763971085364	0.0498460564238008	-3.76242367604951	2.8532411703805	3.22768366558439	3.31142436391192	0.00164749773962691	0.0048231573665134	-1.28792185928683	0.571981822930559	3.22768366558439	0.743627512019067	0.460280189822913	0.532661485438742	-5.93804158730084	5.84295879211111	3.22768366558439	7.72269905017072	2.53735617818364e-10	1.71372497843504e-09	13.1835751512198	5.85275043782149	3.22768366558439	4.31858474850076	6.64843962831359e-05	0.000410141475556474	1.43863357241429
121	DNMT3B	17.3097028243801	6.46168766669102	17.0346612462231	1.51564419847267e-23	1.10483420616454e-21	43.0628721973968	0.123997042526267	6.46168766669102	0.122616173645346	0.902859879811956	0.923441240799837	-6.92971739171764	-6.45384892059981	6.46168766669102	-5.29891447428477	2.13588502520872e-06	1.22488676699047e-05	4.58720137607974	-0.874219867232433	6.46168766669102	-0.648208326169852	0.519558678873318	0.604231535679846	-6.45716093748106	-9.37711620894295	6.46168766669102	-6.590309141908	1.796615198143e-08	1.12424118573754e-07	9.28207033852953	1.13812420024932	6.46168766669102	0.970361701120196	0.336132234412739	0.390722073441423	-6.33704274906277	-1.86663907038048	6.46168766669102	-0.890029883831788	0.377342810741912	0.509442805859806	-5.8531053715287
122	CHD3	-13.8769806869285	4.87963491708452	-17.5417914015189	3.88165215781841e-24	3.32223758213282e-22	42.8403995362545	0.24979660558948	4.87963491708452	0.411565352437952	0.68226423472806	0.732615838767031	-6.64302400038298	9.6963385538915	4.87963491708452	15.1790460586332	2.832929395216e-21	2.23669658064147e-19	37.6037715811603	3.50684414610911	4.87963491708452	4.75331879269914	1.49067185915279e-05	8.31461822862602e-05	2.85128568857111	-3.97346478784023	4.87963491708452	-5.33319950802344	1.88661284022501e-06	7.76369768795626e-06	4.8318029257958	5.32073451492137	4.87963491708452	7.37590757955498	9.34712840078271e-10	5.59016457791966e-09	12.1367343241185	-0.92326834574277	4.87963491708452	-0.654818556011717	0.515325366171255	0.637351409162627	-5.7277012049199
123	NUCB2	-10.4194674318055	5.87354287718057	-17.1337490019372	1.15892636374059e-23	8.63159302987424e-22	42.8259487847874	3.49333252147645	5.87354287718057	7.13092871081517	2.35099987191829e-09	1.54583174276874e-08	11.1445020518379	1.96874817296237	5.87354287718057	3.47643984492205	0.00100238861820524	0.00305029222480441	-1.31029019138211	-0.267920228013182	5.87354287718057	-0.417009873294935	0.678301217662767	0.74605808875759	-6.58143199495168	3.91462057907226	5.87354287718057	7.05044105043615	3.18328442654217e-09	2.3613803266083e-08	10.9015306159688	-2.55487020053145	5.87354287718057	-3.8618151988133	0.000299681917865047	0.000649002835095792	-0.0527380528200947	3.86555658683907	5.87354287718057	4.04001083241154	0.000168034336490909	0.000915203057304764	0.708056205340398
124	ESD	-6.13139077313713	7.57448715520802	-16.8976753771606	2.20030847080586e-23	1.5455270189764e-21	42.8093124741159	3.0026850839264	7.57448715520802	9.74316369706857	1.46886917086049e-13	2.62463728161652e-12	20.5873658519885	0.461215800222462	7.57448715520802	1.30280391889897	0.198092997863896	0.284807620446609	-6.20688505975798	3.13037702710155	7.57448715520802	8.31558599812322	2.76041181095876e-11	9.23530857267902e-10	15.4869605244443	-3.11700624493762	7.57448715520802	-8.37191877509979	2.23809643663271e-11	2.62313143925249e-10	15.6926364939153	2.21249163000534	7.57448715520802	6.01704272195289	1.5304514024855e-07	6.02770592974276e-07	6.9902705311791	0.441627476818979	7.57448715520802	0.742696991562939	0.460838888072509	0.588397151186976	-6.26593745774048
125	DDX21	7.65357803615061	7.10040574415218	16.892284696591	2.23291669603739e-23	1.55768880473567e-21	42.8032239705589	-0.0118044017802221	7.10040574415218	-0.0274262408715787	0.978219460940902	0.982657580597996	-7.06874816190178	-3.21722436951394	7.10040574415218	-6.39193539806283	3.77975447132327e-08	3.06259342008174e-07	8.41624904284877	-0.65953625749954	7.10040574415218	-1.19708497245388	0.236429261921899	0.32077155090909	-6.12645131341906	-3.50709301572688	7.10040574415218	-6.6482074843421	1.44553702901948e-08	9.23059225113696e-08	9.3898460214511	0.356903950240934	7.10040574415218	0.69992272700147	0.486938025991024	0.542136400821883	-6.67115415470343	-0.614823941870952	7.10040574415218	-0.715482128898144	0.477350435004435	0.602306018399426	-6.15152982385761
126	RIN2	-21.3036189843389	2.78844821237409	-20.769231415654	1.22814725982124e-27	3.90896245039978e-25	42.7665421156587	-4.00322340553516	2.78844821237409	-5.84264594520913	2.92067455847641e-07	1.19370266364696e-06	6.63953333588026	8.16172249571681	2.78844821237409	11.3574138930511	5.10379776659777e-16	1.52440411298529e-14	25.2548970200002	-3.29979390641649	2.78844821237409	-3.47239188915546	0.0010148348848534	0.00316185021774605	-0.818147643212318	3.74964632529298	2.78844821237409	4.75506794707185	1.48157592766254e-05	5.08760985274544e-05	2.9778680023524	2.98291179679891	2.78844821237409	3.42811473593164	0.0011609211659194	0.00226860745872775	-0.965708997239351	13.7123556784818	2.78844821237409	12.6999510453783	5.88175538866261e-18	2.08730587573271e-16	26.7209443237424
127	SMARCA1	-6.36435091647728	6.37517538118768	-16.9899053613806	1.71155116780256e-23	1.23632259887015e-21	42.7287754238049	1.01935478362947	6.37517538118768	3.18061725798017	0.00242011670372306	0.00467366109734914	-2.28720165972144	2.47449386924733	6.37517538118768	6.90885932273525	5.42437288171962e-09	5.14406310989891e-08	10.3485512283061	2.01629003131393	6.37517538118768	5.08666150462148	4.5825727877863e-06	3.05654904018359e-05	3.84748449729567	0.582708041259754	6.37517538118768	1.57218134804396	0.1216682295056	0.169057423944684	-5.61426556394559	0.743258142013302	6.37517538118768	1.91079019770847	0.0612716094154355	0.0855920095866425	-5.01661143549591	-0.471753950986486	6.37517538118768	-0.692039219943321	0.491836301168891	0.615248431270591	-6.0110516753688
128	NSD2	-9.47753782240959	5.63703594238807	-17.1330720189891	1.16104884152457e-23	8.63159302987424e-22	42.71937366013	6.51764329271123	5.63703594238807	14.5298986867922	1.94368102259474e-20	3.66599837317174e-18	36.0854585768008	-1.48271466395758	5.63703594238807	-2.78479521321289	0.00734033029138452	0.0173782575587521	-3.09063641622982	3.49896385380104	5.63703594238807	6.17901681847909	8.37526985706277e-08	9.87293095997503e-07	7.77595270749625	0.0519352510042443	5.63703594238807	0.0958855368452861	0.923961472353916	0.941337160740686	-6.69619213153462	0.578132761370969	5.63703594238807	1.02190579010278	0.311318263517029	0.365212683013239	-6.14988293862565	0.313577327479681	5.63703594238807	0.324803132636282	0.746567493390656	0.826229481710728	-6.09734572705248
129	PIK3R3	-12.8812811648641	4.00959048404482	-17.9114548748328	1.46326713445014e-24	1.3932011082848e-22	42.6726258765155	5.1611669791655	4.00959048404482	8.91943203216265	2.94910792249005e-12	3.77345027519612e-11	17.6498718528006	-0.865365568786193	4.00959048404482	-1.22575564328321	0.225535351509671	0.318154786028531	-5.61431732664414	5.88051371339122	4.00959048404482	8.46732132195803	1.5696892170299e-11	5.70974452694625e-10	15.9246811348739	-2.44457575606954	4.00959048404482	-3.42170125532174	0.00118366923420205	0.00269520928914552	-1.10922540744664	8.8837041258042	4.00959048404482	13.3871329942361	6.54964465255461e-19	1.96415801529701e-17	31.7475280158877	-3.7341623286411	4.00959048404482	-2.36187972970976	0.0217656198738535	0.054953603970054	-3.27263211835561
130	PPDPF	-6.39973008159681	8.8352772271229	-16.768117323547	3.13632430659764e-23	2.07425084822707e-21	42.6208096068851	1.99336104209618	8.8352772271229	6.07067156473452	1.25384739425906e-07	5.50449815108987e-07	6.9089507877558	-0.503397248978709	8.8352772271229	-1.3186163993	0.192784945389453	0.278354787183382	-6.36457281873766	2.78143927043811	8.8352772271229	6.93746425818087	4.87070740653136e-09	8.37975590127059e-08	10.2646597404368	3.65814619398632	8.8352772271229	9.88693469383202	8.76336236149666e-14	1.8403060959143e-12	21.062437360581	2.60173016963097	8.8352772271229	6.65265840500321	1.42156879507699e-08	6.81029077039472e-08	9.18653364930517	-4.13154934557607	8.8352772271229	-6.20727934180865	7.53729053940039e-08	8.57735241830089e-07	7.87184789286433
131	ARL3	-7.05223749575379	7.31136164946377	-16.8422113951374	2.56026768734481e-23	1.75008901983939e-21	42.6019023924757	3.63961546541832	7.31136164946377	10.2769905216148	2.18320757970596e-14	4.97448975375956e-13	22.4952394445492	1.32617411007401	7.31136164946377	3.26473098680137	0.00189174338203275	0.00530928805345923	-2.0935884880748	3.86664565754748	7.31136164946377	8.98488245387126	2.3183066202802e-12	1.05535708330975e-10	17.940932507954	-0.561544880783371	7.31136164946377	-1.34678819432823	0.183595251587678	0.242562931303736	-6.07178252070425	3.70280779557069	7.31136164946377	8.91100797605749	3.04197014146339e-12	2.97051446699949e-11	17.6622849092146	-4.92146065207332	7.31136164946377	-6.31043565680003	5.12727869664592e-08	6.00935943904934e-07	8.29005995909971
132	MEIS2	-39.616691551653	5.20967099375688	-18.4557996657813	3.56999087590751e-25	4.22794849664163e-23	42.5957141015404	0.0447349678483384	5.20967099375688	0.0397895070501259	0.968405632971071	0.97483950353924	-6.80712467357731	14.1242765885515	5.20967099375688	12.1541462092523	3.51121226532728e-17	1.29103598997684e-15	28.7544845015345	2.97249970918663	5.20967099375688	2.108478957661	0.0395783779156705	0.0728233546882128	-4.46378690135454	2.65524474213449	5.20967099375688	2.11220234087627	0.0392440626660902	0.0627966658686769	-4.55332082921773	12.229154121746	5.20967099375688	9.94249363709156	7.18204688384962e-14	9.47527817513063e-13	21.3360497364622	7.59078142218604	5.20967099375688	3.55824452115542	0.000779907505121649	0.0034461422731731	-0.65909306933571
133	PKIG	-7.5623476631087	5.72875667187725	-16.9861229897107	1.72924224254257e-23	1.24030508734479e-21	42.4908163713548	0.694805796313624	5.72875667187725	1.91785549086611	0.0603495623345944	0.086914634103202	-5.130805135224	1.05534375497833	5.72875667187725	2.51821417428698	0.0147478598509	0.0318437465722741	-3.78195739073255	-0.670407282636049	5.72875667187725	-1.37563266584044	0.174535542384805	0.250548907567194	-5.71545280506103	-1.59913305742251	5.72875667187725	-3.62794697496312	0.000628288799152253	0.0015199813347662	-0.824189672377641	1.94067757049776	5.72875667187725	4.44121185435163	4.38501093041485e-05	0.000110767203190167	1.68768848491185	6.14106088137755	5.72875667187725	9.29248035542494	7.51967522285732e-13	1.53175784289604e-11	18.759026971821
134	DDHD2	-10.6512467719437	3.80836919872749	-17.9809241509697	1.22010398474094e-24	1.23037218659272e-22	42.4787013531179	0.782458595495027	3.80836919872749	1.63471271553992	0.107844771594676	0.145947249361118	-5.17949434936439	-1.30583436688645	3.80836919872749	-2.34434283753072	0.022715386529531	0.046308288991848	-3.76245680992718	1.05815719605283	3.80836919872749	1.72129116591634	0.0908427903958969	0.145522777631678	-4.83343307742121	3.14412296718657	3.80836919872749	5.60780768825363	6.93372296703885e-07	3.12063492794038e-06	5.82834068755859	4.45427549623967	3.80836919872749	7.69218495399353	2.84544759129636e-10	1.90413165028603e-09	13.1543979379763	2.51806688385609	3.80836919872749	2.31781571589578	0.0242224229781679	0.0597494255346671	-3.39643964749546
135	MAN1A2	-10.432677441766	5.48212355566477	-17.0926578959588	1.2951743769138e-23	9.55895002091814e-22	42.4785728396918	1.11879298747076	5.48212355566477	2.28954832836892	0.0259257348275353	0.0406549051914468	-4.33225420193694	1.11037877526841	5.48212355566477	1.96896476075913	0.0540252951996737	0.0958452589459462	-4.84696560141881	2.29902351376809	5.48212355566477	3.8302816801301	0.000331568097812891	0.00120307127760039	-0.16394560931214	2.9034085206986	5.48212355566477	5.22390067632786	2.80011013143524e-06	1.11142329262151e-05	4.34994309412451	3.06341016684473	5.48212355566477	5.25123320667594	2.53734084045014e-06	8.07083587132563e-06	4.46737604986551	-0.0623365222846104	5.48212355566477	-0.0568498376825875	0.954871712190661	0.970814948094785	-6.07895825889519
136	POLR3GL	-13.8559201510796	4.94688309038791	-17.3436220151121	6.58792967921158e-24	5.3678451026216e-22	42.4486534974214	0.74266747798267	4.94688309038791	1.22660294713561	0.225219099805052	0.28169673726077	-6.00899378778983	3.47193331504665	4.94688309038791	5.14563348205435	3.71005285776813e-06	2.00460946187631e-05	4.11851162691213	4.38335431548458	4.94688309038791	5.92507661915184	2.15277504202553e-07	2.25344437852312e-06	6.8987017055752	-2.98191875982635	4.94688309038791	-3.9437805198452	0.000230002857705453	0.00061631479189439	0.267551089526613	4.12707886903158	4.94688309038791	5.62770395641126	6.445799360127e-07	2.27636846334582e-06	5.84095817513482	4.11280493336047	4.94688309038791	3.37826668432827	0.00134923019186412	0.00549236990572984	-1.10329196912724
137	THOC2	-5.39730472342645	6.46570491588887	-16.8345800638799	2.61427145891806e-23	1.77509032060537e-21	42.3895377599494	1.16108465131857	6.46570491588887	4.2590398874046	8.12352204643722e-05	0.000207155913978375	0.897303537799394	-0.0698863049719449	6.46570491588887	-0.222116404491025	0.825049453786153	0.874233113484392	-6.85470108625464	1.96943688492709	6.46570491588887	5.77559743365339	3.74106895678772e-07	3.59121463948001e-06	6.25869725610839	-0.36766649969123	6.46570491588887	-1.13708326763258	0.260453963022394	0.328714202401869	-6.19901858983503	1.12008259944775	6.46570491588887	3.39821911976385	0.00127062106433937	0.00246876679517293	-1.56545919581265	1.5842533923962	6.46570491588887	3.02847409107932	0.00374421060417181	0.0129095413011137	-2.19397882827777
138	PALLD	-18.7998086433	5.08921267749908	-17.301747088091	7.37103090279421e-24	5.77491921115069e-22	42.3886228622599	9.32391050984425	5.08921267749908	11.0014983204609	1.73148948884812e-15	5.27041860078297e-14	24.9437714193769	8.87921242013219	5.08921267749908	9.6532711449136	2.03104893067768e-13	3.9781217997985e-12	20.3025324723058	0.422927168959205	5.08921267749908	0.395541931470038	0.693979529484596	0.759549597530951	-6.44172248581001	3.25920207975593	5.08921267749908	3.39645900487683	0.00127737701474601	0.00288663964836656	-1.39034209747794	-0.427220767737013	5.08921267749908	-0.372155196103083	0.711213448260202	0.750410128512396	-6.38343840836277	-2.65822276765456	5.08921267749908	-1.18644368998897	0.240568398284876	0.365699871124099	-5.17115458385726
139	PDCD2L	9.33008046080398	4.22399467332746	17.3073571838568	7.26086510516703e-24	5.77491921115069e-22	42.365844020719	-0.19630914279273	4.22399467332746	-0.383544298306639	0.702801084309	0.750789704603227	-6.46028175980859	-2.56260605857389	4.22399467332746	-4.25621561913668	8.20086366962578e-05	0.000330141488044026	1.3241414355788	-3.63594218656952	4.22399467332746	-5.11939639381907	4.0759514462982e-06	2.75106464417145e-05	4.17135539823	-0.562919890997295	4.22399467332746	-0.892612054720393	0.375970218756779	0.44884629188609	-5.94550357734455	0.130229515071905	4.22399467332746	0.206191035191109	0.837406267170119	0.864044456602944	-6.32336035694581	-2.50253269694245	4.22399467332746	-1.91986118551299	0.0600899752078687	0.124977822644914	-4.0698474623281
140	IER5L	-20.4283172666471	5.20142595480312	-17.3072380817864	7.26318646874055e-24	5.77491921115069e-22	42.3521176302223	3.72350212054341	5.20142595480312	4.44779445895635	4.28757416369337e-05	0.000114857819193101	1.66296123103182	-2.28230301262727	5.20142595480312	-2.27054877144083	0.0271296003051243	0.0537891724951705	-4.18777451667031	5.50194422191813	5.20142595480312	5.48413361819802	1.08989853844822e-06	9.01024075819405e-06	5.30312137447293	2.01351388748455	5.20142595480312	2.08797740679837	0.0414640072784402	0.0658010149783286	-4.58241467457325	7.93449907411631	5.20142595480312	8.15347739071969	5.05354633164587e-11	3.91112229390678e-10	14.9620563579579	3.53716097521202	5.20142595480312	2.03479008701367	0.0467243439309137	0.102407454903455	-4.1889311544901
141	TMEM219	-4.89606823477986	6.83617229284306	-16.7040210347265	3.7400570890587e-23	2.44182573410659e-21	42.1673282829377	0.549049197555759	6.83617229284306	2.19738891799832	0.0322406102681273	0.0495653759367361	-4.73359625850938	-0.573140213684406	6.83617229284306	-1.98473338595189	0.0521925227601042	0.0931127770733336	-5.02625051371882	0.553222956432657	6.83617229284306	1.73937842472508	0.0875860628701793	0.141127044824043	-5.36479894060967	0.0180709584886465	6.83617229284306	0.0617376331499644	0.950996522090362	0.962430403168754	-6.91911477489159	-0.125737289357129	6.83617229284306	-0.410791167127298	0.682828492307313	0.725572059900885	-6.80214129060032	4.47460262534434	6.83617229284306	9.99746425107557	5.900461538607e-14	1.41070893827963e-12	21.367038844992
142	PFDN5	-4.70472674306423	9.64147096781807	-16.5207359714936	6.20314992621711e-23	3.73840721884741e-21	41.9782212691454	1.00431404936338	9.64147096781807	4.05185332943405	0.000161628508384242	0.000391296971213098	-0.188814681664581	0.517494253596599	9.64147096781807	1.81034952211979	0.0757287098584307	0.127973603767731	-5.73336921893261	2.29542954337472	9.64147096781807	7.6124013281566	3.84009526455868e-10	9.22437978054957e-09	12.7002343810805	-0.396580733690605	9.64147096781807	-1.36822238244021	0.176829635754244	0.234494674089356	-6.38989857684687	1.5519770470647	9.64147096781807	5.22976636173018	2.74154865385551e-06	8.661828019164e-06	3.92375212416215	-0.267907416644583	9.64147096781807	-0.617690249428526	0.539339508169533	0.657865016851101	-6.74110524948026
143	IGDCC3	-20.7393818519711	7.01763890807778	-16.7224202529328	3.55557915334826e-23	2.33635959205497e-21	41.9616506790598	1.98147536046689	7.01763890807778	2.2553303591154	0.028129373064335	0.0437601442890258	-4.66193138500735	7.06638506724238	7.01763890807778	7.44934972663811	7.09002225870886e-10	7.73975098659697e-09	12.2472048569991	11.0691659968704	7.01763890807778	11.1686120757982	9.73796172658932e-16	1.1400131055783e-13	25.588535576333	-6.40579873676792	7.01763890807778	-6.04478806537717	1.3805239054533e-07	7.18846420094166e-07	7.14084933345505	9.88634411008078	7.01763890807778	10.0809281066574	4.38082774931881e-14	6.01330601439515e-13	21.833891887858	-2.85818994592136	7.01763890807778	-1.51526325688441	0.135456284021171	0.235591231686412	-5.27231738324459
144	MARCH6	-8.25380702144378	5.90579218532043	-16.7749654794434	3.07796657702948e-23	2.06244010441087e-21	41.9424437878277	2.68435143557434	5.90579218532043	6.55514382023709	2.05010397776898e-08	1.08921799757835e-07	9.03331591359338	-2.1629903177644	5.90579218532043	-4.45089694554708	4.24238526898023e-05	0.000182392123109176	1.72652570697118	3.07398622428561	5.90579218532043	6.11386689052675	1.06765239756486e-07	1.21226752164973e-06	7.52160583408642	-0.918731544187834	5.90579218532043	-1.89258169775807	0.0637032959925286	0.0960358303262144	-4.99588455402796	6.20569425448379	5.90579218532043	13.2718428232516	9.42580425354931e-19	2.76662294877233e-17	32.2360436669922	-0.628503030947709	5.90579218532043	-0.693251690482639	0.491081190391387	0.614605790628689	-5.90686684613916
145	NBDY	-6.78629682229149	7.24697296068183	-16.5929557453144	5.07966286334147e-23	3.13553734928078e-21	41.9382548907813	1.34553531306711	7.24697296068183	3.88224187000486	0.000280623995296725	0.000651208792913453	-0.394528019492977	0.175137479296911	7.24697296068183	0.439927683037818	0.661720702449964	0.741106812673508	-6.90528268786577	2.85656854347688	7.24697296068183	6.73702740419675	1.03530593878977e-08	1.62725169545892e-07	9.68079356942972	-1.3784938877696	7.24697296068183	-3.37547945914464	0.00136057152332836	0.00305598930351228	-1.74768378258048	3.75722760718242	7.24697296068183	9.28116239599894	7.83650999420057e-13	8.60073860893673e-12	18.9993100508723	0.030321767037762	7.24697296068183	0.0442569772322117	0.964860532045915	0.976073154438582	-6.46686612087634
146	SVBP	-7.82311648689813	6.59436488512124	-16.6458109368383	4.39022597987186e-23	2.82816789798084e-21	41.9063067103135	0.966331210699951	6.59436488512124	2.47069514410454	0.0166266527274755	0.0271905038582752	-4.10943620234043	-0.689128046310999	6.59436488512124	-1.52448982535699	0.133140469541687	0.204561122685486	-5.75765544305626	1.9797171233534	6.59436488512124	4.0813939063461	0.000146661400952053	0.000591348522841117	0.475290244853964	-1.55949604571753	6.59436488512124	-3.34570529842099	0.00148749489415244	0.00331150502665412	-1.73951930192002	7.44708997713789	6.59436488512124	16.8893072314002	2.25113719954951e-23	1.49855113577854e-21	42.6533847429733	-0.321397732264568	6.59436488512124	-0.400768253399131	0.690149943603286	0.783107974108675	-6.26284847562798
147	NIPBL	-5.52819342839355	6.49286937343143	-16.6437609578692	4.4151074696019e-23	2.82816789798084e-21	41.8915897156761	1.4392658915182	6.49286937343143	5.07419373778355	4.79140635500794e-06	1.537022794512e-05	3.63699941218997	1.16383356707458	6.49286937343143	3.58079639944542	0.000727391735909	0.00229081163581731	-1.08438872464193	1.81109699397853	6.49286937343143	5.14145859762401	3.76603234150642e-06	2.5691252108669e-05	4.01794421251558	-1.0815911667376	6.49286937343143	-3.19528599264802	0.0023189498889118	0.00494524803571329	-2.12500327920122	2.24590194255316	6.49286937343143	6.64680784869224	1.4531570497665e-08	6.93552228297648e-08	9.39964076460155	-0.0503137999933116	6.49286937343143	-0.0877425749142115	0.930401313840687	0.955641123584853	-6.32200140159351
148	UBE2E3	-9.29817414186204	7.92791607307135	-16.5247849970588	6.13395127068245e-23	3.71870795785124e-21	41.8472445183264	1.00095837556229	7.92791607307135	2.15381261672785	0.0356724258969051	0.0543247095932982	-4.97706175464318	4.9967016796787	7.92791607307135	9.72159694208184	1.58750319998513e-13	3.18909666505889e-12	20.5212957480869	3.02259175249808	7.92791607307135	5.40582228519524	1.44953803251253e-06	1.1435743502045e-05	4.7541433860895	-2.31813955421241	7.92791607307135	-4.21617230406077	9.377420603303e-05	0.000273821757008719	0.703196909065685	4.21216153412414	7.92791607307135	7.78656092640638	1.9964955574964e-10	1.37116030027652e-09	13.478079917434	-1.61609964578876	7.92791607307135	-1.79098454682148	0.0788223867113721	0.154564114103836	-5.03450888723716
149	DCTN3	-12.4577750268208	6.60012973088638	-16.6408635809931	4.45051846096402e-23	2.83303315780741e-21	41.805360477604	2.77257795196654	6.60012973088638	4.63436615006597	2.25602240119138e-05	6.42370370593632e-05	2.11350986479653	3.93267955568472	6.60012973088638	5.90857826310774	2.28844843435129e-07	1.60854708791359e-06	6.6490323007186	3.05330574847863	6.60012973088638	4.15975362437672	0.00011316724749694	0.000472186979007101	0.717603918072039	-3.70188796176575	6.60012973088638	-5.13377086294291	3.87129812755263e-06	1.50320897556704e-05	3.95855895495118	7.98209593919373	6.60012973088638	11.93814303197	7.19668511272581e-17	1.55622585717861e-15	28.1342109717444	-1.58099620673703	6.60012973088638	-1.16777259957252	0.247957168319565	0.373420635714147	-5.58225081392315
150	SEPTIN7	-7.91477281990614	8.60506440721896	-16.4372939630028	7.81973942978739e-23	4.60370208626501e-21	41.6956851326333	0.487080635497348	8.60506440721896	1.19091474204429	0.238822947501282	0.296490945916694	-6.61112522288945	4.64202721795238	8.60506440721896	10.3012791650439	2.0033575790143e-14	4.53426598716904e-13	22.5360203893623	3.59867126616027	8.60506440721896	7.32234280808245	1.14352298228387e-09	2.39153625761011e-08	11.7173268723479	-3.61270956931506	8.60506440721896	-7.38425967877778	9.0578668425332e-10	7.605621797248e-09	11.9503587840743	0.89390637543362	8.60506440721896	1.81069406699671	0.0756746017258347	0.10340029763585	-5.53870527622013	1.90579689417759	8.60506440721896	2.6191826164942	0.0113790368859353	0.0326282349896541	-3.52024870810465
151	BACE1	-14.4562580907604	3.926234225283	-17.5673541206867	3.62673144630397e-24	3.1843327397074e-22	41.5129821578211	-1.99455113363698	3.926234225283	-3.14503317022728	0.00268303942095456	0.00513564301868488	-1.992372008667	8.1263207874648	3.926234225283	12.0443608102647	5.05293878393138e-17	1.75048236443337e-15	27.9345253455542	0.695687656415056	3.926234225283	0.827549709183258	0.411516920293933	0.503724515020907	-5.91943257047437	3.59799738526682	3.926234225283	4.9147959837046	8.44528597609944e-06	3.05126774269503e-05	3.46405044197806	3.41657658943936	3.926234225283	4.51729604304868	3.37934694964629e-05	8.70036619872281e-05	2.1689518743738	0.614226805811342	3.926234225283	0.397957902526979	0.692208221912782	0.784657342085643	-5.61732209740481
152	GOLM1	-10.0646780716489	6.40563036730849	-16.5029863675246	6.51596619870532e-23	3.89362790247505e-21	41.4388177891481	6.21245708712867	6.40563036730849	12.4933442703561	1.15152633410378e-17	7.28465572226522e-16	29.9503857971449	1.43499347472992	6.40563036730849	2.49734251628719	0.0155480534470359	0.0333172573865055	-3.90391492837125	0.361375425127275	6.40563036730849	0.578800205326873	0.565096843863155	0.647632649346938	-6.62600659958	4.0459405117082	6.40563036730849	7.20687999128509	1.76622021932943e-09	1.39882993264932e-08	11.4405525853228	1.27646925682239	6.40563036730849	2.09104912914904	0.0411765985096843	0.0594954824544097	-4.70255805491733	-3.26655768386758	6.40563036730849	-2.75871746850633	0.00787320844362046	0.0237948451033455	-2.7085539504931
153	PCNX4	-9.04968776883483	5.56603659974227	-16.6345408205757	4.52879766390444e-23	2.8649567830352e-21	41.43571186218	2.69388856885738	5.56603659974227	6.05969050638066	1.30611456079824e-07	5.7130335657336e-07	7.24282156441831	0.706844809280009	5.56603659974227	1.4038242336856	0.166016238390605	0.245766771512836	-5.78650404511659	3.35059960635781	5.56603659974227	5.90750105477517	2.29759616124895e-07	2.37815212421957e-06	6.81084336810156	0.0741701054597881	5.56603659974227	0.138881096255069	0.890053522191239	0.914106597107771	-6.68104214351169	3.14071988619757	5.56603659974227	5.88900972608481	2.4604034766326e-07	9.29495897978598e-07	6.71663486716267	-0.916535207317725	5.56603659974227	-0.953575014992899	0.344488621662495	0.478992028891811	-5.69196192254519
154	VASH2	17.9029646418637	4.58832010983295	16.7907959197432	2.94724620112692e-23	1.98792732175349e-21	41.3990398788098	-0.327000293834397	4.58832010983295	-0.309626457262204	0.75802002761505	0.798390277276038	-6.50704495160028	-3.94311592514771	4.58832010983295	-3.24590191437436	0.0019995910220371	0.00555987839460767	-1.66308310800478	-4.55553123571972	4.58832010983295	-3.21591832318516	0.00218337106740496	0.00614299290649712	-1.63906852104818	-12.8406437004517	4.58832010983295	-7.89847611587551	1.31215083808734e-10	1.30382988155313e-09	13.6575114863688	11.9997128027893	4.58832010983295	10.8297136324143	3.13989200492206e-15	5.2511986978869e-14	24.1609400938472	-8.23638628949953	4.58832010983295	-2.90264319172448	0.0053222556941875	0.017292940499632	-2.1757531623779
155	ADD2	11.7717968046284	4.16676598720652	16.9259913425634	2.03679274530535e-23	1.4406065354816e-21	41.3841070485756	4.23808157991321	4.16676598720652	6.34838131284492	4.44892036876088e-08	2.18267119247734e-07	8.42633578304596	-10.5674544444735	4.16676598720652	-12.0343430716972	5.22399368848601e-17	1.80360595651627e-15	27.2711010555684	-1.25671225794393	4.16676598720652	-1.38386290868034	0.172014442559985	0.247522901592744	-5.30326218886829	-12.8659310615391	4.16676598720652	-11.3560369346689	5.12781926835613e-16	1.8991577908439e-14	24.0856376615482	9.10798501937256	4.16676598720652	12.2904481363442	2.23935354166855e-17	5.23115041786563e-16	28.5733270742466	-0.427765639957581	4.16676598720652	-0.274270037681842	0.78490895982642	0.852998053332489	-5.68704949250845
156	ANAPC13	-7.11302799065869	6.01658713176129	-16.5018149231895	6.53716613964883e-23	3.89362790247505e-21	41.2880280256865	2.05928800327416	6.01658713176129	5.66300136991051	5.66237046764597e-07	2.16646293061511e-06	5.78659108594793	1.16164831557548	6.01658713176129	2.83450152863969	0.00641560888651174	0.0154804493032746	-3.0360830152438	2.56390977282187	6.01658713176129	5.77019623763576	3.81633363053235e-07	3.65657178052417e-06	6.28168434285862	-1.04202251326469	6.01658713176129	-2.40558972470973	0.0195511492602912	0.0337677556751002	-3.97849435229011	3.3854097038318	6.01658713176129	7.91093255438312	1.25230308438082e-10	9.01392714799906e-10	14.0727305866321	-1.01520529157992	6.01658713176129	-1.23176359360873	0.223299941280783	0.345797461144104	-5.39747500940645
157	ATRX	-8.29232567219207	7.66558439173557	-16.321232051559	1.08059260385761e-22	6.114353150161e-21	41.2678557986926	2.53247720014617	7.66558439173557	5.98954797776393	1.69495769917716e-07	7.25647085587193e-07	6.7533287205972	0.893870857643576	7.66558439173557	1.81551110994245	0.0749215109890718	0.126777801864711	-5.44187341221123	3.19853460864672	7.66558439173557	6.21010577065193	7.45821877142408e-08	8.92619955193353e-07	7.69607444934202	-2.13888364031593	7.66558439173557	-4.22711229937602	9.04064409562183e-05	0.000264686838027165	0.780605589373477	3.09815660165184	7.66558439173557	6.23611110382138	6.76833479211337e-08	2.84387334396348e-07	7.76488341551827	0.708170044419699	7.66558439173557	0.882418137621762	0.381407388297538	0.51309394397179	-6.19056932494811
158	INTS13	7.94967200989563	4.65995023886826	16.6654105415676	4.15940237945926e-23	2.69831294489125e-21	41.2278531372036	-0.678639497596597	4.65995023886826	-1.51431438970549	0.135696246386094	0.179455577668012	-5.51867941490577	-1.72519964764168	4.65995023886826	-3.32714939469967	0.00157218109803794	0.00451315233470022	-1.50332349468393	1.93680261897983	4.65995023886826	3.39669326883097	0.00127647586467998	0.00386127314575754	-1.24248603981224	-3.83763188070588	4.65995023886826	-6.69359513274927	1.21889968719496e-08	7.94781902309901e-08	9.65948634289629	-2.58269053495356	4.65995023886826	-4.53036696028554	3.23089227927034e-05	8.34981930077859e-05	2.18284889763433	-1.06231306797774	4.65995023886826	-0.992374551062684	0.325379093310022	0.458810198721109	-5.37063426612426
159	MDK	-8.26134724240937	10.2975377617522	-16.2294293220628	1.39714982966807e-22	7.73367989954855e-21	41.1732548198192	0.669742064536798	10.2975377617522	1.53289175083244	0.131059132550989	0.17396549785375	-6.38717779032374	7.54723121797389	10.2975377617522	16.0458558856024	2.34220664566051e-22	2.12994416839753e-20	40.6470919566987	2.36017795722776	10.2975377617522	4.5075587446905	3.49424433658029e-05	0.000171920675603309	1.37052324258514	4.97480664136731	10.2975377617522	10.2589565911854	2.32721194706547e-14	5.49945561040877e-13	22.2645208176769	-4.57769720304215	10.2975377617522	-8.23751905898833	3.69283154046528e-11	2.95455532125993e-10	14.9988302394672	-2.71291343565426	10.2975377617522	-3.46444810337023	0.00103968806761852	0.0044002622584089	-1.51621498877703
160	CEP290	-10.3308834685218	5.42212193503364	-16.5620560942472	5.5326332574306e-23	3.39457046547775e-21	41.1566237226196	4.99763522961191	5.42212193503364	9.95122819760132	6.96105257776761e-14	1.38473282235475e-12	21.3916218594414	2.682872333839	5.42212193503364	4.65978322906469	2.06550602705719e-05	9.5456924623359e-05	2.42651749572297	3.08688502819783	5.42212193503364	5.01485440145471	5.92079546991639e-06	3.77603643463359e-05	3.66946794519731	-1.84989657799755	5.42212193503364	-2.9996807786469	0.00406103186970542	0.0082475791810468	-2.48654212346155	2.23834005990042	5.42212193503364	3.60884907932907	0.000666766951825427	0.00136338514441718	-0.816369069046385	-0.824952605029786	5.42212193503364	-0.714335057384245	0.478053609634282	0.602894503977855	-5.81144364927014
161	DOCK7	-7.06714441626565	5.0653453913472	-16.6211461974362	4.69927778334621e-23	2.95445334712229e-21	41.0860624845155	2.23188484435344	5.0653453913472	6.23182034730186	6.87762446307749e-08	3.21759208690796e-07	7.93401922391771	1.00145840074388	5.0653453913472	2.44352522325201	0.0177954685296623	0.0374941760394312	-3.79249075337967	3.95383710415783	5.0653453913472	8.97246924925024	2.42650668597588e-12	1.09839869318508e-10	17.8542125082727	-1.10230978996656	5.0653453913472	-2.55010034643705	0.0135972200365742	0.0244807647290982	-3.49901173267601	3.27062695230756	5.0653453913472	7.44094135345752	7.31792154566512e-10	4.47645831487083e-09	12.3712912523659	-2.2883530953305	5.0653453913472	-2.71303649106818	0.00889322428085657	0.0263843545879768	-2.67264065623674
162	FNDC10	9.20304228490123	3.83028996936	16.8641158737598	2.41146234284052e-23	1.65950972715072e-21	41.0591688534875	3.54724889662821	3.83028996936	6.91773325934217	5.24620021415842e-09	3.18547561451353e-08	10.4751157171925	-5.47392801244689	3.83028996936	-8.32793919199439	2.63627092918526e-11	3.70350612603474e-10	15.3313149747066	-0.15136929805281	3.83028996936	-0.220775855041656	0.826087944114101	0.865874828733366	-6.20347099203826	-7.39805578366569	3.83028996936	-10.2004541127331	2.8637803662743e-14	6.56927996182517e-13	21.3192069867474	1.80214741163741	3.83028996936	2.93007689927218	0.00493303028422854	0.00856656665726644	-2.40825946981778	-1.52908549900147	3.83028996936	-1.17990788594345	0.24313649317439	0.368339310275347	-5.0270815067868
163	BAZ2B	-10.1962205663106	6.13957746735522	-16.3887445303972	8.9509837960416e-23	5.20947256929621e-21	41.0242114797567	2.08879582681943	6.13957746735522	4.08246373100319	0.000146145321543994	0.000357380576212624	0.386473537237497	-0.683555009069147	6.13957746735522	-1.11409208387021	0.270105038144423	0.365438338669095	-6.16389761480239	3.77772583149357	6.13957746735522	6.03063161322082	1.45510281977322e-07	1.59357228165486e-06	7.19811741439523	-1.82976539712732	6.13957746735522	-2.9698209327696	0.00441586701469979	0.00889197420812916	-2.66122700229666	5.71491443529491	6.13957746735522	9.74184437187377	1.47586281716922e-13	1.83761158837024e-12	20.6547055420719	1.12810487889914	6.13957746735522	1.05946817584637	0.294036815495185	0.424688889886481	-5.69757418505411
164	CDH11	-22.8148952621823	4.34157418302552	-17.165871526208	1.06261312286679e-23	8.07665272865545e-22	41.0083040089585	7.96550591750814	4.34157418302552	8.59757686019524	9.68084152923352e-12	1.09798854092699e-10	16.5624216908446	22.0536714181415	4.34157418302552	23.2185150777626	5.05536965536384e-30	2.70994420736215e-27	55.6742839947709	0.540985579503432	4.34157418302552	0.462875383832986	0.645287642747889	0.718279195780027	-6.34396813677446	-16.2684978623537	4.34157418302552	-9.37159093811401	5.63723817390559e-13	9.88214643738872e-12	18.3350634379182	-6.26403005075901	4.34157418302552	-4.54979877228911	3.02188808697804e-05	7.84550858166487e-05	2.29592215154825	14.7872602601419	4.34157418302552	9.8766830565446	9.09145331824369e-14	2.08550567671874e-12	20.4186027588699
165	GUK1	-6.75420012847428	8.28048526745327	-16.1734136226116	1.63505617424096e-22	8.81113605007626e-21	40.9601160018174	-0.45623614016144	8.28048526745327	-1.28668420102966	0.203616495278693	0.257555142127855	-6.47229641792069	0.813445945915387	8.28048526745327	2.01881749949476	0.0484127768982176	0.0876438202467732	-5.19801595298206	0.460417864565667	8.28048526745327	1.04079863539283	0.302541862449769	0.393536254029489	-6.55059894664326	-0.0484836920077143	8.28048526745327	-0.118734962105627	0.905919766044068	0.927315861020988	-7.15715669265407	1.17283381968309	8.28048526745327	2.75187294834397	0.00801885277293475	0.0133081335330521	-3.54490501339259	4.81222233047932	8.28048526745327	8.14149968489626	5.28478449349273e-11	8.82385738790548e-10	14.9064320932397
166	PTMS	-13.793833303729	9.49010436390137	-16.1524069650996	1.73453306264e-22	9.29714338916689e-21	40.9442331245287	4.52625968898159	9.49010436390137	6.64531950235908	1.46130399030617e-08	8.05956837773447e-08	8.95037761446244	-0.0794231570033155	9.49010436390137	-0.0990303024892199	0.921475788273221	0.94590111908514	-7.31336505311432	3.1347779261446	9.49010436390137	3.79908907308953	0.000366303887976982	0.00130731086509125	-0.799267947236581	1.07795395692664	9.49010436390137	1.34770711275508	0.183301211574569	0.242237295950043	-6.40501734566215	5.89141740365845	9.49010436390137	7.41303058369662	8.1283226939596e-10	4.91901168377769e-09	11.9292400380244	-0.757152514978984	9.49010436390137	-0.601040226690699	0.550292731394873	0.667547816729012	-6.68857582186597
167	SMARCE1	-5.90380220265102	5.6199449285479	-16.3705522717892	9.41647779328991e-23	5.41846476410496e-21	40.8144285402966	2.25057221354838	5.6199449285479	7.3227770085951	1.14165533522901e-09	8.00809889070764e-09	11.8880242600186	1.27313359959467	5.6199449285479	3.59159443274511	0.000703458097658507	0.00222180628406735	-0.916240228184471	2.25513310908483	5.6199449285479	5.81106956041378	3.28204780226609e-07	3.20495271966252e-06	6.47123189382092	-1.35557615304783	5.6199449285479	-3.63372128282156	0.000617078905510419	0.00149606014106727	-0.745066797345077	3.17421927981237	5.6199449285479	8.71475562368821	6.2741453434535e-12	5.80401183679146e-11	16.9875444305185	-1.69367984634141	5.6199449285479	-2.55257637554205	0.0135113723165637	0.0374241320005756	-3.13608305280312
168	SSR2	-6.27477184508158	8.56858656052706	-16.0798655631145	2.12778571307471e-22	1.10007601460233e-20	40.7233874162989	-0.600826273231146	8.56858656052706	-1.80299195582815	0.0768919236684136	0.108213934304656	-5.73786553270707	2.30137513006381	8.56858656052706	6.10428180635595	1.10644045827059e-07	8.15419397068451e-07	7.14303450799257	3.06747684477271	8.56858656052706	7.6762016506584	3.02151797514778e-10	7.57984250662073e-09	13.0213188879304	0.479371318340451	8.56858656052706	1.24766379102898	0.217462552228765	0.281841269274253	-6.42576631836616	0.834300850990743	8.56858656052706	2.07649129080149	0.0425542373022209	0.0613294052530238	-5.06842245576274	0.193073974145015	8.56858656052706	0.323615665099207	0.747461540292369	0.826906154890497	-6.72434524833663
169	PTTG1IP	-7.65113260114236	6.85782694235492	-16.1751948387366	1.62689213621098e-22	8.81113605007626e-21	40.7213854195759	0.608811612460417	6.85782694235492	1.53255302202575	0.131142538479628	0.174053525464557	-5.90145702265553	1.46590533896119	6.85782694235492	3.25726571279418	0.00193382877446719	0.0054067180604694	-2.06646685412233	0.254158308917304	6.85782694235492	0.504336968284628	0.616047639700519	0.693025701163553	-6.7142621061055	0.811572301010906	6.85782694235492	1.77757870820769	0.0810253781997131	0.118774248267714	-5.38250551036848	2.32165738504955	6.85782694235492	4.89535256251733	9.04629767409487e-06	2.60714606142208e-05	3.09619357500568	2.18902765474298	6.85782694235492	2.9220723202367	0.00504377502127093	0.0165020393805475	-2.51971418312867
170	MEX3A	-13.4206393720116	6.64181785041147	-16.217159976685	1.44606357411062e-22	7.91836424855733e-21	40.7210354830967	4.19401410583912	6.64181785041147	6.48015996405495	2.71592776614809e-08	1.39988483290578e-07	8.65092516281187	-1.29148259791423	6.64181785041147	-1.68376483922461	0.0979191423998423	0.158302613546412	-5.5210650547556	5.05176803318709	6.64181785041147	6.61199222429862	1.65614842497702e-08	2.45529428069737e-07	9.2328435996638	1.12814690260761	6.64181785041147	1.49644327041921	0.14027903187289	0.192256278854389	-5.81469544906653	6.2953166354697	6.64181785041147	8.46441586108295	1.586725091972e-11	1.36493201534923e-10	16.0490608801021	-1.95712370717769	6.64181785041147	-1.36392261910511	0.178171311590459	0.291467203428979	-5.39988601881338
171	PNRC1	-7.56271926585676	6.80786373972423	-16.1289807092261	1.8527332481941e-22	9.67696827325996e-21	40.5820694116631	-1.73246448268529	6.80786373972423	-4.40024072535135	5.0417910818052e-05	0.000133447614782188	1.31471792469034	0.657968152270777	6.80786373972423	1.46325786931727	0.149112537632873	0.225132092894209	-5.87924120360249	3.54313952341798	6.80786373972423	7.53003918912192	5.23390098486469e-10	1.21152912570106e-08	12.6334094055182	1.10881779748176	6.80786373972423	2.46691994670937	0.0167848031576212	0.0294290273989279	-4.01974160459045	1.81630842006024	6.80786373972423	3.92326338158879	0.000245813864391773	0.000541439059003074	-0.0799723440739148	2.16894985531129	6.80786373972423	2.97431647441748	0.00436065941909183	0.0146192614165406	-2.39459406078084
172	BDH2	-6.16054729045928	5.88176852826142	-16.2246218385789	1.41611244191983e-22	7.79627309240726e-21	40.5313507858198	1.45481456867609	5.88176852826142	4.49695098298328	3.62375007332782e-05	9.89487788119139e-05	1.77346959911057	1.97436320891454	5.88176852826142	5.42514903173056	1.35115720223393e-06	8.03358791871138e-06	5.02174424044219	4.81414155162245	5.88176852826142	12.5009176505925	1.12340598313285e-17	2.11886850707557e-15	29.7878591135503	-0.560572178908209	5.88176852826142	-1.46168218450936	0.149542577987031	0.203024680991457	-5.66963265191442	1.39052112334732	5.88176852826142	3.45284713547678	0.00107702488923614	0.00211807269682758	-1.2845573223797	-2.91272098319291	5.88176852826142	-3.98942128880421	0.000198270057985786	0.00106395181274248	0.615495539190663
173	SPATS2	-9.007253598923	6.02645048956225	-16.1933304195896	1.54608676287658e-22	8.42079875930372e-21	40.5245355524155	1.37729584410536	6.02645048956225	3.03661611155846	0.0036588989459687	0.00684028740174214	-2.66223720103926	1.13038321007096	6.02645048956225	2.16929634290208	0.0344179772888999	0.0659294900672269	-4.56681849806574	2.67403546081276	6.02645048956225	4.78315702079444	1.34273996847491e-05	7.58502860727506e-05	2.81549369886514	1.18242831249746	6.02645048956225	2.22105760987707	0.0305012107867487	0.0501298744332799	-4.43217930417923	1.09442136420953	6.02645048956225	1.9476653794451	0.0565883224261066	0.0796946991025852	-4.92167164072801	1.54868940722693	6.02645048956225	1.76190223928279	0.083666408744688	0.162220135744269	-4.83801399076428
174	USP47	-8.26890324617433	5.8050146248777	-16.2331516522658	1.38264459712849e-22	7.73367989954855e-21	40.5064817034873	1.57120580616317	5.8050146248777	3.71073836250851	0.000484693970049932	0.00107434343524669	-0.706529133775173	1.25274879264636	5.8050146248777	2.56401746636073	0.0131210472569022	0.0287702618539394	-3.64627480868344	3.26764293749758	5.8050146248777	6.16908660040315	8.69117676743294e-08	1.01629891362003e-06	7.73345991614733	-0.818120847191601	5.8050146248777	-1.64463081065328	0.105774371787075	0.149543583655102	-5.41041907983649	3.40809606656478	5.8050146248777	6.78646008784666	8.59694012565997e-09	4.28374927494358e-08	9.95855041163667	-0.412669509505964	5.8050146248777	-0.460593432794893	0.646913995496024	0.75024372895975	-6.06916943864397
175	ZNF589	10.6204333934247	3.63152997905301	16.7703977999796	3.11676717521752e-23	2.07425084822707e-21	40.4845078806805	2.14960922566879	3.63152997905301	3.55709681724502	0.000782674580558221	0.00165900949073579	-0.78978764185767	-5.08032216094395	3.63152997905301	-6.77231419874723	9.06666500745338e-09	8.26714262317929e-08	9.85560845310024	1.16036514299701	3.63152997905301	1.42597425008317	0.15955097791379	0.233078988819844	-5.17437986602756	-5.91692113855177	3.63152997905301	-7.09403459685043	2.70139158808949e-09	2.05325920333518e-08	10.8554689555156	-0.763297569205591	3.63152997905301	-1.00822492876892	0.317780211643313	0.371979250153677	-5.72276998870453	-2.16986689338917	3.63152997905301	-1.41752969598354	0.161992356404309	0.27031111969284	-4.70930157275932
176	GSTM3	-18.4054371641785	5.0452026384732	-16.614141612846	4.7910074437624e-23	2.97539090333659e-21	40.443465950296	5.53686953454103	5.0452026384732	7.25757572999099	1.45929743657243e-09	1.00357490827078e-08	11.6654516578073	8.78365803569171	5.0452026384732	10.6316525825217	6.26445189169628e-15	1.56380986561095e-13	23.7009408193834	3.54003587337707	5.0452026384732	3.74368591130588	0.000436790942120373	0.00151419868805174	-0.376544201915589	-2.39484750482175	5.0452026384732	-2.54909396513735	0.0136322541011754	0.0245308318057369	-3.5331372322433	1.93969874097635	5.0452026384732	2.02885963592617	0.0473452044007604	0.0675933426999923	-4.61028758259953	1.00002248441407	5.0452026384732	0.585814836654536	0.560406355520311	0.676913986121249	-5.86813615404735
177	ZNF292	-6.772270381015	6.95210193877071	-16.030658573368	2.44498685636827e-22	1.24510955660554e-20	40.3553351450778	3.07931651621697	6.95210193877071	8.61906687844763	8.93994711566684e-12	1.02422228766104e-10	16.561850709542	-0.931802097015055	6.95210193877071	-2.20706399675295	0.0315193065286747	0.0611850016319014	-4.57258457925799	2.41115281838824	6.95210193877071	5.42007581609322	1.37632455008336e-06	1.09258499942315e-05	4.94602279407859	-0.273823052002667	6.95210193877071	-0.65647409552432	0.514268016880697	0.584186900728296	-6.71022613779808	3.87975782660528	6.95210193877071	9.38950010234544	5.28172148580817e-13	5.94412523016091e-12	19.3973340153043	-1.39233163117779	6.95210193877071	-1.89245965117864	0.0637198673964482	0.130976155284122	-4.66427711373976
178	UROS	-6.22140845012641	6.2148245545104	-16.075843330741	2.15206950352382e-22	1.10701150976718e-20	40.3097994641344	2.48255436841686	6.2148245545104	7.63710119835624	3.49967241793315e-10	2.73975123571477e-09	12.9890828707704	0.963861846972829	6.2148245545104	2.53984105352981	0.0139582254433494	0.0303253581467952	-3.77293078141757	1.46232206966171	6.2148245545104	3.61166883342812	0.00066094739644589	0.00218918674237444	-0.902727883727861	0.601827985628464	6.2148245545104	1.57574063857474	0.120844895118729	0.168119827453115	-5.60272767295346	0.347653024994321	6.2148245545104	0.863881224246607	0.391420815121476	0.447131112832238	-6.41040521683317	0.363189154452225	6.2148245545104	0.543425761534783	0.589041838517998	0.701601113940569	-6.14184911282548
179	ETV4	19.1668764872447	4.21863136779824	16.404292930522	8.57167713539596e-23	5.01738687494298e-21	40.2731282877762	4.29967690121978	4.21863136779824	3.73604622178561	0.000447476579921704	0.000997712120512818	-0.341456953731536	-9.89358850965907	4.21863136779824	-6.43109125571889	3.26421512426746e-08	2.68763387555894e-07	8.68029873459871	-9.65516908482159	4.21863136779824	-5.04084261581515	5.39714622864165e-06	3.49681516149588e-05	3.87926325866807	5.83536568992236	4.21863136779824	4.510836317045	3.45515079088316e-05	0.000109628382570545	2.12451072893447	-10.9526338242893	4.21863136779824	-6.26262765280732	6.13023700470976e-08	2.59935320120603e-07	8.01871542605562	1.19947234038309	4.21863136779824	0.439190948468481	0.662251125526546	0.762494654475228	-5.63079184034315
180	FRAT2	13.1109300413962	5.29542835842478	16.1328867157171	1.83247171014572e-22	9.62047647826503e-21	40.2568059176887	-2.10868892713209	5.29542835842478	-2.6580090009106	0.0102823863741551	0.017606944388159	-3.40230477384615	-8.76761388241168	5.29542835842478	-8.56804011481027	1.08009798434539e-11	1.61776440743497e-10	16.3956255213141	-1.21033892612352	5.29542835842478	-1.1299889998644	0.263405439329725	0.351241738619174	-5.82819339103868	-2.23136635391617	5.29542835842478	-2.28478398326164	0.0262230738849949	0.0438198535715625	-4.0532009744182	1.6451484764389	5.29542835842478	1.73139099385617	0.0890121233912141	0.119729064545631	-5.11749196341813	-0.438070428251581	5.29542835842478	-0.255759043489873	0.799095037470583	0.863622979269725	-5.97477138682054
181	CYCS	6.75810990950009	8.49962533936	15.8765737339773	3.78475786828766e-22	1.82634289010121e-20	40.1701621552728	-0.44581262863914	8.49962533936	-1.10207134057193	0.275250175510404	0.336117755587887	-6.66538918108917	-2.18513590563394	8.49962533936	-4.69560318954536	1.82347568663521e-05	8.49981687340027e-05	2.21520054877606	-0.900020361247564	8.49962533936	-1.7403445288595	0.0874148673951118	0.140878123681835	-5.55456963107918	-3.97780571870244	8.49962533936	-8.16327353651943	4.8719959381971e-11	5.34136476109122e-10	14.8743441219497	2.92188717439047	8.49962533936	6.27239651572601	5.9105583205177e-08	2.51773469236607e-07	7.82502573242185	-2.17122246966747	8.49962533936	-2.86618316782251	0.00588370821143125	0.0187677790403839	-2.83755646244338
182	DDAH2	-13.0544157948353	5.66505561733493	-16.146314912171	1.76451487893024e-22	9.31170157611631e-21	40.1626172470751	2.75815405397441	5.66505561733493	4.45485353402869	4.18542894493244e-05	0.000112417177753526	1.60022610571623	-0.489121796703592	5.66505561733493	-0.677871955781415	0.500706755403663	0.594786366198544	-6.56138928275785	1.36742738852332	5.66505561733493	1.72809236862658	0.0896066357483388	0.143904696483259	-5.24066971150868	2.41368097213529	5.66505561733493	3.3749672828965	0.0013626653902978	0.00305901410627795	-1.59327207552372	4.55325870031434	5.66505561733493	6.24243725240406	6.61034497628885e-08	2.78208113981413e-07	7.95392628857394	2.45101647659148	5.66505561733493	1.85913569748581	0.0683834938921016	0.138046243883251	-4.56705844117914
183	FNDC3A	-8.90296630142401	5.33842921948032	-16.1505739037958	1.74349964391839e-22	9.29714338916689e-21	40.0227941336138	3.81107842424285	5.33842921948032	8.40265228331695	1.99626488226923e-11	2.10912425580001e-10	15.8587463256259	1.09433905786977	5.33842921948032	2.05794189485101	0.0443675003073413	0.0816934477159363	-4.6219783736392	2.00487947342162	5.33842921948032	3.51993273808031	0.000877506671660787	0.00278684298436705	-1.02363860236474	-1.19908303582391	5.33842921948032	-2.18080092635249	0.0335111477180528	0.0545051164976633	-4.34157822204983	3.12433414384966	5.33842921948032	5.71029088549795	4.75866527264035e-07	1.71322042424327e-06	6.10985410317414	0.0674182378640076	5.33842921948032	0.0670691847784172	0.946770869592991	0.966024975636608	-6.04573817735305
184	ACTA2	-27.6488299817286	3.58908063394455	-17.479679634265	4.57956600023886e-24	3.88690664270273e-22	40.0080014276146	0.513831042590798	3.58908063394455	0.456426621668089	0.649888164398722	0.703936079379026	-6.34250947625981	32.2996529758644	3.58908063394455	29.2745626258272	3.95954788618376e-35	8.06559904415632e-32	63.3646793498598	1.02613417733086	3.58908063394455	0.703039498192779	0.485008970987654	0.573064544026596	-5.96746443002189	-3.20922738917998	3.58908063394455	-2.31043002633735	0.0246575672283072	0.0414691747391527	-3.75384234099878	-16.5665114363113	3.58908063394455	-6.17897943554665	8.37643743471599e-08	3.45261089731212e-07	6.82501873811422	13.5849506114338	3.58908063394455	7.23015901739276	1.61799308124785e-09	2.26363455116886e-08	11.0644629664722
185	GNAS	-6.82701732692254	10.4391478655211	-15.796376386746	4.7564099651744e-22	2.22220346308721e-20	39.9513985145792	-0.355635240431136	10.4391478655211	-0.947697860080224	0.347446187709945	0.412392427668778	-7.11681881681572	2.66229175665317	10.4391478655211	6.38989952877816	3.80867346608575e-08	3.08357227759009e-07	7.98727220071244	1.40147390738126	10.4391478655211	3.08571942150964	0.00318171576899646	0.00848833854746231	-2.94139039258385	-0.23861156298811	10.4391478655211	-0.554205798884198	0.581693986977041	0.647279936344495	-7.28255465234127	2.89853053327795	10.4391478655211	6.62022445347327	1.60573475555773e-08	7.59610240843267e-08	8.88538663566427	0.45896793302942	10.4391478655211	0.725190473513916	0.471422401235521	0.597622213639089	-6.80041921001782
186	SOX5	-23.7463528783699	3.72267535749456	-17.2508424948798	8.45156082534003e-24	6.5552953088432e-22	39.8755224405175	5.94989662553541	3.72267535749456	6.27520179154883	5.84893438527659e-08	2.78111095770505e-07	8.16357561168933	0.870973858045956	3.72267535749456	0.758820803895524	0.451213170203184	0.547161107098396	-6.05984736964523	15.1527908847481	3.72267535749456	14.2352954949107	4.7383589389109e-20	1.46242987250932e-17	34.1477239342812	-4.09691214605618	3.72267535749456	-3.25604842766665	0.00194077439680912	0.00421797516955992	-1.50846234159818	5.97009319085225	3.72267535749456	5.24184602062646	2.6247247739935e-06	8.32798187636255e-06	4.57230001313802	-0.100489534755633	3.72267535749456	-0.0430846399920144	0.965790758373161	0.976529224067373	-5.67806969416466
187	GOLGB1	-6.09186143513082	7.03200885334789	-15.8449593242561	4.14114836718493e-22	1.98016883191448e-20	39.8698318531642	1.99069977430677	7.03200885334789	6.0363921201368	1.42428438814916e-07	6.18871010806279e-07	7.01472706689941	2.39912913199311	7.03200885334789	6.43446321322886	3.22324021114609e-08	2.65819445753222e-07	8.54630740925847	1.40111332619672	7.03200885334789	3.39634385575001	0.00127782018341354	0.0038625728674007	-1.60198365457628	0.853200376671886	7.03200885334789	2.24673236339859	0.0287085253322048	0.0474746436935389	-4.50826710872298	1.47070349349973	7.03200885334789	3.7623200130486	0.000411744029131874	0.00087257863851605	-0.58284646652773	-2.02298466753741	7.03200885334789	-2.87754501925407	0.00570311896290026	0.0183196209211027	-2.54860455782926
188	KMT2E	-9.39149681889815	6.60426456481039	-15.8842270825803	3.70326174428751e-22	1.79608194597944e-20	39.8548010108501	4.97064081799173	6.60426456481039	10.189842211159	2.97373360437792e-14	6.49945853231527e-13	22.2157461796846	0.590383211175165	6.60426456481039	1.04432852528443	0.300921032489464	0.397545918213687	-6.35674931106651	2.62057940433284	6.60426456481039	4.38441891292806	5.32025867694029e-05	0.000246527910030195	1.43593142346183	-2.38105500017366	6.60426456481039	-4.03150009680739	0.000172788739064554	0.000476795802593466	0.307386305983379	6.10509805443736	6.60426456481039	10.9781022323272	1.87729674794243e-15	3.25174615268599e-14	24.9369764341815	-2.51414966886527	6.60426456481039	-2.2642356987948	0.0275404488940029	0.0663617881633829	-3.841938128038
189	MAP4K4	-9.16016673311283	7.37042077991472	-15.7987201213067	4.72470141174306e-22	2.21756146906005e-20	39.7922400951165	-1.70204952658369	7.37042077991472	-3.52933958358484	0.000852518097525335	0.00179472857033806	-1.47526244416009	-2.02413639038826	7.37042077991472	-3.60316240285837	0.000678652626877387	0.00215867489217557	-1.13621005195043	3.56136319181448	7.37042077991472	6.06580121453528	1.27676761064682e-07	1.41963734873775e-06	7.19824690962702	-3.27325891106217	7.37042077991472	-5.65818295932178	5.7634848769221e-07	2.63469898884433e-06	5.71983885644453	7.48489384113724	7.37042077991472	13.9456216246362	1.15011529837131e-19	3.90464143797058e-18	34.4879182079292	5.11335452819524	7.37042077991472	6.2699726082127	5.96432459843691e-08	6.90302795853181e-07	8.1108893407391
190	ITGAE	-5.81435742748817	6.23481761749644	-15.8750204409879	3.80151882868392e-22	1.82634289010121e-20	39.7668953341942	3.64981950590861	6.23481761749644	11.7634545336925	1.29148957121744e-16	5.84614279237761e-15	27.5703537286556	0.265663127313357	6.23481761749644	0.738166408755386	0.463564676394572	0.559939068913509	-6.56506415704327	2.82364859689081	6.23481761749644	7.35302614550785	1.01878444723797e-09	2.16624626202896e-08	12.0250793943703	-0.141437672639438	6.23481761749644	-0.384999041881527	0.701729225255487	0.754551537080568	-6.73295971062322	2.24615491902779	6.23481761749644	6.01976198912975	1.51506960565075e-07	5.97868420517355e-07	7.13524624517596	-3.02949104901297	6.23481761749644	-4.34905422545097	5.99788327000985e-05	0.000373401229248474	1.68756972330836
191	MAD2L2	8.41430917922268	7.07810336514619	15.7669124492443	5.17394510171748e-22	2.39530140277239e-20	39.7586441269042	1.26887743073199	7.07810336514619	2.50635326476856	0.0151978955900987	0.0251161068611319	-4.07316656904205	-4.73104028017399	7.07810336514619	-7.82860589217719	1.70514043223461e-10	2.04398191419032e-09	13.7233530360948	1.09096622637646	7.07810336514619	1.68988408476375	0.0967352619972579	0.153250683378764	-5.45036415798688	-2.17467961090135	7.07810336514619	-3.57637814204499	0.000737407070340181	0.00175437771815341	-1.11461770099122	1.62924393816521	7.07810336514619	2.74326961542909	0.00820543776738135	0.013595637491586	-3.38167822264934	-5.49767688342101	7.07810336514619	-4.92479146013523	8.15175213212459e-06	6.37677384529101e-05	3.51405165063802
192	TOMM7	7.52769334604892	8.9390707435567	15.6914513796485	6.42116351785308e-22	2.89378541722715e-20	39.6592372841085	-2.20982070996698	8.9390707435567	-4.81582159782214	1.1972695987709e-05	3.58969410170197e-05	2.46285678727794	-1.9721096082492	8.9390707435567	-3.77876843190275	0.000390785111952597	0.00132981836459646	-0.799204585853717	-0.556290632203936	8.9390707435567	-0.966692092313234	0.337947419162185	0.430410712037871	-6.65352347245507	1.33281860809045	8.9390707435567	2.56422849774225	0.0131139449086077	0.0237133703034631	-4.07142709599025	-1.07344516465264	8.9390707435567	-1.97634057649457	0.05316125030623	0.0752114646991184	-5.27208344875205	-3.04884583906662	8.9390707435567	-3.621789487568	0.000640456894215617	0.00291989859784515	-0.8504516155982
193	BORCS7	-9.25877687067221	5.57801412608291	-15.938427293911	3.17482003728879e-22	1.57734351608714e-20	39.6017623035685	3.07953115877499	5.57801412608291	6.5253381095216	2.2926678288697e-08	1.20055639264976e-07	8.94400889043043	0.537991672806984	5.57801412608291	0.982313940965636	0.330264797933119	0.427034018909334	-6.25206601770334	2.62238917751016	5.57801412608291	4.45271030868974	4.21618820278859e-05	0.000203034878701663	1.79411977018889	-1.03137446561751	5.57801412608291	-1.82474746548469	0.0734950962687844	0.108816333114925	-5.0708567277125	2.82494084029823	5.57801412608291	4.91647229444066	8.39534424444476e-06	2.42916423663835e-05	3.32114409228999	1.22529848689936	5.57801412608291	1.2222980376055	0.226829262186444	0.350463597598442	-5.42768797596224
194	CMTM3	-11.1138582761526	5.56381499965502	-15.8887331264085	3.65611432587153e-22	1.78169973248811e-20	39.4553605139351	-1.43775099858754	5.56381499965502	-2.56040613483146	0.0132431309552557	0.022144358689752	-3.75233563707503	2.32519186571647	5.56381499965502	3.65469803091747	0.00057794326779906	0.00187284511057379	-0.765955274036286	4.03321874189348	5.56381499965502	5.86787744891658	2.66051289567935e-07	2.69089611146914e-06	6.64964847939055	1.64288811587266	5.56381499965502	2.54688350725498	0.0137094921359082	0.0246580961552373	-3.66261197511297	-6.74671790397213	5.56381499965502	-7.89935691271704	1.30782628924496e-10	9.37382882192814e-10	13.9997629325727	11.2970284552297	5.56381499965502	12.3845229920098	1.64402706434172e-17	5.47203125827465e-16	28.8176405707068
195	MARCKSL1	-7.17391393327293	10.1292604364555	-15.6155625419265	7.98418560547602e-22	3.53560566920753e-20	39.4415255302049	3.69084731068012	10.1292604364555	9.35966781453924	5.8871998445831e-13	8.97621712830521e-12	18.9755538674217	-3.84181079688776	10.1292604364555	-8.14261053597757	5.26289902806375e-11	6.98860842253315e-10	14.6131589563917	4.92745409582209	10.1292604364555	10.5629310043303	7.96969804327268e-15	7.1833074841356e-13	23.3784802716865	-1.6423792834599	10.1292604364555	-3.53512220620109	0.000837495027203647	0.00197177227278528	-1.67526020894761	5.91983815904211	10.1292604364555	13.236551585024	1.05405144238662e-18	3.0585509802586e-17	32.2738038358253	-1.88003555192373	10.1292604364555	-2.70153589357124	0.00916846606261513	0.0270747540874848	-3.5334642596466
196	PSMG4	6.81982307696845	4.94797351322503	15.9116797780245	3.42529694323126e-22	1.69269238126278e-20	39.431454339318	1.34502226521676	4.94797351322503	3.36729417058184	0.00139440225617774	0.00281116131812555	-1.53310073573122	-2.64076752546408	4.94797351322503	-5.61800054147794	6.67936037256176e-07	4.25183033715884e-06	5.81930480965559	-0.408812077163772	4.94797351322503	-0.771318683456495	0.443833179327092	0.534963423839814	-6.13614414519356	-2.37078653069257	4.94797351322503	-4.69261721148931	1.84254291962384e-05	6.21194956516678e-05	2.69175280169993	-1.14462422380338	4.94797351322503	-2.24236411091165	0.0290067885930053	0.043160575868482	-4.07950335809023	-1.59985498506142	4.94797351322503	-1.72501581845773	0.090164080639035	0.171713006976173	-4.53412616386726
197	CCNI	-7.31380293237133	9.43914169160972	-15.5974643730986	8.4108262520597e-22	3.69242523177707e-20	39.3913764048344	1.32801509306771	9.43914169160972	3.31637962322105	0.00162340350398638	0.00323758854280425	-2.35542601065438	-0.160954243263696	9.43914169160972	-0.346869396559387	0.730018712929618	0.797858202724343	-7.24774238793656	2.37414150055165	9.43914169160972	4.87365193553374	9.76670861190495e-06	5.77665082533402e-05	2.72836310284872	-1.41753005814468	9.43914169160972	-3.0030360066785	0.00402286639728951	0.00817822240646581	-3.05221498628163	5.32635235471394	9.43914169160972	11.523820206902	2.89875719807283e-16	5.77765989478899e-15	26.7202608245245	-0.136221714553571	9.43914169160972	-0.19171883575	0.848671482242863	0.899637702606532	-6.86701272547529
198	LIX1	-26.5942546205134	4.12083952958055	-16.8651607485639	2.4045875333148e-23	1.65950972715072e-21	39.3874873914104	22.4574505561405	4.12083952958055	19.952965250734	8.58112878518812e-27	1.45664661128568e-23	48.3558071765904	27.2044769734219	4.12083952958055	24.0461879720316	8.78518113279374e-31	5.59231686484401e-28	56.1416441442615	2.40036655068012	4.12083952958055	1.85760271818395	0.0686047956322419	0.115278546830418	-4.74021700980982	-4.84225409238658	4.12083952958055	-3.40235442659525	0.00125488136945239	0.00284084613200102	-1.14395564728669	-17.0190417105592	4.12083952958055	-7.60330264667927	3.97369602572576e-10	2.58112844528169e-09	12.0292881545552	-3.60674365678343	4.12083952958055	-1.20199854472143	0.234535590152836	0.359101771753854	-4.98197137580654
199	MBNL2	-26.16399940681	2.76569853421188	-19.0817667481885	7.31508133530095e-26	1.09564857941235e-23	39.3856601722169	-0.509648623421616	2.76569853421188	-0.581482939472834	0.563300685407669	0.623475057691492	-6.12333714774998	9.29798970118171	2.76569853421188	9.87839350901597	9.03586365328246e-14	1.89490743347000e-12	20.4852835319935	3.83445242531482	2.76569853421188	3.37569697593305	0.00135968319893998	0.00408145398797633	-1.0954261461383	-1.37253772548631	2.76569853421188	-1.29869465266517	0.19949024858099	0.260956612098302	-5.31042931326959	-0.0676747403422926	2.76569853421188	-0.0579867167316528	0.95397025924635	0.962475194692825	-6.02931371205675	14.9814183695637	2.76569853421188	10.0382934770651	5.10008771252051e-14	1.22510361679296e-12	19.0576710702127
200	TLCD1	14.7746739943048	3.43307583305819	16.462746229557	7.28578202120594e-23	4.31428429569666e-21	39.3851509840736	0.0138076497670667	3.43307583305819	0.0156622512052114	0.987560759033162	0.989825536487143	-6.3296132154894	2.53165984713887	3.43307583305819	2.58219514858606	0.0125219259771092	0.0276650360253487	-3.16477854865325	-9.97964740950458	3.43307583305819	-7.57772376147922	4.37476724107509e-10	1.03380520534454e-08	12.1915770211122	7.79068549560183	3.43307583305819	8.13712816282509	5.37180116362982e-11	5.8204037076138e-10	14.6515722282073	-13.1265004775262	3.43307583305819	-8.40687403293001	1.96516315366302e-11	1.6665434404711e-10	14.2745354462213	-2.00467909978178	3.43307583305819	-0.911611153682817	0.365968574834042	0.499181724211158	-5.15316566938187
201	PHPT1	-4.57620973364867	8.74048576841314	-15.5735887956224	9.009267492418e-22	3.92134142778963e-20	39.3122301542141	3.2623802263291	8.74048576841314	12.8694141874126	3.4038816447107e-18	2.60665673318635e-16	31.1300964065757	1.49034522337547	8.74048576841314	5.0744139945899	4.78763709482694e-06	2.53441184047882e-05	3.44785063428269	1.61641731819534	8.74048576841314	5.15064848581748	3.64389081601885e-06	2.51103030860297e-05	3.77235500650607	1.20529058501141	8.74048576841314	4.07767738668928	0.000148467969177398	0.00041785100013855	0.134017260784597	-1.45255368784913	8.74048576841314	-4.55816930736448	2.93597845352284e-05	7.63804356299621e-05	1.75482603107859	-1.54566993141349	8.74048576841314	-3.27310817285425	0.00184554656539908	0.00713896383159501	-1.84979301245885
202	DACH1	-20.0862724916998	3.80942640499747	-16.6176731779797	4.74453436026306e-23	2.96460628584536e-21	39.2858577917447	17.2535067995981	3.80942640499747	19.7115477860187	1.54283704883944e-26	1.96422441780371e-23	48.1149427247706	-9.70102199973797	3.80942640499747	-7.33881958937211	1.07474943151981e-09	1.13315972671111e-08	11.7816861775163	-6.79194186120843	3.80942640499747	-5.47289640441724	1.13548935522949e-06	9.32657990565516e-06	5.36134655380324	-1.61256519988893	3.80942640499747	-1.38931803543181	0.17035891119461	0.227495150192356	-5.35854395739692	15.9445516909994	3.80942640499747	16.950175077349	1.90692960814021e-23	1.28623033502703e-21	41.5440766672112	4.99374306193755	3.80942640499747	2.53444725523555	0.0141514898403148	0.0387108388953582	-3.00083502782024
203	BTG2	-15.743075063633	5.48449650609042	-15.9101485016952	3.4402289928463e-22	1.69269238126278e-20	39.2728589219108	-0.954330112637527	5.48449650609042	-1.27187276690611	0.208792527227106	0.2634479546343	-6.04539821388656	-8.40209092209726	5.48449650609042	-8.7577474773754	5.35259236682962e-12	8.2977402216377e-11	17.1247559716616	0.959190757662342	5.48449650609042	1.01929228257833	0.312545784831884	0.403713229995274	-6.12343283879892	10.3310260187917	5.48449650609042	13.0310305087983	2.02737563687552e-18	1.50721320157498e-16	31.5150893211907	9.80612590004885	5.48449650609042	11.8382616199124	1.00491829668088e-16	2.14123281416208e-15	27.7182014620887	4.00315342186486	5.48449650609042	2.694346679109	0.0093444699228665	0.0275067705677443	-2.87535892791101
204	COL2A1	-25.2149810153718	5.34947494582077	-16.1486743276525	1.7528412117518e-22	9.29827486546463e-21	39.1889788261425	13.2778194584672	5.34947494582077	11.6706936852048	1.76454064736995e-16	7.60695826190769e-15	27.1366192994858	4.79088632273175	5.34947494582077	3.83365215105181	0.000328010171511125	0.00113516262210017	-0.139824316763797	15.9606320217111	5.34947494582077	13.3714900434155	6.88059705351619e-19	1.79689438436057e-16	32.4018053718413	10.6055126558231	5.34947494582077	8.84839003723543	3.83106851419817e-12	5.36718470661738e-11	17.46261259208	-1.47511912669723	5.34947494582077	-0.974003852078994	0.334337018316313	0.388990465107568	-5.98887855083108	-17.944750316664	5.34947494582077	-4.51129527295496	3.44971071982265e-05	0.000230849564266713	1.78020416757197
205	LAMTOR2	-6.43351441131701	7.00661105892651	-15.5578338501691	9.42764852064322e-22	4.08598298650005e-20	39.0920519015819	0.704735789496598	7.00661105892651	2.02287076719318	0.0479794016567424	0.0707909902758107	-5.11392164799553	0.540831498359377	7.00661105892651	1.35104969781528	0.182234658576851	0.265303029960724	-6.08124715453337	1.14291222305017	7.00661105892651	2.58420088746573	0.0124573661968782	0.0271804358858622	-3.71341527227455	1.2841987583058	7.00661105892651	3.20281540504863	0.00226857979932237	0.00484594908894681	-2.23323480295081	0.830595634462258	7.00661105892651	1.95105968003167	0.0561730370621184	0.079175530373329	-5.07126836578853	1.93024050764279	7.00661105892651	3.01574648213638	0.00388129912822465	0.0132966806663195	-2.33842685054701
206	POLR3G	22.8640109963294	4.11968075732545	15.9722652406539	2.88435940431045e-22	1.4404322780677e-20	39.0874442553476	1.79252045294649	4.11968075732545	1.25637904643772	0.21431117519598	0.269842912519602	-5.71342822877804	-7.2530619749445	4.11968075732545	-4.05294048911242	0.000161052416219444	0.000602615304627127	0.746696728726638	0.776177812118059	4.11968075732545	0.417798986167107	0.677727584208166	0.745809244727944	-6.1594730510559	-10.0373051924735	4.11968075732545	-4.59599048477227	2.5766268121733e-05	8.39774210623522e-05	2.46930791744812	-3.45147353223419	4.11968075732545	-1.9370125401172	0.0579087648569915	0.0813630528443177	-4.50418112858567	-4.69086856174173	4.11968075732545	-1.28362030159871	0.204679262837969	0.324763715844325	-4.90167337909755
207	TUBA1A	-16.3581786664118	9.70091460367473	-15.4825397358438	1.17163942323892e-21	5.00048857057917e-20	39.0590599715518	8.60992300532067	9.70091460367473	10.4276148593673	1.28243266089342e-14	3.16260935864394e-13	22.8379213796387	-4.45991561385133	9.70091460367473	-4.46836206618639	3.99652947328483e-05	0.000173063999512781	1.30496239030905	5.78859541925786	9.70091460367473	5.90627331669255	2.30806644064181e-07	2.38656413177024e-06	6.33345201880847	-9.93044440315919	9.70091460367473	-9.33454649625252	6.45101924142348e-13	1.12313899100681e-11	19.0810505254347	20.1951067102938	9.70091460367473	23.6690340487262	1.93797315024215e-30	5.19427803558325e-28	59.0781928213367	-3.84508645145002	9.70091460367473	-2.3869543953642	0.0204692947090294	0.0522505680730488	-4.11601299867038
208	RGS12	-9.61273634154897	4.31582040256283	-16.0447481215612	2.34954815736959e-22	1.20251999913615e-20	39.0116056673789	0.516424833748144	4.31582040256283	1.07608517530425	0.286606637438594	0.348173735962796	-6.07059842461971	-0.146427984268665	4.31582040256283	-0.248883692703	0.804381713114647	0.858136351531652	-6.42970236494669	3.60459520097683	4.31582040256283	5.84373557173487	2.90893523538097e-07	2.90181247525516e-06	6.64504425573961	0.0618867769482163	4.31582040256283	0.106801840848712	0.915336444673116	0.934794113004681	-6.45952920259005	2.50962827893909	4.31582040256283	4.19508077704473	0.00010061378196283	0.000236717803024122	1.10436573733256	3.06662923520537	4.31582040256283	3.09791169709233	0.00307261134103949	0.0109793009739948	-1.77525965071603
209	MAL2	19.8221588994755	3.83728198313164	16.2706795034929	1.24466933681299e-22	7.00384375438692e-21	38.9900701527759	1.2993740491389	3.83728198313164	1.0664285633797	0.290908519302215	0.352768575912973	-5.76736897430472	-7.07709865037179	3.83728198313164	-4.62619990918533	2.32080241535064e-05	0.000106187657683496	2.566326524687	-15.6107301462827	3.83728198313164	-7.33397279207424	1.09453849372203e-09	2.2938013494977e-08	10.9492906430434	17.7848657436997	3.83728198313164	14.4348514259279	2.58804544393888e-20	3.13800510077589e-18	34.2506278577897	-7.45486503554155	3.83728198313164	-4.37473448529692	5.49803271582603e-05	0.000136114397692485	1.77814357268591	-8.76370486011813	3.83728198313164	-2.49404536295841	0.0156779928074137	0.0421431398109022	-3.03176767350963
210	CIR1	-4.58991170435974	6.0603197666674	-15.6081664630018	8.15582121560975e-22	3.59597571779157e-20	38.9790054860578	-0.663506828353015	6.0603197666674	-2.6109089493143	0.0116260984758978	0.0196795434563767	-3.67824543980175	2.87005605996912	6.0603197666674	10.1690094970668	3.20213739246584e-14	7.08994985701403e-13	22.1473865487577	1.14382823441884	6.0603197666674	3.59635759028335	0.000693141284935836	0.00227631133389644	-0.892585789019781	-0.155707065340134	6.0603197666674	-0.521657128454101	0.604012368290149	0.667592617583849	-6.62616436247005	1.99028442542431	6.0603197666674	6.60810822022347	1.68047875953075e-08	7.92025736502579e-08	9.2952748082573	-0.595043121759385	6.0603197666674	-1.11451240650043	0.269926365369999	0.398030987591347	-5.60512218801355
211	ATP5PD	5.78191676578509	8.18887445674277	15.4540540569965	1.27227359004036e-21	5.37680768239049e-20	38.9650452365513	0.692361797994764	8.18887445674277	1.97678749675132	0.0531092788172814	0.0774732175242066	-5.34160543271456	-1.44163277803394	8.18887445674277	-3.56077603446044	0.000773837056493348	0.00241838920539575	-1.35996489643763	0.122106301278144	8.18887445674277	0.273713112579335	0.785334721675233	0.834494954643949	-6.98938985415179	-2.08050150634238	8.18887445674277	-4.99130138900519	6.438321610016e-06	2.38799364887156e-05	3.28126750917589	0.698969813390342	8.18887445674277	1.68373222361957	0.0979254842148438	0.130392346284244	-5.70307623414299	-3.77322039407203	8.18887445674277	-5.40078550758984	1.47631847321948e-06	1.34613282450675e-05	5.04348639420442
212	BTBD6	-9.69498597787319	4.31727249984194	-16.0009179168297	2.65956217859625e-22	1.34097231628727e-20	38.8683304979799	0.285198923557541	4.31727249984194	0.591980241027953	0.556299788327174	0.616664491087535	-6.46961640909435	2.65719348467169	4.31727249984194	4.79097748456075	1.30640962847694e-05	6.32103661094423e-05	2.99136616841657	-1.65290759821539	4.31727249984194	-2.47601561045249	0.0164060502941694	0.0343323653680122	-3.47611490907842	1.94607232911204	4.31727249984194	3.46283747923568	0.00104479717713304	0.002411343586925	-1.11364850758382	2.3057611926744	4.31727249984194	3.84456732521036	0.000316738080893834	0.000683180295193499	0.0311079984804232	4.15366764607289	4.31727249984194	4.04130594061334	0.000167322015369146	0.000911810982629618	0.777219990216238
213	TDGF1	22.2138291405609	6.27101141782542	15.5026400414533	1.10552142430132e-21	4.77107445191056e-20	38.8536907918294	-1.01127332824325	6.27101141782542	-0.697439712833837	0.488477874712241	0.551996799505622	-6.61590400075937	-6.51188970898948	6.27101141782542	-3.84366992581267	0.000317650589785997	0.00110343494439644	-0.169411767330254	-3.98785913673471	6.27101141782542	-1.97091480111555	0.0537956931977066	0.0939648662697036	-4.67475787148494	-4.13814348436897	6.27101141782542	-2.28081499704536	0.0264730832282186	0.0442013692917059	-4.15811010417086	1.00010100791703	6.27101141782542	0.60735543079054	0.54612505032785	0.599125768805381	-6.56547017448758	-7.56476449014148	6.27101141782542	-2.04099169108382	0.0460826386933756	0.101196997648131	-4.05786165226366
214	C12orf57	-7.84585575475289	8.02460718351324	-15.3958559871516	1.50600013760852e-21	6.1354445606171e-20	38.7559879882452	3.97764163282044	8.02460718351324	9.45117624835	4.22135478120064e-13	6.70453811850367e-12	19.4856866551296	-0.148979972652526	8.02460718351324	-0.302024616329958	0.7637772471206	0.825149365809215	-7.08718840430283	3.81046986163733	8.02460718351324	7.4639572282089	6.7108706725872e-10	1.525674504471e-08	12.2799119765078	-3.12314908369172	8.02460718351324	-6.0558920227699	1.32469364920948e-07	6.92963781057962e-07	7.08482558551947	3.01973723052453	8.02460718351324	5.9986117118754	1.63887497072628e-07	6.42847926057373e-07	6.85002203057514	0.310136086114852	8.02460718351324	0.396116496762464	0.693558121640575	0.785748380383291	-6.59749470624009
215	ZSCAN2	11.0532619028134	3.78506195025393	15.9721737369972	2.88510736107816e-22	1.4404322780677e-20	38.699814234181	-5.73839757237151	3.78506195025393	-8.51568691640339	1.31163445524735e-11	1.43954708261791e-10	16.1571301011767	1.54669250075678	3.78506195025393	2.11205010373432	0.0392576832795228	0.0736352678088286	-4.2443243324656	-3.88900787949706	3.78506195025393	-3.88611686732949	0.000277142755859105	0.00102922712946236	0.322971789391787	-2.79418480161645	3.78506195025393	-3.33481968755572	0.00153663641358582	0.00341195593467878	-1.28462319668179	1.3475980929165	3.78506195025393	1.67458032702419	0.0997183550402988	0.132535868547959	-4.92777218669825	-1.52596224300171	3.78506195025393	-0.931824569667594	0.355516804043784	0.489273410670251	-5.23107258709257
216	TSC22D1	-11.6585065761237	7.63295546597293	-15.3965121920878	1.50313565268859e-21	6.1354445606171e-20	38.6877517657857	2.27786212009801	7.63295546597293	3.71793907157149	0.000473813168577147	0.00105251627523626	-0.960990033160996	5.12856087637618	7.63295546597293	7.47904552970363	6.34054372728195e-10	6.95888339034124e-09	12.3329581529713	0.656708127062915	7.63295546597293	0.856727824778679	0.395328464903403	0.487932672690397	-6.62130043601144	-3.13692983915418	7.63295546597293	-4.23276043793972	8.87139536040595e-05	0.000260765257563448	0.804997981946189	0.0780076514198154	7.63295546597293	0.103698959127367	0.917787051661774	0.933366063022982	-7.00465445304944	6.65429764032092	7.63295546597293	6.31098445367484	5.11676947809598e-08	6.00395128276585e-07	8.24881138490256
217	GREB1L	-34.6887031278167	3.44424838246788	-17.705862191696	2.51299583784943e-24	2.28525559004432e-22	38.6791290668463	3.3403420170209	3.44424838246788	2.84887371599912	0.00616903206009767	0.0110521708939481	-2.70761074879419	5.47568550234085	3.44424838246788	4.00457289300648	0.000188702705920188	0.00069517713571893	0.578893009362977	7.87764088431425	3.44424838246788	5.70847014094531	4.7906554510167e-07	4.43974756766198e-06	6.17625594308357	5.80299416678585	3.44424838246788	4.30629967720817	6.92970850688106e-05	0.000208136482284234	1.50817099951146	7.83068707387108	3.44424838246788	5.47357739328533	1.13267363824668e-06	3.82375903398822e-06	5.36726108632908	4.3613534834838	3.44424838246788	1.62234509963038	0.110472566055606	0.201233046727367	-4.53451359535294
218	ZNF90	9.41513419192573	4.78136082718671	15.6546350417684	7.13639542782149e-22	3.17398198394593e-20	38.6342605707875	-0.186286612643091	4.78136082718671	-0.324628615452513	0.746698865823665	0.789063100947511	-6.57860500623726	1.23196598310193	4.78136082718671	1.8928787405097	0.0636629790083305	0.110160965205546	-4.79516162363016	-0.595473829217627	4.78136082718671	-0.771334971154195	0.443823607886067	0.534963423839814	-6.06291432463408	0.992940746575509	4.78136082718671	1.46688555784642	0.148126146016709	0.201262646368754	-5.42607867917573	-7.37790421052932	4.78136082718671	-9.49334877142805	3.62242563566482e-13	4.19254603400525e-12	19.4397127412062	-3.48037626921313	4.78136082718671	-2.46112045066897	0.0170303996186635	0.0450531480821007	-3.14430263125098
219	ZNF704	-13.8058837317905	3.74479334657924	-16.3400622143657	1.02524257273782e-22	5.83357296275682e-21	38.618051862647	4.06367428619027	3.74479334657924	6.42192751060823	3.37820938572069e-08	1.70500805716379e-07	8.68854709187363	1.56603776810304	3.74479334657924	2.11331044855093	0.0391450447599527	0.0734781203243859	-4.26289055482786	7.08908564057907	3.74479334657924	9.22591039449176	9.58734577014713e-13	5.03335652932725e-11	18.5282176524744	-2.68227945046099	3.74479334657924	-3.3250973609519	0.00158182141769034	0.00350007628485252	-1.35372964993335	2.4682063349671	3.74479334657924	3.10989729922267	0.00296878082901772	0.00538121244768562	-1.94066559055409	1.30115915241197	3.74479334657924	0.923446173437047	0.359825335185885	0.493180061750537	-5.38794440501054
220	SCAF11	-5.55906023539519	7.03989225538876	-15.3829151235692	1.56363505835926e-21	6.29471267564784e-20	38.5993447809305	1.31609465733748	7.03989225538876	4.24242122850557	8.58900710871339e-05	0.000218306481211647	0.772671098830478	0.766869183393832	7.03989225538876	2.15825344629509	0.0353086063172996	0.0673568374867385	-4.7137057074067	2.12034382811008	7.03989225538876	5.57504813082792	7.81791421825477e-07	6.71944779012024e-06	5.47654065107707	-0.480304572818084	7.03989225538876	-1.31457826513873	0.194130177521522	0.254500689671348	-6.07331426542131	0.00649496578991471	7.03989225538876	0.0169900393081136	0.986506305175304	0.988641810312946	-6.89663797481152	1.82956217358197	7.03989225538876	3.12645633120619	0.00283073310081986	0.0102674560654738	-2.01357929366455
221	CUEDC2	-9.96268391096796	6.73978407401719	-15.4164105532096	1.41884938694284e-21	5.89835959429095e-20	38.5919423026302	2.82489217547647	6.73978407401719	5.42860330112353	1.33428181900312e-06	4.78509166427704e-06	4.82857641760202	-1.48756421864578	6.73978407401719	-2.42631297872507	0.018573684010146	0.038868091129169	-4.10556816357114	8.81290992771295	6.73978407401719	14.551562799994	1.8211700416253e-20	5.79644277311052e-18	36.2030777088477	-4.40631888197871	6.73978407401719	-6.81957351446029	7.59019152882084e-09	5.19879628251784e-08	10.02613528811	5.34045400794423	6.73978407401719	8.75870692816815	5.3336589300253e-12	4.98836696072614e-11	17.1265137913214	-1.12168909954121	6.73978407401719	-1.05549186952691	0.295834305409168	0.426418398045906	-5.8376996419769
222	NDN	-10.0380600156754	6.60271982233073	-15.3979045044323	1.49707617602934e-21	6.1354445606171e-20	38.4924516740995	4.42277455121789	6.60271982233073	8.34193437755603	2.50239054151616e-11	2.57442905710526e-10	15.5661141325192	2.54445183863931	6.60271982233073	4.24683534449629	8.46290326946219e-05	0.000339113431212229	0.926834762136528	1.99627075108601	6.60271982233073	3.05233082968839	0.0034993522638733	0.00918579969266742	-2.50797294063394	-2.19781895752271	6.60271982233073	-3.46434328423301	0.00104001984375867	0.00240086176534044	-1.39790709577133	5.70874767750739	6.60271982233073	9.3704906495492	5.65985027827994e-13	6.33467858069024e-12	19.3359218146437	-2.43636584525247	6.60271982233073	-2.0063460030195	0.049767479035225	0.107732576827581	-4.33155748719773
223	TFG	-4.9230765235681	6.98126338684546	-15.329202467224	1.82779073623684e-21	7.24359869594249e-20	38.4482518471473	1.73354668555388	6.98126338684546	6.27709081053034	5.8077985781606e-08	2.76284112650937e-07	7.889622839553	0.975080356401326	6.98126338684546	3.07739423242784	0.00325828784564676	0.00852006719073484	-2.5605147250445	1.04323057557756	6.98126338684546	2.98277437897151	0.00425853036348352	0.0108813677250576	-2.71685165516189	2.24281583373458	6.98126338684546	7.15756250983537	2.12665183904714e-09	1.65343121990039e-08	11.2195440593306	0.218975176243862	6.98126338684546	0.646713923537121	0.520518271362684	0.575184831705429	-6.69005265427371	-1.2905721039431	6.98126338684546	-2.27909930455677	0.0265818093644319	0.0645617230313884	-3.94033852399945
224	PCDH7	-21.1292305922813	4.86622303818267	-15.8913793182625	3.62871106488292e-22	1.77684722095349e-20	38.4464357681721	2.27497064368786	4.86622303818267	2.31209132000482	0.0245590863703823	0.0386845491312007	-4.1299515051482	10.0121368948471	4.86622303818267	9.58726785194834	2.57804225216743e-13	4.96601538528104e-12	20.0593322622021	0.91890181359819	4.86622303818267	0.777315239340611	0.440317507071552	0.531985030785736	-6.21958581843478	9.11663248371959	4.86622303818267	8.56492735335165	1.09263699388838e-11	1.39106347284415e-10	16.4338013514352	0.231541154758445	4.86622303818267	0.177396708150698	0.859851245061844	0.884157994038857	-6.4086542859671	-1.42495239832992	4.86622303818267	-0.576942580836436	0.56634222627111	0.682100743245296	-5.66438408445136
225	FGF2	15.5923185946404	4.3470298090863	15.7133973530542	6.029853245266e-22	2.74124839506653e-20	38.4448660258219	3.65614130867968	4.3470298090863	3.76162366115178	0.00041265471969414	0.000925950279815997	-0.257857655341295	-2.34016870980523	4.3470298090863	-2.00980486758574	0.0493885286548107	0.0890935466435082	-4.42681110612736	-2.63146709061679	4.3470298090863	-1.91228636541207	0.0610753596790599	0.104416578245484	-4.46126617749009	-5.08960840154425	4.3470298090863	-4.03125704955273	0.000172926404898157	0.00047704643388075	0.690270943145184	-5.1702985012471	4.3470298090863	-3.96796396727135	0.000212623771686555	0.000473039125082473	0.508491393806903	-4.01691720010675	4.3470298090863	-1.54800248945404	0.127381198067125	0.224343334309816	-4.57183453230718
226	ZNF770	7.09708544158456	6.06209753049757	15.379880729209	1.57747011518704e-21	6.32540674140945e-20	38.4418035859697	0.759505124430753	6.06209753049757	1.75077165802784	0.0855847565476792	0.119147176795805	-5.38225596955676	-3.60606507113453	6.06209753049757	-7.01222933480959	3.67585146748732e-09	3.57921101303617e-08	10.7866378666093	0.506977481974758	6.06209753049757	0.914538513205775	0.364442835154464	0.456808470028074	-6.24096087734519	-3.53581139190325	6.06209753049757	-6.57523794218488	1.90118600961848e-08	1.17998656355663e-07	9.20754525213494	2.09927464556777	6.06209753049757	4.11958623662679	0.000129286698976263	0.000298523017246256	0.667241088077219	-3.32096623052005	6.06209753049757	-3.47380621228764	0.0010104696503163	0.00429713293881902	-0.861134511395709
227	L1TD1	16.9169796351085	7.84988855204756	15.2651958367023	2.20244614835443e-21	8.52924487490109e-20	38.3985188384973	-1.43135146552028	7.84988855204756	-1.2897672712172	0.202551249840512	0.256430637616608	-6.28465781764428	-7.44431900794836	7.84988855204756	-5.69240061516809	5.08238916154456e-07	3.32247327409059e-06	5.84970612170746	3.26073928281338	7.84988855204756	2.42431096824295	0.0186661592827242	0.0383837739338877	-4.12204447668006	-2.96545217022159	7.84988855204756	-2.30333527128059	0.0250821086072527	0.0421066880113514	-4.41697814663412	2.65578403796244	7.84988855204756	2.1308414287449	0.0376072818189864	0.0547185950466252	-4.81177007932774	-10.9923803121941	7.84988855204756	-4.0819036981153	0.000146415259848547	0.000813995317444022	0.844947335872444
228	TPD52	12.7171596641621	4.66117017110092	15.6711371771546	6.8063182900722e-22	3.05384809622843e-20	38.3833050075324	-1.48746985374144	4.66117017110092	-1.86296929191573	0.0678327121437055	0.0964237506187915	-4.84204097612594	-8.34088850714059	4.66117017110092	-8.5690565455756	1.07603495018256e-11	1.61405242527385e-10	16.2568768845851	-7.34739419025655	4.66117017110092	-6.43529200815967	3.21324765059216e-08	4.3346923604346e-07	8.65338349274796	7.1918889239175	4.66117017110092	8.41826672275743	1.8836411638822e-11	2.23600061237065e-10	15.8368712291522	7.90220588690228	4.66117017110092	9.06758656079788	1.71132173579482e-12	1.73776788425426e-11	18.1054314163229	-10.6355019238432	4.66117017110092	-4.41950721049206	4.72181339379727e-05	0.00030544012840709	1.43827538335134
229	LEPROT	-9.0639430770013	6.25319342190186	-15.3558162569282	1.69168049370485e-21	6.75677091309172e-20	38.30506120467	-3.4074113801247	6.25319342190186	-6.84216934729282	6.97164897317632e-09	4.113919165226e-08	10.0621180766622	5.66261700505178	6.25319342190186	10.5661178339848	7.88111657199837e-15	1.93419692254948e-13	23.5282733582376	-2.03283322810027	6.25319342190186	-3.06574722480862	0.00336831067398045	0.00891998029497943	-2.33862409858884	2.54849304487986	6.25319342190186	4.62207709845613	2.35419435776187e-05	7.76723988785378e-05	2.21054121743611	0.696460457137404	6.25319342190186	1.15390515121045	0.25354963398931	0.304780245743081	-6.11479943506858	5.59661717815724	6.25319342190186	6.26065322636704	6.1756142770754e-08	7.13945873008092e-07	8.11647794807918
230	SDK2	-14.729294450802	3.43896054142492	-16.3758498565533	9.27844596598223e-23	5.36937341838233e-21	38.3025833214613	15.0875920700277	3.43896054142492	20.0214246355097	7.27318381323355e-27	1.45664661128568e-23	47.3131997989188	2.5550928443239	3.43896054142492	2.95942328972203	0.00454605825470852	0.0114437971636694	-2.27332142806992	12.4087140059431	3.43896054142492	15.0811908074514	3.77478299944718e-21	1.42393203145813e-18	35.7771320839826	-6.49375012541416	3.43896054142492	-6.68541355338488	1.25695754026474e-08	8.16461259413031e-08	9.46375355777072	4.29768809125577	3.43896054142492	4.71299237734117	1.71621194338943e-05	4.67869878035904e-05	2.84075349201521	-13.1260424353343	3.43896054142492	-5.13329567039008	3.87789900905675e-06	3.25818848253502e-05	2.48735091361876
231	ARID4B	-5.86008774889467	7.10190743629529	-15.2706801557589	2.16749643495586e-21	8.425935568712e-20	38.2973713390228	2.048344532594	7.10190743629529	6.28516963769814	5.6350951987615e-08	2.69200021573104e-07	7.90009484772195	0.729308757489417	7.10190743629529	1.95805600022828	0.05532527325478	0.0978447487584537	-5.12516826628963	1.58691521035418	7.10190743629529	3.99616711301949	0.000193954011391126	0.00074997023766842	0.128259805564995	-1.02079866519554	7.10190743629529	-2.66127972384703	0.0101945665763983	0.0189408989321868	-3.59741117415548	3.8003762398412	7.10190743629529	10.0748270120705	4.4771180735463e-14	6.12073121866699e-13	21.8205905583997	-1.28405832618857	7.10190743629529	-1.87436658931772	0.0662173317644996	0.134776883297648	-4.71122289041567
232	PYGO1	-17.3709992940226	2.49602845282048	-17.5579253445549	3.71871899422418e-24	3.23719256035669e-22	38.1776055336322	5.93179118628273	2.49602845282048	8.3512076287424	2.41746468599549e-11	2.4977002673861e-10	15.4096153123075	9.29953323582972	2.49602845282048	12.1676350200024	3.35799494915624e-17	1.24821819551665e-15	27.4779716698675	5.07267630913202	2.49602845282048	5.64565807421745	6.03475805055954e-07	5.3915798899078e-06	5.87420800973717	-6.87070957651932	2.49602845282048	-6.8932612606825	5.7523264035467e-09	4.01558906237993e-08	9.90645791391749	0.406643586058085	2.49602845282048	0.397319123234256	0.692676385391845	0.734045259100608	-5.86204749840073	3.53106455323933	2.49602845282048	2.22535142833158	0.030194690087727	0.0716358999635451	-3.50569215848663
233	RTL8C	-9.14190847565442	6.04789215612988	-15.3372475601581	1.78551367296212e-21	7.10369404653094e-20	38.1680283315813	-0.775070801841816	6.04789215612988	-1.55369088718049	0.126018209546691	0.167843005653596	-5.72209794688752	2.26197522312516	6.04789215612988	4.05129370508679	0.000161925832554343	0.000605438547931711	0.393554574141756	1.03379926352501	6.04789215612988	1.66874885912044	0.100874718085437	0.158771287853528	-5.35042712531516	0.867916530175491	6.04789215612988	1.53325513403348	0.130969702917413	0.180819705370598	-5.6364506284827	8.54896389178329	6.04789215612988	15.5572902301335	9.44243128894905e-22	4.83272174261035e-20	38.9217334153127	-2.79567563111274	6.04789215612988	-2.33055950297108	0.0234876569069849	0.0582757090371842	-3.58022468546196
234	RMND5B	7.76728773767646	4.99935160726087	15.398022880211	1.4965621373386e-21	6.1354445606171e-20	38.1503831415523	-0.406159024047291	4.99935160726087	-0.856935298228504	0.395214789370574	0.461189577192861	-6.35173686057232	-3.0573625266839	4.99935160726087	-5.37048075398615	1.64807302874916e-06	9.61375933437008e-06	4.95228191234733	-2.7856955591863	4.99935160726087	-4.08378754768851	0.000145509148468352	0.000587866194823547	0.796810787887131	-1.99183108570735	4.99935160726087	-3.42635663285242	0.00116711537035856	0.0026592997868237	-1.2335974158452	2.5396866104767	4.99935160726087	4.55883740301994	2.92922524155023e-05	7.63055145480573e-05	2.19445159802988	-2.06592615252831	4.99935160726087	-1.87108391800812	0.0666792236656215	0.135473347902325	-4.31629463680132
235	NFE2L3	20.1577891745144	3.70558249008394	15.8189366124836	4.4599385107176e-22	2.11276622007715e-20	38.1326742718995	3.40333719272575	3.70558249008394	2.69414880936347	0.00934935760600254	0.0161374325899829	-3.00847864884645	-13.9235674310344	3.70558249008394	-7.44058791799352	7.32766003529158e-10	7.95652638160392e-09	11.8581324974291	-7.65643372399503	3.70558249008394	-4.16364602148055	0.000111712970931933	0.000466884123488606	1.14211046624466	6.95600122113681	3.70558249008394	5.03653155888563	5.48074695725127e-06	2.06440117454157e-05	3.89025935567108	-6.26896823553861	3.70558249008394	-3.66741722612864	0.00055538175343171	0.0011511117539076	-0.31160971517845	-2.66815819780892	3.70558249008394	-0.769641042802039	0.444819690914322	0.573762790919657	-5.21590383386885
236	C9orf135	26.140439122541	3.2518481549666	16.1078435190772	1.96638783599947e-22	1.02181939334973e-20	38.0118388988278	-2.38146261336685	3.2518481549666	-1.44610233036353	0.153847177296939	0.200849167495614	-5.21637508202926	-5.90605396453539	3.2518481549666	-2.93652664021237	0.00484544529771291	0.0121076693712478	-2.20831617553114	-13.3800210111192	3.2518481549666	-4.393696867458	5.15520005381285e-05	0.000240631129917891	1.61795387327948	-1.82840386050938	3.2518481549666	-0.893231394875894	0.375641470653164	0.448629031262016	-5.63869733234867	1.9375410413324	3.2518481549666	1.01571733627213	0.314230177263079	0.368289338944127	-5.6007309366361	-4.58203871434265	3.2518481549666	-1.06801589071447	0.290198338976027	0.420436711589023	-4.92314290180814
237	DAP	-9.87694789440373	5.09161686928113	-15.4383246320635	1.33155567303372e-21	5.55815349583953e-20	38.010259953386	1.25670535593219	5.09161686928113	2.49456781647127	0.0156573379176872	0.0257875140187005	-3.84220382091281	1.91379395118614	5.09161686928113	3.36575099064931	0.00140086903603458	0.00407536450500205	-1.54433776446011	-0.833684632143064	5.09161686928113	-1.21253246381822	0.230513112611459	0.314223052845226	-5.79038129828686	3.3655191798384	5.09161686928113	5.83164940745264	3.04180906651031e-07	1.48091899342292e-06	6.52359033835103	-3.2022678296929	5.09161686928113	-4.57748960575653	2.74668988549335e-05	7.19152608836756e-05	2.29892099701294	7.37688186928296	5.09161686928113	8.02219335444878	8.25580368280961e-11	1.34321662155616e-09	14.2224687561102
238	C1QBP	6.53482352130179	8.89221351264327	15.1120254067057	3.44792768802142e-21	1.27698703645448e-19	37.9941637089201	-0.0784559708833132	8.89221351264327	-0.192937539903442	0.847721577977721	0.877086984122622	-7.3371954554873	-1.73101511320297	8.89221351264327	-3.6781226291347	0.000537047822483312	0.00174922675791255	-1.10685545187719	-0.431444874735879	8.89221351264327	-0.836809257357973	0.406336296653151	0.498678778336226	-6.78191934842351	-2.60183316616699	8.89221351264327	-5.32887742958721	1.91638134294146e-06	7.8661934305191e-06	4.3857850006061	-1.0585001786939	8.89221351264327	-2.16834321221136	0.0344940637678294	0.0505918003418109	-4.90709757325906	-0.63357421761873	8.89221351264327	-0.876628132329825	0.384517597822093	0.515794520961633	-6.41743891443062
239	RGS3	-12.2581469531515	4.31872951501841	-15.7427302568067	5.54429964412359e-22	2.54363476916211e-20	37.9626960694596	-1.34272444777113	4.31872951501841	-2.33928188335626	0.0229962747631615	0.0364483439873639	-4.05588152975335	2.58936488172464	4.31872951501841	3.98439387805632	0.000201546778270053	0.000737604720330753	0.37839006910222	2.62605308055553	4.31872951501841	3.57741465662288	0.000735045746471951	0.00239107024203667	-0.746754731043109	-5.3546759377947	4.31872951501841	-6.88410540160295	5.95397845331845e-09	4.15066875749818e-08	10.3307818185246	0.896912453638192	4.31872951501841	1.22727594658233	0.22496813830308	0.273816979997236	-5.70880258311676	12.843216922799	4.31872951501841	14.2484559308507	4.55239395080479e-20	1.97302691016795e-18	33.3629447136428
240	NR2F1	-24.7462367656012	5.11348573093522	-15.6674622496701	6.87845848435403e-22	3.0726798097871e-20	37.8575039562757	17.8454058106358	5.11348573093522	15.4133232954487	1.43160543565782e-21	4.28850040063967e-19	38.2343971368992	-13.8364808904866	5.11348573093522	-7.87083996396688	1.45537694197376e-10	1.77521127592848e-09	13.7724520813179	27.2598968524611	5.11348573093522	22.8471850529044	1.12712613265475e-29	1.14797796610887e-25	55.0975689240459	-10.3855943158196	5.11348573093522	-6.8496858930004	6.77725475946725e-09	4.68292671134151e-08	10.2222557621101	15.7497003650561	5.11348573093522	12.9096677396154	2.99080232839667e-18	7.97416798814661e-17	30.95126971609	-11.8866910562456	5.11348573093522	-3.35920914806583	0.00142859978322831	0.00576020933973884	-1.1158149803417
241	METTL9	-7.06011244669755	7.45136821508846	-15.0937174585276	3.63836680457327e-21	1.34263644581807e-19	37.8325682723224	1.92505955968197	7.45136821508846	4.9027797886869	8.81191760186665e-06	2.70492407399071e-05	2.90807224916889	2.37790557737604	7.45136821508846	5.32675936717157	1.93113831667819e-06	1.11383450949739e-05	4.47953056014593	3.40158671473949	7.45136821508846	7.1043651468709	2.5983257324825e-09	4.81162683369714e-08	11.0128065625492	-2.43507953865151	7.45136821508846	-5.18514379190155	3.21924415815468e-06	1.2693767615488e-05	4.02903769395796	1.57376006145329	7.45136821508846	3.35289627896592	0.00145585218489232	0.00279243964277368	-1.84583641772577	0.216880072098267	7.45136821508846	0.285080731276406	0.776657577953113	0.846776729298559	-6.48877252839951
242	TEAD4	14.0197041402558	3.79312991737396	15.58602577695	8.69233183254625e-22	3.79963088903363e-20	37.8242122890472	-6.57359769914766	3.79312991737396	-7.2996546547206	1.24548836814243e-09	8.66482174148266e-09	11.8313031418139	-2.16410283935842	3.79312991737396	-2.1337667398018	0.0373558902491238	0.0706273885627114	-4.16729582466112	-5.62044388218379	3.79312991737396	-4.17541349713133	0.000107425689180139	0.000451560315435293	1.17672194097653	1.48707151252674	3.79312991737396	1.41938876250431	0.161452415203684	0.217311067642331	-5.30718959588235	-12.3066987979776	3.79312991737396	-8.41072823531406	1.93719450036556e-11	1.64556513646566e-10	14.9436201481541	11.1580675658849	3.79312991737396	7.25918816463883	1.45046473769225e-09	2.04328953712249e-08	11.0535592882111
243	YIPF3	-5.82131128336329	6.65613879573004	-15.1156099302218	3.41184130979059e-21	1.26823371314661e-19	37.7776268641102	0.329527899080241	6.65613879573004	1.01258806030962	0.315709611340846	0.379634284711513	-6.5312643885837	0.893278730313023	6.65613879573004	2.39183390835878	0.0202252238971026	0.041783753629207	-4.18134711032024	-0.527369162027479	6.65613879573004	-1.26733585451416	0.210397445922137	0.291788941546428	-6.01874539494867	0.183066964423245	6.65613879573004	0.485843250369506	0.629016462633059	0.689838771607377	-6.78630097654432	3.49198235947708	6.65613879573004	9.20512704770087	1.03436299310097e-12	1.10198609672943e-11	18.7434447732414	1.45082449209718	6.65613879573004	2.27032710809882	0.0271439333623699	0.0655897891567587	-3.95951601312098
244	MCRIP1	-5.3104244797468	7.01809524890783	-15.0650239174355	3.95854017878754e-21	1.45027811945867e-19	37.7075121582172	2.10403077651888	7.01809524890783	7.0192922407012	3.57939259207479e-09	2.26435487889949e-08	10.621770773876	-0.561203401727527	7.01809524890783	-1.60796331416736	0.113593414044205	0.179399739810859	-5.6951495433498	1.75415354213751	7.01809524890783	4.68819848570455	1.87111750459449e-05	0.000100779121016895	2.39795815338161	-1.49411440944986	7.01809524890783	-4.1901330249675	0.000102286956226859	0.000297060920778604	0.732875524866861	3.48083555617694	7.01809524890783	9.91282136575352	7.98703354611422e-14	1.04292226496376e-12	21.2533641973906	0.0267224160908768	7.01809524890783	0.0439998366845467	0.96506456380372	0.976094842420134	-6.42379166073262
245	SVIP	-12.0719232653348	4.58883492424638	-15.4524787738755	1.27808801167612e-21	5.379060495422e-20	37.6783775873583	3.48675295381354	4.58883492424638	5.69143310989739	5.10050468665016e-07	1.97824220234318e-06	6.0092009756133	-10.1398724663945	4.58883492424638	-11.5152497794118	2.98420132812042e-16	9.12735451258452e-15	26.0430192829171	-0.126271974161785	4.58883492424638	-0.154276794784767	0.877958597718883	0.904878396859626	-6.42407835971303	5.59798031012878	4.58883492424638	8.25005986563849	3.52407939784038e-11	3.93247384413723e-10	15.3031000936678	7.96310690487929	4.58883492424638	11.0383970115298	1.52440891912658e-15	2.68617730818412e-14	24.8972784111006	5.29022753706948	4.58883492424638	4.28513723809868	7.44156840316165e-05	0.000451145084441675	1.50747351016513
246	MFSD14C	-7.28654274484541	5.1438164783581	-15.2712244007283	2.16405896565801e-21	8.425935568712e-20	37.6022157133198	2.1071360536413	5.1438164783581	5.24857359091886	2.56180342173135e-06	8.68574162794069e-06	4.4221487122343	0.51948570785643	5.1438164783581	1.11196417230327	0.27101086000933	0.366517807621169	-6.00754077764788	2.59986955908121	5.1438164783581	5.14548775389305	3.71199300205668e-06	2.55105591942964e-05	4.18174137460011	1.1094071501215	5.1438164783581	2.34867808540035	0.0224772157803807	0.0382251532347934	-3.97325634205494	0.486586543980141	5.1438164783581	0.957927527591974	0.34230897285747	0.396905383487401	-6.08326411871854	0.464057730164825	5.1438164783581	0.538818623682634	0.592195511399307	0.704321531168067	-5.88890299654278
247	DERA	-11.1245562149815	5.29950357999214	-15.2155367436634	2.54612130397936e-21	9.74896446655253e-20	37.5211182406385	3.16599232963605	5.29950357999214	5.34968270808674	1.77721407204706e-06	6.20532235989005e-06	4.735968215207	2.02909258417576	5.29950357999214	3.01373953555793	0.00390333871258089	0.0100013848522356	-2.49293472790901	-2.06596350037427	5.29950357999214	-2.70457154511418	0.00909506527526656	0.020758045148747	-3.15222518133981	8.35871164223928	5.29950357999214	12.9772088966787	2.40832729783403e-18	1.72738123439716e-16	31.2779133375283	-5.93277540925593	5.29950357999214	-6.65054922468415	1.43287692823085e-08	6.85479169282819e-08	9.50882535321282	5.56949856856064	5.29950357999214	4.74902250127739	1.51324613914646e-05	0.000112417300709021	2.95846552301098
248	ARID1B	-6.89812446978587	6.46044728196448	-15.0410979050296	4.2472784583864e-21	1.53944950529059e-19	37.5070463247954	0.0213391210151439	6.46044728196448	0.0551473618371106	0.956221748124175	0.965136477669563	-6.99958450503865	0.107963614388305	6.46044728196448	0.243122348776045	0.808818895167217	0.861336307745515	-6.85096313845219	3.97426325493111	6.46044728196448	8.28911927785715	3.04651571818223e-11	1.00742735680799e-09	15.4459058246502	-1.64948414365548	6.46044728196448	-3.58078207081116	0.00072742400535423	0.00173176684397783	-1.04272175156652	2.86933571884714	6.46044728196448	6.27307182090845	5.8956650090416e-08	2.51244134381124e-07	8.02771522728639	1.57470690425965	6.46044728196448	2.16834123165704	0.0344942220250359	0.0796204836890132	-4.16591507458793
249	EPM2AIP1	-7.07587369604128	4.76621132668568	-15.3184189405895	1.88605552228159e-21	7.44553313737908e-20	37.4696559371213	3.41458121336987	4.76621132668568	8.72715520221775	5.99307928549653e-12	7.24169080592225e-11	17.0275704178853	0.65190786191794	4.76621132668568	1.44464997770474	0.154253334499614	0.231550510225286	-5.52220222211107	2.25310075538697	4.76621132668568	4.57284477118029	2.79107870716402e-05	0.000141077601153675	2.30539763104233	-1.47946624755905	4.76621132668568	-3.09727915175116	0.0030781844675216	0.00641131059339622	-2.08998474562809	4.19984036228924	4.76621132668568	9.10789276954923	1.47630380589597e-12	1.52187796184721e-11	18.3096933848761	-1.96409024936369	4.76621132668568	-2.01909144127712	0.0483833809715449	0.105336122607858	-3.99089178001306
250	SLC36A4	-5.42272133449839	5.36423189545426	-15.1535662951986	3.05243012813997e-21	1.14600635347705e-19	37.4361885601349	1.15204786797149	5.36423189545426	3.75200611079857	0.000425431928426027	0.000951894593809114	-0.498726019927538	2.00498611462435	5.36423189545426	5.71736067997634	4.6364434108865e-07	3.06041323006345e-06	6.11782925585631	1.14304946453325	5.36423189545426	2.94151318150671	0.00477872313885877	0.0120167783212253	-2.56506385293278	-0.539909054466809	5.36423189545426	-1.45780484146681	0.150604933694308	0.204276368314893	-5.56721551273885	0.775513509939833	5.36423189545426	2.01735551852496	0.0485699187376615	0.0692544620387908	-4.62329362812272	0.88703343189627	5.36423189545426	1.40172094038968	0.166640539032183	0.276737956961158	-5.16684720107921
251	MTPN	-5.03080425126841	6.95557902182833	-14.976488936748	5.13838561220459e-21	1.80463646414841e-19	37.4312759509653	-0.207392037477131	6.95557902182833	-0.709196777399382	0.481210594461865	0.544751573257096	-6.80504753766014	1.69109980155263	6.95557902182833	5.1053570468776	4.28609954505881e-06	2.29274810222815e-05	3.78488805630245	0.463291089674993	6.95557902182833	1.26968196893072	0.20956637355878	0.290913658810982	-6.05279656169504	-1.88560410236511	6.95557902182833	-5.45660624338484	1.20494527121631e-06	5.18916177054466e-06	5.05650718149617	1.88865773865798	6.95557902182833	5.45292867347834	1.22119687355393e-06	4.09410472585476e-06	5.03786405346236	3.08075176122505	6.95557902182833	5.67168043717683	5.4846511109866e-07	5.35068693155158e-06	6.03318623323262
252	CHD7	-14.3226500654682	6.62396509480235	-15.0189229560946	4.53393779766968e-21	1.61462085556873e-19	37.4248372603423	3.84015029682697	6.62396509480235	5.16286340246701	3.48756356972107e-06	1.14991372475264e-05	3.89509767042559	-1.53257617775163	6.62396509480235	-1.75197777709364	0.0853751333820236	0.141327636746302	-5.41521597189544	5.29242529672079	6.62396509480235	5.96271142551601	1.87242856220086e-07	1.99067692129601e-06	6.86726545741301	-0.0585899436411577	6.62396509480235	-0.065956493634396	0.94765263738861	0.960095703949367	-6.89314132290784	5.8905795625171	6.62396509480235	6.84703370645668	6.84522026844418e-09	3.4737702259145e-08	10.0873550044433	0.890661030796075	6.62396509480235	0.573790404260546	0.568458589175391	0.684125101116785	-6.19528878180469
253	NUP35	9.55400559479682	4.32721883510946	15.279592628075	2.11189554391045e-21	8.30488653078299e-20	37.3948693236314	2.41979716880171	4.32721883510946	4.08766216545324	0.000143662518008534	0.000351731429306951	0.693897940812985	-1.50296173403687	4.32721883510946	-2.15729213750863	0.0353870854561537	0.0674560107375866	-4.20982225234281	-1.48708767874166	4.32721883510946	-1.74051606993701	0.0873844990135439	0.140869123528481	-4.78137333562062	-2.75924697509811	4.32721883510946	-3.67177158210175	0.000547853416095841	0.00134519938354295	-0.411672094625672	-3.84077066400111	4.32721883510946	-4.95328254348356	7.36893694253891e-06	2.14681415216701e-05	3.60825300514708	-2.38373571172079	4.32721883510946	-1.66853398388106	0.100917536074175	0.187357839029434	-4.50380200308922
254	SRSF5	-6.48580884102137	7.99446197592903	-14.9185333469282	6.09834314456029e-21	2.11264030365124e-19	37.3836546656354	3.21775877963977	7.99446197592903	8.73250934101681	5.87566291042661e-12	7.13273262725805e-11	16.8844205883413	-0.973216320681302	7.99446197592903	-2.24976501829076	0.0285030553248953	0.0560539908252672	-4.65433160650487	3.63779730337485	7.99446197592903	8.16854668732092	4.77699579921074e-11	1.5251944268013e-09	14.9065345402272	-0.19646874546943	7.99446197592903	-0.455065693493667	0.650860808239528	0.709061646370691	-6.98905690477238	3.25453708571448	7.99446197592903	7.44411968993522	7.23092653752763e-10	4.43389444820704e-09	12.2097326108766	-2.45459926155698	7.99446197592903	-3.33137751071148	0.00155249263018973	0.00620083821116957	-1.53795432474281
255	USP32	9.92736811847966	4.00644434735446	15.3904616760469	1.52975834773257e-21	6.207405885122e-20	37.3739910759992	-3.22834570773068	4.00644434735446	-5.17566136852886	3.33085896604159e-06	1.10181223024143e-05	4.31517537655471	-1.7646586142502	4.00644434735446	-2.39871835526291	0.0198853043686108	0.0411817456271453	-3.62853784866018	-3.20589581438769	4.00644434735446	-3.42820319738233	0.00116061032190811	0.00354766390415188	-0.968271800898528	-0.611322376328196	4.00644434735446	-0.822816510158426	0.414180584600485	0.486891649833326	-5.97070313786514	-0.995798594418374	4.00644434735446	-1.29433512665539	0.20098066790452	0.247819382882268	-5.46749994038338	-0.121347011364511	4.00644434735446	-0.0843901778498181	0.933053935200015	0.95728338739486	-5.69087962820483
256	FYTTD1	-8.16225153231365	4.99330097000859	-15.2119003808736	2.57333007950219e-21	9.81624226956173e-20	37.3660505450425	-0.755445112911247	4.99330097000859	-1.70045194286732	0.0947184302276952	0.130207478994341	-5.32881829592078	1.66264554862321	4.99330097000859	3.19550241164164	0.00231748752110059	0.00631112577604531	-1.93013206571949	1.00916678902491	4.99330097000859	1.78344733887527	0.0800547392149644	0.130750083211099	-4.97991068471954	-0.155816492453611	4.99330097000859	-0.294511624825681	0.769480395992565	0.815202905010722	-6.5339597258108	1.58308117946649	4.99330097000859	2.8442215486759	0.00624787079545939	0.0106092971076615	-2.78071673191812	4.81861962056391	4.99330097000859	5.64886695343626	5.96407676197558e-07	5.76867253758037e-06	5.92432658098776
257	RAP1GAP2	18.9745527983984	1.81555656863708	17.0339257017906	1.51867244833614e-23	1.10483420616454e-21	37.360411525864	-3.71885398872354	1.81555656863708	-3.30811003384097	0.00166380143427764	0.00331167043348011	-1.24095388981705	-11.2509342217181	1.81555656863708	-6.79812771757474	8.2278446115796e-09	7.55641094399803e-08	8.574200414508	-10.41418021286	1.81555656863708	-5.54836851375992	8.61968473900734e-07	7.34656812274391e-06	4.52858463399087	-0.245144450092997	1.81555656863708	-0.174718441216892	0.861945163675087	0.891079120181766	-5.74556164415148	8.84799928441034	1.81555656863708	7.1885236535333	1.89262100821806e-09	1.07031343524158e-08	10.7283443428158	-2.19343920941406	1.81555656863708	-0.804098437151732	0.424816650644483	0.554997125040285	-4.98849438962412
258	SCLY	10.5475033010297	3.2213772647447	15.7439450602019	5.52506854200765e-22	2.54363476916211e-20	37.3428774807644	0.343044030510017	3.2213772647447	0.532831776548951	0.596305476414019	0.654669750703545	-6.1620133274399	-1.90295525652898	3.2213772647447	-2.52358482015343	0.0145480799778161	0.031479115057161	-3.23764347936387	0.421418674816062	3.2213772647447	0.516019138982051	0.607918128740953	0.68620704213971	-5.95856257203717	-0.905032997535358	3.2213772647447	-1.13950501111153	0.259451831938065	0.327652437481611	-5.4843579360307	-2.38236757920255	3.2213772647447	-2.76925666337489	0.0076536996744087	0.0127833603122093	-2.60182522551861	-6.12161017308889	3.2213772647447	-3.39670348845904	0.00127643656626222	0.00524213968845996	-1.23722225299668
259	ARHGAP5	-7.04997694410466	5.46335348879739	-15.075051577554	3.84352218074489e-21	1.41322286681901e-19	37.242893872336	2.63971934054917	5.46335348879739	6.67515240010844	1.30636867073851e-08	7.27864601284011e-08	9.51953313419913	3.28833026344941	5.46335348879739	7.35477420940769	1.01210284871229e-09	1.07154547963978e-08	12.0480660333161	1.69679177110039	5.46335348879739	3.49348797869898	0.000951546130109143	0.0029921263770181	-1.12083216892197	1.00445570709062	5.46335348879739	2.1659966573301	0.0346820139621527	0.0561762583022464	-4.40689173727637	-2.16842485426935	5.46335348879739	-4.0038238540638	0.000189165022045289	0.000424839195045484	0.466770737475276	0.589104716184416	5.46335348879739	0.708629409581523	0.481559901733106	0.605696388278719	-5.86194550239183
260	WDR12	6.98306227080886	5.34810069290308	15.0238084434868	4.46914167771657e-21	1.60275380237828e-19	37.2324076540303	-0.233983580502641	5.34810069290308	-0.536687863876327	0.593656744720236	0.652253931496829	-6.62251619361428	-2.25016610813589	5.34810069290308	-4.41664698092975	4.76803420652571e-05	0.000202681253728983	1.69659572022901	0.569601876758413	5.34810069290308	1.00285569453304	0.320340800892763	0.411485818778255	-6.02420250529692	-0.763232490382383	5.34810069290308	-1.43601582279572	0.15668522167101	0.211705887864053	-5.56692273492259	-1.70113602501775	5.34810069290308	-3.13793496651204	0.00273859799110067	0.00499688651726269	-2.05487631595812	-2.6041459435286	5.34810069290308	-2.57420567096577	0.0127821194141525	0.0357653533607538	-2.99897556638769
261	RALB	-8.99311503894576	4.73125160509584	-15.2335411207627	2.41564151838468e-21	9.2842674961313e-20	37.2188753433784	-3.33351332474479	4.73125160509584	-6.89308969884358	5.75604150578111e-09	3.46358595710146e-08	10.3622881372661	-0.340895495409579	4.73125160509584	-0.594194477857879	0.55482864919271	0.646115914935714	-6.36602889511017	1.93298418852164	4.73125160509584	3.06769710494862	0.00334965221228501	0.00888442910992782	-2.14396531067906	-0.506651964562679	4.73125160509584	-0.882284157023917	0.38147917870133	0.454446524986978	-6.1451987413596	-5.67313207464089	4.73125160509584	-8.17503968052173	4.66257035929134e-11	3.63060237839314e-10	14.897364814602	16.9143237097821	4.73125160509584	23.8644676932855	1.28452151945487e-30	4.08839114863995e-28	53.7765919854705
262	MYC	17.9773850638832	3.86898088911516	15.2738282485763	2.14768931401283e-21	8.4131598704695e-20	37.2093697260114	-6.60492020691742	3.86898088911516	-5.54039784981186	8.87462191978819e-07	3.28444855570649e-06	5.57688055320456	8.23771924142953	3.86898088911516	6.7594578560907	9.51574946827582e-09	8.62258970946524e-08	9.90160924484321	-11.1146986593913	3.86898088911516	-5.7154489071707	4.66918383582394e-07	4.35163731695333e-06	6.05831396541561	-13.2297736166969	3.86898088911516	-7.02521077136058	3.50051337640528e-09	2.57234695084327e-08	10.4786550679441	-6.88932981180099	3.86898088911516	-4.09152546857059	0.000141843860061683	0.000325965639604749	0.912477682000074	11.6236179894939	3.86898088911516	6.14373029939797	9.55259918015115e-08	1.07269264222535e-06	7.51499097821146
263	NUMA1	-5.92214276115709	5.5365445989908	-15.0316167656852	4.36752355988614e-21	1.57741941338441e-19	37.1950369333507	1.10629109866721	5.5365445989908	3.33758953646218	0.00152398862491257	0.00305367384315061	-1.74723671052695	2.03541613755677	5.5365445989908	5.46575020941685	1.1654573843188e-06	7.00305808807494e-06	5.18622346126414	1.06971348488631	5.5365445989908	2.57403059287826	0.0127878758317826	0.0277943908123571	-3.51036585001374	-2.39662441366226	5.5365445989908	-5.83578759571497	2.99565034042571e-07	1.46056670835983e-06	6.55402018309944	2.15448957921424	5.5365445989908	5.25859332299504	2.47083801992692e-06	7.87644926292986e-06	4.51477691992175	1.95285687449482	5.5365445989908	2.83783174634624	0.00635767615668192	0.0199423873285511	-2.507052696982
264	PPARGC1B	16.015172130889	2.21495252564092	16.3577866051541	9.75771808794452e-23	5.58327858009634e-21	37.1596841157257	-5.00151058636934	2.21495252564092	-5.08225487531321	4.65533947587579e-06	1.4995139962617e-05	4.02139854450976	-3.19271452686937	2.21495252564092	-2.7002405134136	0.00919995286134685	0.0211994388897778	-2.69034850181772	-4.20678164113762	2.21495252564092	-2.83509511345147	0.00640524723044811	0.0154335091180776	-2.32693111428924	-4.45613659031862	2.21495252564092	-3.23468054609555	0.00206659381979606	0.00447068729019897	-1.39869862935306	-1.10281762055324	2.21495252564092	-0.879623904455958	0.382906377354754	0.438092726730866	-5.49444459523459	1.94478883435921	2.21495252564092	0.872653995380217	0.386661578861059	0.518089018268441	-5.05790461970335
265	TTC28	-12.4127263188868	4.09338766473933	-15.4612729413363	1.24596967342915e-21	5.28758380161497e-20	37.1513613712626	3.27783259999228	4.09338766473933	5.40009225281035	1.48004253785828e-06	5.24868845685465e-06	5.02396866399022	1.74275908009796	4.09338766473933	2.4440501196967	0.017772204561011	0.0374650346799037	-3.66400089675798	3.27674753122408	4.09338766473933	4.2386241913751	8.69893956505651e-05	0.0003762152843741	1.26445413383221	-3.88603505342401	4.09338766473933	-5.02275090121484	5.75661479391704e-06	2.15634871923667e-05	3.82185081055457	3.71353728596823	4.09338766473933	4.77624712742472	1.37566259059822e-05	3.83236419180603e-05	2.99842957338562	4.28788487502822	4.09338766473933	3.35809516600079	0.00143337343015561	0.00577716991932525	-1.10271337607768
266	SMARCD3	-13.5221562107135	3.6275475966896	-15.7854631475536	4.9069229244256e-22	2.28205525046917e-20	37.1334557226951	5.92737098368284	3.6275475966896	8.87789832095216	3.43637029270925e-12	4.33698035083565e-11	17.4551707476589	6.52933078076402	3.6275475966896	9.00021997908775	2.19129750401695e-12	3.62311121402803e-11	17.8144370247869	4.7501108661706	3.6275475966896	6.00207251767578	1.61795036846162e-07	1.75120345406818e-06	7.19643594918022	2.7829505248686	3.6275475966896	3.52407911293765	0.000866407346474315	0.00203373100342035	-0.810523893953516	0.270475035299123	3.6275475966896	0.318975680928233	0.750958332368717	0.786398377048672	-6.19345296431963	-6.73808198007168	3.6275475966896	-3.38600611220809	0.00131820608900747	0.00538113387436518	-1.16907551642637
267	DNAJC1	-12.0140536284704	5.8869468897101	-14.996023263839	4.8505902401223e-21	1.70945541853445e-19	37.1313775461926	-2.39265742972917	5.8869468897101	-3.67587198911492	0.000540853488231401	0.00118694091308701	-0.817645058221882	-2.31259127402114	5.8869468897101	-3.06542014998156	0.00337144996905233	0.00877766307126738	-2.41436544847045	13.5668842261892	5.8869468897101	19.0540403949176	7.84074300126286e-26	1.14082810668375e-22	47.7685213746088	1.0573752895377	5.8869468897101	1.43796120760879	0.156134695504317	0.211046034998205	-5.76274072732581	-2.62554821437816	5.8869468897101	-3.0202753802201	0.00383199038971904	0.00681131276078331	-2.41192068007819	4.72059103087197	5.8869468897101	3.7348367040511	0.000449191149151078	0.00216091792089111	-0.188137428013591
268	MTDH	-4.57895606675189	7.48907801646895	-14.8389316454523	7.72091740965803e-21	2.6212514605789e-19	37.1152440775412	0.723976750508048	7.48907801646895	2.70776505296232	0.00901842966487201	0.0156318424330704	-3.67628054478816	2.19349595623703	7.48907801646895	7.30265352951532	1.23150569629216e-09	1.29042032065182e-08	11.7046976372333	1.19337577430909	7.48907801646895	3.58149243665463	0.000725825837888695	0.00236788474019742	-1.14374861033119	-2.34853970507577	7.48907801646895	-7.37285561646302	9.45511984914234e-10	7.91293308656654e-09	12.0046811144082	1.64871466135099	7.48907801646895	5.18063415173322	3.27185868766153e-06	1.0184560126477e-05	4.00885306369243	1.1679326294225	7.48907801646895	2.34891264961657	0.0224643930759483	0.0563824158399541	-3.93885925838552
269	SNRPN	8.08924901601777	7.73838992374943	14.8108487812388	8.39257185589488e-21	2.81178764316741e-19	37.0855642989638	0.542925543720293	7.73838992374943	1.04137275235844	0.302277837899824	0.365034358431315	-6.6202999919992	-3.17002354834198	7.73838992374943	-5.17214287223703	3.37323640873793e-06	1.84315519436673e-05	3.96454368663654	-1.91659445508774	7.73838992374943	-2.83314560726341	0.00643933608854188	0.0155046425678012	-3.14486761635937	-3.87901971996652	7.73838992374943	-6.11808202439331	1.05102563982139e-07	5.60455295370727e-07	7.38520923277673	2.84464029384235	7.73838992374943	4.72272910335974	1.65887478979935e-05	4.53817881657436e-05	2.40383418634843	-2.51117713018418	7.73838992374943	-2.37260635723167	0.0212023380927244	0.0537579819453318	-3.81841793095772
270	GNB1	-4.83932151555427	7.46781706934141	-14.8264248617844	8.01303730165198e-21	2.69349125139688e-19	37.0764694909779	-0.136061615266119	7.46781706934141	-0.480527628865391	0.63276617995032	0.688685995169268	-7.03584559599954	-0.226685981819529	7.46781706934141	-0.697143713782702	0.488661619210802	0.583398302433687	-6.78666621621454	0.450261208475766	7.46781706934141	1.2671169090931	0.210475128574033	0.291817741926139	-6.14287529111146	-0.862230211572173	7.46781706934141	-2.6035001784795	0.011851472591555	0.0216670702468117	-3.77703618769802	3.24521419089663	7.46781706934141	9.80589941224136	1.17215130763858e-13	1.48487077963918e-12	20.8660774384719	2.3688239248397	7.46781706934141	4.59389753112203	2.59533718281361e-05	0.000180515081219677	2.30893705728696
271	UFC1	-6.98386403723375	7.68790545863196	-14.7874726775693	8.99666505371812e-21	2.9847242205902e-19	36.9872119846469	1.51233831391776	7.68790545863196	3.81825137877009	0.000344572448862341	0.000785116418716542	-0.682792244761769	0.253587227042749	7.68790545863196	0.559021864758889	0.578425564114202	0.667792379336108	-6.94902506300484	2.84002646020218	7.68790545863196	5.9115293481063	2.26357229878961e-07	2.34810287223492e-06	6.58230197161455	1.22792009600151	7.68790545863196	2.68124603928892	0.00967317996406279	0.018083946023124	-3.67283809878917	0.121410971634022	7.68790545863196	0.247292762138719	0.805606350873565	0.835890452694301	-6.99722782879486	1.02858096843552	7.68790545863196	1.37680896966998	0.174173488650812	0.286122093856214	-5.68160196011833
272	COL4A5	-12.3916601571874	4.66597103443445	-15.1506209048855	3.07889179061583e-21	1.14866347572975e-19	36.9422879689957	7.04308344519206	4.66597103443445	10.400412687088	1.41149145992336e-14	3.4066446728245e-13	22.8741492690151	8.76167916550386	4.66597103443445	12.1122558113753	4.03365239232831e-17	1.43645977677846e-15	28.4267690825348	-2.51946894427232	4.66597103443445	-2.82441897808633	0.00659399404574308	0.0158023127896219	-2.72724825758088	7.32967359607212	4.66597103443445	9.74626945709459	1.45253737861473e-13	2.88383883064152e-12	20.5631778534348	-9.60082606861321	4.66597103443445	-8.28737022721087	3.0664400907712e-11	2.4905655761168e-10	15.0158104668476	1.37751896330489	4.66597103443445	0.856695299602698	0.395346287418449	0.526556758656062	-5.51225095481433
273	DECR1	-8.0459308378397	5.74511340628361	-14.9249745526153	5.9832328298574e-21	2.07983707754599e-19	36.9409315220288	0.485927657379157	5.74511340628361	1.093184641429	0.279097806276193	0.33998458999199	-6.29092397840642	3.06550941217094	5.74511340628361	6.21124589090761	7.4265569157807e-08	5.64052812730995e-07	7.83112712982157	2.56905166166713	5.74511340628361	4.69761982103215	1.81070766750201e-05	9.78358493024297e-05	2.57690455377181	-0.107822053825195	5.74511340628361	-0.207233671713746	0.836595966389764	0.870083724872843	-6.71524381454052	2.23985990306973	5.74511340628361	4.19842833910095	9.94968251691213e-05	0.00023446903386106	0.930973511594081	-0.206595742622042	5.74511340628361	-0.21109978595869	0.833592918574452	0.88827619540498	-6.11046349395649
274	TOP1	-5.42671121161948	7.71915256263365	-14.7542195962893	9.93282059795511e-21	3.26341218677977e-19	36.8912465578017	2.94364685566785	7.71915256263365	9.35339617365406	6.02313262214112e-13	9.15606056067273e-12	19.1696422834586	0.401199500624395	7.71915256263365	1.0942141517056	0.278650148694573	0.374462562931023	-6.47273581274979	2.50546103319985	7.71915256263365	6.47506883553694	2.76825936432635e-08	3.8204229845073e-07	8.66677517374262	-1.9318839302834	7.71915256263365	-5.14024987070547	3.78239437289851e-06	1.47149299801266e-05	3.83931111241764	2.4098764783069	7.71915256263365	6.40762994393895	3.5640350975169e-08	1.58030898860294e-07	8.39796115710178	-0.901588725896101	7.71915256263365	-1.45974834397896	0.1500716955315	0.255385166079921	-5.51356988159398
275	DPH2	9.18791498340587	3.90006093756054	15.1897767174276	2.74534309565147e-21	1.04333281452277e-19	36.8655025762341	-0.226278540420615	3.90006093756054	-0.395932933241167	0.693692743467362	0.742149221871332	-6.41464621121445	-2.19918399091523	3.90006093756054	-3.25906301580522	0.00192361652310226	0.00538390609722355	-1.56629794385223	-1.17485353582642	3.90006093756054	-1.47676002089172	0.145467156031793	0.215534329965641	-5.1430484701173	-1.84084116678336	3.90006093756054	-2.57887439161878	0.0126294823635672	0.0229166716324483	-3.20213638561243	-2.6842297541599	3.90006093756054	-3.49735494967704	0.000940360060498491	0.00187025331305939	-0.840790892286417	-1.06252799530035	3.90006093756054	-0.763790901744891	0.448269817514658	0.576104491026725	-5.40890704156575
276	ADAMTS9	-28.3967254000928	3.29418598302126	-16.53020309099	6.04257850377182e-23	3.68524922520455e-21	36.8316428937764	-1.7172854904487	3.29418598302126	-1.57618874200116	0.120741558161673	0.161618185027814	-5.2373832667052	24.4368701760269	3.29418598302126	22.576920690076	2.03388079552836e-29	8.6312816260235e-27	53.0150984790212	-3.13396062338552	3.29418598302126	-2.01966747352201	0.0483216188085966	0.0859210348403554	-4.21147685381161	3.75530697285835	3.29418598302126	2.99308794828543	0.00413701027569964	0.00838244930302239	-2.23415150634103	-10.9465040959497	3.29418598302126	-5.25677214140447	2.4871316645545e-06	7.91854829743281e-06	4.41006450726699	16.0022984609914	3.29418598302126	9.12536784326178	1.38477871033732e-12	2.76007263498739e-11	17.3403616684589
277	MYBBP1A	8.59727693917857	3.95331307618219	15.1548189480726	3.04124618375468e-21	1.14600635347705e-19	36.8164238114115	-0.49418590527931	3.95331307618219	-0.920765676465249	0.361210848004781	0.426444011467335	-6.08286207661142	-0.766907648343332	3.95331307618219	-1.20866014138274	0.231985899416537	0.325316864320175	-5.64237034917849	-2.29240215306903	3.95331307618219	-3.09115232446216	0.00313265796137242	0.00837211265719709	-1.91263937771521	-0.123409192324078	3.95331307618219	-0.189304910129253	0.850553652919495	0.881449832619563	-6.3004263684768	-4.89279433540497	3.95331307618219	-6.84112408609148	6.99911902553976e-09	3.54304310512537e-08	10.1070824960116	-0.0275777047578565	3.95331307618219	-0.0207885751187733	0.983489864136557	0.988634451858551	-5.66427641078669
278	ZBTB20	-16.6264444131558	3.85313223950512	-15.711899369523	6.05577701413814e-22	2.74124839506653e-20	36.8099814740169	4.19256856430973	3.85313223950512	5.51301596949411	9.80853929685734e-07	3.60389512043622e-06	5.46245196220118	-4.13344601133377	3.85313223950512	-4.48405160125355	3.78755025502796e-05	0.000164926033978024	2.06662357755446	5.60846392841188	3.85313223950512	6.0760514235382	1.2290042808648e-07	1.37705265133201e-06	7.46051910514745	-1.36166112728822	3.85313223950512	-1.46523819883529	0.148573436750177	0.201843464492538	-5.2903206836934	16.5360522107943	3.85313223950512	20.9740350599723	7.611319478086e-28	1.2920214814051e-25	50.2904854854609	-4.21553315173815	3.85313223950512	-2.02462522559052	0.0477928561934769	0.10427811489515	-3.86122138416592
279	ARHGEF17	-11.2611627327883	3.22434539533313	-15.8200993669443	4.44517647057689e-22	2.11276622007715e-20	36.8037609223082	0.480430438555477	3.22434539533313	0.859994071535738	0.393541232281507	0.459499879718807	-6.03387339298726	7.94841443754742	3.22434539533313	12.967777113024	2.48220091677384e-18	1.09549252517439e-16	30.2417298376049	0.525675850898623	3.22434539533313	0.68760476269205	0.494603468310653	0.581500210636501	-5.88108881358117	0.252741845508761	3.22434539533313	0.375463531924008	0.708766021001847	0.761233989655574	-6.15400161192281	-3.50207480897968	3.22434539533313	-4.39939583984099	5.05629574364275e-05	0.000126128758630912	1.85700826755273	5.55597496925767	3.22434539533313	4.73692018185284	1.57865102063612e-05	0.00011662504459623	2.66860863039026
280	FBLN1	-11.1357194163127	7.60896122541969	-14.7375023405944	1.04401708299521e-20	3.41907202260649e-19	36.8011575202658	-0.589356131175769	7.60896122541969	-0.953314923699852	0.344619157566564	0.409609770079993	-6.72974167428537	9.31580609009145	7.60896122541969	14.3480289957636	3.36498788280816e-20	2.07711524766067e-18	35.7247345051007	2.49891042683703	7.60896122541969	3.35489897232945	0.00144715377412265	0.00430217781361331	-1.8486854002594	2.74728025499054	7.60896122541969	3.995977346649	0.00019407417651967	0.000529789731399849	-0.00792776534428796	-1.52628447976833	7.60896122541969	-1.99268316247311	0.0512889596211228	0.0727799198021052	-5.05443795906746	-1.3106367446622	7.60896122541969	-1.03107045767134	0.30703961557854	0.438597262926708	-5.96617557306347
281	SH3BGRL3	-9.12080871122775	8.7476575833402	-14.6965977370576	1.17952722432334e-20	3.82595056679401e-19	36.7652741608623	-0.918432641491487	8.7476575833402	-1.75412554196961	0.0850029084105309	0.118385699734891	-5.82155317976152	0.375670316026527	8.7476575833402	0.629564604737179	0.531597079281724	0.623822853145381	-7.02518092935424	-0.413497325847951	8.7476575833402	-0.635260440119798	0.527903874421888	0.611850377720605	-6.93328777076862	-1.21619350203216	8.7476575833402	-2.00637354842669	0.0497644513137869	0.0772992125409364	-5.23277237676007	7.15650317589494	8.7476575833402	12.1885530360891	3.13365230741803e-17	7.20457082416539e-16	28.9570400501316	4.13675868867789	8.7476575833402	4.73418659738248	1.59380304160653e-05	0.000117629594049003	2.59256616018297
282	NDUFAF7	8.15311602911554	4.48360436490824	15.0215456430019	4.49903560244138e-21	1.60781324950405e-19	36.7038415021905	-0.250271668987782	4.48360436490824	-0.485184471322824	0.629480644361801	0.685256558660212	-6.44492366751359	-0.565195662750497	4.48360436490824	-0.937516713899982	0.352608816816846	0.450209452084691	-5.9931478243506	-0.769671443075843	4.48360436490824	-1.14445175779373	0.257413374408045	0.344922407360339	-5.67967137082437	-0.971640658472516	4.48360436490824	-1.54884646318926	0.127178233343299	0.17594543691952	-5.2160149165348	-1.95354111763145	4.48360436490824	-2.99200877995233	0.0041495725352466	0.00731833701670765	-2.26305870658421	-3.64279547819745	4.48360436490824	-2.66023136434208	0.0102226403253413	0.0297139245757994	-2.69587120129874
283	GRHPR	-5.2472442137369	6.67509613089704	-14.7209906364641	1.09670847985359e-20	3.5801204702913e-19	36.6654576959138	2.17617257242121	6.67509613089704	7.16812453471706	2.0437302138605e-09	1.36137293840217e-08	11.2105875801731	0.840665991765837	6.67509613089704	2.40546734832709	0.0195570560840235	0.0406010224655075	-4.15283683819997	3.36917025354867	6.67509613089704	9.1228487745691	1.39761125538374e-12	7.04686665152645e-11	18.4537562007936	-0.372025484277041	6.67509613089704	-1.03832516855842	0.303681160828822	0.375454312095357	-6.35255741205072	0.131626812501743	6.67509613089704	0.35345139935809	0.725106984007904	0.763093059735534	-6.79974603606934	-0.898365932223534	6.67509613089704	-1.38755088885363	0.170893859297663	0.282419918375255	-5.387972519149
284	EPC1	-6.14300399586065	6.00937479531093	-14.7707888068998	9.45461487397648e-21	3.1264692367354e-19	36.6321535325689	0.625464297492954	6.00937479531093	1.7880715992889	0.0792967680501565	0.111244846086893	-5.36645634874792	0.167243018215785	6.00937479531093	0.421209516508006	0.675250562790149	0.752618404685671	-6.73483727174352	2.1861258578175	6.00937479531093	5.01819118376756	5.85086445040416e-06	3.74315668513608e-05	3.63951913132619	-0.684228174148373	6.00937479531093	-1.64376929885758	0.105952917943595	0.149692116695175	-5.4421438717844	3.74610374069989	6.00937479531093	9.03560493305573	1.92434300540229e-12	1.93670291601012e-11	18.1449057601265	0.102295255782892	6.00937479531093	0.141837581677868	0.887728762476004	0.927698653549898	-6.23039962444832
285	GABRB3	17.5652147574175	4.42962491084691	15.061219807415	4.00308136974845e-21	1.46133991938666e-19	36.6077977260922	1.31933201122483	4.42962491084691	1.14103147038981	0.258821586030522	0.318253996585882	-5.82632912735401	-8.81115596127365	4.42962491084691	-6.22506052005941	7.05337508672308e-08	5.39734224329636e-07	7.97079621967794	-5.05409753041983	4.42962491084691	-3.1174510014698	0.0029050428761938	0.00785240490818309	-1.81645503969217	-7.31779879027962	4.42962491084691	-4.69366650115458	1.83582045957995e-05	6.19474178906661e-05	2.77956440968944	12.7623895159268	4.42962491084691	10.5810232748195	7.4798182878014e-15	1.1866347236956e-13	23.2138148474923	-10.463884002596	4.42962491084691	-2.99244329813231	0.00414451017544569	0.0140373119889224	-2.0339389968695
286	SLC25A24	-9.479505894471	5.04610817419647	-14.8965551092454	6.50829165767353e-21	2.2318838563436e-19	36.567220192866	-2.58606877445213	5.04610817419647	-5.04065860914941	5.40068876172373e-06	1.71732797496585e-05	3.67792047040484	0.220560434676356	5.04610817419647	0.369779520545121	0.712972806400214	0.783600737367668	-6.58799614256003	2.24630964811972	5.04610817419647	3.45741497489181	0.00106217405590862	0.00328622198038558	-1.18227809478574	2.617064070773	5.04610817419647	4.58675141902111	2.66022684414679e-05	8.64531282949429e-05	2.21269208506874	2.70011158930587	5.04610817419647	4.42638326471532	4.61247579808491e-05	0.000115995224699987	1.72486583465618	4.28152892604818	5.04610817419647	4.41561188050684	4.78486958815462e-05	0.000308439077903748	1.89723811895721
287	VASH1	-15.3289379714119	2.73055507379008	-16.2300746107944	1.39462424120395e-22	7.73367989954855e-21	36.5483595690174	1.93998860401148	2.73055507379008	2.81117275753624	0.00683531882014388	0.0121221873904171	-2.70233319494332	-2.61001475469087	2.73055507379008	-3.10801818461588	0.00298483913314832	0.00787172101789634	-1.84721335373934	2.54522765248028	2.73055507379008	2.80912200142607	0.00687340102650884	0.0163679189747469	-2.53796239495063	-10.9199134322961	2.73055507379008	-8.59594143707204	9.73969097298409e-12	1.25093004489083e-10	14.6585055909016	6.12672916787156	2.73055507379008	7.45321254983679	6.98772084481835e-10	4.30289823485338e-09	12.1885568448004	18.2469207340356	2.73055507379008	16.801473651099	2.8622693979918e-23	1.95652441735211e-21	36.1088591344338
288	FDPS	-5.9033964400327	8.37151900648458	-14.6108755604049	1.52429234374144e-20	4.87982369453252e-19	36.5111721715018	3.71824186564913	8.37151900648458	11.0185354749862	1.63255853051e-15	5.00831585338684e-14	24.9835443943893	-0.261445687758703	8.37151900648458	-0.66344715652821	0.509827262437818	0.603579061714422	-6.98310162221449	-0.00246465002244101	8.37151900648458	-0.00573310186088979	0.995446503461632	0.996522767619099	-7.11653744778568	-1.91882002248965	8.37151900648458	-4.6840776745228	1.89815598206612e-05	6.37412419299157e-05	2.17158251023653	0.841346534426725	8.37151900648458	2.04213962903934	0.0459646970087082	0.0657976723870265	-5.12712704716611	3.52653840022762	8.37151900648458	6.05732048896743	1.31767615730671e-07	1.44462127687501e-06	7.26233680485337
289	PTAR1	8.66809901286027	4.88165891286787	14.8332493353031	7.85227612070311e-21	2.65699110595884e-19	36.4530481588375	0.456550820917961	4.88165891286787	0.821784241226551	0.41476289555586	0.480423074176781	-6.31212288662911	-2.89201853337651	4.88165891286787	-4.33850793316118	6.2157251041786e-05	0.000257032725075351	1.53413876318465	-1.46008094817809	4.88165891286787	-1.91181086074137	0.0611376727333625	0.104495250342221	-4.60502343940441	-2.29675577241753	4.88165891286787	-3.35438323948827	0.00144938906912511	0.00323586752938169	-1.37913639041123	-0.883727834600178	4.88165891286787	-1.28043631799845	0.205788070155676	0.252950940687371	-5.64935203095078	-1.59206674520592	4.88165891286787	-1.24462036466334	0.218571063107881	0.340754060577647	-5.14794133192557
290	NUDCD1	6.04902688713621	5.053199665534	14.758414631713	9.80947637275104e-21	3.23331769762037e-19	36.3524980649492	0.772075399676165	5.053199665534	2.024800854066	0.0477742167624722	0.0705188982211275	-4.72934140358144	-0.779000853538435	5.053199665534	-1.73569159125185	0.0882419325362247	0.145427845126448	-5.10420708749436	-0.255951648419735	5.053199665534	-0.51322005363236	0.609861505923932	0.687714729609748	-6.33191379418243	-1.91378192669121	5.053199665534	-4.05334750175557	0.000160837248900376	0.000448433446496121	0.625788619711516	-1.36694359540661	5.053199665534	-2.86861152184694	0.00584467184767407	0.00999294657857317	-2.69679965632499	-2.50542426275638	5.053199665534	-2.8337983582189	0.00642790352475884	0.0201192985247906	-2.39087827879785
291	RBM5	-6.45326922602614	5.57270947837254	-14.7175941392943	1.10787728758166e-20	3.60502561470262e-19	36.3187686168322	-0.0832370378640128	5.57270947837254	-0.226347349344412	0.821773917390888	0.854018021022245	-6.82446886338118	0.985822411913997	5.57270947837254	2.36500360972741	0.0216002117235568	0.0442563179248492	-4.06980682232924	2.37057387821324	5.57270947837254	5.20438310035941	3.00398386857082e-06	2.14254731802478e-05	4.32744661490896	-1.26736325029531	5.57270947837254	-2.86410553354535	0.00591729817562033	0.0115676932665438	-2.84694514772129	2.65052913004088	5.57270947837254	5.98571094968182	1.71926990175382e-07	6.70140220029187e-07	7.07259177046742	1.79694409401735	5.57270947837254	2.33024131466956	0.0235057579962758	0.0583064162669433	-3.63222721661701
292	ATOX1	-5.497264171291	7.57933713127358	-14.5427850305453	1.86983635804689e-20	5.85977947898696e-19	36.2565519407199	-0.827341310622511	7.57933713127358	-2.52376153120567	0.014541548450944	0.0241647366573445	-4.11640711595371	1.43270052516448	7.57933713127358	3.84504120439213	0.000316257240528386	0.00109934470811659	-0.445462140424433	-0.129585947813212	7.57933713127358	-0.313908053406657	0.754783417459289	0.810230723737654	-6.90065824415852	4.20903187428842	7.57933713127358	11.5793774229097	2.40173764973326e-16	9.98436651531968e-15	26.9669104750911	-0.766012250009786	7.57933713127358	-1.91748850740356	0.0603971624131723	0.0845327881239742	-5.18882388989955	1.57847128028361	7.57933713127358	2.63435305581515	0.0109384335730276	0.0315067720422188	-3.32402998523294
293	TRNP1	13.7686031137417	3.42027105860402	15.1749395715825	2.86719256995803e-21	1.0855894544618e-19	36.2265971305171	-4.25063900598164	3.42027105860402	-4.75256917157935	1.49458674972058e-05	4.40167049875193e-05	2.94373742001572	-2.16050562417489	3.42027105860402	-2.02253302184358	0.0480153850171763	0.0871257253518512	-4.25125844810691	0.2017336601695	3.42027105860402	0.175693923810885	0.861182397084601	0.891376292104336	-6.08505194822921	1.96626811932448	3.42027105860402	1.91774096147426	0.0603644140907994	0.0916944903079481	-4.46339739515254	-1.87046709834106	3.42027105860402	-1.73606164504864	0.0881759186046679	0.118792557009066	-4.73556188131268	-7.65499316473807	3.42027105860402	-2.96221780987151	0.00451072076178494	0.0150529786889842	-2.14936045875937
294	DYNC1H1	-6.04579497500996	7.34784645259229	-14.5303494609808	1.94104864194962e-20	6.04574324717337e-19	36.1943937151924	0.959342468779814	7.34784645259229	2.69683395015749	0.00928322999800797	0.0160416860416884	-3.68500125690806	-1.5361463386017	7.34784645259229	-3.69608420185997	0.000507581385267753	0.00167304738153789	-0.847582910340125	1.10127434145639	7.34784645259229	2.48819423667869	0.0159110016603496	0.0334752224562407	-3.97902565741715	-1.9794810574725	7.34784645259229	-4.69592614646939	1.8214250223158e-05	6.15501454953098e-05	2.36268598368974	6.95676773061415	7.34784645259229	17.3200648631231	7.01746240151241e-24	5.21699668316817e-22	43.9237564588224	0.54403783023379	7.34784645259229	0.790056675573694	0.432902153231399	0.562601560630573	-6.19369619058173
295	INPP5J	15.9562690994072	2.26015992424583	16.0068538760141	2.61525971512789e-22	1.3251950347551e-20	36.1888153914547	-2.26229597478397	2.26015992424583	-2.27676279842911	0.0267305147341493	0.0417623443154842	-3.67322060552925	-2.0379388181246	2.26015992424583	-1.77256820852639	0.0818618374817093	0.136458725818529	-4.4852944705487	-3.78709496444335	2.26015992424583	-2.82481026978856	0.006586986514274	0.0157929514237007	-2.36649767074421	-3.16796384423115	2.26015992424583	-2.37193256328906	0.0212373329016031	0.0363533169080382	-3.321289562311	4.63865970552894	2.26015992424583	4.05307894737333	0.000160979189024578	0.000365894452179274	0.811798015825849	-9.33963520335307	2.26015992424583	-3.30716335335633	0.00166848622705196	0.00657644435856202	-1.77786545634925
296	PET100	-5.02939103784125	6.14794581457899	-14.5868482819017	1.63814441259117e-20	5.19766381378227e-19	36.157746818143	1.6438148376025	6.14794581457899	5.61213089289273	6.82468758509458e-07	2.57537766039972e-06	5.56980760798778	0.130641369228375	6.14794581457899	0.38175900954509	0.704117320013798	0.776970195486515	-6.74448090536975	1.13859712974903	6.14794581457899	3.07159418444354	0.00331265034271697	0.00879315708641448	-2.37110663316178	-0.850250750652338	6.14794581457899	-2.42092576768548	0.018823467667306	0.0326215787292006	-3.98458640388882	2.36169421257286	6.14794581457899	6.69582761563937	1.20871607243984e-08	5.876264056229e-08	9.60608601033276	0.604894239340823	6.14794581457899	1.04750984537855	0.299465357798419	0.430677021911451	-5.77035224344568
297	UBB	-4.81104005614509	9.6588650814295	-14.4862673720902	2.21638904798287e-20	6.73848431453896e-19	36.1423035987852	1.23969412688543	9.6588650814295	4.30074655529705	7.06061159246604e-05	0.0001826576811513	0.599629179065216	1.76436315383801	9.6588650814295	5.32962522472376	1.91119792102668e-06	1.10536915534678e-05	4.23056365435061	1.60901258241499	9.6588650814295	4.52278935683381	3.3161623489929e-05	0.00016403649113401	1.51256602366313	-1.66178131321397	9.6588650814295	-4.81982243654171	1.1805503196107e-05	4.12908825729224e-05	2.49576811620443	1.52649210371906	9.6588650814295	4.41855491933987	4.73715358765858e-05	0.000118895784352643	1.1386026528891	0.333259402501582	9.6588650814295	0.662523036726556	0.510414595355566	0.633203505166211	-6.72650879619902
298	SERTAD2	-10.3469893919112	3.88790707831771	-15.1526633460035	3.06051770393478e-21	1.14600635347705e-19	36.1310300054236	-1.53909789107	3.88790707831771	-2.71664474487187	0.00880844408727532	0.0153200141784322	-3.04729769684096	-2.33154431771583	3.88790707831771	-3.40696095332196	0.00123756592651081	0.00366519597601414	-1.14645551893352	3.73596800945624	3.88790707831771	5.42851972691222	1.33468764193639e-06	1.06785495939687e-05	5.21291080428938	5.39709339832731	3.88790707831771	8.60894325686643	9.28158869994445e-12	1.19813664016393e-10	16.4542254782031	4.57694665154244	3.88790707831771	6.73709090473691	1.03505881240246e-08	5.08541920131167e-08	9.7898260179797	0.507623541371014	3.88790707831771	0.357408940444606	0.722159293337106	0.808202396064368	-5.58188308416014
299	H1F0	-8.98921407020321	6.61468472957413	-14.5104863338453	2.06054468948238e-20	6.378920262121e-19	36.0107823159837	2.92444554456949	6.61468472957413	5.88555151263583	2.49209771565301e-07	1.03178923715146e-06	6.47280393172412	-0.955429753478043	6.61468472957413	-1.65178985687307	0.104300145421222	0.167001569111011	-5.59071641824324	1.84372217198447	6.61468472957413	2.97772930529677	0.00431917803990668	0.011022507726497	-2.72807717862306	0.379701993881296	6.61468472957413	0.65232538412969	0.516919875056194	0.586761717335715	-6.70317194840197	4.2328601407959	6.61468472957413	7.21789057122331	1.69449039017207e-09	9.67398241250144e-09	11.4672523811567	0.563913972450088	6.61468472957413	0.568183326225032	0.572232741628581	0.687205574046351	-6.24300926904508
300	IMMP1L	-7.45324510456585	5.57567848280687	-14.6099799749921	1.52838857001068e-20	4.87982369453252e-19	36.0023804672022	6.23951522016895	5.57567848280687	14.6697842453985	1.27790561771651e-20	2.60309374328853e-18	36.4509263327545	-1.49719321904349	5.57567848280687	-2.96534298225799	0.00447150499225321	0.0112868099990332	-2.61157025055847	2.93008809095399	5.57567848280687	5.56005898759512	8.25881881082031e-07	7.05671724733263e-06	5.57092774139429	0.573771922050454	5.57567848280687	1.13739166507128	0.26032619372452	0.328593665024691	-6.04627703532104	1.43954123864403	5.57567848280687	2.65201418269638	0.0104451470065204	0.0169535971731331	-3.31817215336335	-2.23247814820809	5.57567848280687	-2.29329468547522	0.025694035092754	0.0628394401671292	-3.64589901461556
301	DAAM1	-9.04471048690244	6.43058709249344	-14.5094373909466	2.06705854452037e-20	6.37969432604241e-19	35.9590479987662	1.32468929338708	6.43058709249344	2.55626152074146	0.0133845136103562	0.0223660822184542	-3.87879830732998	-0.0867108274786155	6.43058709249344	-0.143643199459307	0.886309445950038	0.920377417108599	-6.84878551095816	-7.70587166920171	6.43058709249344	-10.4734014767796	1.09150368400481e-14	9.42115679795676e-13	23.1175239052285	0.592523454995407	6.43058709249344	0.985978228375849	0.328479699201097	0.400666555253075	-6.36815865244189	9.04953412655013	6.43058709249344	15.8309954683678	4.30922787433601e-22	2.28591072396418e-20	39.794737454317	5.87054610865016	6.43058709249344	5.98314368302964	1.73572962285085e-07	1.86481078151223e-06	7.13633329385504
302	SIRT1	10.7647084783741	4.10561252888214	14.8282939526529	7.96867896958933e-21	2.6874501756711e-19	35.9410327889852	-1.11825945740746	4.10561252888214	-1.59644427470349	0.116144182663926	0.156182796465816	-5.24220839086833	-1.39261209791413	4.10561252888214	-1.67950988226135	0.0987493326698312	0.159417015888767	-4.97633037614771	-2.13062376525691	4.10561252888214	-2.16595543321673	0.0346853238755743	0.0650949002529435	-3.97704413263019	-1.80508780474691	4.10561252888214	-2.09796202641296	0.0405361215735081	0.0645901749415175	-4.20702003648417	-0.106128631316922	4.10561252888214	-0.12599103025044	0.900200398834984	0.919336314261939	-6.30914645478445	-4.21199672173173	4.10561252888214	-2.29574881667838	0.0255432545576456	0.0625379922282742	-3.39393485602178
303	SAP18	5.15661129467582	8.99287029734989	14.4136330811131	2.75929054746039e-20	8.21736088476143e-19	35.931248700517	-0.738606554373867	8.99287029734989	-2.20171339903134	0.0319164310046121	0.0491263185404222	-4.99891869299738	-0.991126330235929	8.99287029734989	-2.57418363282131	0.0127828438798351	0.0281365825195838	-4.06535905199104	-0.143340262716706	8.99287029734989	-0.341473591722601	0.734053774945875	0.793161224042407	-7.08592504682017	-2.62485246599054	8.99287029734989	-6.6052607459545	1.69854213466517e-08	1.07118586015881e-07	9.0232118207906	0.348638341058692	8.99287029734989	0.880607214165609	0.382378450392181	0.437567939378129	-6.81518629044705	-1.00732402241746	8.99287029734989	-1.69814839181801	0.0951550773402306	0.178975893390628	-5.39098012893377
304	TUNAR	22.3348804905364	2.36463398396487	15.8145129866729	4.51655570452158e-22	2.12968147456261e-20	35.9311581223162	1.15277270594151	2.36463398396487	0.81336227390134	0.419532347951197	0.485340409346086	-5.74554040216633	-5.74710172891499	2.36463398396487	-3.11326824343438	0.00294017659288096	0.00777003077283148	-1.70103141997076	-14.5823051834261	2.36463398396487	-5.84037824592441	2.94525692429277e-07	2.92356239836629e-06	5.5310406260915	-1.23843978655836	2.36463398396487	-0.691830890403394	0.491966110509018	0.562554713768311	-5.62702738804108	1.15544624384972	2.36463398396487	0.661452411855678	0.51109549524799	0.565898446369425	-5.67704574533302	-3.07525274142821	2.36463398396487	-0.843642553814188	0.402538910593859	0.533937232954992	-4.99583953995846
305	NOP16	10.5454071537972	5.14778400761573	14.5522944537433	1.81717198650313e-20	5.71231379090566e-19	35.835963523091	-1.86213580580776	5.14778400761573	-2.67169935657209	0.00991935107087447	0.0170397353106521	-3.34428648598436	-1.69131747135592	5.14778400761573	-2.09576803559185	0.040738447467954	0.0760207195788038	-4.47021172287509	-0.307081130800769	5.14778400761573	-0.329740370290245	0.742854006161586	0.800038918553003	-6.38301886551117	-1.60733892445074	5.14778400761573	-1.87760312038947	0.0657645866752585	0.0987486827786389	-4.81044811598873	-2.66470101229007	5.14778400761573	-3.01173804729914	0.00392543461753331	0.00697011010801548	-2.32007366484141	-2.41283280909193	5.14778400761573	-1.44847860018616	0.153184444376674	0.25951157118703	-4.91696297547707
306	IFT81	-10.5414363354135	5.04684017107686	-14.6614946486796	1.30997313162564e-20	4.23557979225624e-19	35.8320386073866	7.45584776258473	5.04684017107686	12.9228490150687	2.86687441529603e-18	2.26349735812326e-16	31.1424455770455	0.727917061487608	5.04684017107686	1.06636428897333	0.290937301361575	0.387396576594017	-6.05067783622779	5.1999451037228	5.04684017107686	7.36131414241217	9.87492055217689e-10	2.11593147030542e-08	12.0839218278676	-4.42990912486092	5.04684017107686	-6.07973424467462	1.21228032255184e-07	6.39744823066864e-07	7.4593346294643	5.21744657599498	5.04684017107686	7.7269632989375	2.4970513582092e-10	1.68990102160008e-09	13.4127107398866	-3.62981104351573	5.04684017107686	-2.48046494923374	0.0162235996309169	0.0434377923871948	-3.15094300911423
307	ITPRID2	-15.8288602571385	4.09652562159006	-15.0028571485055	4.75381317348959e-21	1.6811662212497e-19	35.8022409782243	-0.648688016511422	4.09652562159006	-0.810872854777006	0.420948453824355	0.486614440416239	-6.2586490255896	-0.320336306861216	4.09652562159006	-0.341348327594176	0.734147539511295	0.801314592966219	-6.38702439756291	2.38470938212036	4.09652562159006	2.161224304977	0.0350670357394339	0.0657143990811655	-4.08428010928092	7.11879191122827	4.09652562159006	8.24665574833729	3.56910497425684e-11	3.97282340577114e-10	15.2604272261612	-4.21027267230824	4.09652562159006	-3.64942287121238	0.000587555350931382	0.00121310586848492	-0.424332110151961	11.5046559594708	4.09652562159006	8.49759619157231	1.4027488621017e-11	2.4803814514767e-10	15.571065769256
308	NCAM1	-23.4775381858054	3.92365547040884	-15.4394512207459	1.32721807003652e-21	5.55815349583953e-20	35.7429380078323	-4.33536711540292	3.92365547040884	-4.10558641577	0.000135410832010857	0.000332969416714288	0.795364763030716	12.1091762048155	3.92365547040884	11.1518955791021	1.03134321887916e-15	2.91784185674562e-14	25.1470725574791	10.4927842240045	3.92365547040884	8.77617441662924	5.00050139272221e-12	2.10454986301139e-10	17.0307772171488	-10.2379237044679	3.92365547040884	-6.63434360507911	1.52280741294232e-08	9.66342274194237e-08	9.29885852657493	19.4365726685984	3.92365547040884	18.4044062489653	4.07330351964978e-25	3.87725199510589e-23	44.9680973311595	-3.98770409174214	3.92365547040884	-1.40700174762202	0.165076517273425	0.274633180076746	-4.73508306008301
309	SLC25A19	12.7315748345912	3.21094917528275	15.0296984660165	4.39226931422763e-21	1.58075134153387e-19	35.7058622961874	-0.331709453085239	3.21094917528275	-0.403182790589974	0.688383434219127	0.73748725947181	-6.23352126413939	-3.8596208664624	3.21094917528275	-3.922049754034	0.00024678121320617	0.000883157644590596	0.40297984790435	-4.99863221184509	3.21094917528275	-4.06277336869884	0.000155931287369806	0.000622807906612342	0.841014829476927	-0.320520943006044	3.21094917528275	-0.318501394264393	0.751316062713654	0.798513419465571	-6.07633027990252	-4.86527819529705	3.21094917528275	-4.06854349929828	0.000152999784046929	0.000349395246752908	0.860143885363908	1.64418683510465	3.21094917528275	0.853717330930218	0.396980210750062	0.52811434776507	-5.23095362350342
310	SETBP1	-14.4782911485495	3.45751931133784	-15.3959277300524	1.50568669405054e-21	6.1354445606171e-20	35.6765105532768	0.707346505338579	3.45751931133784	1.02986804306926	0.307598687348288	0.370888200620612	-5.92907805009383	4.14217237549536	3.45751931133784	5.44346743728546	1.2640090395283e-06	7.54626733153326e-06	5.25892052534477	2.42814290523787	3.45751931133784	2.75366928119761	0.0079803906469125	0.0186209115094625	-2.75525896454271	-3.70770049804523	3.45751931133784	-4.17741472198968	0.000106712621321733	0.000308857075351478	1.15381992741838	9.4945795739105	3.45751931133784	12.4450854584784	1.34824243930446e-17	3.26172191076387e-16	28.8627878053097	1.41375028661239	3.45751931133784	0.874874522420407	0.385462718723933	0.516842784386948	-5.32106005789338
311	STARD3NL	-6.36577062011301	6.163036773573	-14.4223057432554	2.6879504401657e-20	8.05199271561402e-19	35.6612496768544	-0.465726787854364	6.163036773573	-1.23521347623991	0.222023708962716	0.278136341598817	-6.17585456542588	-1.07659040943231	6.163036773573	-2.4591182620114	0.0171159374930946	0.0362499112845016	-3.91979012554852	0.709175902920742	6.163036773573	1.47580948880029	0.145721470078404	0.215816951104922	-5.63785788272842	-1.98704346558078	6.163036773573	-4.40942973714015	4.88663086140753e-05	0.000150956431068959	1.57815169287694	6.32911651335722	6.163036773573	14.9007970690961	6.42704836905124e-21	2.71616131281273e-19	37.0869616828522	2.8568388667025	6.163036773573	3.88686419298064	0.000276476168621514	0.00142217665525764	0.241916552816908
312	AKAP13	-7.22489942995247	5.94418522733059	-14.4415597819285	2.53617762611247e-20	7.66497600058027e-19	35.6595333529919	-1.21140192408586	5.94418522733059	-2.88653589774389	0.00556386977791105	0.0100421785731037	-3.00840879381025	-0.144735965076575	5.94418522733059	-0.303237268758772	0.762857940577241	0.824547185055629	-6.7589154738055	3.02201456342983	5.94418522733059	5.81712723892472	3.20944387719291e-07	3.1521876460183e-06	6.45068309147947	-1.0096626414296	5.94418522733059	-2.02045803559507	0.0482369655466149	0.0751903113088877	-4.77293485244523	0.337441290243603	5.94418522733059	0.663197748447267	0.509985740243269	0.564771639053788	-6.52204641120127	6.23124410687107	5.94418522733059	7.98322751319286	9.55217690730971e-11	1.54182126467432e-09	14.1926019661372
313	H2AFY2	-16.4990907203236	6.40470079133416	-14.4270687913015	2.64956852178894e-20	7.96042931988802e-19	35.6505815129609	6.5251853061927	6.40470079133416	7.5540999717386	4.78112643527357e-10	3.62859707475867e-09	12.6481859050569	4.0056925802577	6.40470079133416	4.07658432513373	0.000149003379991605	0.000561450027826304	0.380970694845495	4.08009289125826	6.40470079133416	3.91251306023216	0.000254511344785233	0.000954769077951234	-0.0780773679949611	3.99065318923115	6.40470079133416	4.0469346991219	0.000164259903375072	0.00045622773817156	0.299471515194643	0.0227806834008444	6.40470079133416	0.0211966323781779	0.983165836957952	0.986070315058271	-6.84011547052452	-2.12531393001711	6.40470079133416	-1.08227301566551	0.283873360835167	0.413221174841053	-5.68219010483427
314	WDR74	7.75238008150909	5.4540213718539	14.4358320060192	2.58039719154617e-20	7.77554597511768e-19	35.6230274753641	-0.872912309366373	5.4540213718539	-1.73123441979993	0.0890402687889374	0.123451556985479	-5.32628322978852	-1.11473466817565	5.4540213718539	-1.92516835537331	0.0594076793437927	0.103820729944497	-4.87638537153518	-0.0654824685258601	5.4540213718539	-0.100341687142329	0.920439475660106	0.937371122207421	-6.54815562440807	-3.27070129266128	5.4540213718539	-5.10674798353569	4.26481228616043e-06	1.64347760630132e-05	4.03814958626402	-0.76362877451003	5.4540213718539	-1.23176252590058	0.223300337096486	0.272144780821791	-5.85742971002055	-1.66492056826989	5.4540213718539	-1.49257623787613	0.141286598379065	0.243692464774052	-4.9893088492139
315	COMMD8	-7.63206703429915	4.88318516217358	-14.5561663263912	1.79616213207333e-20	5.6637496331786e-19	35.531015452011	2.49774797684522	4.88318516217358	5.67801199093094	5.35849600171744e-07	2.06415589173571e-06	5.95625579894131	2.92404302157541	4.88318516217358	5.91534659710891	2.23179242216204e-07	1.5708919018466e-06	6.84782548945573	-0.221083277919642	4.88318516217358	-0.38484635311755	0.701841698161807	0.765830050972573	-6.39437971806771	4.57355781711623	4.88318516217358	9.26041374084054	8.45269097527502e-13	1.40901239906998e-11	18.8975644581744	-2.54227490152846	4.88318516217358	-4.22527694769711	9.0963124871135e-05	0.000216159455625877	1.20956807726273	0.400076398210395	4.88318516217358	0.396661128939008	0.693158757764383	0.785471956812443	-5.85649052440754
316	BIN1	-12.6345992812713	5.45439048393129	-14.4886457281055	2.20056970213051e-20	6.71041988508959e-19	35.5094387884013	-2.03660074852424	5.45439048393129	-3.05245300312204	0.00349813774842692	0.0065674715147886	-2.53828278656974	7.84891860753774	5.45439048393129	10.7332973809535	4.39220500971805e-15	1.13252172212604e-13	24.0731412780989	-5.26817222055961	5.45439048393129	-5.85694361901672	2.77030271460489e-07	2.78809616089435e-06	6.6502902201523	2.06421339371534	5.45439048393129	2.60966122457756	0.0116637784767672	0.021366112191704	-3.489316805981	-2.32197849117636	5.45439048393129	-2.69562275614033	0.00931300509999138	0.0152742281712419	-3.22184579813909	12.3482187402784	5.45439048393129	11.7583859346101	1.31366544152959e-16	4.09164603118619e-15	26.9789292895259
317	FXYD6	-17.4659398370701	5.65233870853068	-14.5039886979068	2.10123186695578e-20	6.46557298034581e-19	35.4890580563558	6.06603736854261	5.65233870853068	6.99994934926073	3.84978578519866e-09	2.41441306787244e-08	10.6695190518884	3.98606902174934	5.65233870853068	4.02457379893885	0.000176753691685839	0.000655346323196313	0.333228610895472	8.37859954670313	5.65233870853068	8.17886593825496	4.59643352530129e-11	1.47680364211967e-09	15.0511674890348	-8.81289544186843	5.65233870853068	-7.52190740359597	5.39644146550727e-10	4.75045430649884e-09	12.667593423236	9.35279309293092	5.65233870853068	9.69997025337243	1.71617399711714e-13	2.10847191322533e-12	20.5063606254395	-1.50466375098743	5.65233870853068	-0.741597017345646	0.46149983104893	0.588802594860485	-5.82650386533814
318	ODF2L	-8.40234939990769	5.65211194937996	-14.3990831794215	2.88331474044571e-20	8.53679088123244e-19	35.4241344016579	0.449208214070954	5.65211194937996	0.9294854804443	0.356716286119249	0.421969265287405	-6.43481451851332	1.70533443501967	5.65211194937996	3.10925140879691	0.00297429124327886	0.0078459353309493	-2.28984065192289	2.30144898784219	5.65211194937996	3.80108786402597	0.000363977032732821	0.00130210961657316	-0.248139494941505	0.261630800217996	5.65211194937996	0.469556828111209	0.640535797815919	0.699946804233093	-6.62129172246149	3.34932108633591	5.65211194937996	5.89061556832585	2.44582232781879e-07	9.25016725170233e-07	6.71267313140507	0.335405876420957	5.65211194937996	0.318682047790417	0.751179798452671	0.829441267046884	-6.07398601420288
319	CEBPZOS	8.33744474061985	5.42217270446446	14.3972043061571	2.89973713595274e-20	8.56052832744307e-19	35.4132977544416	0.827723355508818	5.42217270446446	1.49661019890249	0.140235666368054	0.184784561657265	-5.62157553440989	-3.54703507333114	5.42217270446446	-5.3743145721447	1.62529989830235e-06	9.49723434550171e-06	4.96062735414796	0.16964538750174	5.42217270446446	0.239804556766682	0.811377020100607	0.854588929650949	-6.4666113354654	-3.8470147627402	5.42217270446446	-5.66250720585279	5.67265915989937e-07	2.60135225320014e-06	5.98346778087744	2.82321807025001	5.42217270446446	4.35681271237615	5.8423848408211e-05	0.000144148957373457	1.53364995283969	-4.76398171780907	5.42217270446446	-3.2850653265253	0.00178144919084657	0.00693685812479965	-1.2748088871004
320	HSPA2	13.7488953165687	3.18199719768451	14.9290225563548	5.9120209609153e-21	2.06212100982611e-19	35.3930225640159	-4.81586067275915	3.18199719768451	-5.2449329567797	2.59566650248466e-06	8.78885084036111e-06	4.5909565277931	-0.161888409968113	3.18199719768451	-0.155073496617957	0.87733347574889	0.91413211769846	-6.15869204743733	-6.05433680737311	3.18199719768451	-3.98665443326927	0.000200066998963709	0.000771557131558264	0.593766393930174	-1.17308892918166	3.18199719768451	-1.04064900807384	0.302610698852531	0.374358067267464	-5.56920084207267	-7.58198053326325	3.18199719768451	-5.6669264279073	5.58130263968521e-07	1.9938817041457e-06	5.8336441296837	6.0382600359766	3.18199719768451	3.28349171673253	0.00178976289793169	0.00695753248680696	-1.29796647390883
321	PPM1B	8.98892923120255	4.65389031576016	14.4943912356486	2.16282467516046e-20	6.61512592087365e-19	35.3319122132488	0.840721432380781	4.65389031576016	1.42136717405828	0.160879346719242	0.209023842268967	-5.58982845566818	-4.44137862199558	4.65389031576016	-6.16387122836436	8.8618077152919e-08	6.63170547981249e-07	7.77431511116675	-0.988607030375546	4.65389031576016	-1.25999388512649	0.213014048712709	0.294535444764994	-5.54767637548978	-1.71858404355305	4.65389031576016	-2.35412613012335	0.0221810739718169	0.0377783007362801	-3.77212692278483	2.79277756059757	4.65389031576016	3.98707348819512	0.000199793836348767	0.000446739895326496	0.469940111178802	-5.47385852825673	4.65389031576016	-3.44666790195421	0.00109742886368385	0.00461491039497112	-0.894882107391638
322	PLAAT3	18.2000820855402	6.62992072364138	14.2388687495958	4.68711807813983e-20	1.32606382294039e-18	35.3093818157834	-1.41168821406232	6.62992072364138	-1.10203849444791	0.275264327909549	0.336117755587887	-6.33891236784047	-8.96479531172745	6.62992072364138	-5.57439489427136	7.83663456939513e-07	4.88172006662321e-06	5.57740181954169	-3.30273684336419	6.62992072364138	-1.86196598081792	0.0679764968361987	0.114379748930561	-4.95561840716192	-3.74288722635955	6.62992072364138	-2.38364722366456	0.020636215080378	0.0354404882249406	-4.03584126303594	2.0727954834009	6.62992072364138	1.40826145681393	0.16470511051343	0.207331794658174	-5.84325522487104	-2.8507699734276	6.62992072364138	-1.02269409594981	0.310948651507925	0.443310752464756	-5.69360083279678
323	TUT4	-6.07757341028867	6.38425589109607	-14.257280227424	4.43186030668993e-20	1.25733975553306e-18	35.23831549038	4.24233877560485	6.38425589109607	11.741926377054	1.38836970815584e-16	6.22931518835562e-15	27.5020715541101	0.253655305643961	6.38425589109607	0.60630505344277	0.546817124545218	0.63905133832393	-6.67059320626357	2.65544163568634	6.38425589109607	5.85703834215322	2.7693325418594e-07	2.78809616089435e-06	6.56480782374029	-0.0917450702723661	6.38425589109607	-0.212860542708762	0.83222605441222	0.866423629171876	-6.79260506969041	2.68323032293836	6.38425589109607	6.26225857357244	6.13869409095478e-08	2.60077368204553e-07	7.99940836396068	-3.66534755931247	6.38425589109607	-4.58928564292442	2.63703572195868e-05	0.00018308254143251	2.43967129181341
324	SKIL	8.98045315392053	6.54594709508475	14.2143113179444	5.05094392050425e-20	1.41718633141421e-18	35.2133427084216	-2.36792230721853	6.54594709508475	-3.87901556451622	0.000283554535326186	0.000656961542833759	-0.252010959198711	-4.12570057947859	6.54594709508475	-5.70230408434272	4.90058223883905e-07	3.21808059977922e-06	5.99534927661212	-1.65508392538454	6.54594709508475	-2.05399049906601	0.0447623046121556	0.080650112024147	-4.65470161317278	-1.82171382287316	6.54594709508475	-2.52439909026297	0.0145180053107317	0.025927736996283	-3.76295481464521	1.59700626841917	6.54594709508475	2.25781886782099	0.0279636914568958	0.0417120968788055	-4.37068550094796	-0.607038787384884	6.54594709508475	-0.514600002011104	0.608903066935568	0.71878508770732	-6.19070265973567
325	ZBTB3	13.8801011028425	2.43706207585138	15.386845503174	1.54589757439205e-21	6.24800269650118e-20	35.1674080309727	-1.71632740911827	2.43706207585138	-1.92652048724847	0.0592349071928185	0.0854301231604157	-4.36475289212908	-2.79124901254369	2.43706207585138	-2.68252521740463	0.00964062350069218	0.0220799978310209	-2.76050588190106	-2.09011826837077	2.43706207585138	-1.65339362296551	0.103972199449511	0.162816244064156	-4.55713217707335	-2.14676958229275	2.43706207585138	-1.85905462425497	0.0683951825490201	0.102111541228638	-4.29537186840225	-1.1763355753419	2.43706207585138	-1.02048753607255	0.311983988012753	0.365909364107541	-5.38956695868157	-3.95930125517514	2.43706207585138	-1.71178507273432	0.0925941549745194	0.17525951838236	-4.20399272935351
326	KRT10	-7.51738246325381	7.37453679256734	-14.1736783544786	5.71694515699647e-20	1.57796982178886e-18	35.1284648315197	2.61312461334578	7.37453679256734	5.89114572109639	2.44102735367058e-07	1.01311587600387e-06	6.43649375134961	2.07773708254377	7.37453679256734	4.11505911556372	0.000131237125377721	0.000501933954927558	0.416738771813478	2.52671339989207	7.37453679256734	4.63051710414122	2.28633230925775e-05	0.00011844503850351	2.16404384378229	1.15867900223525	7.37453679256734	2.27377371191373	0.0269218290638631	0.0448324329286982	-4.51558174479624	2.26924927770115	7.37453679256734	4.30232677656087	7.02311860246839e-05	0.000170391765045595	1.05373260292637	-3.12812091246423	7.37453679256734	-3.40332759544625	0.00125120429466404	0.00516559211234423	-1.23675001225547
327	NECAP2	-6.91751819470485	5.0465048019113	-14.3696236483503	3.15201536202573e-20	9.27840360180117e-19	35.1236569967169	-1.75746950125156	5.0465048019113	-4.43413863346613	4.49211422522553e-05	0.000119958530109916	1.64972399136507	2.00579562361548	5.0465048019113	4.4851559156096	3.7732493643734e-05	0.000164514318391024	1.89006748999521	-0.682440458267037	5.0465048019113	-1.28284813155321	0.204947756500347	0.28590506779291	-5.69391720664972	0.440384622062939	5.0465048019113	0.943918585783904	0.349356778354132	0.422037574135552	-6.17933029678147	-2.01065539211727	5.0465048019113	-3.76142371055948	0.000412916572445523	0.000874699519625135	-0.250522481768956	8.92190330066229	5.0465048019113	13.1382967283186	1.44004783588294e-18	5.3528785432364e-17	30.4790582561907
328	EPHX3	18.8754309963162	2.16641354524381	15.4992507759625	1.11639887107529e-21	4.79768881936788e-20	35.0410648993912	0.0878042764226359	2.16641354524381	0.0721621743788192	0.942735730107605	0.954544528397053	-6.04480383740343	-6.61874233300341	2.16641354524381	-4.08931874662296	0.000142879933325448	0.000541784110543443	0.874071645937359	-7.58101044703426	2.16641354524381	-4.18501377158667	0.000104046511771832	0.000439350631175835	1.0701719148533	5.83345789018465	2.16641354524381	4.25216972458253	8.31290590926265e-05	0.000245767624632337	1.39671600340742	-6.24478568628193	2.16641354524381	-3.45959614727831	0.00105515153454607	0.00207746344081805	-0.849717385238193	-4.35215469660388	2.16641354524381	-1.36637945095713	0.177403744344489	0.290398125385506	-4.56373332831152
329	SLC7A3	17.4893220154758	2.98720444430729	15.0573413706985	4.04901612260253e-21	1.47282961459667e-19	35.008831609097	3.78714714558368	2.98720444430729	3.29990549219418	0.00170481927097619	0.00338669480688365	-1.35422833397039	-0.564917942033376	2.98720444430729	-0.43042716831056	0.66857403412186	0.747303175760661	-5.97629327221614	-1.10243750103916	2.98720444430729	-0.748032329172594	0.457640762905423	0.54765258726257	-5.6898216703085	-0.266516836895335	2.98720444430729	-0.187062619448885	0.852302781996276	0.882992964564345	-5.96166371467819	-7.61528121819499	2.98720444430729	-4.61003957436317	2.45439955921707e-05	6.48794692723226e-05	2.42757900916279	-11.7273156628966	2.98720444430729	-3.28234300632113	0.00179585489228841	0.00696791698207901	-1.76210234233147
330	SAMHD1	13.9657214792641	3.20512836374513	14.8028040551323	8.59568052351364e-21	2.87039364367169e-19	35.0068042672211	0.158572674044449	3.20512836374513	0.171083542090233	0.864788587620674	0.891846067731528	-6.26694408330957	-6.36238587987163	3.20512836374513	-5.41077906101075	1.42365144029223e-06	8.40573328659501e-06	5.10098501380446	-11.8487191013493	3.20512836374513	-6.56151396031968	2.00167743648081e-08	2.88768904965397e-07	8.06996438409835	3.41886133945997	3.20512836374513	3.26797746373173	0.001873712346357	0.00408875721628485	-1.43496120772709	-0.960253502987973	3.20512836374513	-0.804232090303133	0.424740128798178	0.48018406169491	-5.74497325323263	1.62820299144041	3.20512836374513	0.745803747115228	0.458975067444756	0.586605729944139	-5.27425244895704
331	B3GAT3	-6.56767839822832	5.40865895799845	-14.2743731508033	4.20750219947959e-20	1.20037562749859e-18	34.9781096100333	1.73231489599383	5.40865895799845	4.45810979151259	4.13911371471348e-05	0.000111290583908017	1.70730547093832	0.357571582984921	5.40865895799845	0.79729915762005	0.428720424508451	0.526213247001516	-6.36182033824033	2.24397143779649	5.40865895799845	4.68673584459937	1.88067112827273e-05	0.000101026558235537	2.5939224248335	3.03244996227001	5.40865895799845	6.89829078515645	5.64447180417691e-09	3.94841657455645e-08	10.3827927520559	2.18773663311509	5.40865895799845	4.68375865543533	1.90026507710438e-05	5.14328987783899e-05	2.5677714815222	-2.98636611393202	5.40865895799845	-3.1047630906198	0.00301284892543148	0.0108043961994634	-1.75148953528585
332	ERGIC3	-4.13077392174668	6.99912219707275	-14.1255122444015	6.62284086433269e-20	1.80641262079705e-18	34.9706812617175	1.20329498465993	6.99912219707275	4.76416003489052	1.43516395169349e-05	4.2368535791299e-05	2.50007460159009	0.783325383474905	6.99912219707275	2.72924049749498	0.008518274200636	0.0198260106794967	-3.45504612753777	2.68113117050831	6.99912219707275	8.66533605897348	7.53247849923731e-12	3.00856052998949e-10	16.7944644108729	1.10958101872509	6.99912219707275	3.81973035700096	0.00034294768697274	0.000884956217840728	-0.436642685258644	0.417928996642797	6.99912219707275	1.37025156035944	0.176199154402353	0.220465403880586	-5.98753653275044	-2.06448763226436	6.99912219707275	-3.84478017847879	0.000316522013952887	0.00159435050054904	0.081512832223102
333	CHEK2	11.1703047965378	4.49918235862171	14.3382768731764	3.46589171294033e-20	1.01437089357176e-18	34.9486097747241	2.60355275666612	4.49918235862171	3.51010500125989	0.000904357662545015	0.00189290645150452	-1.05598628866579	-2.13455636503461	4.49918235862171	-2.44740392346589	0.0176242057314077	0.0372411899116987	-3.63716072491961	1.11621952554959	4.49918235862171	1.12136013921367	0.267027227447875	0.354863297436926	-5.71434381987382	-2.29536662994365	4.49918235862171	-2.47335251478106	0.0165161378244218	0.0290329416192157	-3.52095416546075	-9.88859013211756	4.49918235862171	-9.02822195602232	1.97719794226075e-12	1.98793297551094e-11	17.6677198320184	-0.571563951657716	4.49918235862171	-0.326707132459352	0.745134699547149	0.825002382311959	-5.74752225858656
334	FAM107B	-9.13423969829258	5.69245579143214	-14.2235399157538	4.91097650530477e-20	1.38172087587097e-18	34.9049856312368	-2.35894116964466	5.69245579143214	-4.48983421269545	3.71324710332311e-05	0.000101067401783394	1.7602229883685	1.61789351222127	5.69245579143214	2.79316571292774	0.0071764635613103	0.0170338572295375	-3.1258690641115	-4.69575056655547	5.69245579143214	-6.544056327392	2.13719377703154e-08	3.05720767121717e-07	9.12045474091014	2.43229367415308	5.69245579143214	4.09325422331922	0.00014103727704555	0.000398685724870643	0.574495587930945	0.24028475587787	5.69245579143214	0.372290087065352	0.71111359912525	0.750382512131234	-6.614048111903	11.8984594922405	5.69245579143214	13.9448786630058	1.15274967890933e-19	4.8515518511122e-18	33.3323688306496
335	NR2F2	-26.8247222452171	6.02267383939219	-14.3605270292521	3.24001154689962e-20	9.50994743664917e-19	34.8989956717455	8.098205675876	6.02267383939219	6.80440381121126	8.03589255746439e-09	4.67956350473269e-08	9.91781775004869	-4.09270069369848	6.02267383939219	-2.78927140941345	0.00725227694962853	0.017189769777046	-3.1148804895218	15.4325760375601	6.02267383939219	11.6711437459686	1.76186609136003e-16	2.49230640840304e-14	27.2352537509114	2.98358561231135	6.02267383939219	2.25300906045839	0.0282847050390559	0.0468270027345227	-4.41483527694319	4.97900002084782	6.02267383939219	3.49869167545255	0.000936522475715918	0.00186371266415917	-1.24883353081985	-0.575944407679685	6.02267383939219	-0.216249934694342	0.829596361795092	0.885008459488023	-6.1630275452768
336	AKAP1	11.2207695143341	4.43411915594327	14.3111017816327	3.76355340496243e-20	1.08897134743018e-18	34.8726687580835	-1.55268046682936	4.43411915594327	-2.06523655499855	0.0436465808505566	0.0650198078050196	-4.54246626383332	-4.58156315798321	4.43411915594327	-5.1236875029863	4.01376764066921e-06	2.16068834144904e-05	4.14735289713377	-7.36925948144346	4.43411915594327	-6.24647035296955	6.51154233655854e-08	7.87649153181101e-07	7.99046971449155	5.69978805443224	4.43411915594327	6.66687208482432	1.34765023954819e-08	8.67624379886116e-08	9.5711591965016	-3.2878986090155	4.43411915594327	-3.39590989933377	0.00127949164020594	0.00248517143256826	-1.20496233862206	-0.129155853494776	4.43411915594327	-0.0755399432776053	0.94006037387167	0.961568092445698	-5.82116238471054
337	ENC1	-20.8844370605589	5.16795990429009	-14.4152828246575	2.74557369895108e-20	8.20048918587002e-19	34.8702118061757	-5.63869405275548	5.16795990429009	-5.28131237184535	2.27621065158017e-06	7.80054020401886e-06	4.53219553998524	-0.508807460628531	5.16795990429009	-0.431085507569765	0.668098206881319	0.747018336912622	-6.58316795232276	7.47580389138213	5.16795990429009	5.85735112883556	2.76613131261311e-07	2.78809616089435e-06	6.64853601039386	0.838355778782513	5.16795990429009	0.707827144034573	0.482054068690773	0.55277197586304	-6.41267761616932	14.9699168648087	5.16795990429009	13.4846115041679	4.82078257060837e-19	1.48337373056333e-17	32.816262899566	3.74786203896964	5.16795990429009	1.72799643937437	0.089623974151647	0.170853105563954	-4.68260872733531
338	DLGAP4	-7.47628681991131	5.8118077530052	-14.1633708769696	5.89961557628931e-20	1.62398877417585e-18	34.832990623699	-0.0267238806631314	5.8118077530052	-0.0613269390943651	0.951322088086634	0.961517859200393	-6.91671349442158	-2.04606446245414	5.8118077530052	-3.89706568289264	0.000267529732840236	0.000950066362962971	-0.0294474832765426	3.14361205169983	5.8118077530052	5.76635649229953	3.87075041528639e-07	3.69134765727452e-06	6.27349357090448	-0.492758773309354	5.8118077530052	-0.959245043944825	0.341650978381603	0.414153203382126	-6.30324804418555	3.56256348502524	5.8118077530052	6.90187874377325	5.56876712037448e-09	2.86888685488184e-08	10.3701211006254	3.33565839961286	5.8118077530052	3.97577399251911	0.000207286952152383	0.00110623129912625	0.509532824924555
339	CD3EAP	11.8725819631554	4.34274225498955	14.3195185871124	3.66868900502655e-20	1.06758850046273e-18	34.8206147410902	-0.295485518904279	4.34274225498955	-0.370859324709421	0.712172938755944	0.759447322922132	-6.49649398131435	-1.88384356403916	4.34274225498955	-1.95942155029194	0.0551610898444589	0.0976221894119573	-4.56123231672729	-2.51359471770758	4.34274225498955	-2.15939439247014	0.035215660064171	0.0659443827456484	-4.02576036493741	-0.27628592380559	4.34274225498955	-0.284539519412292	0.777070057525597	0.821407093757337	-6.33762797849751	-6.65626781367109	4.34274225498955	-6.21213841415174	7.40186429150707e-08	3.08461488580194e-07	7.92772148920495	-0.2471044250277	4.34274225498955	-0.137987785591828	0.890756147207327	0.929742221014159	-5.79904599272871
340	AKAP9	-8.80480796138461	6.88316401924735	-14.08879713995	7.41007252769635e-20	1.97569603912532e-18	34.8200185863534	3.962134953948	6.88316401924735	7.62760368039791	3.62683754623477e-10	2.82626935029848e-09	12.9002208321422	-0.329386615140883	6.88316401924735	-0.534033904952021	0.595479145626842	0.682222170777209	-6.77891715475449	2.17546058819828	6.88316401924735	3.40888577400834	0.00123039808162442	0.00373450416756188	-1.58162646707389	0.981602628333508	6.88316401924735	1.64432496542288	0.105837729347135	0.149589264082822	-5.61330263229973	5.4651104542796	6.88316401924735	9.11318396293203	1.44796624058963e-12	1.49569332255632e-11	18.4039761810917	-3.4501140482339	6.88316401924735	-2.95441459791005	0.00461004003066735	0.0153091808648017	-2.320299962829
341	HYAL2	-6.67532659819911	6.44271182201425	-14.1048588187348	7.05463523767498e-20	1.90083227237354e-18	34.8179174999737	1.25787973270437	6.44271182201425	3.19185784097677	0.00234223041143536	0.00453701345387394	-2.30828299282769	-0.782423508026718	6.44271182201425	-1.71800240740209	0.0914455756922474	0.149762532308336	-5.44929436197042	1.18380822940501	6.44271182201425	2.38110473413242	0.0207653682070355	0.0418553879257188	-4.09682043933893	-0.377324160333052	6.44271182201425	-0.807160810322143	0.4230653965864	0.495677103903426	-6.53562148995645	-1.45861202557005	6.44271182201425	-2.9379991140316	0.00482565338027772	0.00839584552069159	-2.78364304096667	6.85199833001955	6.44271182201425	9.5712626185784	2.73170792832015e-13	5.88212373148853e-12	19.8466291172487
342	ERCC1	-5.2893490486693	6.44740074715773	-14.0972806183953	7.22013220166448e-20	1.93010620666543e-18	34.8090618835657	3.14103352228505	6.44740074715773	9.90457136511429	8.22660871800668e-14	1.59900782047515e-12	21.2132431113755	0.409277331095314	6.44740074715773	1.11518640276133	0.269640033699136	0.365125287371504	-6.27459435822177	4.19836876185763	6.44740074715773	10.8176527558143	3.27432861454723e-15	3.4738580144962e-13	24.3744739249911	-4.18921895635492	6.44740074715773	-10.7050191169069	4.84761377951505e-15	1.36767164388811e-13	23.9867429094663	1.91248127495272	6.44740074715773	4.97343278721192	6.86035811688114e-06	2.00841470021369e-05	3.40524363871777	-0.182592885166493	6.44740074715773	-0.270912536652512	0.787476722733777	0.855058680281826	-6.26216642966801
343	AGPAT4	-8.51746696014207	5.0981874544378	-14.2750630055442	4.19869292916576e-20	1.20037562749859e-18	34.7802433055835	2.72789939728858	5.0981874544378	5.56238952253694	8.18868590141311e-07	3.04942471319534e-06	5.5275365140847	4.00227839647336	5.0981874544378	7.40951148054643	8.23668506886575e-10	8.82130782611963e-09	12.2543642399563	2.5448962825466	5.0981874544378	4.24213625258829	8.59721076158389e-05	0.000372131711035835	1.17989851750565	-0.0906613400446066	5.0981874544378	-0.15429176155102	0.877946853513872	0.904317223203761	-6.56469679784142	2.73014248934787	5.0981874544378	4.62637959428415	2.3193576652555e-05	6.15814854552326e-05	2.41192089427661	-3.39708826546974	5.0981874544378	-2.68780111008542	0.00950740422609439	0.0279057383408563	-2.69390702940806
344	TSR1	5.37724226094302	5.76307448458198	14.1080926737328	6.98518770349436e-20	1.88711238090424e-18	34.7509647002046	0.938777033476985	5.76307448458198	2.66132924224519	0.0101932422816934	0.0174778068415904	-3.50623254460016	-1.00750513543039	5.76307448458198	-2.49328198032331	0.0157082169707912	0.0336180268643641	-3.78563349083759	0.480444166326727	5.76307448458198	1.05217113993507	0.297341222716557	0.38791089450085	-6.06969035884171	-2.61903009102614	5.76307448458198	-5.96808006721515	1.83550835427813e-07	9.28234984524465e-07	7.02394746093721	-1.08896160004947	5.76307448458198	-2.52679278993073	0.0144299210653398	0.0228106077992374	-3.6525540786918	-2.08096663424073	5.76307448458198	-2.63069137672777	0.0110433319950893	0.0317460729240713	-2.94708465184
345	BCORL1	-10.9836509097058	3.33177232474807	-14.9042418194628	6.36183049715794e-21	2.19644893605267e-19	34.7252056185072	-1.15945990471557	3.33177232474807	-2.01758628736132	0.0485450852070449	0.0715427134761615	-4.47454293249516	-1.28352674075448	3.33177232474807	-1.94323132347552	0.0571347724297978	0.100568036639793	-4.50462543187867	6.47084966308843	3.33177232474807	8.8780516338097	3.4344302715754e-12	1.52749660768539e-10	17.0956273868017	2.05719075289012	3.33177232474807	2.98528651597127	0.0042286283237735	0.0085504426201376	-2.21097724257974	-0.468545452311786	3.33177232474807	-0.614459616320302	0.541455977862078	0.595093248572922	-5.97900839590099	5.36714259150911	3.33177232474807	4.56022893132176	2.91520811401109e-05	0.000199271104974517	2.20064589723245
346	UCKL1	7.66769655793468	4.35883799897349	14.3037081575498	3.84893541791336e-20	1.10738438506914e-18	34.6957227031055	-2.08873557520422	4.35883799897349	-4.13254407492057	0.000123857898329512	0.000306559585537321	0.839768874888657	-1.63591203918139	4.35883799897349	-2.79426529499465	0.00715518985298925	0.0170009264728593	-2.81436488023037	-2.77308995452935	4.35883799897349	-3.93369296016636	0.000237650006458665	0.000899132732459697	0.403521726033667	-1.00755591166437	4.35883799897349	-1.64318565622663	0.106074015909512	0.149826959833848	-5.07151083544198	3.5107441031908	4.35883799897349	5.91938141435677	2.19868240044309e-07	8.40915518156697e-07	6.91060432018556	-3.67314718054615	4.35883799897349	-2.82202307973805	0.00663705191285142	0.0206533375289923	-2.35349775940399
347	UTF1	22.5121461610244	5.61947718378006	14.101651484762	7.12420441703497e-20	1.90947426282898e-18	34.6701052469778	-0.515996331950783	5.61947718378006	-0.320675178679173	0.749676939682451	0.791403361387413	-6.68025776591143	-7.57658068111636	5.61947718378006	-3.78832292898337	0.000379084856691207	0.00129476165841715	-0.195385620520056	-0.893452165469172	5.61947718378006	-0.417079897854376	0.678250306634759	0.74605808875759	-6.37851848940772	-12.0385846045881	5.61947718378006	-5.17396979969926	3.35116669221902e-06	1.31579154819779e-05	4.33650291036995	4.72196839299983	5.61947718378006	2.6581822990128	0.0102777159714979	0.0167191402602948	-3.32567786643596	-6.20950077089977	5.61947718378006	-1.48279409560288	0.143860880923319	0.24727792613444	-4.82607503521422
348	OST4	-4.92040469176349	8.63648489332716	-13.9882331285848	1.00879672190185e-19	2.62107005422713e-18	34.6483841568547	-0.356414443637705	8.63648489332716	-1.15922430191157	0.251393947435621	0.310174079519545	-6.65077059566969	2.05170901645712	8.63648489332716	5.92055729389442	2.1891250877485e-07	1.54192524334153e-06	6.48045683062348	0.734097324648308	8.63648489332716	1.92777556137281	0.0590749204705487	0.101737921033571	-5.30636437092293	0.374406285129441	8.63648489332716	1.06105645404152	0.293320941692274	0.364503878859908	-6.62828460839396	-0.21134578985798	8.63648489332716	-0.564632296859357	0.57462926771951	0.625946426922269	-6.98329122232246	2.32795229902432	8.63648489332716	4.38625942442022	5.2871114411724e-05	0.000334467267256776	1.47736053479501
349	ARGLU1	-6.21355253422038	7.85325526166165	-13.9841565715658	1.02151909147624e-19	2.64737199661208e-18	34.6099034418474	3.82434592146097	7.85325526166165	10.0921025153278	4.20985165075363e-14	8.8224977495732e-13	21.8080583315516	-1.48381864867008	7.85325526166165	-3.29613687992342	0.00172397866650346	0.0048991971870362	-2.05678347808206	3.05307072644907	7.85325526166165	6.60446574697482	1.70361980903408e-08	2.51834074818754e-07	9.13149607027862	-1.86679827458365	7.85325526166165	-4.1184148419646	0.000129788664769847	0.000369142013594218	0.41283720247502	1.60523871688526	7.85325526166165	3.49022036377801	0.000961097019671299	0.00190851494352743	-1.48820543972618	1.08151409267881	7.85325526166165	1.51710990931226	0.134990243292539	0.2350214748606	-5.48182098882344
350	POLR1B	8.94651962449908	3.42922697457873	14.4988221488945	2.13416455529013e-20	6.54712831193674e-19	34.4525769107747	-1.16511132883007	3.42922697457873	-1.97736713140999	0.0530419391990993	0.0773971562668806	-4.48895728286868	-2.46614886252086	3.42922697457873	-3.60105888080022	0.000683100231235727	0.00216943431716117	-0.550844512677084	-0.0898528859644934	3.42922697457873	-0.112283711930016	0.911008984527746	0.930779084309361	-6.06625998249431	-2.23309264632956	3.42922697457873	-2.93453067123372	0.00487239412855401	0.00971521812829339	-2.25036261369426	-4.05770982533616	3.42922697457873	-5.1115298911714	4.19241936538436e-06	1.27728959726113e-05	4.12254997683194	1.06539592448206	3.42922697457873	0.7858278474561	0.435355008230267	0.564924290842817	-5.32341811668846
351	MFSD3	6.75627124826815	4.76367218779626	14.1252596014779	6.62795757585416e-20	1.80641262079705e-18	34.4032857184498	2.9743464521119	4.76367218779626	6.64808906170215	1.44618020992549e-08	7.98771444581949e-08	9.48380369176935	-2.06252546632157	4.76367218779626	-3.97706020323572	0.00020642053304454	0.00075381610937922	0.389785550700227	-2.04433284719866	4.76367218779626	-3.50675692007331	0.000913682493183545	0.00288912020896442	-0.917018929161916	3.3968200241886	4.76367218779626	6.55555675098447	2.04692973535316e-08	1.26198422243172e-07	9.17093587195232	-4.15674000688758	4.76367218779626	-7.13245489042852	2.33752753900234e-09	1.29190416509163e-08	11.2245546998961	-4.86383940416086	4.76367218779626	-3.9066934308212	0.000259342589334414	0.00135179338401791	0.303762678789327
352	CAAP1	6.99505388801305	4.86947513176315	14.0842475589643	7.51401313079712e-20	1.99817816546132e-18	34.3559370688264	-0.662542478328418	4.86947513176315	-1.41512661867389	0.16269237217903	0.211031814906193	-5.67586531621705	-1.17133736675114	4.86947513176315	-2.15465184589469	0.0356034204325645	0.0677669290049839	-4.31056937937217	-2.90852262481846	4.86947513176315	-4.63066813950537	2.28513549034934e-05	0.00011844503850351	2.52430432145013	1.26111854376775	4.86947513176315	2.3017676898994	0.0251767832048034	0.0422447342571537	-3.99574342932352	-2.21518264536288	4.86947513176315	-3.71657409713903	0.000475857602152508	0.000997450026327082	-0.3438780576542	-1.29858731651992	4.86947513176315	-1.15171345661495	0.254441696428651	0.380821260562206	-5.22324544785891
353	PHF6	-6.99415266155972	6.30684808930397	-13.9620868803626	1.09327307886468e-19	2.80243404981099e-18	34.3508605035776	4.33072948275154	6.30684808930397	10.215474489781	2.71512312832088e-14	6.01163675259744e-13	22.3145614685106	-1.67376723222861	6.30684808930397	-3.36386107709636	0.00140882752511045	0.00409383975556345	-1.65687161271143	6.45726465520126	6.30684808930397	12.8394294791203	3.74875030894603e-18	7.79204528502353e-16	30.9372212773896	-4.21700611142677	6.30684808930397	-7.97290628081816	9.92855442765077e-11	1.01528440608055e-09	14.2997882333203	4.3526013570698	6.30684808930397	8.73749781171958	5.76834852348277e-12	5.37025865737404e-11	17.0701977383469	-2.2556694898075	6.30684808930397	-2.34489958493853	0.0226846742437478	0.0567534775663404	-3.63271951869747
354	ATXN7L1	10.8071367087321	3.1907994890677	14.5604660820458	1.77311885090727e-20	5.60845201754366e-19	34.3434500525063	-1.03368328803659	3.1907994890677	-1.43935355990387	0.155741599157389	0.20307619861964	-5.28933754398528	-4.05049571639661	3.1907994890677	-4.75001777026109	1.50798702541597e-05	7.17367952072008e-05	2.96157993620098	-2.34190617971028	3.1907994890677	-2.26265479377584	0.0276441921087353	0.0535175620308192	-3.63415798666029	2.41439816222446	3.1907994890677	2.92170587960659	0.00504889965229596	0.0100416018275013	-2.31027266044012	-2.22612015500432	3.1907994890677	-2.45063463148734	0.0174826894606759	0.0271807650979978	-3.33476506310218	-3.56932953180872	3.1907994890677	-1.86383233948917	0.0677092343704845	0.1371556388352	-4.04127365088172
355	UTP4	7.20833523764283	4.26372185902605	14.1954461400073	5.34977912239331e-20	1.49440093285708e-18	34.3415391091731	-0.524924741504242	4.26372185902605	-1.09968559715935	0.276279447899957	0.33719666589108	-5.94715880601852	-0.528252244831743	4.26372185902605	-0.95412433170473	0.344213034430508	0.441093326078853	-5.96710176545647	-0.722547702425913	4.26372185902605	-1.16870211380182	0.247585510372395	0.333552701473921	-5.64134804914833	-2.04894067922181	4.26372185902605	-3.43693896785102	0.00113029997330048	0.00258638203131094	-1.07231660507015	-1.78242991029726	4.26372185902605	-2.89745417350584	0.0053990086464823	0.00929337553902691	-2.47307610725273	-1.60123995936186	4.26372185902605	-1.3341356248725	0.187680462765584	0.303224224820349	-4.89729381686922
356	TCEA1	7.38089397410775	6.7297763306699	13.9141002708959	1.26743082495775e-19	3.19524330499869e-18	34.3399506582767	1.13956461648724	6.7297763306699	2.27712393200087	0.0267074825081542	0.0417330023543343	-4.50234129583159	-3.13203228563788	6.7297763306699	-5.2690861874976	2.37899047479327e-06	1.34835937594711e-05	4.43012068353827	0.589899361670728	6.7297763306699	0.9238561268675	0.359613738535725	0.452180978640291	-6.35053063617478	-3.09541531479398	6.7297763306699	-5.01767586565306	5.86161103847934e-06	2.19325894294313e-05	3.58991041947784	0.463620831327222	6.7297763306699	0.775642623720829	0.441296477519677	0.49713578404357	-6.54222584836614	-3.34653118316107	6.7297763306699	-3.22357992783918	0.00213495324541349	0.00807145464162451	-1.63160367468667
357	ANKRD12	-5.32835963829048	6.46233897071183	-13.9349250173352	1.18863860079088e-19	3.0115134699142e-18	34.3200585747937	1.85296889506368	6.46233897071183	5.71690312879312	4.64425853097723e-07	1.8151102508827e-06	5.90418117911712	-2.57655934813698	6.46233897071183	-6.63910000102615	1.49584422296844e-08	1.30661864587766e-07	9.36817541703154	2.02179310538391	6.46233897071183	5.0438802971635	5.3389932999018e-06	3.47683163423912e-05	3.6699883678565	-0.0783330460913607	6.46233897071183	-0.206540825447442	0.837134402567909	0.870377081477557	-6.84160475958964	3.62769178241202	6.46233897071183	9.53638443923687	3.09932729953087e-13	3.64510953183856e-12	19.9299424427862	0.480798249659195	6.46233897071183	0.722632221590968	0.472980441360098	0.598720581065449	-6.06585423039997
358	CYTH2	-5.46240295941701	5.79003079031566	-13.9826784163144	1.02617227002177e-19	2.65268136298775e-18	34.312404688801	0.0354369493859927	5.79003079031566	0.108034630463147	0.914363035032978	0.932791573637965	-6.9003121184648	-0.0122506154463338	5.79003079031566	-0.0324577030141193	0.974225044979288	0.982506962625524	-6.78290239880366	0.590696596208968	5.79003079031566	1.38065138305769	0.172994850671498	0.248687728170672	-5.71952903488306	-1.49927739784717	5.79003079031566	-3.81761347018678	0.00034527551733688	0.000890737371853122	-0.257598876791969	3.81378446924754	5.79003079031566	9.91968974908561	7.79295487012269e-14	1.0201959556838e-12	21.2662560903025	2.53401295786801	5.79003079031566	3.89542907668704	0.00026894597732463	0.00139117053278383	0.288136652838014
359	ZBTB16	-24.7625327186896	3.63706467727308	-14.9012203604194	6.4189979973042e-21	2.20869914197781e-19	34.2717579701916	15.8464159754046	3.63706467727308	13.5503684364071	3.92308695369848e-19	4.29641297026011e-17	32.3866523969662	-11.2387714778217	3.63706467727308	-6.59356744928171	1.77477260037216e-08	1.53057230607878e-07	9.13400583412957	8.91683688216599	3.63706467727308	6.58989266120912	1.79942639369978e-08	2.62943440743648e-07	9.27014700426135	5.27665224102347	3.63706467727308	3.86957761661063	0.000292297362234005	0.000767030642566409	0.18128509415077	12.115890114599	3.63706467727308	9.70968746331385	1.65710797168775e-13	2.04329838881837e-12	20.261994472287	-6.15449101668174	3.63706467727308	-1.74608640424205	0.0864031115896199	0.16610337703667	-4.22191989796384
360	TMEM158	13.431455887138	4.24930305965353	14.1193878489966	6.74801184188828e-20	1.83276001625686e-18	34.2259821478778	-1.1515162498017	4.24930305965353	-1.23685910897239	0.221416826288033	0.277520351432884	-5.78396901440358	0.177723191257669	4.24930305965353	0.16629731857609	0.868535382431912	0.907099350909457	-6.40348587854979	-11.8671430175016	4.24930305965353	-7.46125196364016	6.77952309385035e-10	1.53443206024146e-08	11.9704303041806	-13.1774753513563	4.24930305965353	-8.78882751241817	4.77231552052203e-12	6.55951870128433e-11	16.5071032328702	14.0224073382502	4.24930305965353	14.5102810282633	2.06181798166625e-20	7.89459253506421e-19	35.2683611501487	-1.43545179798626	4.24930305965353	-0.63037552638301	0.531070453599359	0.650505420313827	-5.52536864820478
361	MT1X	20.3004887522455	6.26785551769547	13.8945486841676	1.34622034191195e-19	3.36885852146761e-18	34.2094373904851	-2.85806579927124	6.26785551769547	-1.93969821694806	0.0575734126405993	0.0832634801116539	-5.01888814790541	-3.22531146251146	6.26785551769547	-1.9304479991087	0.0587354871869326	0.102875483576768	-4.93264547773966	-1.60803205580241	6.26785551769547	-0.812884063365099	0.419804154432176	0.511876608750355	-6.24617984832592	-9.68609565490657	6.26785551769547	-4.84597482477906	1.0767631564979e-05	3.80396557368405e-05	3.1579114534314	3.14906774130035	6.26785551769547	1.92697196556699	0.0591773138812437	0.0829830623756505	-4.95966966068704	-6.07205152105414	6.26785551769547	-1.63789287470977	0.107177352636896	0.196791299189975	-4.72492250304071
362	PLPP1	12.441702229906	4.48610692550871	14.1025486169225	7.10467528696277e-20	1.90926432183947e-18	34.2017525012957	-3.73343868906344	4.48610692550871	-4.31710217644977	6.68178534194175e-05	0.00017351857141172	1.432005412911	-3.11721399674245	4.48610692550871	-3.03245530037719	0.00370226623701722	0.00954380704227293	-2.19081669643685	-1.79476867788053	4.48610692550871	-1.50290330184001	0.138608529816195	0.206785978640391	-5.15831981539647	2.22642529601642	4.48610692550871	2.26572782899817	0.0274428479961477	0.0456186399283115	-3.99257859629638	-3.87310626958531	4.48610692550871	-3.47012028744096	0.00102188361479728	0.00201781400091319	-0.966073198922015	-2.1495998926507	4.48610692550871	-0.991996285021384	0.325561911114819	0.458845778724275	-5.2489191739664
363	CDCA7L	10.2889963318238	5.21757024641911	13.9937366205765	9.91875358053804e-20	2.58369578562097e-18	34.1877885193557	5.79764396418932	5.21757024641911	8.27612231321119	3.19773629117282e-11	3.20876296803894e-10	15.4065602954324	-10.6025145007279	5.21757024641911	-12.1484531752226	3.57798346702682e-17	1.31085473423267e-15	28.3108626026283	3.74382816374158	5.21757024641911	4.42580663400226	4.62154938286876e-05	0.000220304800369099	1.79312888908911	-2.82161853485746	5.21757024641911	-3.29374579073365	0.00173624010497232	0.00380947985117256	-1.583814272996	3.13950355786777	5.21757024641911	3.85077684264762	0.000310492729137078	0.000670703806205969	-0.0267210267130888	-9.54583898203714	5.21757024641911	-4.48500689531624	3.77517610245898e-05	0.000249514397167714	1.8639574045364
364	ZNF148	-6.04084887802517	5.38151427986947	-13.977985569904	1.04108800627455e-19	2.68442565668514e-18	34.1494275071846	1.85037850559212	5.38151427986947	5.07482796959773	4.78056062134118e-06	1.53402677783113e-05	3.77662553391085	0.714914251096512	5.38151427986947	1.71068914812264	0.092797842941506	0.151489987235012	-5.26887355246322	0.7855365761989	5.38151427986947	1.63523838228629	0.107734217405207	0.167676192584357	-5.25679885358935	0.279343112428266	5.38151427986947	0.643991635426344	0.522268728055387	0.592152621089182	-6.44441292577994	0.406721527894917	5.38151427986947	0.893668957517647	0.375409320743809	0.430821851467684	-6.21776975263185	2.00395490481444	5.38151427986947	2.68653676893458	0.00953917499051657	0.0279520945628173	-2.85143762296835
365	DDX5	-5.24474119444697	9.12275980440174	-13.8167445544132	1.71219165903575e-19	4.19198847290362e-18	34.1226521262869	1.7614236856342	9.12275980440174	5.35665069205787	1.73287257393272e-06	6.06713893623401e-06	4.29172073634038	-1.00011223932651	9.12275980440174	-2.58446618092189	0.012448849771104	0.0275394298259545	-4.06391821132884	2.14491009299215	9.12275980440174	5.31741518907997	1.99759070192117e-06	1.51492638116658e-05	4.31745998491732	-2.26106537506082	9.12275980440174	-5.77191014253807	3.79228957488353e-07	1.80151442724761e-06	5.92964076936233	4.98254790210079	9.12275980440174	13.0571627006394	1.86502064679819e-18	5.17581342987455e-17	31.7528762565651	-0.382962871892808	9.12275980440174	-0.648055962657491	0.519656472251419	0.640375217166449	-6.62539880376167
366	POU5F1B	21.612337400816	1.6971033150859	15.4820178006893	1.17340870728367e-21	5.00048857057917e-20	34.116730453691	-1.6400493482594	1.6971033150859	-1.16467846839199	0.249197218953792	0.307943906217468	-5.31600291177013	-3.14497801937887	1.6971033150859	-1.86731243082005	0.0672132573698635	0.115285790891219	-4.23953884938292	-5.18705819026051	1.6971033150859	-2.51153667940271	0.0149997155606293	0.0317944022861622	-2.99059263542796	-4.93573731938362	1.6971033150859	-2.45198338649122	0.0174239127648629	0.0304552173520042	-3.11022882862289	-4.41732344701377	1.6971033150859	-2.16132935613072	0.0350585202751045	0.0513549588669552	-3.64604344391654	-2.2871910765198	1.6971033150859	-0.669861045366066	0.505760890949472	0.628959056693574	-5.05635601794388
367	HGSNAT	-10.7648226745589	4.05971328920426	-14.306913303906	3.8116837091775e-20	1.09977333082076e-18	34.1152282166849	-2.66406968263356	4.05971328920426	-4.50688176659824	3.50237264995344e-05	9.594315610483e-05	2.02149365134896	3.49432732351315	4.05971328920426	5.31627958699715	2.00581887463723e-06	1.15484823279707e-05	4.78874439898465	-0.946956148235751	4.05971328920426	-1.14498512106957	0.257194269635663	0.3447195204947	-5.63058966992416	3.93604561162797	4.05971328920426	5.82744357033229	3.08944490060063e-07	1.5026741314526e-06	6.5819421124988	-1.17655184477149	4.05971328920426	-1.50676009093936	0.137618732227301	0.176485367380391	-5.22796271475569	8.12202741505858	4.05971328920426	7.53511578856025	5.13492429859031e-10	7.66850498257218e-09	12.1815255143321
368	CKAP4	-7.71495136214087	6.40950452510111	-13.8714209652283	1.44585836777324e-19	3.60050549529839e-18	34.0931981564502	0.604692578962124	6.40950452510111	1.28733137105971	0.203392541859791	0.257303818015399	-6.15769648554143	5.93790676675332	6.40950452510111	11.6828036850637	1.69398566622922e-16	5.39163875329518e-15	27.2924578662559	2.12724498749352	6.40950452510111	3.74226558846228	0.000438758851722818	0.00151998602203976	-0.543174441353838	2.00034591626463	6.40950452510111	3.74560547206746	0.000434144765629692	0.0010899098935022	-0.577995665480938	-0.573943668823142	6.40950452510111	-0.981106690936322	0.330854333956849	0.385158462835811	-6.30101699853989	-2.38129521850959	6.40950452510111	-2.22422619572261	0.0302747524210243	0.0717686642876489	-3.88282073465665
369	LYRM2	-6.50396771695746	5.81917065778267	-13.9088792669808	1.28800167676287e-19	3.23908569822958e-18	34.0759435204141	4.44723759333769	5.81917065778267	11.3076253832172	6.04916042920456e-16	2.1172061502216e-14	26.0397100693601	0.212072752309288	5.81917065778267	0.458154905715846	0.648653857680644	0.729795204316344	-6.64166407048852	3.10085956152448	5.81917065778267	6.37075617580471	4.09160633103414e-08	5.31543501040596e-07	8.45825287311305	-2.32972681720995	5.81917065778267	-4.8817873137201	9.49026771592941e-06	3.39509577403375e-05	3.18966208885149	4.67416888147359	5.81917065778267	10.1736377150741	3.14991125236975e-14	4.45581195908137e-13	22.1431005003046	-3.60064425447764	5.81917065778267	-3.87588619356315	0.000286425154058444	0.00146697332628561	0.291228814193604
370	AHCYL1	-3.529717260103	6.74183457283319	-13.8338190321821	1.62407070547029e-19	4.01484469301333e-18	34.0560811822633	1.50170326744599	6.74183457283319	6.72993299612844	1.06328938553644e-08	6.03656766537828e-08	9.60310626927442	2.13921828987183	6.74183457283319	8.53142307907321	1.23722924872146e-11	1.84497509490894e-10	16.300932231919	1.02532369613441	6.74183457283319	3.64129233697542	0.000602670320670227	0.00201582831396593	-0.841931267411262	0.00934074541240015	6.74183457283319	0.035903477110725	0.971489864215801	0.978436678054095	-6.87557025361414	0.766656096413358	6.74183457283319	2.84617853635737	0.00621459349800308	0.010566883936087	-3.05083912361847	-1.912524835175	6.74183457283319	-4.10177972372859	0.000137124008855795	0.000771180579898548	0.881708063894491
371	MEX3B	-9.97957661483265	3.44729712573737	-14.5234330009991	1.9818393005292e-20	6.15397355972254e-19	34.0517309124025	2.54751143925828	3.44729712573737	4.78828748866856	1.31879612109919e-05	3.91830177753652e-05	3.00689255899343	-4.04010690164265	3.44729712573737	-5.97555411974489	1.78530957406591e-07	1.27156489593436e-06	7.09213083084197	3.17020076600849	3.44729712573737	4.62382274547093	2.339998884786e-05	0.000120672853881243	2.54718650383018	-10.0360405105374	3.44729712573737	-12.1530154407198	3.52437349022656e-17	1.90934808499774e-15	26.6071938185307	8.32339661226816	3.44729712573737	13.5711554736244	3.67610784051836e-19	1.15203564171321e-17	32.0508229667047	10.0146152094777	3.44729712573737	10.2741307219223	2.20542892382263e-14	5.42567477998394e-13	20.4010266851583
372	USP3	-16.0665988882295	4.48641584455851	-14.1950962983691	5.35548689732778e-20	1.49440093285708e-18	34.0301669174346	3.21355098555665	4.48641584455851	3.93450548501175	0.000237025084784573	0.000555604255127934	0.112161425145705	-0.479192074605046	4.48641584455851	-0.49353029839984	0.623611270406108	0.707528215337664	-6.44047222481498	4.05931902052834	4.48641584455851	3.91039631050222	0.000256258475454822	0.000960615595328437	0.197801261495267	2.5904646823922	4.48641584455851	2.6920440472901	0.00940149365140004	0.0176375415066328	-3.16756273998921	3.41615862517222	4.48641584455851	3.47949384421723	0.000993094692317808	0.00196549111458928	-1.105030561359	3.26629764918517	4.48641584455851	2.01880590376771	0.0484140215432021	0.105341117705904	-4.17562372949326
373	PARVA	-7.59737577629306	4.75401477547142	-14.04833773027	8.38803312034515e-20	2.2132672883605e-18	34.0261659842788	-3.54874455451409	4.75401477547142	-7.92901333707563	1.17027057781386e-10	1.02929238644509e-09	14.1460080137332	10.7224774831186	4.75401477547142	23.2253967585435	4.98129910958935e-30	2.70994420736215e-27	55.8889557287595	0.165454249469416	4.75401477547142	0.283738714474306	0.777680501994588	0.829129688350767	-6.41556917341997	1.71218014998382	4.75401477547142	3.31029241299867	0.00165304892222467	0.00364264458521382	-1.58734115666844	-8.45136473256637	4.75401477547142	-12.4834047906847	1.18951634177207e-17	2.9123134473434e-16	28.7968091737992	6.9973731808017	4.75401477547142	8.51108489175335	1.33423261953779e-11	2.36744934320424e-10	15.6967674022578
374	CACNB3	-14.2594269438027	3.26768505596826	-14.7998365148583	8.67185538717029e-21	2.88636755288658e-19	34.0249749409855	-0.25152604084102	3.26768505596826	-0.357241845265636	0.722283665346138	0.768218372133503	-6.35776645069025	-2.41332209558908	3.26768505596826	-2.81630514708513	0.00674086332484701	0.0161618862908585	-2.62323852725493	-0.940679200755921	3.26768505596826	-0.982569462000913	0.330140109077376	0.421944661934128	-5.67325582821936	4.78036384925652	3.26768505596826	5.94561105237848	1.99501157786407e-07	9.9996028152291e-07	6.99782564576905	9.10904945317663	3.26768505596826	11.2965514934911	6.28243945095674e-16	1.16763952204369e-14	25.190627870585	3.97554097855561	3.26768505596826	2.65102182316065	0.0104723158709597	0.030353027076188	-2.72906317698254
375	MDFIC	-14.5234177501717	2.98200648815199	-14.8617717740727	7.21500390872714e-21	2.45768611405973e-19	34.0035546490783	1.9713772511865	2.98200648815199	2.57780591987758	0.0126642674826624	0.0212636934241537	-3.24372663199965	10.1874632680458	2.98200648815199	12.5343470375973	1.00735050884358e-17	4.03931690258734e-16	28.8564600223168	3.50155833592537	2.98200648815199	3.53390907492678	0.00084062564247015	0.00268712429504347	-0.683046884035347	2.93401745098719	2.98200648815199	3.32642456098821	0.0015755799536939	0.00348853952790704	-1.29551432058366	-11.4846477007482	2.98200648815199	-7.77097793270122	2.11673735713305e-10	1.44982985759248e-09	11.9776924041195	7.41364914477512	2.98200648815199	4.9767922382174	6.77898944976501e-06	5.38985226743611e-05	3.38742869141073
376	CBR1	11.5937034705344	5.05700298220639	13.9739666517605	1.05403626990387e-19	2.71094934569972e-18	33.9994838097252	3.40495535615692	5.05700298220639	4.23857958585535	8.7002390715139e-05	0.000220971239590731	1.13332845176854	-4.56435861221878	5.05700298220639	-4.91980284209648	8.29697709601615e-06	4.16279368093224e-05	3.43720666752809	5.13682217316584	5.05700298220639	5.47655894463547	1.12042669076193e-06	9.21772685412782e-06	5.34793244746431	-4.37038154360952	5.05700298220639	-4.49989386036553	3.58735981490859e-05	0.000113469750667217	2.07748817478482	2.69509268038343	5.05700298220639	2.98889314572788	0.00418604045391403	0.00737116563331853	-2.4034423972312	-13.8958335244123	5.05700298220639	-4.98912554930937	6.48831571392028e-06	5.17490176556602e-05	2.87469477797789
377	SERINC1	-7.40159292842471	5.61266062266356	-13.8893099873271	1.36816229388749e-19	3.41537572628531e-18	33.938648367515	-1.37707647915258	5.61266062266356	-3.03987543626376	0.00362525962795201	0.00678362471260174	-2.5401500694141	1.36702549568358	5.61266062266356	2.64832192539778	0.0105465610494868	0.0238402638187002	-3.41216133388644	-1.12603287081441	5.61266062266356	-1.89562942296937	0.0632906625261218	0.107597295581464	-4.8437025764126	0.644203741654058	5.61266062266356	1.22701113918145	0.225066860480962	0.29009187218408	-5.94981297978015	7.65714153577515	5.61266062266356	15.2600314685118	2.23587932312055e-21	1.02779268010718e-19	37.9479765694349	0.236331505278915	5.61266062266356	0.241914603054621	0.809749864734703	0.871439388453397	-6.07320102062181
378	EPHB3	-15.3989962292135	2.6281530555146	-15.2348975213968	2.40609056079343e-21	9.2825880157883e-20	33.9325828167433	-0.378622245685071	2.6281530555146	-0.495356985134783	0.622329867110535	0.678632729820214	-6.14024545813945	10.8569867597202	2.6281530555146	13.4198066305448	5.90942882553185e-19	2.95036924451186e-17	31.0361003305921	-1.02601488555077	2.6281530555146	-1.0130619934688	0.315485247465917	0.406839357488018	-5.51902087877104	12.8304085437935	2.6281530555146	15.852803048297	4.04966797959212e-22	7.36533363788317e-20	37.1267502014852	-1.89725772274842	2.6281530555146	-1.87414049420568	0.0662490576483787	0.0919148143507338	-4.3804762546761	-4.98650422031596	2.6281530555146	-2.31230233439463	0.0245466026122342	0.0604173870482373	-3.34829863204161
379	ZNF618	-8.35272515176576	5.04389607703992	-13.9431637779667	1.15885365713503e-19	2.94337269274821e-18	33.9124967417243	3.5532254137276	5.04389607703992	7.22529375696783	1.64790709811958e-09	1.11818346398054e-08	11.5529350436488	1.3640794353829	5.04389607703992	2.33735076895298	0.0231042679995148	0.0469788320173803	-4.02446440869384	3.83453572188209	5.04389607703992	6.38757503653156	3.84196173080715e-08	5.04908131977688e-07	8.55044554943678	-0.854031402964335	5.04389607703992	-1.43785690952901	0.15616417260684	0.211057868630662	-5.58653312675881	2.73477140372987	5.04389607703992	4.66739790669805	2.01155773872266e-05	5.41570324585595e-05	2.52235810985693	-2.27985541999237	5.04389607703992	-1.88170855869193	0.0651940681851721	0.133306883048781	-4.30419694019615
380	SOCS1	16.2617419214497	4.37696501188694	14.0052703311577	9.57340033401592e-20	2.50655738822499e-18	33.8599868829845	-8.69637570328096	4.37696501188694	-7.34811876322613	1.03777876087431e-09	7.34522354378374e-09	12.0238969867473	10.0544989091678	4.37696501188694	8.52622064299959	1.26134621206367e-11	1.86998706984985e-10	16.2470381999957	-6.59187332752274	4.37696501188694	-3.65763669107809	0.000572654035259811	0.00193064592820959	-0.336240076264334	0.823385267115428	4.37696501188694	0.627414134212563	0.532994945647949	0.602436302455262	-6.19240638652717	-7.25308621234426	4.37696501188694	-4.75888312954194	1.46192442821784e-05	4.04611421233661e-05	2.98165749683633	-4.59829085458494	4.37696501188694	-1.4921127257266	0.14140775042215	0.243818848493245	-4.64106641495059
381	APPL2	-9.50183720797424	4.14452141901202	-14.1805022948504	5.59917408032756e-20	1.5496627176124e-18	33.8542096503981	0.781215373891079	4.14452141901202	1.46751982634362	0.147954211611598	0.193715599082675	-5.53254966247825	2.43413460307417	4.14452141901202	4.03200877235093	0.00017250095973979	0.000640744812162568	0.577445687407481	1.47222057495353	4.14452141901202	2.17701564805598	0.0338071708076189	0.0636462171304248	-4.12306916394548	3.58513962519967	4.14452141901202	5.70842522315244	4.79144733527344e-07	2.2324286875462e-06	6.16821040355445	0.410979745979136	4.14452141901202	0.590435463057824	0.557327295388558	0.609838687530346	-6.17018065622291	0.818147284876645	4.14452141901202	0.715560625815598	0.477302336309702	0.602306018399426	-5.63144250144189
382	TCEA2	-6.86574808760802	5.74571280583845	-13.8389651850906	1.59842343017736e-19	3.96105660251982e-18	33.847342319212	2.34254251496514	5.74571280583845	5.69697435485724	4.99760951347741e-07	1.94129110964025e-06	5.91764116143973	0.742803616652379	5.74571280583845	1.54443780710733	0.128241315859181	0.198501185718201	-5.58071746094637	2.07598038272095	5.74571280583845	4.02642451860498	0.000175685727794103	0.000687950456587058	0.420875216515179	-1.35616519510428	5.74571280583845	-2.70745710806609	0.00902579362449136	0.0169890423332923	-3.25538985694547	1.92782193354964	5.74571280583845	3.83628318772243	0.000325258340927294	0.000700371290136255	-0.182264927261414	1.1327648348242	5.74571280583845	1.32630881529465	0.190241849353988	0.306681423816139	-5.34825616806187
383	RBM6	-4.23167665101531	6.16878243419247	-13.7927903012324	1.84405107623879e-19	4.48249647052316e-18	33.8410206260386	1.33753399752174	6.16878243419247	5.07212803770661	4.8268990941418e-06	1.54646012185701e-05	3.67073223937615	-0.425870622666955	6.16878243419247	-1.39837647244143	0.167636978117829	0.247626196102987	-5.85581911149869	2.22886031974212	6.16878243419247	6.83195388883838	7.24479721237698e-09	1.18250416038557e-07	10.1192565414195	-1.67000101533963	6.16878243419247	-5.24216621771186	2.62169581823487e-06	1.04836952919993e-05	4.39008162507529	2.67380716017289	6.16878243419247	8.52985041708405	1.24447035497928e-11	1.09739658575446e-10	16.3220205792912	0.0873468115851352	6.16878243419247	0.160600474394532	0.872998988381554	0.916784363485156	-6.2424808370059
384	DYNLT1	-6.72935923592422	7.85295131928355	-13.711925658803	2.37014993465821e-19	5.62703428542981e-18	33.7825937641119	1.3027450959893	7.85295131928355	3.11673923272184	0.00291099355864637	0.00554176998033892	-2.69027901576134	0.420832826148167	7.85295131928355	0.876755263545677	0.384449136190454	0.483409191617256	-6.70969813954763	-0.731419828103452	7.85295131928355	-1.37115952877437	0.175917599838004	0.252235591623191	-6.05573457307521	-0.600212605584823	7.85295131928355	-1.23901275772692	0.22062444208593	0.285051369103792	-6.31090126680256	6.21942218205577	7.85295131928355	13.0218158715546	2.08797764935603e-18	5.74758171856518e-17	31.6476663988775	0.117991565419256	7.85295131928355	0.147081841409719	0.883607521102324	0.924452244728009	-6.57728581160619
385	PCBP4	-13.4882874113444	5.19581928065892	-13.961541579841	1.09510923105034e-19	2.80243404981099e-18	33.7271441354348	-2.51492722456462	5.19581928065892	-3.38489448051018	0.00132262018547332	0.00268290909959086	-1.53585641477271	-6.35210754487374	5.19581928065892	-7.06828432797787	2.97643995625186e-09	2.93466030536546e-08	11.0200016399839	10.2650020967044	5.19581928065892	12.4141048071827	1.49213351800567e-17	2.71381783587281e-15	29.437822475959	-2.4477946173722	5.19581928065892	-2.80845741680945	0.00688578420997507	0.0132674446043504	-2.92437114901035	22.3192987268186	5.19581928065892	30.1213205352853	9.08614794407883e-36	1.32203452586347e-32	67.7755510501239	-7.781184025368	5.19581928065892	-3.8249726494001	0.000337247749495188	0.00167636326432821	0.141752106615479
386	ACTR2	-4.44574592873929	7.16626983653177	-13.7038662828356	2.4302967166745e-19	5.75641210682087e-18	33.7130524444967	-0.705314638611139	7.16626983653177	-2.48838150357928	0.0159034959434767	0.0261422056462735	-4.12636146232225	-0.841699817558339	7.16626983653177	-2.58029471181777	0.0125833770193445	0.0277706814608937	-3.79874528052638	0.612532823863646	7.16626983653177	1.72072236453978	0.0909468086008857	0.145643592075475	-5.42728929494408	-0.420135082662954	7.16626983653177	-1.27951624680924	0.206109314297358	0.268614634180242	-6.13772472986121	1.0928646934371	7.16626983653177	3.24607961027387	0.00199854666006927	0.00372601093406654	-2.08002598170772	4.70749795027099	7.16626983653177	9.52953190198074	3.17721711877998e-13	6.75573201561046e-12	19.8053216782967
387	ZNF358	-6.46742841772123	5.57489404893961	-13.7938979757916	1.83773265263483e-19	4.47782465719754e-18	33.682640437871	0.621001070343252	5.57489404893961	1.59320059076373	0.116870748906105	0.156973305764035	-5.62029922080457	-0.0263125167596625	5.57489404893961	-0.0588585780631875	0.953278984804228	0.968107135330648	-6.74872232680528	1.18641733858639	5.57489404893961	2.35327165989482	0.0222272890552037	0.044319682659994	-3.99226901123593	0.587995692983438	5.57489404893961	1.27749838854458	0.206815162612246	0.269431111691702	-5.9047872469602	4.41449931461229	5.57489404893961	9.67917847803242	1.84978623377385e-13	2.2509047540008e-12	20.4163137397418	-0.316172482044482	5.57489404893961	-0.374944806593591	0.709149558134339	0.797141039583952	-6.06456363552348
388	VGLL4	-8.33409679007842	6.26573901157537	-13.7427255595384	2.15385360625162e-19	5.17382051407376e-18	33.669765065998	1.37375723740778	6.26573901157537	2.76808318553542	0.00767785885288115	0.0134918896508962	-3.36142465412313	-0.65073982089398	6.26573901157537	-1.12834381787894	0.26409327023651	0.359309371808557	-6.21325578586915	4.06388624791501	6.26573901157537	6.7359243113639	1.03960827510075e-08	1.63149619135611e-07	9.74763850461885	-1.46389056216791	6.26573901157537	-2.48627839992353	0.0159879730553083	0.0282214047778708	-3.87122659320563	2.56803207042081	6.26573901157537	4.20821792889978	9.6298963427094e-05	0.000227512164812097	0.909710775859273	2.44305161739672	6.26573901157537	2.59676156391948	0.0120599097929705	0.03418596750387	-3.22804453495836
389	GSTA4	-7.67750253299408	5.74017543331967	-13.7715824623073	1.96936241255063e-19	4.76436013582618e-18	33.6315164460917	2.62640697185546	5.74017543331967	5.7171243130114	4.64047900621678e-07	1.81432931586633e-06	5.99308901182826	0.731886518476752	5.74017543331967	1.36821058094808	0.176833307615211	0.258882742282725	-5.82843479320805	2.74960226964524	5.74017543331967	4.7713895978276	1.3992786295457e-05	7.8738413491287e-05	2.8359008894831	-3.80990749397551	5.74017543331967	-6.56512021947612	1.97476947429676e-08	1.22184158585878e-07	9.17581332489817	7.79173044674306	5.74017543331967	15.128700195661	3.28327979124702e-21	1.46667564358995e-19	37.6602450103412	-2.4122161797509	5.74017543331967	-2.42114095395239	0.0188134327345064	0.0488190604843178	-3.44542079481303
390	BOP1	6.42232782328531	5.20658165408545	13.7567238861267	2.06226692907329e-19	4.97729589398376e-18	33.6244721385573	-0.0444015864968419	5.20658165408545	-0.103144214035197	0.918225265864907	0.935773897621981	-6.79380029896845	-2.04803295280746	5.20658165408545	-4.11068603465404	0.000133148212258744	0.000508479393271583	0.692150496513842	0.609066422908527	5.20658165408545	1.02685479038216	0.309002762091385	0.400253482373236	-5.97808753665929	-4.85370670570324	5.20658165408545	-8.6356372240168	8.40781295661898e-12	1.09365996121538e-10	16.6577863130906	0.531075253860332	5.20658165408545	1.01518410536835	0.314481942226501	0.368538914749391	-6.11227220823371	-0.616328255046636	5.20658165408545	-0.65400615797719	0.515844647225254	0.637761317308717	-5.84836869322897
391	PBRM1	-5.50774355652535	6.46244871670396	-13.6935368048319	2.50965244394901e-19	5.93058239944795e-18	33.5962248142771	0.20472296293359	6.46244871670396	0.592232462599502	0.556132113677684	0.616545725242975	-6.82109834919051	-0.60122342205742	6.46244871670396	-1.50003501629673	0.139348287270778	0.212878701942834	-5.75658482089844	1.93326943854912	6.46244871670396	4.38975704540342	5.22467304902318e-05	0.000243427699013271	1.50842475854427	-1.71386345926624	6.46244871670396	-4.14554146057609	0.000118634557746258	0.000340364217083279	0.682993146505257	5.47664955072476	6.46244871670396	13.9302491382817	1.20588680543554e-19	4.05345119252837e-18	34.326890786333	0.208188485641536	6.46244871670396	0.301786925572516	0.763957479618165	0.838129760700818	-6.28951960296176
392	SREK1	-5.15160531813545	6.68107231412047	-13.6805285452931	2.61333469463536e-19	6.13290642047493e-18	33.592503386149	2.34571603208276	6.68107231412047	7.27777428187648	1.35243343204222e-09	9.36406152641062e-09	11.6222842885467	0.470039387575906	6.68107231412047	1.26881027125425	0.209874872466389	0.299296496229371	-6.11942658119939	2.73910049120225	6.68107231412047	6.87947994117443	6.05851999439007e-09	1.01462211504611e-07	10.2542823702096	-1.34745451811586	6.68107231412047	-3.50211037117085	0.000926775487057337	0.00216007082649997	-1.30267022887745	1.89288719600681	6.68107231412047	4.87857812071145	9.5983872611908e-06	2.75301532681578e-05	3.06191598170907	-0.948683270616417	6.68107231412047	-1.42522134928267	0.159767478941251	0.267460843691098	-5.3597764754332
393	FSIP2	-14.6509377827729	3.50199996364598	-14.4068029277251	2.81682320955746e-20	8.36424034674714e-19	33.5377887438246	1.36187514001855	3.50199996364598	1.71988799291172	0.0910995703866643	0.125861248560523	-5.00227530313909	0.972345308074217	3.50199996364598	1.03657598166388	0.304488616153994	0.401348072412117	-5.75900959995787	4.15463633988795	3.50199996364598	4.12438414167404	0.000127250243987189	0.000522809090362855	0.991025127779464	1.09262850459735	3.50199996364598	1.15768981735966	0.252014473670258	0.319380083557084	-5.61608999988847	8.85634742024974	3.50199996364598	10.002296779509	5.79947442062618e-14	7.77205881237864e-13	21.1185683398509	-1.78689493005495	3.50199996364598	-0.894257150238426	0.375097397209852	0.507634680240691	-5.23521033293593
394	HNRNPR	-5.83449094159216	8.33510468588086	-13.6218899046199	3.13736066827281e-19	7.14854997905113e-18	33.5234113238539	4.19138281542733	8.33510468588086	11.411954293302	4.23841310836663e-16	1.57998729449088e-14	26.3503136182484	0.584945781003372	8.33510468588086	1.36563858045393	0.177634941320294	0.259757627759827	-6.22728375569741	4.01527690390917	8.33510468588086	9.05724043940047	1.77750161195294e-12	8.62088281797174e-11	18.1398126206211	-1.4167244527322	8.33510468588086	-3.23322918769252	0.00207541283017297	0.00448418493443641	-2.28537658728023	1.71279879666798	8.33510468588086	3.86661476073155	0.000295095092181574	0.000639613431340568	-0.440318138875677	-3.2531889026835	8.33510468588086	-4.31964288421871	6.62473923307077e-05	0.000408927085386823	1.40538203055186
395	ABCA7	14.6631628878366	3.0685045372781	14.2746968743116	4.20336600197823e-20	1.20037562749859e-18	33.5209595263442	-6.090664383136	3.0685045372781	-5.90639410769523	2.30703422626223e-07	9.61028367872424e-07	6.84832016332335	4.65218441193252	3.0685045372781	4.27351303265448	7.7381619078068e-05	0.000313372481236629	1.45076776251338	-13.4086848730596	3.0685045372781	-7.6443018631507	3.40624695848995e-10	8.42054011461653e-09	11.7106903308141	6.06791468562276	3.0685045372781	5.47004779727911	1.1473427955365e-06	4.95786439225254e-06	5.34015913330613	-5.04978255174171	3.0685045372781	-3.67046022376315	0.000550110313525489	0.00114065015131456	-0.274233151710062	-0.834130177454528	3.0685045372781	-0.33753429962311	0.73700441660285	0.819206589883229	-5.41257982255186
396	AEBP2	6.37607486255768	4.66451289804731	13.8309990193979	1.63830146356728e-19	4.04021801608541e-18	33.5005137353923	1.02957432008	4.66451289804731	2.37766526389732	0.0209412380937946	0.0334987450895709	-3.92343771003298	-1.48242277946537	4.66451289804731	-2.82629511420679	0.0065604574036848	0.0157776289625808	-2.74498622486011	0.268311684307246	4.66451289804731	0.476665385926963	0.635496767062962	0.709688276346865	-6.25706473465745	-1.91847922559069	4.66451289804731	-3.60205706561231	0.000680986249478489	0.00163427072359529	-0.659350311696332	-3.0552336055301	4.66451289804731	-5.34521745826193	1.80621590024872e-06	5.89058883894755e-06	4.92356776477032	-1.21782525635877	4.66451289804731	-1.22018901152824	0.227621171786426	0.351367328682139	-5.14463975871811
397	ZNF580	-6.33486248689405	6.13562579196891	-13.6814721728865	2.60566962750067e-19	6.12904045175388e-18	33.4815791106909	3.1687092816526	6.13562579196891	8.11040042547226	5.93601266768143e-11	5.60837560485486e-10	14.7506203627586	0.573703240693832	6.13562579196891	1.26725330668326	0.210426731696406	0.299831597975363	-6.01898052171657	1.64189263359156	6.13562579196891	3.37601318023882	0.00135839282130847	0.0040787826901612	-1.54994180340246	-1.45564989765598	6.13562579196891	-3.09060114893131	0.00313760246438753	0.00652439385459106	-2.34642460557369	2.7840636721853	6.13562579196891	5.97885324935149	1.76358710378553e-07	6.85839429249928e-07	6.99574726647221	-0.377856443573272	6.13562579196891	-0.440211240283321	0.66151659763738	0.761900005043831	-6.09609615877905
398	TRAPPC1	-6.51135260492478	7.50292871813793	-13.6183647497736	3.17206374201089e-19	7.21148866347788e-18	33.4754165362475	1.22791927497326	7.50292871813793	3.00955564349554	0.00394966075790192	0.00733673077133523	-2.91866103608598	1.52625727420349	7.50292871813793	3.29523919895256	0.00172857232728993	0.00490932742385543	-2.04625615438089	1.64331941437437	7.50292871813793	3.2566177096613	0.0019375232464673	0.00554161029634076	-2.07357130484042	0.143714479428347	7.50292871813793	0.3054941082999	0.761147955990465	0.807446300568991	-6.97612276643989	3.97597583921027	7.50292871813793	8.3334790183251	2.58243625824853e-11	2.12113816856945e-10	15.5392254070306	-2.00583367726496	7.50292871813793	-2.38283410713202	0.0206774412084163	0.0526499346769301	-3.77870696590322
399	ZNF581	5.13114187284878	5.7662564373371	13.670584362458	2.69551334386725e-19	6.29674390075412e-18	33.4647503006465	-1.60426840935779	5.7662564373371	-4.62323618162733	2.3447594214422e-05	6.64848961786995e-05	2.20494694248464	-0.627197092752723	5.7662564373371	-1.56152028429183	0.124161337168063	0.193420498479156	-5.54136496845639	-0.278626729275362	5.7662564373371	-0.626776401737123	0.533409856708001	0.617501635663899	-6.44106826029281	0.248109672093615	5.7662564373371	0.605532143841107	0.547326665223856	0.616037361620618	-6.52571266112436	-2.95870208179456	5.7662564373371	-6.59234762040945	1.78291874446098e-08	8.35666240788544e-08	9.28389532169725	0.0895427682380578	5.7662564373371	0.12425977081936	0.90156453762038	0.936746431354911	-6.16190128793406
400	ACTR1A	-5.90679652604843	5.53674607537271	-13.7138367989665	2.35610975503444e-19	5.60677052687518e-18	33.4404952958679	-1.06949202600001	5.53674607537271	-2.95430818242522	0.00461140844322946	0.00847783303146066	-2.78055949219256	-0.0754978998818769	5.53674607537271	-0.179121275081689	0.858503481537063	0.899759359670419	-6.70511743088277	1.15058590792668	5.53674607537271	2.46315947056854	0.016943684511739	0.0352618362795386	-3.74248363216709	-1.93757430196619	5.53674607537271	-4.40776823629903	4.91433736390636e-05	0.000151766300944167	1.64060673998848	5.37903755859541	5.53674607537271	12.9867026163613	2.33621565811902e-18	6.37918404234376e-17	31.3091217353754	2.45973728737441	5.53674607537271	3.35967472935133	0.00142660913420274	0.00575712825561891	-1.19694518142754
401	CARNMT1	7.32493077833924	3.9330324031799	13.9539822806083	1.12088743706792e-19	2.86121266830495e-18	33.4402563103104	-0.964826909955352	3.9330324031799	-1.94604880014897	0.0567870286552891	0.0822725301357212	-4.65295065007662	0.9212328351817	3.9330324031799	1.65787892720282	0.10305948980584	0.165300929712202	-5.05113908017497	-1.3234164236508	3.9330324031799	-1.95899307855822	0.0552125610597223	0.0960608019120724	-4.37879633030818	0.277000068905886	3.9330324031799	0.464125991518383	0.644397069528669	0.70360013556899	-6.19178961400013	-7.12013577699877	3.9330324031799	-10.0003005987233	5.84097627965217e-14	7.81739072381831e-13	20.59517721465	0.885215428178103	3.9330324031799	0.784436677810819	0.436163728838889	0.565484792260732	-5.43294937387126
402	LSAMP	-17.255375301115	4.27477243104407	-14.1153794819861	6.83123069591997e-20	1.85042778292407e-18	33.4250880592874	4.55951835698674	4.27477243104407	5.14883292230132	3.66770796673762e-06	1.20336113866731e-05	4.15302143754398	3.13188813795578	4.27477243104407	3.13059458295693	0.00279718657723494	0.00745014259653188	-2.03374790337382	15.2589746814847	4.27477243104407	15.3366233389223	1.78875818049803e-21	7.92108785581408e-19	37.5191274999806	-5.51588065014223	4.27477243104407	-4.69195444450864	1.8468014581041e-05	6.22424647610531e-05	2.73794599720611	3.43943178296303	4.27477243104407	3.23971065906261	0.00203630146719369	0.00379154121450964	-1.69866147968415	-3.61855700813306	4.27477243104407	-1.58481568652999	0.118765920612164	0.212663660589819	-4.61557390948402
403	FIGNL2	-14.4833667521074	3.66385362294617	-14.3171531895336	3.69510150324877e-20	1.07221107722475e-18	33.4027660332424	-6.37858699898345	3.66385362294617	-8.41814934919044	1.88446347519991e-11	2.00347186794479e-10	15.8538819510909	5.06497854902315	3.66385362294617	6.14641032693679	9.45768017444391e-08	7.04140881408708e-07	7.71252129155436	3.13389460743699	3.66385362294617	3.38227228183066	0.00133308805197733	0.0040121742945633	-1.2038557416761	5.14695145179966	3.66385362294617	5.96581482022194	1.85099752629554e-07	9.34675746421423e-07	7.07509736072417	2.36787081175708	3.66385362294617	2.54383413113577	0.0138166955351698	0.0219331427720862	-3.2944410109513	5.14825833107395	3.66385362294617	3.44033173510136	0.00111873206586805	0.00469673787752106	-0.879907518323462
404	NT5C3B	-7.03356972133266	6.38912257428203	-13.6317851427083	3.04198879755262e-19	6.96239458496033e-18	33.3809005534649	2.05185543759884	6.38912257428203	4.77696289132758	1.37221590387223e-05	4.06043549707689e-05	2.61732801858648	0.999869791223494	6.38912257428203	2.00825958406687	0.0495575201820062	0.0893509192872602	-4.91032057403556	2.49355482692602	6.38912257428203	4.71533548685458	1.70223923523128e-05	9.29116109905178e-05	2.557628664715	-0.559468036556034	6.38912257428203	-1.09683479272501	0.277512892586117	0.347488174451635	-6.23677352341612	4.35207000224543	6.38912257428203	8.61473411883528	9.08458915552334e-12	8.19544203268425e-11	16.6209314128096	-2.30431230010508	6.38912257428203	-2.50592244107961	0.0152144736446731	0.041092393018031	-3.35440143353943
405	NLN	5.81430571460229	5.37425042341036	13.6795236371522	2.6215226616695e-19	6.13797892163306e-18	33.375002792288	-1.24084694980015	5.37425042341036	-3.1219636052577	0.00286758024016412	0.00546627451732576	-2.26870371137549	-2.17258552812056	5.37425042341036	-4.73615555593005	1.58287501036948e-05	7.49144144080536e-05	2.73739364799548	-2.10811091333676	5.37425042341036	-3.92829748577242	0.000241840187763669	0.00091261293529936	0.254273980710523	1.31195103393837	5.37425042341036	2.82727026734579	0.00654308848287435	0.0126840955648471	-2.89648965403658	1.5507078391726	5.37425042341036	3.28081252678318	0.00180400196141118	0.00339187003451594	-1.70993245758957	-3.1554211964558	5.37425042341036	-3.44616756876463	0.00109909694952063	0.00462001751170762	-0.883793844538985
406	PAPSS1	-10.6684084676461	6.55770503029442	-13.6155011457461	3.20054032311573e-19	7.26002298239057e-18	33.3305679526115	-5.61584600174031	6.55770503029442	-8.72197109160351	6.10901551089288e-12	7.36335183176852e-11	16.9652148895856	8.31306890207023	6.55770503029442	12.3637948237424	1.75970040709967e-17	6.78884418420839e-16	29.5290183707864	1.1965582880359	6.55770503029442	1.5085071723127	0.137172211881489	0.20518416478381	-5.69762720159245	0.264259982732569	6.55770503029442	0.360740355052274	0.719681239158881	0.771005934662165	-6.82418090359765	-0.865394879354285	6.55770503029442	-1.10126949280379	0.275595813253418	0.327837346179171	-6.22683560050834	7.37576217590194	6.55770503029442	6.86191448629303	6.47249463680076e-09	8.40846401477242e-08	10.274576486991
407	AARS	6.46293795868207	5.37356835650178	13.6570793075577	2.81132882753028e-19	6.55226180970158e-18	33.3278302140749	-0.0851649072694629	5.37356835650178	-0.193662585266216	0.847156557835659	0.876591439759849	-6.77190643524458	-1.04138061706034	5.37356835650178	-2.07150566460248	0.0430351588645488	0.0796064462468997	-4.60550811219291	-0.685447462917186	5.37356835650178	-1.19994875757541	0.235324223988217	0.319527692483668	-5.83843794651729	-1.76449997456509	5.37356835650178	-3.21208060976576	0.00220801057161357	0.00473045596800257	-1.86429590640307	-1.02857610305262	5.37356835650178	-1.82358394895398	0.0736735180005266	0.101072842246143	-4.95115948112543	-1.85786889381738	5.37356835650178	-1.85613986172961	0.0688165380281191	0.138544463296381	-4.41123916083764
408	GPR160	23.200706038658	2.54410690939241	14.5916507229172	1.61471863103684e-20	5.13934664284693e-19	33.3212952466103	-2.55025008936533	2.54410690939241	-1.57635930619526	0.120702243095048	0.161586796256975	-4.90463314236674	-8.32738644786287	2.54410690939241	-3.8952829740039	0.000269072758337487	0.000954547559619403	0.343426459380994	-12.3031169836312	2.54410690939241	-4.25535156849792	8.22466787492695e-05	0.000359058046747239	1.10057104592557	7.23609902611815	2.54410690939241	4.22907614207078	8.98144450468932e-05	0.000263240323108664	1.33804412860583	-6.69584773983002	2.54410690939241	-2.77697198314564	0.00749659447434001	0.0125291786546034	-2.45810307210319	-0.560203804086704	2.54410690939241	-0.14839454364442	0.882576425790602	0.923847985270019	-5.33646041034184
409	GSTK1	-9.01119019577707	5.59566048935215	-13.6387032729513	2.97706006342311e-19	6.88892884542823e-18	33.2250146727071	-1.58779722174044	5.59566048935215	-2.91680684681592	0.00511787819357493	0.00931146648831023	-2.89776407870298	1.05635765167418	5.59566048935215	1.75031360209527	0.0856644784593357	0.141707440816686	-5.29471246153584	1.24911962352351	5.59566048935215	1.81781370264186	0.0745637539183841	0.123264378129969	-5.05651838099506	6.97697539331655	5.59566048935215	11.9584046806021	6.72645419019669e-17	3.35828117289967e-15	28.1433231497466	-1.78533113895709	5.59566048935215	-2.31923640984497	0.0241395083490935	0.0365049580602105	-3.99588844340541	3.10186588796035	5.59566048935215	2.81750089380509	0.00671903084691637	0.0208447545464037	-2.59261450707617
410	EID1	-9.48130697681548	8.2672620525425	-13.5205943300599	4.30643956939869e-19	9.47323693613945e-18	33.2056449925072	3.67153201165472	8.2672620525425	6.38532533516633	3.87445475793867e-08	1.92588197704272e-07	8.12479407283236	2.15117167631964	8.2672620525425	3.23491276989766	0.00206518602059024	0.00571263433452242	-2.32478721827507	3.84945475596763	8.2672620525425	5.51059959920605	9.89547604088423e-07	8.28827495694127e-06	5.08271222383883	-4.68186883299525	8.2672620525425	-6.59008558962479	1.79812360487624e-08	1.12424118573754e-07	9.0381762524365	4.59169032423099	8.2672620525425	6.82909397256973	7.323164268476e-09	3.6978893442949e-08	9.87783000725459	-0.100672958362253	8.2672620525425	-0.0913952466225487	0.927512002041459	0.954067130859394	-6.66568616784953
411	ARF5	-4.89492489592243	7.1876457527494	-13.5285450146303	4.20050264701759e-19	9.28028621689244e-18	33.1916137870882	0.379902079258012	7.1876457527494	1.22012042532007	0.227646958892301	0.284367621960508	-6.38800336049238	0.552784929977743	7.1876457527494	1.54589165030867	0.127889961238029	0.198047628889968	-5.82853522808089	1.77178608237765	7.1876457527494	4.53616328069781	3.16711472828861e-05	0.000157505192908298	1.87398719983852	2.23111115670233	7.1876457527494	6.3351129849308	4.67530627760663e-08	2.66875760170132e-07	8.15304109832733	0.996013758020001	7.1876457527494	2.65614080406573	0.0103328578577879	0.0167981097017669	-3.61540421434753	-1.0366731104133	7.1876457527494	-1.643052790638	0.106101599478629	0.195167923187617	-5.14220797387714
412	DYNC1I2	-6.46365408478502	6.01412539473775	-13.5939309629225	3.42353350151028e-19	7.69728227657444e-18	33.1839358874252	-0.254524597935758	6.01412539473775	-0.634801641880446	0.52820086287503	0.590529724301008	-6.71552000875397	-0.246436150920571	6.01412539473775	-0.534962672283253	0.594841088255968	0.681721220196584	-6.65312175202733	1.7988381417328	6.01412539473775	3.56757040462345	0.000757766449983151	0.00245478730695878	-0.973987095307095	-2.39191032513993	6.01412539473775	-4.96434640867381	7.08527519197537e-06	2.59955071434687e-05	3.44753793629443	6.78726546552045	6.01412539473775	14.9538906169751	5.4930079211821e-21	2.34084877310626e-19	37.2043649000864	0.770421551528052	6.01412539473775	0.958458378352917	0.342043755079273	0.476568487754089	-5.80548790577936
413	RHOBTB1	-11.7560876095148	3.53574476025533	-14.1565447487259	6.02383434078916e-20	1.65371301242419e-18	33.1654659955739	1.44632495263459	3.53574476025533	2.22607303355632	0.0301434450047615	0.0465591427621316	-4.1168175855207	6.65126621733662	3.53574476025533	8.97875323981617	2.37111133381107e-12	3.91406303644502e-11	17.6995063818348	2.40081769461619	3.53574476025533	2.94462101831586	0.00473757204599192	0.0119288433345928	-2.32391670914556	-3.32888728118805	3.53574476025533	-3.98584776620067	0.000200593843110792	0.000545394632163217	0.564267763394024	-1.23772675200753	3.53574476025533	-1.4516963984217	0.15229057116873	0.193522079520089	-5.21364633149362	5.82429277812293	3.53574476025533	4.14020946071527	0.00012075102832682	0.00069028046733023	0.993948196070166
414	TTLL12	8.5457876485135	4.04275819004025	13.8085034023647	1.75644232658608e-19	4.29001561061851e-18	33.1583327367703	0.363272828600087	4.04275819004025	0.621834483996158	0.53663076378526	0.59850901545695	-6.31805799621136	-1.43587059837426	4.04275819004025	-2.15156815790236	0.0358575523631026	0.0681487536514649	-4.19757216352221	0.358430032183181	4.04275819004025	0.470419696663451	0.639923222596468	0.714102993551553	-6.15706616997776	-1.18225896638932	4.04275819004025	-1.64316751501054	0.10607778177338	0.149826959833848	-5.01525579252608	-3.51600700884341	4.04275819004025	-4.43951424133559	4.41048714824449e-05	0.000111383118286313	1.96228381612237	-3.1333539356898	4.04275819004025	-2.0074402527569	0.0496473238940074	0.107532751702948	-3.8956228337797
415	SH3BGRL	-6.61238679120651	6.62003007887302	-13.5362029102049	4.10096268352268e-19	9.08006628949533e-18	33.1415977913675	1.63956061068871	6.62003007887302	4.00191406081823	0.00019034872392985	0.000454241273014415	0.0471723539512627	1.82483080612879	6.62003007887302	3.87778509621479	0.000284679943500396	0.00100292813024958	-0.231403830318607	3.14567519380117	6.62003007887302	6.29899537802496	5.351312319819e-08	6.64672146065323e-07	8.11595010794341	-3.70546692708816	6.62003007887302	-7.44909010162088	7.09695160649844e-10	6.08950733885312e-09	12.3483938256284	0.791574013943328	6.62003007887302	1.60701519093304	0.113801639242895	0.148770337015644	-5.60722190429564	2.91621309373268	6.62003007887302	3.63108895148083	0.00062216523815854	0.00284507395156698	-0.564983346241544
416	RTF1	-4.79730405085004	7.52842083961944	-13.5042849354455	4.53229960472136e-19	9.92719816647033e-18	33.1330390812375	2.32857611578575	7.52842083961944	7.59430862185927	4.11033725706257e-10	3.16909802900698e-09	12.7212282796929	0.906307348156861	7.52842083961944	2.58315191057787	0.0124910922991255	0.0276148849721279	-3.86677713424584	2.67967445420854	7.52842083961944	7.21228859539817	1.73061340740219e-09	3.34464849229437e-08	11.410117425818	-0.82481080676733	7.52842083961944	-2.29130981354733	0.0258165626108502	0.043218555258302	-4.48033352762184	1.71920896815793	7.52842083961944	4.68137397837871	1.91610340567751e-05	5.18340323687263e-05	2.29271280614424	-2.0116520286917	7.52842083961944	-3.14617681126452	0.0026741875867949	0.00978326169953524	-1.94487035019501
417	CXXC4	-17.5451411951328	3.24993924546223	-14.4607522751776	2.39352857613901e-20	7.25538349642139e-19	33.1047818641608	4.87164099806	3.24993924546223	4.95540899473843	7.31356549598462e-06	2.2765484283803e-05	3.6174370784347	-2.70742216637268	3.24993924546223	-2.18430569455735	0.0332390952753273	0.0641539104375987	-3.8917136258959	7.37375938436156	3.24993924546223	6.46854870864538	2.83674918435118e-08	3.90436357332659e-07	8.76520007249132	8.51271352827014	3.24993924546223	7.93420488511864	1.14772857783847e-10	1.15624288479573e-09	13.9142073704753	6.82695976502077	3.24993924546223	5.99138208976216	1.68345726070424e-07	6.58701966971673e-07	7.11884440502477	-7.33251031420702	3.24993924546223	-2.43489411527656	0.0181819601933703	0.0474934732459502	-3.15262599571963
418	PALM	-10.0922006017237	4.4450527759722	-13.8262903754638	1.6623450997371e-19	4.08960986493293e-18	33.0713041947	-0.226318652869923	4.4450527759722	-0.396807221586683	0.693051646917027	0.741697070909943	-6.57601165004812	5.11770013003374	4.4450527759722	8.226656606645	3.84554605878722e-11	5.25730021593931e-10	15.2129544128015	-3.20457152690653	4.4450527759722	-4.01956565663302	0.000179675194717313	0.000700877770277989	0.617998859466892	-3.25492307904959	4.4450527759722	-4.48795456139892	3.73724222640863e-05	0.000117990737991234	2.04489765154008	8.33166589348037	4.4450527759722	12.9014522174192	3.07077333068272e-18	8.14474645130301e-17	30.725309245592	3.32864783703561	4.4450527759722	2.77152863791427	0.00760712386837056	0.0231003448417872	-2.55042750556116
419	CBX5	-7.14367675348809	7.7831223767174	-13.4744589685878	4.9768619257543e-19	1.07620676674751e-17	33.0500586908399	5.14764246375676	7.7831223767174	11.510296131448	3.0347441370495e-16	1.17524216866347e-14	26.7097830775706	0.910191639334461	7.7831223767174	1.75384699579842	0.0850511064733333	0.140920158375987	-5.56939273339663	4.80238614769364	7.7831223767174	8.87255201460294	3.50471661490558e-12	1.53860080701782e-10	17.5033062002472	-2.80182352029664	7.7831223767174	-5.14949129378173	3.65905357600652e-06	1.42732518849584e-05	3.88079047161475	1.30741088636515	7.7831223767174	2.39911769387449	0.0198657451811279	0.0305638390739861	-4.26960142989092	-2.22213086336527	7.7831223767174	-2.45537093007988	0.0172770730549904	0.0455873028666004	-3.68473313313268
420	SAMD14	-14.3149649208693	2.82802232634964	-14.6353589065538	1.41651868137612e-20	4.55118068448449e-19	33.0374934342199	-0.314033686659887	2.82802232634964	-0.423872613926249	0.673318899719905	0.725074327939018	-6.22345665424393	-4.35412844621341	2.82802232634964	-4.69445173457881	1.83080542700891e-05	8.52228211795509e-05	2.78276197447987	-3.07352231962331	2.82802232634964	-2.94190188977599	0.00477355810124691	0.012008400479772	-2.17166274523208	2.36461537844394	2.82802232634964	2.6564214038847	0.0103252627027735	0.0191518485936529	-2.92426054442789	10.7160336558184	2.82802232634964	12.8460773164028	3.66935694614663e-18	9.58266679397524e-17	29.4112495953451	8.97600033910356	2.82802232634964	6.01196744266628	1.5595761821603e-07	1.68622966192172e-06	6.40298215995342
421	SVIL	-13.6814701369768	5.4052995909953	-13.6380817745627	2.98283517018542e-19	6.88892884542823e-18	33.0277665065479	-0.706144061522878	5.4052995909953	-0.903213619616262	0.370368054693542	0.43553846404038	-6.42486590286918	0.753514896572195	5.4052995909953	0.841763159358176	0.403581138482513	0.502687280841921	-6.36150880205093	1.5278634268663	5.4052995909953	1.50464642016261	0.138160484182052	0.206359368146971	-5.48064599645021	-0.0694110642585084	5.4052995909953	-0.0762017144105839	0.939536299590169	0.953580190465956	-6.68446548190145	3.6044594774213	5.4052995909953	3.80307070078186	0.000361682781094531	0.000772320831806396	-0.242504966991782	8.57118746189841	5.4052995909953	6.3691534245966	4.11622290446461e-08	4.90336026689731e-07	8.48629410048781
422	TOP1MT	7.91002482183459	4.4736781387237	13.655652074238	2.82385926983921e-19	6.56643987746858e-18	32.9971496873542	-0.754222161840691	4.4736781387237	-1.38946327684871	0.170315001321776	0.220190186400392	-5.66673753014595	-0.315958105587701	4.4736781387237	-0.505657729038892	0.615126078293833	0.700319596179598	-6.36643891669445	0.183147890785955	4.4736781387237	0.256697439295883	0.798374202474378	0.844298749060486	-6.3296052247278	2.04959378236566	4.4736781387237	3.16968717665876	0.00249818162292899	0.0052854133422376	-1.87831749929976	-8.76376855711034	4.4736781387237	-11.5401797217712	2.74246233515531e-16	5.47685860461898e-15	25.9383826337073	-0.308817670447485	4.4736781387237	-0.2516232532162	0.802274061061201	0.865566157464399	-5.81982215805482
423	UQCRH	3.9117339948635	9.99262613388938	13.4597503298634	5.21211259814323e-19	1.11758666972818e-17	32.9765826016889	-0.612404878985737	9.99262613388938	-2.27827479305553	0.0266342008094904	0.0416440490090051	-4.97587238242206	-1.44458113663835	9.99262613388938	-4.6583676573481	2.07568983711144e-05	9.58771019999095e-05	1.89731424017544	0.915867933256171	9.99262613388938	2.7729513103487	0.00757809193329093	0.0178045827775244	-3.65566518553274	-1.09053674939562	9.99262613388938	-3.46102243494285	0.00105058333313551	0.00242305055434448	-1.84987493038773	-0.672662823500868	9.99262613388938	-2.0848109830357	0.0417621023238442	0.0602901505554008	-5.20675165979313	-1.00741633959909	9.99262613388938	-2.18153927070054	0.0334536726549502	0.0775257465280245	-4.6679997135345
424	ARHGAP21	-7.77733254106138	4.92809043966415	-13.6430857642115	2.9366571999964e-19	6.81317849247457e-18	32.9595302205994	2.07064663761732	4.92809043966415	4.39682583630022	5.10066671766557e-05	0.000134795771975672	1.55571822556016	-1.26260404991721	4.92809043966415	-2.26123775705734	0.0277374760030762	0.0547917364412978	-4.14700023001959	-0.408963903441117	4.92809043966415	-0.664043327779765	0.509448553212488	0.594826672874572	-6.27091846601558	1.67944710411955	4.92809043966415	3.05994068518432	0.00342445108103257	0.00705890189441748	-2.28068791527765	5.55976220181734	4.92809043966415	10.1587834938357	3.32065001925543e-14	4.67138403951886e-13	22.0063142245073	0.139044550865492	4.92809043966415	0.128685569809983	0.898077851435607	0.934705272345833	-5.94431597129846
425	FAM124A	19.6413535174914	2.88927652684465	14.1907173265519	5.42745548854052e-20	1.51034519537664e-18	32.9505082551769	5.07594711963506	2.88927652684465	3.70698348683996	0.00049046242233736	0.00108642013299391	-0.235915722934024	-9.64961649200732	2.88927652684465	-5.42073313365479	1.3730377869804e-06	8.14941134055675e-06	5.058019189363	-9.94653398205348	2.88927652684465	-4.42805156971437	4.58632176049953e-05	0.000219097969656134	1.80458682921036	-0.383395320780753	2.88927652684465	-0.208111113293963	0.835914187351058	0.869552241667912	-5.89836313872564	0.868423491716716	2.88927652684465	0.531190266862914	0.597434699472852	0.646638938802444	-5.90517100257109	-5.60617833400161	2.88927652684465	-1.48137362234305	0.144237748695638	0.247608540445823	-4.48047358587083
426	MYO1B	-6.0026346639446	5.21515565123274	-13.5829891396122	3.54260376893073e-19	7.947449204088e-18	32.9202095197726	-2.61191263547586	5.21515565123274	-6.98509289880327	4.0712422605545e-09	2.53457227529019e-08	10.671983141817	4.56632042798609	5.21515565123274	11.3970713437003	4.45867529678263e-16	1.34353869519915e-14	26.2466282440112	-0.34419774013887	5.21515565123274	-0.717173826756915	0.476314457172025	0.565085934338622	-6.28965338321968	2.06236843800916	5.21515565123274	4.75425774079135	1.48578237487265e-05	5.10033484599863e-05	2.80451761509344	-1.8659606515201	5.21515565123274	-3.81710765865147	0.00034583397520519	0.00074044966101847	-0.106037616379998	4.1960168250842	5.21515565123274	6.00194028571574	1.6187449690411e-07	1.74649549890716e-06	7.15512736429282
427	TSPAN6	-6.44310764986505	6.92953239624931	-13.4514730827531	5.34942066427e-19	1.14221906636457e-17	32.9047159816786	3.75084214948979	6.92953239624931	9.095460022336	1.54510601761065e-12	2.103864276653e-11	18.3096636398518	-0.0706118102768674	6.92953239624931	-0.14702664866026	0.883650878101011	0.918378257452486	-6.89984113056212	3.72892829419444	6.92953239624931	7.41662180578484	8.01921097705531e-10	1.77942622660802e-08	12.2266637350094	2.12184611946023	6.92953239624931	4.51375952835219	3.42064410593022e-05	0.000108668933932936	1.79861247801446	-1.30581255778136	6.92953239624931	-2.50430519863559	0.0152768510499015	0.024050145363165	-3.84288982055979	-1.7820845452212	6.92953239624931	-2.04278792732764	0.0458982049022143	0.100857220480917	-4.34411300009189
428	AKR7A2	-5.40311687797735	6.40465158872212	-13.4674307342966	5.08789938439376e-19	1.09788676334853e-17	32.8995701666541	3.35286117422846	6.40465158872212	9.82801574597198	1.08262852419242e-13	2.01214808739047e-12	20.9486517362169	0.401195376302179	6.40465158872212	1.01164062107734	0.316158459612034	0.412777068471807	-6.35049420142927	3.23675100685121	6.40465158872212	7.72144865783041	2.54929782858824e-10	6.58999958989116e-09	13.3687559997501	0.0897728570660989	6.40465158872212	0.225443879496647	0.822473104784094	0.858639665049815	-6.82125182940443	1.1733402840872	6.40465158872212	2.80632217802447	0.00692570954015157	0.0116476802619623	-3.11042182033861	-2.85080382055779	6.40465158872212	-3.73471143364469	0.000449369087525516	0.00216091792089111	-0.16811963362918
429	TCIM	-33.4401803896283	2.13898354262467	-15.7323313862571	5.71172388922689e-22	2.60869541756842e-20	32.8885159563309	-1.328154182883	2.13898354262467	-0.896692662204561	0.373807577003675	0.438924391489789	-5.77323054057225	-4.77432956469932	2.13898354262467	-2.43194584754853	0.0183157007929466	0.0384075381050363	-3.26756573122075	-6.92199293157368	2.13898354262467	-2.89876929289136	0.00537945961440817	0.0132727219410725	-2.1886090653436	15.5290652166071	2.13898354262467	10.3105488199212	1.93872827222837e-14	4.67913446745164e-13	21.6195496379187	-3.62355405233545	2.13898354262467	-1.40286794348136	0.166299860508603	0.209158320484085	-4.7963789559973	34.5591459045127	2.13898354262467	19.920936590427	9.27277800045851e-27	1.31171172131486e-24	43.153063851995
430	COQ3	7.97524441570914	4.08272768106532	13.7507414359947	2.10091542040279e-19	5.05858712926771e-18	32.888270286587	1.68545340069769	4.08272768106532	3.06592176999695	0.0033666364919993	0.00634045722466954	-2.16862253608115	-1.14511209127229	4.08272768106532	-1.80330121380611	0.07684273114139	0.12946951475187	-4.79045132286398	-0.729899010779043	4.08272768106532	-1.01938640056743	0.312501522374966	0.403707255883945	-5.72721618856969	-2.1603237515281	4.08272768106532	-3.15942368568828	0.00257363478989153	0.00543151063718302	-1.77772325547057	-0.663647461706614	4.08272768106532	-0.983954157244516	0.32946495187144	0.383804247376257	-5.81885488485575	-4.96171550112078	4.08272768106532	-3.1723289649563	0.00247909941327759	0.00914841576964937	-1.61155890168514
431	TMEM169	-17.3706325316602	2.43043180170529	-15.0149512609371	4.58731577253261e-21	1.62793767049633e-19	32.8109809477889	5.16882906084769	2.43043180170529	5.62285606723851	6.56145963645376e-07	2.4834064064393e-06	5.84836067375436	-3.968090416475	2.43043180170529	-3.29377540349151	0.00173608774902421	0.00492531690164276	-1.26633085665947	8.61130060564814	2.43043180170529	8.14966419151985	5.12603887146317e-11	1.62643943631939e-09	14.2676829893245	-5.21469942964735	2.43043180170529	-4.03584651225425	0.000170344663421603	0.000471220860348732	0.739730268668796	20.9830257288756	2.43043180170529	22.0317209542002	6.80932502239178e-29	1.47559522027788e-26	48.1254240933513	-8.20973301758888	2.43043180170529	-3.11554951558201	0.00292096561347704	0.0105384466076031	-2.00429364138701
432	CCDC169	16.6488870733222	2.80213110970137	14.2708685000994	4.25254587343296e-20	1.20983742237192e-18	32.8005585357496	-6.99814509756424	2.80213110970137	-5.88090369055881	2.53533338784962e-07	1.04756067161251e-06	6.70142164863482	2.97945788929531	2.80213110970137	2.33935147819002	0.0229923912516674	0.0467980625296227	-3.55412270769699	-6.19730870697852	2.80213110970137	-3.16336192453839	0.00254443271099138	0.00700947503766821	-1.57902341359132	1.70334939042745	2.80213110970137	1.25802551818156	0.213719641360325	0.277361690526874	-5.24915353655145	-4.28215038656772	2.80213110970137	-2.71564458250787	0.00883186946159805	0.0145672211281581	-2.63602027154572	-3.85409016193449	2.80213110970137	-1.27148087214183	0.208930798083904	0.329627728791528	-4.69253842811949
433	GOLPH3L	5.23756226503782	4.88038246797175	13.5415666504587	4.03266889167824e-19	8.9483077694429e-18	32.7977185198659	0.964556510203956	4.88038246797175	2.70379817564262	0.00911371368724207	0.0157862540654015	-3.2538168824073	-1.54024982457885	4.88038246797175	-3.61978545980788	0.000644465483889128	0.00206022628795065	-0.690658907288707	-2.29113754533897	4.88038246797175	-4.91063652760378	8.57047013450963e-06	5.18350583847866e-05	3.42773613012377	0.433090754374358	4.88038246797175	1.0139011554524	0.315088245287805	0.386414663245791	-6.01277019760698	-1.61239640165604	4.88038246797175	-3.50749330526333	0.000911623748290787	0.00182092329404622	-0.958508628961403	-1.19142575804229	4.88038246797175	-1.47767749517359	0.145222017904497	0.248920607936267	-4.90922974074646
434	ARID1A	-5.68731895910474	6.75009431877498	-13.4147992791042	6.00326960092264e-19	1.26590685062934e-17	32.7885447006689	1.52949869819152	6.75009431877498	4.20369588330289	9.77635471395566e-05	0.000246587847354231	0.686997549276132	1.10591742725665	6.75009431877498	2.64150574457686	0.0107361460193775	0.0241973107340915	-3.61042452877593	1.8273111645741	6.75009431877498	3.96211045336434	0.000216710294855613	0.000828215517112351	0.112362205350292	-1.14858800620399	6.75009431877498	-2.66279407556987	0.0101541386312248	0.0188825820629952	-3.5230819583648	2.65966771584073	6.75009431877498	6.22496597781203	7.05586452514506e-08	2.95129282088716e-07	7.82361885264363	-0.286488040554275	6.75009431877498	-0.402868651344678	0.688613164346716	0.781886853831806	-6.31911798742009
435	PTPRA	-6.20470099103121	5.96495256651506	-13.4505083436847	5.36566096477942e-19	1.14295860848299e-17	32.7619172525305	3.63792309800145	5.96495256651506	9.4502995905782	4.23481116181577e-13	6.70453811850367e-12	19.6167166207669	-1.09765886880491	5.96495256651506	-2.43704408627734	0.0180849869122444	0.0380019788944108	-3.96183727400322	2.84969383350456	5.96495256651506	5.87828487996305	2.5600213428395e-07	2.6126069515852e-06	6.66896044181311	-1.22202429549523	5.96495256651506	-2.6012446256398	0.0119208725339932	0.0217783115262278	-3.5423627392525	1.93088064786798	5.96495256651506	4.125746749951	0.000126677574301686	0.00029303000096813	0.674258632118598	0.105886575957342	5.96495256651506	0.133025528855932	0.894660752779528	0.932281539498618	-6.23034788056229
436	HPRT1	5.72753849375461	5.42083726058248	13.4637415266913	5.147185301632e-19	1.10599329740764e-17	32.7574869519111	2.60168694166957	5.42083726058248	6.65480163392611	1.41016928423038e-08	7.81849437119568e-08	9.44726034654621	-1.43730627932193	5.42083726058248	-3.16812079481131	0.00250956104044615	0.00677801092467357	-2.06308610398221	-0.794489098965891	5.42083726058248	-1.53006893500328	0.131755493589535	0.198422253764514	-5.39832678895185	-7.10069147597654	5.42083726058248	-13.299380186717	8.63949974084019e-19	7.21256597216863e-17	31.8001895895576	-0.441824931628198	5.42083726058248	-0.893080516986536	0.375721540397716	0.431131578295487	-6.19499532946061	1.44508635046838	5.42083726058248	1.76578176469813	0.0830062394702923	0.161247100706643	-4.63685629909976
437	SDCBP	-6.16134858682934	7.18315890912818	-13.3921566538155	6.44681805653141e-19	1.34550905544616e-17	32.756212821283	-0.0343030096198529	7.18315890912818	-0.0863617360161048	0.931493823447913	0.945605959515299	-7.09140909783287	1.6623866653428	7.18315890912818	3.71103389039388	0.00048424273300605	0.00160554845545417	-0.795293151623781	-0.809770464612411	7.18315890912818	-1.61062119176362	0.113011338880072	0.17431780804082	-5.59890054049858	1.08844409146582	7.18315890912818	2.40473438182867	0.0195924682107239	0.033819699552268	-4.19785365756813	1.01725452236723	7.18315890912818	2.12831691238021	0.0378254181235851	0.0550124066241203	-4.73354442761042	3.23733678188574	7.18315890912818	4.45652656562831	4.16156992599001e-05	0.000272400962057893	1.89619686827531
438	RNASET2	11.2846603892902	4.96649123922558	13.4817774608334	4.86384594808819e-19	1.05625311260721e-17	32.7365204701568	0.110109154582105	4.96649123922558	0.137639847220445	0.891029838716499	0.913819243512993	-6.70979592561101	-1.84515864137263	4.96649123922558	-1.94047142226321	0.0574771729705017	0.101053859261964	-4.7484913662404	-6.45591872731821	4.96649123922558	-5.15834474058023	3.54460855012524e-06	2.46092965801128e-05	4.29788785453609	1.31037811928587	4.96649123922558	1.39014786217469	0.170108152520098	0.227251259915631	-5.61594604270486	-13.3890149741817	4.96649123922558	-10.3872393436102	1.47862750359279e-14	2.22121255517589e-13	22.21774757398	8.98494467971439	4.96649123922558	6.46238161380537	2.90308324710034e-08	3.51580295739797e-07	8.75555353699759
439	METTL8	7.27562874971477	4.50545083879672	13.5719683705596	3.66677606558947e-19	8.18993733070807e-18	32.7258078294472	-0.684111592280704	4.50545083879672	-1.35553579099721	0.180810675924315	0.231963312040452	-5.69635754859942	-2.77601995229069	4.50545083879672	-4.59007103766751	2.62988860735208e-05	0.000119258305725205	2.36975811614556	1.22312366933282	4.50545083879672	1.79680107539544	0.0778822458822238	0.127899173542478	-4.77628068383136	-2.00466208716477	4.50545083879672	-3.21810263411558	0.0021694628658476	0.00465472493967934	-1.71265659631094	-2.81591881784196	4.50545083879672	-4.27454812319598	7.71129248791841e-05	0.000185409617538831	1.39862186384724	-0.218039969469462	4.50545083879672	-0.187951259525919	0.851609496514189	0.901771266427023	-5.80300548483359
440	CTNNB1	-6.05634975298121	7.52153358546016	-13.3685883669096	6.94382469684336e-19	1.44038400279734e-17	32.7096710833964	0.0384797481355026	7.52153358546016	0.0985414701997615	0.921862119748985	0.938728823199702	-7.14788946946757	2.57683932854358	7.52153358546016	5.84568965144049	2.887999613972e-07	1.9955411172527e-06	6.34291244658611	1.26338405862532	7.52153358546016	2.59496015355238	0.0121161932974462	0.0265326658212189	-3.74544754152565	-0.73948974221025	7.52153358546016	-1.62933506009012	0.10898106808271	0.153501891636343	-5.7001948257946	-0.975720394721827	7.52153358546016	-2.03573242998688	0.0466263407554654	0.0666604829582278	-4.94995346253959	3.89285675460888	7.52153358546016	5.82091690659604	3.16483503894762e-07	3.26584041253106e-06	6.50319456152839
441	IFT57	-8.47271858857121	6.14669550182284	-13.4272436808431	5.77278846820662e-19	1.21983092424656e-17	32.703620592734	7.12667287040379	6.14669550182284	13.6521730340984	2.85464120774227e-19	3.27266186711152e-17	33.5432823296508	3.10936117397454	6.14669550182284	5.16864717787584	3.4158649373783e-06	1.86245098432537e-05	4.09356908179853	4.61306360966422	6.14669550182284	7.31324313349249	1.18337511040274e-09	2.46981055316636e-08	11.8764592459389	-3.07701465259222	6.14669550182284	-4.82423121832441	1.16239128641611e-05	4.06836950245639e-05	2.95850513458556	1.26848003665531	6.14669550182284	1.97443323455987	0.0533835423919021	0.0755154693418782	-4.87239326940363	-4.56784444953442	6.14669550182284	-3.5433946934759	0.000816441303828534	0.00358116049935126	-0.653110082399973
442	ACKR3	-18.7286335929242	3.328970009121	-14.3267509550944	3.5891118504853e-20	1.04742418903131e-18	32.6995070937662	1.89202098104559	3.328970009121	2.09890399804094	0.040449523561597	0.0607761051188923	-4.35234499924009	9.36933684679537	3.328970009121	9.56671091448699	2.77707163271166e-13	5.31663055999404e-12	19.7487299049751	-5.32603417116662	3.328970009121	-4.02089031233449	0.000178897951009272	0.000698380847462411	0.71018443705841	8.38600302129876	3.328970009121	8.29704561102509	2.9578400704913e-11	3.3735275608011e-10	15.3189193881652	-4.90375801555403	3.328970009121	-3.71065771334001	0.000484817181992131	0.00101476839264074	-0.190623737081728	9.31106493050515	3.328970009121	5.33353569619542	1.88431654759369e-06	1.68496611389304e-05	4.65035257561293
443	NF1	-6.04528935962303	5.36340130570047	-13.4902261541978	4.73660475136892e-19	1.03081879044215e-17	32.6992157392287	1.62321405362313	5.36340130570047	4.25228563505018	8.30967544371226e-05	0.000211638020490646	1.04557895812564	0.470839278453904	5.36340130570047	1.07213337043196	0.288361744823444	0.384520079998269	-6.10501806911164	1.34151155799331	5.36340130570047	2.74525402661022	0.00816205000554253	0.0189535976530895	-3.04718824030741	0.597280751543061	5.36340130570047	1.33319256684621	0.187987693170225	0.247595325868194	-5.76966700141664	2.13457124304749	5.36340130570047	4.55969188453736	2.92061011084507e-05	7.61556937505301e-05	2.17427801262182	-0.122127525037868	5.36340130570047	-0.148044520934434	0.882851340104749	0.924040787068839	-6.05340480425871
444	ILK	-4.02706428700119	6.29730660738782	-13.394645627634	6.3964798524531e-19	1.3404968579678e-17	32.6670809563133	-0.673730459527834	6.29730660738782	-2.58367281872419	0.012474333989846	0.0209759107952092	-3.78577183641354	2.73742977495069	6.29730660738782	9.34537050573092	6.20170515825594e-13	1.11009432402174e-11	19.250585835147	0.0598362035194322	6.29730660738782	0.179422978459379	0.85826774124241	0.889089008793552	-6.71745083673548	-0.232167007213538	6.29730660738782	-0.759113290752681	0.451039645271459	0.523275861383963	-6.52247898274995	-0.413273294398424	6.29730660738782	-1.29839481404972	0.19959248992109	0.246346280882974	-5.94711746021213	2.54896906967086	6.29730660738782	5.03728779244249	5.46599042809245e-06	4.43948265630954e-05	3.88666390584472
445	KIF5B	-5.69418118214122	7.81205148463057	-13.3368811073571	7.67430233734596e-19	1.57269153532935e-17	32.6277832961087	0.799360724001025	7.81205148463057	2.17566576520382	0.0339132911489819	0.0518862656380323	-4.90777389022092	-0.0893602430070839	7.81205148463057	-0.210469446582049	0.834082372873038	0.880506733800983	-7.05621967243449	0.0339997015917906	7.81205148463057	0.0737011279580661	0.941516720275714	0.953974114206938	-6.99146035898432	-0.351051666779263	7.81205148463057	-0.820297095482239	0.415602679925649	0.488281612070912	-6.72241143475547	2.79582391320228	7.81205148463057	6.46796084819533	2.8430066307851e-08	1.2840808219311e-07	8.61010039691117	2.50540875313249	7.81205148463057	3.78327896498502	0.000385219041703536	0.00188809236754115	-0.287004213557026
446	HDGFL3	-6.07032759286716	6.67152586940932	-13.3549630765564	7.24868260774744e-19	1.49147136080621e-17	32.5932654612399	2.13863673833435	6.67152586940932	5.52682401768969	9.32604280145296e-07	3.43777582094819e-06	5.20596084160407	-1.19772557448711	6.67152586940932	-2.65082222092109	0.0104777883868939	0.0237127331313137	-3.56739254738246	2.22155755982125	6.67152586940932	4.63960529930709	2.21539630414765e-05	0.000115474981359999	2.28184795680476	-2.84347671453815	6.67152586940932	-5.98514515600031	1.72288405631743e-07	8.7694023556187e-07	6.9897272164991	4.16648317091599	6.67152586940932	9.21344382407624	1.00340339879457e-12	1.07236764078937e-11	18.7751560749376	1.58485241282081	6.67152586940932	2.08543640987842	0.0417030757817072	0.0934123217146882	-4.31748277398049
447	COMTD1	14.4977836715856	3.79899279629728	13.6917893032033	2.52333489785895e-19	5.94911248488274e-18	32.5866653489998	-4.20176035470872	3.79899279629728	-4.00839191089593	0.000186362469664666	0.000445982554871857	0.556245009368407	-2.3229172558661	3.79899279629728	-1.883209452599	0.0649865437441788	0.11212738404785	-4.56782858818786	-8.79750304883271	3.79899279629728	-4.81819559914334	1.18732098823311e-05	6.84760150914733e-05	3.08248791763162	5.73454035200107	3.79899279629728	5.02739899682487	5.66207473087772e-06	2.12406007859999e-05	3.85561821889409	-1.512277327207	3.79899279629728	-1.18626001969695	0.240640298164743	0.291187054390865	-5.54039065127986	-3.39786603697213	3.79899279629728	-1.27092873523	0.209125722285404	0.329815032746492	-4.85451225315255
448	SLC29A1	10.3749616897325	4.69360378940521	13.4656025006347	5.11719231930189e-19	1.10187322985391e-17	32.5827572212109	2.06194665496464	4.69360378940521	2.83169297066175	0.00646484568156861	0.0115294087317066	-2.92620851684872	-8.53872347997033	4.69360378940521	-8.78461579784678	4.84708233464797e-12	7.60670779328037e-11	17.0782996000914	-5.20791354456587	4.69360378940521	-4.8588297323368	1.02908197060284e-05	6.04103738938903e-05	3.29778625761061	4.03752891744887	4.69360378940521	4.73688019908493	1.57887162199213e-05	5.39443390472656e-05	2.81083442917449	-6.07593596084687	4.69360378940521	-5.96564909656691	1.85213578138191e-07	7.18628683176181e-07	7.07437193976566	3.34813572323706	4.69360378940521	2.19401925592243	0.0324952187723613	0.0756143027636509	-3.7795043815257
449	RABGAP1L	12.7532489478354	4.42533362697585	13.5086680977207	4.47044576784291e-19	9.81282115204311e-18	32.5605022366636	-2.86139036900523	4.42533362697585	-3.11002525976086	0.00296769027002878	0.00563811329980286	-2.1327122687954	-5.3061092013383	4.42533362697585	-4.65783956316564	2.07950157792305e-05	9.60096263424584e-05	2.61547479421967	-4.37126123289463	4.42533362697585	-3.24689478331521	0.0019937622778821	0.00568013113293125	-1.51696263960651	0.814448211934345	4.42533362697585	0.759397712761217	0.45087094223472	0.52313972962641	-6.14474859086361	0.344246873069778	4.42533362697585	0.313100789558039	0.755393320422867	0.790392538371369	-6.3666678032416	-1.37318322960135	4.42533362697585	-0.635514637392973	0.527739365558728	0.647593426291042	-5.59033338907999
450	IFITM1	18.4373528546974	5.27259208810032	13.3433792230076	7.51850849942985e-19	1.54387115053817e-17	32.4403454130537	0.619677363336081	5.27259208810032	0.453907173784779	0.651689274164968	0.70558682442545	-6.66626472517332	-3.48312217628401	5.27259208810032	-2.19064196271079	0.0327521778675728	0.063322120649436	-4.33455115453676	-5.32599003305324	5.27259208810032	-2.7037582465937	0.00911467745574351	0.0207912631325303	-3.02595145938715	-2.92229575766407	5.27259208810032	-1.70320756778183	0.0941982593759152	0.135375937878326	-5.1408971545448	-4.41695127234989	5.27259208810032	-2.5590434699742	0.0132894643140749	0.0211754058258531	-3.47153345288847	-2.9086709786823	5.27259208810032	-0.852689917630673	0.397544891960321	0.528658405094121	-5.56100106199149
451	MMRN1	-18.3704332602842	2.09910159339506	-14.6588272304773	1.32046432240403e-20	4.25599022901426e-19	32.4093713405223	17.9811859191447	2.09910159339506	17.8063844652814	1.92803337112454e-24	1.0909455491613e-21	41.1248156818835	-19.1335660454756	2.09910159339506	-9.70665672314335	1.67530702745588e-13	3.33261759270277e-12	16.3072057647914	6.60085351640936	2.09910159339506	5.16619380459107	3.44609917758161e-06	2.40730590697316e-05	4.241755862388	-12.9066071445828	2.09910159339506	-7.063228358376	3.03364679012858e-09	2.26383878847981e-08	9.41478513317754	3.71050233906724	2.09910159339506	2.88897318962917	0.00552666815128427	0.009490008290486	-2.28271628842354	22.1180646757213	2.09910159339506	14.7075245347937	1.14167192039439e-20	5.35849240056075e-19	30.5738662969626
452	CUL5	-4.49830606814992	5.63533816349719	-13.3592223683406	7.15195414495481e-19	1.47454763089807e-17	32.3949622866633	1.40497173758736	5.63533816349719	4.83436825930652	1.12167083062406e-05	3.37794719394028e-05	2.93950351662841	0.914902034123636	5.63533816349719	2.78029511251874	0.00742984627373797	0.0175575369600977	-3.10259411724452	1.30510568385283	5.63533816349719	3.56390872719573	0.000766387378295676	0.00247798585648935	-0.918070873651525	0.0389494907727963	5.63533816349719	0.112897341239216	0.910524743889863	0.930906897863708	-6.66582018904186	1.09661806800992	5.63533816349719	3.04477353043292	0.00357524968974658	0.00638322478281844	-2.35846651749162	-0.262240946196627	5.63533816349719	-0.420770818688544	0.675568981245432	0.772112823130067	-6.02251385175822
453	TSPAN14	-10.2354589957919	5.55122708414084	-13.3674992440001	6.96770834187832e-19	1.44240059882176e-17	32.3681543068145	0.678901165424953	5.55122708414084	1.10285395899247	0.274913119888859	0.335810761101947	-6.26798756123162	-3.95840254005554	5.55122708414084	-5.31997035428968	1.979198428263e-06	1.14081131815839e-05	4.70114906771628	3.13514034782088	5.55122708414084	4.04625730374625	0.000164625527848976	0.000650704030024591	0.498568763734448	2.73361198515373	5.55122708414084	3.88326650421422	0.00027969940756325	0.000736869753241517	-0.0690085470950486	3.05166516129195	5.55122708414084	4.06683886437187	0.000153860228786489	0.000351045347264873	0.537744589046866	4.59454287615587	5.55122708414084	3.82711372288958	0.000334946046679002	0.00166736338486101	0.0936061907693357
454	ZSCAN10	26.8366805113651	2.76555809125095	14.0650761772929	7.96849224497503e-20	2.10802840298885e-18	32.3582247501699	1.38823963690512	2.76555809125095	0.72390649267797	0.472204014264119	0.536096066265909	-5.88358993225001	-5.39671011439975	2.76555809125095	-2.25267537219041	0.0283070964312997	0.0557439630999203	-3.64542812286234	-10.0241687808408	2.76555809125095	-3.21607662329417	0.00218236030495174	0.00614299290649712	-1.44826483329234	-1.35757061091464	2.76555809125095	-0.56560735776842	0.573970730752603	0.640420884078088	-5.77957069995815	-6.27362997049776	2.76555809125095	-2.23931161367472	0.0292168358453313	0.0434413829320729	-3.58442524965571	-5.17284067161722	2.76555809125095	-1.01768722252987	0.313301276813356	0.445795379129032	-4.90323171002506
455	PYCARD	13.8442426873358	4.16032455914722	13.5025442280835	4.55710379361706e-19	9.96010775493342e-18	32.3459632266546	-9.55191723499991	4.16032455914722	-9.05445057151149	1.79578425396647e-12	2.40658718771691e-11	18.0581625193736	5.55773985781463	4.16032455914722	5.07912237783963	4.70775644067034e-06	2.50514625643821e-05	4.00079172367966	-9.81021671611459	4.16032455914722	-6.11697971415798	1.0553487335926e-07	1.20501422103595e-06	7.45648069307019	4.95132467149738	4.16032455914722	4.43247056824277	4.51774116690785e-05	0.000140541214981541	1.88026105180627	-17.8515854047977	4.16032455914722	-9.1132869020132	1.44742040395951e-12	1.49569332255632e-11	16.7491236938127	12.8604121392644	4.16032455914722	8.3608705670096	2.33204888450235e-11	4.04632332004368e-10	15.1309655356315
456	FAM92A	-5.97002866754007	5.87170489995369	-13.3162615623715	8.19065054059209e-19	1.66510530450959e-17	32.3361010208631	3.37751506965895	5.87170489995369	8.95826418607048	2.5565774388969e-12	3.30860752416327e-11	17.8538886082294	4.17477703699427	5.87170489995369	9.94222023671956	7.18907729538728e-14	1.53502625269433e-12	21.3566406380318	1.88047955363913	5.87170489995369	3.98422680748269	0.000201656562296255	0.00077687765530833	0.274639909066527	-1.62538803284829	5.87170489995369	-3.52330052900918	0.000868481268101713	0.00203812942756128	-1.11165946936466	0.0652916943454338	5.87170489995369	0.138085045182862	0.890679644312895	0.910800419410325	-6.69413709146665	-1.90264665424942	5.87170489995369	-2.24673796239005	0.0287081447820408	0.0685884247255655	-3.79600488197617
457	PHF20L1	-5.37996140317321	5.65707518210081	-13.3303317768012	7.83463353196442e-19	1.60232414704935e-17	32.3183040501068	0.349788446411639	5.65707518210081	1.00987248887112	0.31699726093296	0.38086788989055	-6.33930439326972	0.218468195479188	5.65707518210081	0.545026789826724	0.587947771980639	0.676103427528826	-6.57112229444539	1.14362636753171	5.65707518210081	2.63335386260272	0.0109669674678819	0.0244203243682504	-3.373749134264	-0.445861273558808	5.65707518210081	-1.0890858645368	0.280885042290227	0.350934023028209	-6.10051419719695	2.34072370275304	5.65707518210081	5.62377501643402	6.53937883140433e-07	2.30541963993953e-06	5.7810332695943	1.77321596455642	5.65707518210081	2.43180827535275	0.0183219629553541	0.047787245249752	-3.41587772847907
458	RRS1	8.13568577273008	4.9640763514513	13.3635387582346	7.05526242322713e-19	1.45756283530565e-17	32.3133373180874	1.14015408879927	4.9640763514513	1.98820511014321	0.0517962612698202	0.075764027148229	-4.78018158227801	-3.05867043859531	4.9640763514513	-4.44886885031144	4.27187241177844e-05	0.000183504936794447	1.86237610887728	0.00683280179965351	4.9640763514513	0.00895189864955256	0.992890042159441	0.994452264666526	-6.42672070502135	-0.554445122458093	4.9640763514513	-0.792250190934004	0.431633087779765	0.504149426495057	-6.1926435382142	-3.14416884634647	4.9640763514513	-4.13912805297553	0.000121184717849918	0.000281218125154116	0.936032426861669	-2.52538825592914	4.9640763514513	-1.86007861591576	0.0682476733997263	0.137862466000836	-4.30621773099687
459	MRPL33	-3.77433096160056	6.86572316495779	-13.2491650829939	1.01275381871442e-18	2.0265024840091e-17	32.2963400689707	2.27447732365047	6.86572316495779	9.18643609705117	1.10749769014926e-12	1.56014716101939e-11	18.6351600324717	0.0541289542795242	6.86572316495779	0.18975606089047	0.850201817687641	0.893356598901127	-6.91273419584261	0.772914084870444	6.86572316495779	2.47671264641033	0.0163773456694791	0.034286385538262	-3.91475142660452	0.549881759327223	6.86572316495779	1.90890182625169	0.0615200696133474	0.0931858877174216	-5.13287459974262	1.51478963664727	6.86572316495779	5.07903516053527	4.70922414939913e-06	1.41819775167446e-05	3.7412351463706	-1.39186079717437	6.86572316495779	-2.74777966667545	0.008107133778548	0.0243860477065893	-2.87642259861101
460	TCF4	-6.93592892040928	6.96902447547706	-13.2324531184021	1.06783405455893e-18	2.1325274207221e-17	32.2445198188359	1.09143107625984	6.96902447547706	2.47183088598233	0.0165793380345194	0.0271261940372017	-4.15811304932547	4.79787239238415	6.96902447547706	9.8653234180438	9.46949667457247e-14	1.97232768160574e-12	21.0782149649798	-1.70812074683394	6.96902447547706	-2.99879810379386	0.00407112818124477	0.0104562570286962	-2.65882311968271	-6.98472690767701	6.96902447547706	-12.3995165709425	1.56517811936432e-17	9.26822043356139e-16	29.5807323036084	1.50023048311512	6.96902447547706	2.83269294151402	0.00644727530608977	0.0109205885568808	-3.1481026822343	8.23924262316111	6.96902447547706	11.3273654262763	5.65481268455406e-16	1.64555049120523e-14	25.9009712786604
461	LARP1B	7.00074302980529	4.52703718296803	13.4033614474279	6.22332365319641e-19	1.30689796717125e-17	32.2248848662899	-0.173727797774966	4.52703718296803	-0.353581450933368	0.725010051009577	0.77047447511817	-6.53452499337759	-2.91377734676233	4.52703718296803	-4.90609267388887	8.70930515780187e-06	4.35251585045202e-05	3.4182523618834	-4.70791822838549	4.52703718296803	-6.65907075079047	1.38773345611271e-08	2.09393559266784e-07	9.48019333370367	2.18760902245234	4.52703718296803	3.80718298794675	0.000356968834849055	0.000916492962676487	-0.0825613861677814	0.682011486079788	4.52703718296803	1.12213014898473	0.266702608352515	0.318448542329468	-5.78816741265012	-2.07494016541463	4.52703718296803	-1.75989665078317	0.0840094042079291	0.162792195939452	-4.39166800657338
462	WDR4	9.1978512614667	3.71512333747609	13.5257476262447	4.23747137491726e-19	9.34169825834033e-18	32.1729752447511	-1.22601893317141	3.71512333747609	-1.89436831627903	0.063461128511661	0.0908690557980131	-4.72252784602916	-0.671888946856875	3.71512333747609	-0.870521371453494	0.387815178716181	0.487040393985734	-5.92176971717312	-1.12838036808325	3.71512333747609	-1.26009284631492	0.212978620168594	0.294526442147608	-5.38654122009864	-0.843447235832113	3.71512333747609	-1.05069581243508	0.298012401883188	0.369522317163412	-5.70838223889257	-5.78886747596718	3.71512333747609	-6.55697184633699	2.03608886130508e-08	9.46920778648048e-08	9.05803660820408	0.46075169844412	3.71512333747609	0.300977913580175	0.764571023249032	0.838139691291722	-5.6136209284195
463	TCEAL9	-8.40540997504056	7.5265212184741	-13.1936950858433	1.20754784196683e-18	2.38813102338489e-17	32.1588967160927	-0.964242908196488	7.5265212184741	-1.76470928900629	0.0831883048465596	0.116131938437278	-5.60338801910045	5.92201291584161	7.5265212184741	9.97298858253798	6.43984806936546e-14	1.38961552090015e-12	21.4430672241155	-0.860028817493041	7.5265212184741	-1.23699807770387	0.221365632858292	0.303610149563925	-6.14984962955654	1.258689695161	7.5265212184741	2.04372441282628	0.0458023021361019	0.0718571237301599	-4.98976104148285	-1.08403730438463	7.5265212184741	-1.62616817801069	0.109654768658324	0.144088997391953	-5.65148215071935	4.13301639411211	7.5265212184741	4.07366072189371	0.000150444631543219	0.000834574385766713	0.6676971484151
464	ZSWIM6	-9.98231320910757	4.56822538390092	-13.441377659382	5.52186078659915e-19	1.16923393163227e-17	32.1442685157847	1.45638922059541	4.56822538390092	2.38264487743221	0.0206870459910101	0.0331389687666622	-3.95298229747938	-2.04847473531706	4.56822538390092	-2.75277871419189	0.00799943773112633	0.018734024670389	-2.95473441752746	3.19465244508585	4.56822538390092	4.05817596843888	0.00015830578535156	0.000631054569004163	0.692311971111661	-2.23067185456726	4.56822538390092	-2.89087676319326	0.00549777348516551	0.0108370085052082	-2.58127755222208	3.62516141452407	4.56822538390092	4.8528342588631	1.05105685784885e-05	2.98772372235292e-05	3.22024839189606	5.98525671878656	4.56822538390092	5.16323955863937	3.48285582409477e-06	2.96348258716835e-05	4.2799066014248
465	ADCY6	-15.4899157629135	3.10661545996035	-14.1249976151312	6.63326774843491e-20	1.80641262079705e-18	32.1393555783762	0.951682760832746	3.10661545996035	1.16015006756552	0.251020109601205	0.309881963627941	-5.71097120171215	-1.33209547974439	3.10661545996035	-1.28977815892198	0.202547495387841	0.290147150566127	-5.36422236289247	10.4461736771049	3.10661545996035	11.1820641560991	9.29850733941902e-16	1.10122438665096e-13	24.6845698988258	6.00051258807559	3.10661545996035	6.47666188609537	2.75177734455627e-08	1.64670107252089e-07	8.84042533671247	-3.34633291285022	3.10661545996035	-2.88893696592406	0.00552721935976072	0.009490008290486	-2.32701582421095	2.76997512949488	3.10661545996035	1.48163955792381	0.144167133846077	0.247605284977503	-4.66454216327125
466	OGDHL	17.0721479214609	1.41483662305288	14.9367736255413	5.77805406733962e-21	2.02231892356887e-19	32.1023567573189	-4.33933008512211	1.41483662305288	-3.7752712087494	0.000395153791123635	0.000890801541078844	0.0196927403327445	4.27994462097671	1.41483662305288	3.44329281534447	0.00110872800899575	0.00332422572023011	-0.871897440454733	-7.24222199797908	1.41483662305288	-4.19587101044245	0.000100349019333321	0.000425774257692149	0.898301638300565	-2.39150717196146	1.41483662305288	-1.54351861914858	0.128463856334537	0.177579312807717	-4.58742246579545	-6.3889356046426	1.41483662305288	-3.59671196707472	0.000692379519799974	0.00141178887070325	-0.634129647721638	-0.990097682732412	1.41483662305288	-0.373210563411355	0.7104323791537	0.798207808238327	-5.14970363274451
467	MAK16	7.93407431880342	4.37312014258172	13.3710687359855	6.88974104682891e-19	1.43208188901944e-17	32.0696017233425	-0.966776930886609	4.37312014258172	-1.71783469644074	0.0914764031792338	0.126310091068217	-5.1304160183635	-0.579870168370058	4.37312014258172	-0.910012298649218	0.366803624876556	0.465822309148095	-6.05052350002872	-1.33391181564055	4.37312014258172	-1.70287938213597	0.0942600862668998	0.149818816889572	-4.87109237875674	-0.193658175456918	4.37312014258172	-0.284459626134482	0.777130952915631	0.821407093757337	-6.34429224247426	-5.29360847421022	4.37312014258172	-6.85975595455237	6.52527688124254e-09	3.32133658348102e-08	10.1956445055211	0.433751245760938	4.37312014258172	0.345260781684221	0.731220861420592	0.814555886860847	-5.75827473717276
468	EFS	-11.0918795231413	4.41159796027026	-13.4580744420827	5.23962203976166e-19	1.12112500997841e-17	32.0607898955564	3.44570615738118	4.41159796027026	5.30019368314972	2.12602624481496e-06	7.32281951418342e-06	4.65870561764611	1.42007537095097	4.41159796027026	1.92969260926074	0.0588312621108169	0.102972401546429	-4.75334189150463	3.2376352249062	4.41159796027026	3.85531641307889	0.000306002081391935	0.0011210903593442	0.0801239183746869	0.0775734498465797	4.41159796027026	0.10115331817061	0.919798159309585	0.938127804182669	-6.49389948784207	5.14805863226024	4.41159796027026	6.59614247310196	1.75769796581974e-08	8.24984045247654e-08	9.31716594583426	-2.23716931220386	4.41159796027026	-1.3381125496561	0.186389044439087	0.301842628334745	-4.95896948913531
469	APIP	5.98590671356183	5.02967257210893	13.2712945724973	9.44217425026003e-19	1.90432761859205e-17	32.0517791072839	0.138507078321813	5.02967257210893	0.32996602776486	0.742684426532608	0.785405553341773	-6.65843675858212	-0.970115674815918	5.02967257210893	-1.99616738283135	0.0508972072682095	0.0912494377797419	-4.66443832068445	-1.23706063830279	5.02967257210893	-2.20069755572158	0.0319923233283599	0.0605766523702074	-4.13917348463018	0.429168008953643	5.02967257210893	0.860211287711176	0.393422553988597	0.46672834713137	-6.18230446507637	-2.31374373428313	5.02967257210893	-4.21411720685394	9.44202832516199e-05	0.000223592323859044	1.15198195667099	-2.03266175343545	5.02967257210893	-2.09082610040292	0.0411974078854445	0.0924913571234033	-3.93469412975698
470	CCDC14	-5.71235410062239	5.66212025646165	-13.2280777591308	1.08274934200594e-18	2.15808259262828e-17	32.0150380343776	3.69047358696008	5.66212025646165	10.0272832459126	5.30446731958489e-14	1.07407553976088e-12	21.6581917397615	-0.495421675582895	5.66212025646165	-1.15842178094609	0.251718340056947	0.346406065866775	-6.06088834727112	5.00938445803868	5.66212025646165	11.1956065423932	8.87633462204721e-16	1.06359374265354e-13	25.5454317559895	-1.34239816458993	5.66212025646165	-2.99460127107498	0.00411945386667089	0.00835623135471878	-2.51335957432214	1.21924064832392	5.66212025646165	2.67433082968219	0.00985092950698635	0.0160762244878475	-3.29898365340693	-2.36892475252746	5.66212025646165	-2.83816911018954	0.00635183440825158	0.0199363431272858	-2.4617039681989
471	CEP350	-4.73438559373634	6.17809255284273	-13.1819986623463	1.2532450968601e-18	2.46309642245338e-17	32.0013165091092	1.09468745308173	6.17809255284273	3.56899696717495	0.00075443290362521	0.00160717404798636	-1.18787578023287	0.259490026876628	6.17809255284273	0.739846112302449	0.462553021212	0.558870953329699	-6.5706587985446	2.51822337548918	6.17809255284273	6.5790855570039	1.87392634242317e-08	2.71879484296011e-07	9.19230576840075	-0.0389563207944548	6.17809255284273	-0.107371055902617	0.914886976641343	0.934522500961997	-6.79533487834981	0.757503308659772	6.17809255284273	2.00267406736311	0.0501725122967766	0.0713398070281543	-4.82592809356113	0.143437750423484	6.17809255284273	0.235977321053763	0.814330513459107	0.8743419139078	-6.27857318431955
472	KDM5A	-5.20925855809081	6.01462792776254	-13.1881353844834	1.22905500241283e-18	2.42126212757731e-17	31.9854543363261	0.143170916905627	6.01462792776254	0.4237080633866	0.673438191555142	0.725126121259025	-6.8365284155777	1.01165513418002	6.01462792776254	2.63209514596227	0.0110030092732107	0.0246840637549891	-3.53571513730542	2.19974473494348	6.01462792776254	5.15683498084297	3.56387222956071e-06	2.46757570755104e-05	4.12945824392208	-0.937194789271104	6.01462792776254	-2.33177959620419	0.0234183634253685	0.0395942947356205	-4.15816769298658	0.599010218009613	6.01462792776254	1.42336940794597	0.160300986845829	0.202513712605404	-5.72763984407876	2.19287234332317	6.01462792776254	3.36093259024874	0.00142124412555339	0.00573963973781176	-1.2590258458102
473	CFL2	-7.77849246388828	5.15433715975037	-13.2791966174594	9.20898832402733e-19	1.86468282465643e-17	31.983142626019	3.32209891263853	5.15433715975037	6.80455215392185	8.0314100421103e-09	4.67956350473269e-08	10.011001487658	4.23983151182817	5.15433715975037	7.83209870557357	1.68294662857943e-10	2.02610063972595e-09	13.7940007819559	0.195992995253427	5.15433715975037	0.316595196723656	0.752754363984096	0.80841069732031	-6.5030436678033	-3.12404074983158	5.15433715975037	-5.15755057537426	3.55472883183449e-06	1.38982392139095e-05	4.21094933473958	2.34496692007251	5.15433715975037	3.77214268172663	0.000399101591436593	0.00084649098475254	-0.255465530848658	0.799642873927212	5.15433715975037	0.719406963819737	0.474948848338658	0.600242464366451	-5.74521085384909
474	YIPF4	-4.78109277729954	5.70715503969917	-13.2158419153794	1.12559033128284e-18	2.23908936017885e-17	31.9796267158976	0.178069753557447	5.70715503969917	0.572875541989224	0.569073551958617	0.629044294193457	-6.68691536930717	0.481344120203469	5.70715503969917	1.35712248312733	0.180309063135174	0.263058004038486	-5.82797194012462	1.48772643111023	5.70715503969917	3.78321293496977	0.000385299972133465	0.00136591723500847	-0.283150214149247	-2.00661230603962	5.70715503969917	-5.32881389734552	1.91682236218322e-06	7.8661934305191e-06	4.75147459421079	4.73127079772235	5.70715503969917	13.2197199837815	1.11182949273014e-18	3.2170407339365e-17	32.0063792180826	-0.0907060192543376	5.70715503969917	-0.136695801838646	0.891772500574992	0.930033065569967	-6.11879936889458
475	KRTCAP3	19.8175219291928	3.47484446719264	13.6363357156769	2.99912075921168e-19	6.89526973647199e-18	31.9721591474752	-0.488345857277745	3.47484446719264	-0.335365671943628	0.738630485545929	0.782280354916229	-6.21752347214553	1.15509190881183	3.47484446719264	0.710169852652586	0.48061183835616	0.575682885294307	-5.93704784948	-12.7055303410582	3.47484446719264	-5.56570898793545	8.08980892890813e-07	6.92392470091842e-06	5.4118435117774	13.7098932173094	3.47484446719264	9.14150151230831	1.30535732244816e-12	2.06125028358674e-11	18.0742494503283	-13.586557552115	3.47484446719264	-5.95406539403384	1.93344283146287e-07	7.46478970373364e-07	6.66111115149893	-7.90207330486313	3.47484446719264	-1.90440717835461	0.0621148972678167	0.128324589994465	-3.96694781881093
476	DHX37	10.4026579041157	2.96220957360767	13.7392310279914	2.17735318097334e-19	5.21796285840317e-18	31.9588984302124	-1.21740571346842	2.96220957360767	-1.66438631072358	0.101746958494683	0.138560338583814	-4.92591871551723	-0.109827395131887	2.96220957360767	-0.131494968033408	0.895865625246806	0.927275548083203	-6.13023788438588	-2.62759598296623	2.96220957360767	-2.5272978871189	0.0144113962959895	0.0307908687381273	-3.078559486317	1.16079492821354	2.96220957360767	1.30633581741518	0.196897955085319	0.257896820028803	-5.25975547676592	-4.98831294900749	2.96220957360767	-4.84294410958434	1.08831645692123e-05	3.08416892424671e-05	3.20039145371698	-2.6203107917552	2.96220957360767	-1.42111394614505	0.160952608703314	0.269135169864267	-4.61206361234782
477	CRB2	-17.0846169772854	3.44388022154033	-13.9048652885984	1.30404660399592e-19	3.27135829105872e-18	31.929064774758	16.785550917483	3.44388022154033	18.0377231316168	1.05202819143046e-24	6.30288654689369e-22	43.514803226987	16.4134070619649	3.44388022154033	16.8924683577258	2.23179770047325e-23	2.22851564503138e-21	40.7304799807045	0.362191530804268	3.44388022154033	0.306639349257138	0.760280676170301	0.814757858459019	-6.14455893915372	-9.36096659613718	3.44388022154033	-6.65131152095968	1.42877964705715e-08	9.13504124625054e-08	9.21022547044087	-0.35361624089332	3.44388022154033	-0.311757728968024	0.756408374931396	0.791373322925143	-6.18374051363105	-6.76194969593625	3.44388022154033	-2.53980286556695	0.0139595852952516	0.0383237187779897	-2.93206680099025
478	GSN	-15.9168413688578	5.55804335533745	-13.2500818758338	1.00981682023449e-18	2.02460321143471e-17	31.8868809179266	-8.56025543657985	5.55804335533745	-9.02278283267197	2.01706952837073e-12	2.66457239253643e-11	18.0985103236639	-2.87676057811338	5.55804335533745	-2.65652884152861	0.0103223559786055	0.0234201816979499	-3.37955517810191	7.49764857230259	5.55804335533745	7.00282595708669	3.80831773233537e-09	6.72230781695594e-08	10.7572796024687	12.6975082594473	5.55804335533745	13.4088762802493	6.11622110217137e-19	5.27912812928944e-17	32.701052099144	-4.82776873535914	5.55804335533745	-3.62583051903091	0.000632446091742472	0.0012989440299248	-0.651361727292862	11.9864692871602	5.55804335533745	8.30006942851722	2.92469851788761e-11	5.03176594673738e-10	15.3955678060822
479	EEF1AKMT4	9.5706635754461	3.99328394543757	13.3770494282861	6.76108186616995e-19	1.40821306353662e-17	31.8787623169234	-1.97416214365739	3.99328394543757	-2.88158909442091	0.00564009012327156	0.0101725372596991	-2.64216406065598	-0.348869691968698	3.99328394543757	-0.444197306310056	0.658650164826428	0.738561260459889	-6.2666558704136	-2.04399748349299	3.99328394543757	-2.21768377026114	0.0307439807019901	0.058594207232367	-3.90903651388101	2.35092032187264	3.99328394543757	2.95455747264753	0.00460820337727225	0.00923181577449211	-2.35236655346468	-6.41154529539851	3.99328394543757	-6.3089178233452	5.15645652975874e-08	2.22159516732626e-07	8.16415128933366	-1.14300928280117	3.99328394543757	-0.713250712930153	0.478718866191966	0.60328528237629	-5.46573895865008
480	CEBPZ	7.51731277880032	6.84491868262283	13.1016268107283	1.61841714924418e-18	3.08681248409214e-17	31.8715977020658	0.53697956046105	6.84491868262283	0.989791829552687	0.326628700587316	0.390734474451704	-6.54678653795459	-2.10090176955045	6.84491868262283	-3.33769161935419	0.001523524377517	0.00438956033522225	-1.79891170795023	0.818782080833228	6.84491868262283	1.1735468694462	0.24565486539195	0.331170721908275	-6.11823490856784	-5.30766645045612	6.84491868262283	-7.65161621208634	3.31390500180351e-10	3.0544907188569e-09	13.1136297159589	0.133435881526217	6.84491868262283	0.20566313025169	0.83781660414767	0.864380278894248	-6.8548167714392	-1.59794208161424	6.84491868262283	-1.45631734030438	0.151014060663038	0.256774325184147	-5.33251528003064
481	SEMA6A	9.53300889760511	7.162021218625	13.0915628269396	1.67117448626969e-18	3.17554331019716e-17	31.8574119223314	1.04362359668404	7.162021218625	1.48960859701255	0.142063694712143	0.186940404475862	-5.97406596657295	-9.1188811888503	7.162021218625	-10.3755988544723	1.54063023689178e-14	3.58249291386822e-13	22.8683808088429	-2.63546292683834	7.162021218625	-2.84194064990384	0.00628686393790399	0.0151805853977127	-3.02305282204604	-1.71488347108194	7.162021218625	-2.07297843682825	0.0428926040219552	0.0678461208205644	-4.82941932001033	4.94988668717553	7.162021218625	6.19619568776349	7.85549139802054e-08	3.25766204759117e-07	7.68097220568209	-2.0572915946941	7.162021218625	-1.42530941575607	0.159742143128269	0.267460843691098	-5.39141558158328
482	FAM71E1	9.11123702424145	4.02880938422459	13.3937866458267	6.41380716766303e-19	1.34136809040345e-17	31.8205429948653	-1.24907614807275	4.02880938422459	-1.90772609574603	0.061675197475619	0.0885608185942732	-4.69528817807569	-1.9185777430586	4.02880938422459	-2.50280308778758	0.0153349949231334	0.0329230445388098	-3.39021098196039	-2.61498159233158	4.02880938422459	-2.86827210515732	0.00585011359332672	0.0142714747180916	-2.42594461689478	0.684600072834987	4.02880938422459	0.892556601415446	0.375999662481308	0.44884629188609	-5.90613676237199	0.191812936814326	4.02880938422459	0.236592589893719	0.813855523789556	0.843153699551053	-6.22434414357049	-4.20501455042785	4.02880938422459	-2.43275158632706	0.0182790629298334	0.0476997837408027	-3.13222314026103
483	AKIRIN1	5.26764970475529	7.7916914672084	13.0673594214466	1.80529871457429e-18	3.40405708621273e-17	31.7931764224352	1.31869767155855	7.7916914672084	3.486945530931	0.000970760474701675	0.00202068167480821	-1.61243960764534	-3.29052459547977	7.7916914672084	-7.35351290181828	1.01691950280596e-09	1.07552701309229e-08	11.9182197241955	2.31056872233845	7.7916914672084	4.92892564142547	8.03329427492871e-06	4.91701335277337e-05	3.16204709171727	-3.26930401517444	7.7916914672084	-7.20462928749337	1.78125248867413e-09	1.40963920723745e-08	11.3798868971321	2.47712630542405	7.7916914672084	5.64401725457719	6.07121976577138e-07	2.15529359757342e-06	5.62566442944442	-4.81421379342212	7.7916914672084	-6.03447230521969	1.43448259753443e-07	1.55759117866611e-06	7.31434704824947
484	GLI2	10.9386019258784	3.28991076885653	13.5945466625152	3.41695514085181e-19	7.69728227657444e-18	31.7833328949546	8.08214260810687	3.28991076885653	10.3900392792995	1.46409333029161e-14	3.50592944409516e-13	22.2840805744912	5.91893936937734	3.28991076885653	6.91634884719703	5.27360692112502e-09	5.01978378426714e-08	10.3520048673244	-0.601413386667395	3.28991076885653	-0.587009363934449	0.559609543783945	0.642853230966157	-5.87668422371779	-9.73197382550815	3.28991076885653	-8.32891869965475	2.62667092507512e-11	3.03317952062246e-10	14.4742227355394	-8.41932033603641	3.28991076885653	-7.48253292194986	6.25790323558584e-10	3.90065755535139e-09	11.8658913485392	-6.18697635515068	3.28991076885653	-2.78528683193896	0.00733061148152195	0.0223874896369718	-2.50685186136651
485	EMC9	5.45926171829142	4.96703754724008	13.1757657976153	1.27830788627288e-18	2.49895697153346e-17	31.7547457741192	2.41897621032973	4.96703754724008	6.3443017102538	4.51734013932207e-08	2.21197640956708e-07	8.35291688441451	0.315664678945388	4.96703754724008	0.72524505506048	0.471389191410104	0.567036602635161	-6.34231597153919	-1.93929552453578	4.96703754724008	-3.79015870772324	0.000376875651772526	0.00134071900569444	-0.129401063982844	0.292577148751943	4.96703754724008	0.627812306944557	0.532735978111613	0.602210425867567	-6.33111767482047	-4.82237687676999	4.96703754724008	-9.2305459873551	9.42640363319113e-13	1.0170330614836e-11	18.6451938298557	-1.7248073550127	4.96703754724008	-1.94681241505169	0.0566930926366349	0.11910460983996	-4.19079048138675
486	ING4	-9.37104721884514	4.86372261655055	-13.2551884570095	9.93614710670932e-19	1.99604848682119e-17	31.7415208034489	3.35715632791824	4.86372261655055	5.8895440564386	2.45554217610041e-07	1.01872493130683e-06	6.70527386537096	-0.964594824714684	4.86372261655055	-1.42587952518484	0.159578204066345	0.237652289576798	-5.57981293370421	3.358742896052	4.86372261655055	4.77040441099769	1.40411656483868e-05	7.89234393646904e-05	2.91599516761139	-2.02675356995679	4.86372261655055	-2.88773831255801	0.00554548779011261	0.0109247182093418	-2.66678434483736	5.73258179767071	4.86372261655055	8.52206388417349	1.2809549475589e-11	1.1256709353656e-10	16.2704063805052	-0.0860854081243438	4.86372261655055	-0.0635131575724889	0.949589123179014	0.967401335527779	-5.90754452334445
487	GFPT2	14.0760705507332	3.40549022652277	13.5460345244087	3.97666186693211e-19	8.8432971866165e-18	31.736732623926	-1.21559020775183	3.40549022652277	-1.18489514441457	0.241175081839546	0.299301597238428	-5.60801063385826	9.41873328322627	3.40549022652277	8.81200720020894	4.38110923531877e-12	6.96124766953537e-11	16.9870172803165	-2.75719415010081	3.40549022652277	-1.97588738537712	0.0532139955940437	0.0931895175329727	-4.20665002022867	-9.58873757442773	3.40549022652277	-6.22334446634485	7.09869761622138e-08	3.89968906263294e-07	7.61531898164836	-6.44273898052984	3.40549022652277	-4.46035013857815	4.10753867917415e-05	0.000104379444729014	2.03259208299971	-3.49054292114923	3.40549022652277	-1.29571914701544	0.200506602116755	0.319736925404595	-4.74724234712548
488	TESMIN	18.3090882192721	2.74568182872448	13.7837039234497	1.89671973117727e-19	4.59954534810487e-18	31.7099272986834	0.18257526371785	2.74568182872448	0.138019307380158	0.89073135254023	0.913605118390961	-6.14888078116584	-4.91778070114648	2.74568182872448	-3.02048486493602	0.0038297238180676	0.00983255283262378	-1.9719721271119	-5.16729011659175	2.74568182872448	-2.7222011048607	0.00867934075966787	0.0199411427108543	-2.60985861730595	9.454993014484	2.74568182872448	6.73615113788521	1.03872214066379e-08	6.89660039286876e-08	9.6201007288776	-11.8625716488577	2.74568182872448	-5.36904442489725	1.65668577836989e-06	5.43950504600173e-06	4.52040978385086	-5.99901403087798	2.74568182872448	-1.72949338892467	0.0893537292239932	0.17045658965094	-4.19264931430624
489	MLLT3	-15.8837080392431	4.24829205094034	-13.5532739040417	3.88758011177843e-19	8.66411453795696e-18	31.700869425605	-0.864567418753826	4.24829205094034	-1.08587617324469	0.282290163682717	0.343544666878776	-6.05846135735588	11.0119898081955	4.24829205094034	12.9544094389206	2.59085098449832e-18	1.13740591711704e-16	30.97940023969	3.31281320359731	4.24829205094034	3.38142011019275	0.00133650681024046	0.004020177750236	-1.30741483837124	-1.06833788661185	4.24829205094034	-1.11001542925554	0.2718422868289	0.341605637427804	-5.85690091237655	0.974358233069716	4.24829205094034	0.991224654831505	0.325935056514648	0.380344701031358	-5.96820381023744	2.5174520997462	4.24829205094034	1.53801249992436	0.129803382110571	0.227750603455235	-4.86197588671827
490	FYN	-10.0233387319341	5.9523650093844	-13.1109350624857	1.57112344304589e-18	3.00787448635758e-17	31.7000274180501	0.0870331333270009	5.9523650093844	0.142070163290824	0.887545919464839	0.910888269825613	-6.93976941032759	-5.03582952825237	5.9523650093844	-6.73086706465584	1.05956230317605e-08	9.4913298661812e-08	9.74277213489768	5.86561741973482	5.9523650093844	7.68043162623923	2.9738851549144e-10	7.49728225316911e-09	13.2323095767976	-7.51992476388394	5.9523650093844	-9.48313549518567	3.75911560865255e-13	6.81256093845663e-12	19.7190687131896	10.7725496309061	5.9523650093844	15.9862596177848	2.77225303711876e-22	1.50991428786388e-20	40.1560711865166	5.85389284010249	5.9523650093844	5.33473153977274	1.87617081134662e-06	1.68063322019044e-05	4.88094737021182
491	GLI3	-14.5211178170269	4.90788172299708	-13.2756554585702	9.31275646983889e-19	1.88195286994661e-17	31.6838659293874	14.209729139301	4.90788172299708	16.6038728265367	4.92877945405285e-23	2.09165078081368e-20	41.4466690683521	6.43187642491181	4.90788172299708	6.76357150731665	9.36969171505775e-09	8.50537523332114e-08	9.90681448037114	9.60670175315015	4.90788172299708	9.7904849600623	1.2389267683676e-13	8.19381112715846e-12	20.7329259039282	-6.82736769897179	4.90788172299708	-6.28356732248884	5.66893721302037e-08	3.18995168589019e-07	8.19693669457838	-3.21731063888496	4.90788172299708	-2.65842134668906	0.0102712767942233	0.0167113345286206	-3.1049574800715	-5.68251116247926	4.90788172299708	-2.42639547222443	0.0185698823868242	0.0482978171884077	-3.20587036471774
492	PRMT3	7.63494550090012	3.92991394324985	13.3229061431333	8.02052592308936e-19	1.63611591402262e-17	31.6608927139591	1.26709524223363	3.92991394324985	2.34984455866077	0.022413513786758	0.0356365476368631	-3.86529893648944	0.00814149454608559	3.92991394324985	0.0132704777630839	0.989460224646732	0.992090213430495	-6.36880346548404	0.157561772362868	3.92991394324985	0.209336462048216	0.834962293746546	0.872957942384957	-6.14836012963713	-0.280572161323468	3.92991394324985	-0.426964071154415	0.671079303004752	0.727044218817509	-6.20273932201228	-5.71926298184572	3.92991394324985	-7.93643260886755	1.13818973695443e-10	8.26851816753271e-10	13.8992644219358	-3.06790886687351	3.92991394324985	-2.20371773171328	0.0317671549152621	0.0743287800844477	-3.5624959715958
493	PCM1	-4.79482946536043	7.05335017644479	-13.0322553571706	2.0194553869003e-18	3.76017424416446e-17	31.6404739417224	3.65326074938962	7.05335017644479	11.5656801488244	2.51564309503181e-16	1.01673908424202e-14	26.9187812472971	-1.5833455054376	7.05335017644479	-4.23076822466387	8.93073885939276e-05	0.000355310840948888	0.855438891924085	2.39681043333193	7.05335017644479	6.11529519641606	1.06198931598518e-07	1.20988380126499e-06	7.42424657725997	-2.8234526826523	7.05335017644479	-7.32883977082868	1.11589396269318e-09	9.18785772839941e-09	11.882827995486	3.0376492158258	7.05335017644479	8.09136548043464	6.37376284758085e-11	4.81578446606907e-10	14.6808721104396	0.113907254902987	7.05335017644479	0.181659602009349	0.856520529491348	0.90513193534648	-6.42306218462624
494	TFB1M	6.86788486066146	4.68124077142228	13.1783917584752	1.26768741530384e-18	2.48296083170569e-17	31.6297589739267	-1.90901736351071	4.68124077142228	-3.89000013578007	0.000273695810688624	0.000636436491293068	0.0436989087883859	-0.612478249322448	4.68124077142228	-1.09331258960996	0.279042143778216	0.37474211951228	-5.92395555950778	-0.172444712437422	4.68124077142228	-0.276973808607349	0.782842904878534	0.83271592545043	-6.36979017381208	3.12552307089323	4.68124077142228	5.48854162944277	1.07251287348298e-06	4.65227581619429e-06	5.38743100701429	-3.25850034161418	4.68124077142228	-5.22738929716775	2.7651337485636e-06	8.72997124275272e-06	4.50999703439583	-4.04096726466993	4.68124077142228	-3.33658903934898	0.0015285457254732	0.00611478327334819	-1.14520780440633
495	CUTA	-6.29590702909877	7.95073521143144	-13.0057527619094	2.19804071391109e-18	4.02644688330656e-17	31.5961554559696	4.04379348187701	7.95073521143144	9.83969722467498	1.03815969486061e-13	1.94726638897888e-12	20.8998836274177	-0.691961095975107	7.95073521143144	-1.43403154716866	0.157248310497905	0.235076184121703	-6.07633653699796	2.82086177597319	7.95073521143144	5.57726739415922	7.75464472350166e-07	6.67537367126599e-06	5.37624410024303	-0.969785668459394	7.95073521143144	-2.00185025873594	0.0502637715333003	0.0780090972684873	-5.12788472807381	3.79476117349959	7.95073521143144	7.80447917956833	1.86667432623133e-10	1.29070454940028e-09	13.549015823805	-2.70176263781651	7.95073521143144	-3.13219812986349	0.00278428806196254	0.0101278478253887	-2.03424697125823
496	MORN2	-8.61878915540779	5.29591786016757	-13.1336045824257	1.46171215842914e-18	2.83033048167316e-17	31.5740676276072	5.23007060279222	5.29591786016757	9.83113217906554	1.07058039459476e-13	1.99704419760946e-12	20.9668541413717	3.80465365140245	5.29591786016757	6.4347585967863	3.21967530531097e-08	2.65740623862174e-07	8.67891983301535	2.21677834940778	5.29591786016757	3.26303243253934	0.00190124232276718	0.00546084406581604	-1.73383776442443	-2.42573843541244	5.29591786016757	-3.75704701709646	0.000418688329844879	0.00105552986125497	-0.357284336424142	2.84154886176368	5.29591786016757	4.43096059277543	4.54106210085594e-05	0.000114283957245411	1.73236602477128	-3.0485238745459	5.29591786016757	-2.30844305470485	0.0247758156518464	0.060907960997841	-3.54033372793205
497	CCNG2	-10.6349721112042	5.02601024878764	-13.1815262395823	1.25512719023398e-18	2.46309642245338e-17	31.5403798798942	1.07372745597189	5.02601024878764	1.61339889997742	0.112405604140621	0.151475400657876	-5.43771643908444	-0.796740584607192	5.02601024878764	-1.01900245534693	0.312682113434642	0.409389107503318	-6.05722932066757	5.33886969996211	5.02601024878764	6.775411791048	8.96166393759945e-09	1.43288143178101e-07	9.95978540831935	-0.307704507621298	5.02601024878764	-0.396928254026641	0.692962914254341	0.747176294905829	-6.49045927449457	6.99873723031386	5.02601024878764	8.97560879738902	2.39866963801797e-12	2.3927963039386e-11	17.8770624449618	-1.67191718281517	5.02601024878764	-1.04877643173865	0.29888715230106	0.429966899178855	-5.37556229388469
498	TARS	6.51220602718016	6.54061650923599	13.0006681187971	2.23409037886725e-18	4.08513653658222e-17	31.5278627734778	-1.45061789597287	6.54061650923599	-3.07097317854139	0.00331852092050251	0.00625562383404	-2.58956213714807	-1.63276996865608	6.54061650923599	-3.01356072967311	0.00390530795153601	0.0100039138547269	-2.63100737140502	1.65019111216077	6.54061650923599	2.75524785268791	0.00794673129841223	0.0185508728568252	-3.18959501703258	-4.85551631352219	6.54061650923599	-8.20262798610153	4.20628059870289e-11	4.64814700145919e-10	15.1367667137184	1.93639376789599	6.54061650923599	3.52919895570343	0.000852886622777259	0.00170997052224141	-1.20304279777581	-2.15988672908579	6.54061650923599	-2.2140814863825	0.031005068946888	0.0729973710642752	-3.97788605237424
499	CPNE1	-5.55590039146473	6.74007420236117	-12.9956189291166	2.27048119211964e-18	4.12207681670919e-17	31.4918556365555	2.34964589135598	6.74007420236117	6.4791898114083	2.72582335544163e-08	1.40427470284132e-07	8.65886631633649	0.957217933503512	6.74007420236117	2.29909598043513	0.0253388746152172	0.0508424818668218	-4.38539308586788	1.22545372041383	6.74007420236117	2.68877460800401	0.0094830079574236	0.0214918638287404	-3.42186511639703	-0.0337836137009413	6.74007420236117	-0.0797340338762493	0.936739422005444	0.951123134394188	-6.89842070515755	0.944403684008664	6.74007420236117	2.12342875919657	0.038250934940297	0.0555519424450199	-4.68242293109208	0.112962775883695	6.74007420236117	0.155948505975014	0.87664700136147	0.919436691264193	-6.3728629214498
500	FKBP7	-14.5945326430672	4.0199119225429	-13.4796553672161	4.89634618177058e-19	1.06104863534752e-17	31.4813974675919	-4.36948351478287	4.0199119225429	-5.68873271540795	5.15140572893115e-07	1.99722372855591e-06	6.05061774922594	10.7069872108014	4.0199119225429	13.4808497428956	4.87802714116601e-19	2.47177643944158e-17	32.5145224948812	3.77099448741745	4.0199119225429	3.95744159451997	0.000220023977771714	0.00083946979792766	0.398418949876017	-3.77664738125941	4.0199119225429	-3.74838883390921	0.000430335103459575	0.0010816789310799	-0.187983923996757	2.93027019924902	4.0199119225429	3.12187832098423	0.00286828403132936	0.005212968033385	-1.97892770444917	5.33241164164161	4.0199119225429	3.64922623855038	0.000587916582550465	0.00271438367782252	-0.334832712208811
501	TLN1	-6.69300782484852	5.87861543716219	-13.0356766982054	1.99749751209666e-18	3.72610112833415e-17	31.4778630215421	-2.98826940654417	5.87861543716219	-6.8610148651946	6.49444092068508e-09	3.87270964737573e-08	10.1592769387553	2.76704744831325	5.87861543716219	5.7066774960781	4.82235998566709e-07	3.16875719058189e-06	6.00487161933258	1.08125158622071	5.87861543716219	1.97511047525994	0.0533045218830959	0.0932921818304116	-4.7997479643115	0.798792313199402	5.87861543716219	1.59481705533128	0.11650821312399	0.162865241650816	-5.5186408106383	-5.40193166001683	5.87861543716219	-8.92031952558918	2.93949229895581e-12	2.88209575430348e-11	17.6902491493276	10.4361175436762	5.87861543716219	15.1400200758513	3.17607101264533e-21	1.61741416318964e-19	36.7807153334306
502	CASTOR3	-10.2215459657044	3.71701373910594	-13.4498341671616	5.37703960626514e-19	1.14295860848299e-17	31.4614035292119	0.687648720318387	3.71701373910594	1.10196395304448	0.275296447433888	0.336117755587887	-5.86979155267226	-2.02813129445952	3.71701373910594	-2.64917656452495	0.0105230072357645	0.0237959211137348	-3.043441749411	-0.072586145800595	3.71701373910594	-0.0855152871961337	0.932163593260147	0.946852118299012	-6.1789366746908	7.21485341681038	3.71701373910594	10.5953350966642	7.11392153183706e-15	1.91680663496721e-13	23.162366663827	7.77120095641518	3.71701373910594	11.0409290183006	1.51115210641381e-15	2.67206322983067e-14	24.5474464674231	-3.35143968757946	3.71701373910594	-1.95397071564759	0.0558189578149409	0.117632130218327	-3.95369489732821
503	PDK3	6.73264191068153	4.80341107087388	13.1165199304192	1.54342184173332e-18	2.97159762912171e-17	31.4595482043914	0.339202527380616	4.80341107087388	0.699753636836258	0.487042802195375	0.5508029025494	-6.38697257797975	-3.81754364429787	4.80341107087388	-6.38667032405791	3.85499598575275e-08	3.11365060387722e-07	8.56699113101799	-1.30973438093994	4.80341107087388	-1.96803566069935	0.0541349847243	0.0944117841467458	-4.49051614163536	-1.34220364653843	4.80341107087388	-2.27625690391191	0.0267628091003535	0.0446046818339224	-3.98939687766256	-0.214647591459728	4.80341107087388	-0.352138402648724	0.7260858698948	0.763728656911963	-6.36107326353894	-0.38771517482618	4.80341107087388	-0.347658152857498	0.729429509119351	0.813388178269191	-5.79145127665447
504	NOCT	14.8819415695123	2.15777879219364	14.0328939445409	8.79496423220848e-20	2.31464368746882e-18	31.4541595961333	-3.84397895323495	2.15777879219364	-3.61312729207116	0.000657956422408289	0.0014170619924357	-0.442474643697704	-3.0758701913668	2.15777879219364	-2.34350520177509	0.0227616636188496	0.0463933447984757	-3.41014265328903	-4.32506359005926	2.15777879219364	-2.98569214640313	0.00422381847845464	0.0108062273808241	-1.99270431014777	0.582839956777471	2.15777879219364	0.449555936979459	0.654804816370703	0.712367769145013	-5.75459733752136	-2.58426642728952	2.15777879219364	-1.74743024797873	0.0861677261134666	0.116348706146846	-4.38329658425889	-1.63560236433925	2.15777879219364	-0.642816456767963	0.523025338573107	0.643296605968433	-5.12996400143383
505	B3GNT7	27.4228839620463	2.34424962895881	13.9236987007262	1.23047723365812e-19	3.10977931136673e-18	31.4260556381054	1.54092812471966	2.34424962895881	0.77683355275788	0.440599303628115	0.505862237341038	-5.7655746055973	-3.40530836633674	2.34424962895881	-1.48458779453902	0.143386101030612	0.217902500392837	-4.91031979986086	-13.2892157115679	2.34424962895881	-3.82636547979838	0.00033574870348106	0.00121737292451214	-0.0163963331972123	-0.300478771784916	2.34424962895881	-0.119175668262974	0.905572247104979	0.927053305534647	-5.82974501061146	-8.35717281804147	2.34424962895881	-2.7603896889023	0.00783799729946877	0.0130496330173283	-2.48740530249793	-3.61163641903499	2.34424962895881	-0.718259159451487	0.475650478115344	0.600905497346165	-5.07206304382027
506	ADAM17	-4.68906114009549	5.29520382187382	-13.0506943092557	1.90393910162262e-18	3.5712006906126e-17	31.3835994563903	3.05574696121548	5.29520382187382	9.91292026584273	7.9842046387275e-14	1.56082772064183e-12	21.2489859718789	-0.140254050416189	5.29520382187382	-0.382264940583861	0.703744220715086	0.776810977347258	-6.56251313611641	0.720260835861509	5.29520382187382	1.81532244444293	0.0749508879541212	0.12381374876992	-4.96063826547867	1.46301917490417	5.29520382187382	4.05315382645605	0.000160939600714488	0.000448596013485787	0.534143717138334	-1.46009334531789	5.29520382187382	-3.62616175508564	0.000631793723802834	0.00129786588885274	-0.679584095875423	1.05038156384841	5.29520382187382	1.60534077764884	0.114170125270071	0.206320568821092	-4.86091259670272
507	FBRS	-9.3740848652813	3.58506755137952	-13.449271782284	5.38655014307153e-19	1.14295860848299e-17	31.3599925336518	-0.293146177348015	3.58506755137952	-0.518610388637453	0.606121583158002	0.663444204671064	-6.32392661989528	2.18346705807888	3.58506755137952	3.32576619929889	0.0015786731340475	0.00452923545641517	-1.37375597906321	-0.423652770562247	3.58506755137952	-0.559553949003224	0.578065010018399	0.659213934537382	-6.0356370111308	2.78630092071567	3.58506755137952	4.23075797837578	8.93104506636339e-05	0.000262140328532885	1.27973198730142	3.49761333477637	3.58506755137952	5.15788598630712	3.55045112529524e-06	1.09812768633866e-05	4.29629497210438	1.62350249962064	3.58506755137952	1.18820057412525	0.239881431221753	0.364927912919126	-5.02241666499638
508	B3GALT1	15.2084092678325	1.94027193370186	14.2279756936251	4.84510558947714e-20	1.36696400079847e-18	31.3175507130317	-1.44167236649855	1.94027193370186	-1.35048864234415	0.182413349304122	0.233747066355778	-5.11033114956849	-4.53354105516059	1.94027193370186	-3.28870139897386	0.00176237834206692	0.00498744746150364	-1.26669027149597	-7.64323622648252	1.94027193370186	-4.50042916601308	3.5807788933618e-05	0.000175675496285597	1.75369589182009	-0.0195675550540984	1.94027193370186	-0.014978836847659	0.988103496703358	0.990719360858037	-5.7828310350378	1.76201642137409	1.94027193370186	1.27862750359387	0.206419975468839	0.253635836669094	-5.00735096512185	-3.33240848601085	1.94027193370186	-1.26473287290433	0.211322374166072	0.332609856418087	-4.64656131637994
509	ZNF664	-10.8075599972682	4.5111028026207	-13.1722206002139	1.29278922736235e-18	2.52242495798573e-17	31.2733864773417	3.50219480230905	4.5111028026207	5.18550299737532	3.2150892793427e-06	1.06698221929311e-05	4.27701197186384	-2.33731503716838	4.5111028026207	-2.83545648647856	0.00639894665690807	0.0154548901353115	-2.72788253010107	3.72371237587102	4.5111028026207	4.66699866868727	2.01435169633576e-05	0.00010624635954003	2.60351185799676	4.42773340515243	4.5111028026207	5.78951845880226	3.55379598855151e-07	1.69931512410315e-06	6.43610696122853	4.82736899336347	4.5111028026207	5.91240192520506	2.25626844589617e-07	8.59711714233166e-07	6.88141037485634	-3.33613454225937	4.5111028026207	-1.82738083965635	0.073092616936704	0.145485304573057	-4.23393169120624
510	WDHD1	7.94202680926312	5.2248944128489	12.9976706488218	2.2556220726903e-18	4.10241264470548e-17	31.2726243301584	3.24447976951004	5.2248944128489	5.64538353410996	6.04084364949719e-07	2.29683525533737e-06	5.83145995686482	-1.68766572891246	5.2248944128489	-2.51428959480691	0.0148954156666575	0.0321146927529438	-3.60825202006939	2.26014877592375	5.2248944128489	3.09529568656691	0.00309572152220173	0.00829516540479468	-2.1210987964768	-3.95309624717714	5.2248944128489	-5.27535849634005	2.32570313812226e-06	9.39971684991082e-06	4.65292125001077	-3.19772054050921	5.2248944128489	-4.34287129355073	6.12467903725216e-05	0.000150349134717795	1.53701341765777	-4.60817283809809	5.2248944128489	-3.27284370538093	0.00184698857597554	0.00713911903085802	-1.31429437153289
511	C1orf53	-15.2469048378176	3.48717593613984	-13.5008183732738	4.58183209923959e-19	9.9927109059433e-18	31.2358894931255	4.56824062026771	3.48717593613984	5.2578420484173	2.47754669021029e-06	8.42595812851512e-06	4.60000069241244	1.47436351947596	3.48717593613984	1.45030992864878	0.152675217602166	0.229621543307452	-5.30228168912724	-5.1506036671472	3.48717593613984	-3.93409808959046	0.00023733821878608	0.000898542885367946	0.459547453817657	4.77433224864695	3.48717593613984	4.73606830974973	1.58335768340782e-05	5.40636556368988e-05	2.89232694076066	9.32738642382347	3.48717593613984	9.33881712615381	6.35146806769624e-13	7.07764795070966e-12	18.8933630744492	0.253185692750712	3.48717593613984	0.113823801586835	0.909793699913898	0.942346564388727	-5.58724764636934
[truncated: 9,674 more rows]
