# Supplementary material for: Human embryoid bodies as a novel system for genomic studies of functionally diverse cell types
Source: eLife. 2022 Feb 10;11:e71361. doi: 10.7554/eLife.71361 (PMC8830892; doi:10.7554/eLife.71361)
Supplement: Supplementary file 7. [file elife-71361-supp7.csv]

	gene	Cluster0.logFC	Cluster0.AveExpr	Cluster0.t	Cluster0.P.Value	Cluster0.adj.P.Val	Cluster0.B	Cluster1.logFC	Cluster1.AveExpr	Cluster1.t	Cluster1.P.Value	Cluster1.adj.P.Val	Cluster1.B	Cluster10.logFC	Cluster10.AveExpr	Cluster10.t	Cluster10.P.Value	Cluster10.adj.P.Val	Cluster10.B	Cluster11.logFC	Cluster11.AveExpr	Cluster11.t	Cluster11.P.Value	Cluster11.adj.P.Val	Cluster11.B	Cluster12.logFC	Cluster12.AveExpr	Cluster12.t	Cluster12.P.Value	Cluster12.adj.P.Val	Cluster12.B	Cluster13.logFC	Cluster13.AveExpr	Cluster13.t	Cluster13.P.Value	Cluster13.adj.P.Val	Cluster13.B	Cluster14.logFC	Cluster14.AveExpr	Cluster14.t	Cluster14.P.Value	Cluster14.adj.P.Val	Cluster14.B	Cluster15.logFC	Cluster15.AveExpr	Cluster15.t	Cluster15.P.Value	Cluster15.adj.P.Val	Cluster15.B
1	TERF1	59.5016580223059	7.95657110997966	21.4055926711042	5.60435355964605e-55	6.41138047223509e-51	89.9302911459835	56.6425440375391	7.95657110997966	19.7686476773028	4.48803432131675e-50	1.28357781589659e-46	81.1052217399106	-38.7731029981278	7.95657110997966	-8.804400789613	4.62285776488411e-16	1.07709761365121e-14	17.5531838423355	53.2819877264873	7.95657110997966	16.3073351906039	2.48912683170599e-39	7.11890273867913e-36	59.8373557860609	-12.7280355798319	7.95657110997966	-3.07307479627364	0.00239559685417229	0.00621724773405876	-1.84505679195145	-17.0741113204395	7.95657110997966	-3.57519596056597	0.000433044121335561	0.00205988555013672	-0.941099521851036	-26.3090883627333	7.95657110997966	-5.51337771019551	1.01375834664164e-07	9.89538863957367e-07	4.39953101493788	-3.69931205881665	7.95657110997966	-0.93947530507703	0.34855172654242	0.415703894041418	-4.97551852261201
2	UGP2	47.9548010663157	7.67721526051959	19.1205576342191	4.2495435808001e-48	9.72295571287062e-45	77.1357986022627	45.9152039341177	7.67721526051959	17.8102879981882	4.76098718556563e-44	2.47571333649413e-41	69.8053435487412	-31.2369661124554	7.67721526051959	-8.36186470161368	8.05901146727075e-15	1.63466473733293e-13	15.7897886355004	40.4335067732844	7.67721526051959	13.1595219778742	2.47946761235479e-29	9.45503649511294e-27	41.647456811221	-18.6977674416702	7.67721526051959	-4.92001559458524	1.73073950264488e-06	9.06993124610966e-06	2.88325119052063	-6.01410427525562	7.67721526051959	-1.45349115614396	0.147560315195643	0.23975145658829	-4.44739818272792	-31.4386371204481	7.67721526051959	-6.81168371778931	9.71884579177846e-11	1.71051685935301e-09	7.69383946101561	-2.8649622740219	7.67721526051959	-0.812128040876425	0.417625552449742	0.484940755179156	-5.03089412658858
3	SEPHS1	42.4303835088816	7.61261114590427	18.3538770594218	9.76194065923463e-46	7.97690008154601e-43	73.1947692352654	43.0713383132191	7.61261114590427	18.2001328907532	2.92331241875564e-45	1.76014179318761e-42	71.644106652639	-27.0447895883806	7.61261114590427	-7.97851414430772	9.04930334414217e-14	1.62773632479538e-12	14.3046244828607	40.6524279819907	7.61261114590427	14.3413660126684	4.35197848818395e-33	3.55618813605889e-30	47.2450163106179	-7.54703137309363	7.61261114590427	-2.26766178718749	0.0243538735234451	0.0473340661074094	-3.39039994445734	-17.2006484535073	7.61261114590427	-4.43295409157426	1.48839357185879e-05	0.000121104000441426	1.07395755353601	-9.75631396394732	7.61261114590427	-2.61494654306046	0.00956241369355012	0.0252644743165208	-2.86663018670831	-4.18682794493077	7.61261114590427	-1.29673202403564	0.196127478746085	0.251225882527737	-4.65176836519621
4	DDX21	33.4972823872108	7.29244734596511	18.8036541934152	3.9937908124995e-47	5.71112086187428e-44	73.1910260822257	28.8592998593908	7.29244734596511	15.551383627075	6.17570609293085e-37	9.67809283604506e-35	56.0976298335556	-15.8858754823232	7.29244734596511	-6.42346294869532	8.56935090897006e-10	9.25716472130477e-09	8.12475632517165	32.5232757824512	7.29244734596511	14.6573093803334	4.29694514625252e-34	4.46882295210262e-31	46.512035940188	-4.34832517758746	7.29244734596511	-1.69413376135091	0.0917026344169106	0.147218374646289	-4.19875650290346	-14.9373211499969	7.29244734596511	-5.20483693413197	4.56203315321884e-07	5.95772366128123e-06	3.1484024987777	-10.3637848984755	7.29244734596511	-3.69654176188335	0.000278046098765776	0.00117085042433976	-0.734738881461963	-4.90080179681484	7.29244734596511	-1.95763595114867	0.0515798122713219	0.0760305440515298	-3.86143781895022
5	DNMT3B	64.2419492268311	6.79997674726461	18.8499413175217	2.87738351351537e-47	4.7024667706594e-44	72.4533016239777	68.4902346579104	6.79997674726461	19.8505218829129	2.53361533837402e-50	9.66151982366628e-47	76.4090142774383	-41.4824498245891	6.79997674726461	-7.15371896831461	1.34045483278421e-11	1.83870543010208e-10	8.69304801992168	59.0642443065023	6.79997674726461	14.4591439459456	1.83585844159742e-33	1.61555542860573e-30	46.0156953361348	-18.0983131396477	6.79997674726461	-3.34929295139465	0.000958225655807107	0.00274808260276593	-1.55723855888218	-17.821001116033	6.79997674726461	-2.8917809736087	0.0042282138239489	0.0136140630863989	-2.61535849272768	-20.6178570111512	6.79997674726461	-3.27525339229693	0.00123232073165177	0.00434311434691812	-1.99298052829995	5.68984163117532	6.79997674726461	1.17533552382023	0.241173646515841	0.301631848271697	-4.71729995267048
6	L1TD1	64.4401789883399	8.07402394598935	17.7104947692598	9.74507470700566e-44	6.10720964749665e-41	72.3598046621512	66.5368018738693	8.07402394598935	17.8001375178874	5.12062930949623e-44	2.54121437350154e-41	72.0214610607172	-22.4840501740508	8.07402394598935	-4.18470554068518	4.17671275434302e-05	0.000200762999620521	1.00634225537153	64.6507374301874	8.07402394598935	15.9292878770052	3.91057968354114e-38	8.94740631594213e-35	59.96252537771	8.60315168917311	8.07402394598935	1.68437665292914	0.093574745708608	0.149635880752932	-4.24224193835922	-30.23831880986	8.07402394598935	-4.48671849043055	1.18336860811351e-05	9.93099133800897e-05	1.13719528091738	-2.51999104548006	8.07402394598935	-0.419683128880956	0.675140270543431	0.768747356924141	-5.14968893572209	-11.1729306899667	8.07402394598935	-2.09286845396661	0.0375458024867832	0.0569962819066879	-3.65808396882623
7	TDGF1	83.9510887974335	6.60288701514887	18.5097570726145	3.2175223108964e-46	2.99045148554689e-43	70.6849128067722	87.4893929000834	6.60288701514887	19.0123246385462	9.12407918324627e-48	1.30474332320422e-44	72.3983501562359	-10.3748921077616	6.60288701514887	-1.48462777146753	0.139121961566346	0.22952916647231	-4.41128502800559	81.4082992315275	6.60288701514887	15.5301126545326	7.21458299061355e-37	1.03168536765774e-33	51.8864456827765	-15.3225890423066	6.60288701514887	-2.09800589293248	0.0370845025940756	0.0681301926571743	-3.70511889739442	-22.1693315222904	6.60288701514887	-2.48590726913108	0.0136917472235576	0.0360408624568567	-3.3200431739048	-45.9480924418776	6.60288701514887	-4.54439963006416	9.23147999066735e-06	5.71949172099519e-05	-0.208154666576892	4.91485434143311	6.60288701514887	0.741812655018091	0.459018639879846	0.525849869334286	-4.99005640429849
8	DPPA4	47.9534925626027	7.42907377882957	17.6854507850944	1.1665683173195e-43	6.67277077506756e-41	69.0894836003826	50.9114682388272	7.42907377882957	18.3915590820686	7.46324090083983e-46	5.39946659379088e-43	71.8070485743763	-40.7180994546394	7.42907377882957	-9.49737898263147	4.63564292843422e-18	1.31592444420068e-16	19.178518953895	44.0782710457495	7.42907377882957	13.5039554923297	2.00293177344094e-30	8.81289980314015e-28	43.0240000722512	-3.81882325944761	7.42907377882957	-0.952492134991604	0.341927894620757	0.438526358123482	-4.89453356163338	-14.3394310625687	7.42907377882957	-3.07569087989198	0.00237557631269038	0.00843858373268327	-2.13076424784865	-15.4804503825552	7.42907377882957	-3.35623808525172	0.0009356698086982	0.00341219719844036	-1.56080744294521	-1.45872022878328	7.42907377882957	-0.377692950643438	0.706035080943005	0.755640502010289	-5.19316475535479
9	C1QBP	27.9900372995841	9.02406251056378	16.7131037221013	1.30554506827553e-40	4.8178824455071e-38	68.9608314192944	28.3868781548713	9.02406251056378	16.4013722144947	1.2559946756549e-39	3.12360414988958e-37	66.4357934387707	-12.1869288639294	9.02406251056378	-5.75938317894453	2.92768079474978e-08	2.51257826646192e-07	7.19067258299731	16.3684148219125	9.02406251056378	7.88629031905282	1.60538299843973e-13	4.39367978520348e-12	16.853408555081	-5.68575421726843	9.02406251056378	-2.56451874215337	0.0110203667185134	0.0238593859310738	-2.79448111171934	-14.8127733748736	9.02406251056378	-6.01271321156699	7.84319257945751e-09	1.45659290761354e-07	7.51543848619588	-8.1682991905256	9.02406251056378	-3.35868422035614	0.000927844113794159	0.00338581711700325	-1.05187339022584	-13.5796201319047	9.02406251056378	-6.06508065847081	5.94576561159511e-09	2.63335495921983e-08	8.19571004365844
10	FKBP4	30.1704812963798	7.82551414584537	17.2182823187707	3.3736958961551e-42	1.48442619430825e-39	67.7288792272281	30.1237812248259	7.82551414584537	16.7928976423131	7.32032318270526e-41	2.29150493336987e-38	64.8524510828456	-9.04623855900031	7.82551414584537	-3.93588084577282	0.000112258832608764	0.000489421129971137	0.408229804779486	18.4098420477263	7.82551414584537	8.0315643177325	6.49730922443171e-14	1.89615350835456e-12	15.8038758169911	-10.2228599955991	7.82551414584537	-4.12295868648781	5.36110134137445e-05	0.000209249400700524	0.764281075217251	-13.7566181175818	7.82551414584537	-5.09129986180962	7.8126410118766e-07	9.46786156524028e-06	3.34198838482217	-17.1686701584091	7.82551414584537	-6.41411594924444	9.02154022829106e-10	1.29409571996775e-08	7.88453809629794	-8.13363563110568	7.82551414584537	-3.31813269673098	0.00106580799865855	0.0021730250409292	-1.28107982718163
11	CYCS	27.9722937390975	8.63667484355783	16.3288075671449	2.12911194462791e-39	5.79929539203412e-37	65.412069034857	30.6139733593108	8.63667484355783	17.4131738938474	8.27292578753085e-43	3.38008110747689e-40	70.5469150281908	-16.5867772255601	8.63667484355783	-7.36004958360512	3.94913098652189e-12	5.7920587802321e-11	13.5061719752887	22.377432191032	8.63667484355783	10.8136385379393	5.26887238945824e-22	5.43026127345966e-20	31.5240310632624	6.24046765829525	8.63667484355783	2.80083720262677	0.00556645351830312	0.0130652909826401	-2.31187449851801	-13.423905072633	8.63667484355783	-5.12982989649728	6.5151286479381e-07	8.12792494355637e-06	3.88209525449172	-7.85657833894208	8.63667484355783	-3.05169133720424	0.00256516761813506	0.00819936226640545	-1.86597627675055	5.92913099447299	8.63667484355783	2.72315835687263	0.00700270522422051	0.0123209701268967	-2.46958291730767
12	POLR3G	85.9525467455287	4.55819106909709	20.9338401956048	1.40656625551162e-53	8.04555898152648e-50	63.9967892036148	81.3632182189053	4.55819106909709	19.338090477327	9.1814985968168e-49	1.5005191992512e-45	57.6994894497311	-51.9598315368296	4.55819106909709	-6.87659331203483	6.70293279778508e-11	8.46374737380368e-10	3.56804862060561	75.7982253351856	4.55819106909709	15.4578615962689	1.22354490869753e-36	1.55526152838886e-33	38.2062526860785	-22.1748501972586	4.55819106909709	-3.36636264015196	0.000903674178002725	0.00260600771271771	-2.27254015304755	-29.591345469646	4.55819106909709	-3.70439080686734	0.000270085162229211	0.00138769525868282	-2.28377796816028	-4.0541003659914	4.55819106909709	-0.596605678387975	0.551404725835128	0.664521282444739	-4.82827598919583	-31.2926048221044	4.55819106909709	-4.52219560094822	1.01603494244151e-05	2.8643271911116e-05	-0.498001727720413
13	PLAAT3	67.3801996051275	6.95645145345424	16.5363335858007	4.70999611486388e-40	1.53949587297265e-37	62.0987215309164	70.4175351109396	6.95645145345424	16.9522951548582	2.3074639826177e-41	7.54211084604186e-39	63.5412441104614	-29.0746317656888	6.95645145345424	-4.45617585362186	1.34837281679513e-05	7.16792984392952e-05	1.07097838159822	58.0252034429892	6.95645145345424	12.1158747841018	4.85115733358391e-26	1.02772666474444e-23	35.8393979513726	-15.8502948945211	6.95645145345424	-2.43328435241662	0.0157879266456639	0.032643029247496	-3.2049299053388	-19.0778572553628	6.95645145345424	-2.3963089583657	0.0174261976438123	0.0437667257144913	-3.40918466145673	-49.1256833717218	6.95645145345424	-5.67669716633264	4.4629843471611e-08	4.68408632399293e-07	2.68919581047232	8.64720383484237	6.95645145345424	1.4916438512811	0.137273206658183	0.182988287598417	-4.42683618304153
14	TOMM7	28.9612313393881	9.06355978707218	15.369412211514	2.33645081366782e-36	4.81365185426682e-34	61.268301260105	31.4013542715083	9.06355978707218	16.1808041204802	6.25276007336165e-39	1.34965236300485e-36	65.2086941141998	0.239279813105732	9.06355978707218	0.106900338802646	0.914968739145252	0.944015365784784	-5.52099371485222	29.0722504914736	9.06355978707218	13.0840456572155	4.30010679842783e-29	1.53728818043795e-26	45.1209476254864	-8.76674661232114	9.06355978707218	-3.45462709704164	0.000664956201074352	0.00199138715714413	-0.729718448841483	-15.998650327899	9.06355978707218	-5.65830577555677	4.89898297751061e-08	7.76237746021072e-07	6.05603445785986	-16.0839108876291	9.06355978707218	-5.70908469084531	3.78547628217554e-08	4.02097016416789e-07	6.26141499379605	-9.30039145883516	9.06355978707218	-3.74200132252624	0.000234834814695112	0.00053135092565508	0.0803467114753893
15	UTF1	86.3005475404824	5.95198424453394	16.1160517181483	1.00212071660496e-38	2.54761355510238e-36	56.5662030257236	92.5922672158498	5.95198424453394	17.0835297097843	8.93053243230613e-42	3.29565454921233e-39	60.6005173923834	-59.396757967409	5.95198424453394	-5.70838321499376	3.79902523543819e-08	3.21158912684689e-07	2.61474218628569	74.3631169882495	5.95198424453394	11.450024251197	5.78378550329509e-24	8.37550710856909e-22	29.6985283584915	-3.73712553824464	5.95198424453394	-0.441924763556107	0.658992341296698	0.735356260674426	-5.01379708634623	-12.0205330561816	5.95198424453394	-1.11304347074536	0.266945257241899	0.381445633630692	-4.63048808015072	-37.7136922932209	5.95198424453394	-3.08379258910017	0.00231454950059698	0.00750310180981283	-2.87445421368058	18.9695773602768	5.95198424453394	2.53902690590119	0.0118305503403909	0.0198885372364544	-3.01724906244426
16	NODAL	120.564098090992	3.87860613227133	19.6828169973567	8.17904192987269e-50	3.11894132259145e-46	56.4663058728941	122.266547639833	3.87860613227133	19.6218686702722	1.25311724730682e-49	2.389276884865e-46	55.3794670372637	46.5982128852488	3.87860613227133	5.75987940664822	2.92024600507247e-08	2.50807915150368e-07	3.21316500874639	94.5698820577483	3.87860613227133	12.9569250688643	1.08620013933296e-28	3.55032274113402e-26	27.6844854882264	-44.7104730690386	3.87860613227133	-3.86218034426653	0.000149118545019872	0.000520255003058049	-2.19251020865031	-77.2630689185237	3.87860613227133	-5.1330656782408	6.41622581452833e-07	8.03081217923459e-06	-1.64764540106109	-79.3364509356461	3.87860613227133	-5.1458892243489	6.03840534088367e-07	4.87504284401618e-06	-1.73839308322951	-49.5252065403529	3.87860613227133	-4.25046933692027	3.19169643340316e-05	8.33059712483051e-05	-1.69557720547358
17	CD9	58.7799905964019	6.97647382766546	15.2911152588635	4.14312836788398e-36	7.88253653581762e-34	55.6026071987661	59.902565837015	6.97647382766546	15.2903815099751	4.1654321170971e-36	5.95656792744886e-34	55.0823917357242	-27.0265860523563	6.97647382766546	-4.82710292478759	2.64248051480846e-06	1.62614185526674e-05	2.44802716678256	47.0903261892423	6.97647382766546	9.86954465651593	3.70220928851149e-19	2.61439964571429e-17	23.9225669572014	-28.2987074651961	6.97647382766546	-4.64512670531221	5.94959023020724e-06	2.83243080455975e-05	1.589763260254	-24.8548476061402	6.97647382766546	-3.55833251955822	0.000460129244679294	0.00216531409260844	-1.39412185457772	-50.0597226269733	6.97647382766546	-6.43929529585231	7.85367400343411e-10	1.14374923616941e-08	4.99123615593832	-12.0040699414398	6.97647382766546	-2.05761249248815	0.0408460723820557	0.061605678055467	-3.73640762784221
18	FRAT2	54.1731282998962	5.49151808599056	17.0163090404923	1.45204360564048e-41	5.93263530304538e-39	55.4013843639525	51.2294682693301	5.49151808599056	15.6173672434541	3.81298078651958e-37	6.14373242222309e-35	48.5075327649618	-11.631891020246	5.49151808599056	-2.57908502881491	0.0105800440238478	0.0264732510133026	-3.08893297435387	48.6558728236503	5.49151808599056	12.5016328663279	2.97507770489065e-27	7.5633086542109e-25	30.4782516225787	-7.67744756151067	5.49151808599056	-1.49942469622857	0.135245310384394	0.204602796984589	-4.37820075493151	-30.9238552135731	5.49151808599056	-5.16622826449835	5.48303813486239e-07	6.96370826287251e-06	0.73520013318841	-13.9140976562063	5.49151808599056	-2.54929147966266	0.0114981317611836	0.0293744143251319	-3.33003973780321	7.14391486113293	5.49151808599056	1.59735847741921	0.111669407928185	0.152225413320387	-4.29050880307076
19	MARCKS	-73.8117678866158	8.57839567527586	-16.3855499672456	1.40914318033468e-39	3.93185316659238e-37	54.8559273842396	-82.9533217850032	8.57839567527586	-16.2960140851711	2.70286138798873e-39	6.31035393440635e-37	49.8948040835201	-1.04264230546544	8.57839567527586	-0.293081273602903	0.769745580931998	0.839155146344603	-5.48843796545251	-17.9828662537848	8.57839567527586	-3.94579696747777	0.000108017336441276	0.000389693575808326	0.42119734680781	33.0512928468688	8.57839567527586	9.07406268340266	7.84496591519492e-17	1.58843203663416e-15	22.960678148359	32.6334851673984	8.57839567527586	9.60593462895314	2.22616793249429e-18	1.54347643319604e-16	26.4672362175643	27.14226374313	8.57839567527586	7.65824813650452	6.52634538064285e-13	1.66654890969987e-11	16.0288480456672	40.8068631416553	8.57839567527586	12.1892222354014	2.85625734085517e-26	5.98453919036321e-25	41.0373799754187
20	IFITM1	62.8697373257188	5.68564334899996	16.0345110828353	1.81553052106613e-38	4.51514546978186e-36	54.3239122761715	64.0318408288519	5.68564334899996	15.9243875494601	4.05289628196488e-38	7.4782473331739e-36	52.9673361139872	-19.908250432342	5.68564334899996	-3.18225048598382	0.00167990006527401	0.00545347807796103	-2.15678208532189	61.0651441840634	5.68564334899996	12.764828621825	4.39769748270243e-28	1.28999126159271e-25	33.9036109063162	-54.6992120752735	5.68564334899996	-7.59446463038073	9.62331460142114e-13	1.28610653084413e-11	7.48074251664777	15.7733880358092	5.68564334899996	2.64496687133756	0.00877908339778389	0.0249708389036916	-2.9749264931622	-63.0790339940886	5.68564334899996	-7.59484010574405	9.60138959885102e-13	2.34200206846174e-11	5.74690455064416	-4.24420483343141	5.68564334899996	-0.705054865214918	0.481546948821317	0.546680271362098	-4.9069623697427
21	SKIL	35.8646874761512	6.70629956008549	15.3164340485051	3.44251135190575e-36	6.67497116369522e-34	53.2427123706937	31.394817723892	6.70629956008549	12.9401308673694	1.22756736570926e-28	5.55073939277233e-27	40.607743007555	-8.00703618276587	6.70629956008549	-2.56345293739955	0.0110532196246415	0.0275068158594514	-2.93294761923203	38.2830411756529	6.70629956008549	13.4641212015135	2.68007504960395e-30	1.13555772472108e-27	39.01803935311	-5.53372490013867	6.70629956008549	-1.58584370915366	0.114259357106114	0.1775023146787	-4.3054622386241	-5.1662186397529	6.70629956008549	-1.39215979661252	0.165326920779794	0.262285393665351	-4.47982296002375	-19.990195399857	6.70629956008549	-5.12920541419267	6.53438576185567e-07	5.23483005011407e-06	2.23568896041625	10.0938121903741	6.70629956008549	3.23293732357958	0.0014200998745669	0.00282636439892926	-1.63714850762605
22	TKT	22.0520609205134	9.2779275822845	13.8969042217382	1.12935943904401e-31	1.03358975861307e-29	53.0078704162778	22.5236600143679	9.2779275822845	13.7136858441406	4.31869725966446e-31	2.82319409431779e-29	51.3534404831913	-13.5363585977037	9.2779275822845	-6.96792977205557	3.95985271286425e-11	5.09318497052745e-10	12.6482623845195	18.878775930203	9.2779275822845	9.92354945023548	2.55811912237947e-19	1.85220776962159e-17	27.7954940741965	-3.26789245103512	9.2779275822845	-1.6009626054653	0.110868407310515	0.17291541644612	-4.41569200709572	-15.2601168975067	9.2779275822845	-6.51431636815903	5.18568800213975e-10	1.24630820891762e-08	9.57824817685496	-5.38095503966062	9.2779275822845	-2.47303553241664	0.0141802221267997	0.0350944096187431	-2.97931971736677	-11.6082445201655	9.2779275822845	-5.56054825559263	8.01236034001431e-08	3.09876275489397e-07	6.30174760838891
23	CIRBP	-37.5775074539916	8.09255558786962	-15.4973689161166	9.16576667325611e-37	1.94178464337129e-34	52.7925550093451	-40.3656259609969	8.09255558786962	-15.7252742157542	1.73352693336916e-37	2.91640413496224e-35	51.9763588074556	7.45761432100055	8.09255558786962	3.45026048768593	0.000675221333879891	0.00243829926123294	-0.683377419717048	-6.38171643596128	8.09255558786962	-2.36072641629361	0.0191426797483622	0.0374409738966085	-3.21974827832759	20.1778241480786	8.09255558786962	8.51584839866891	3.0039992269904e-15	5.1368835809821e-14	18.8700913046144	20.8904504689331	8.09255558786962	8.91963299501986	2.17251856489881e-16	1.23037685061596e-14	20.9412317664112	8.62574135087573	8.09255558786962	3.38337590815842	0.000852198417706397	0.00314996765704723	-1.02773735949394	23.5533278943933	8.09255558786962	10.3940217321105	9.93126989523517e-21	1.39746282412657e-19	28.760751263541
24	NOP16	43.8375017208523	5.32199086508716	16.4979865580201	6.22309619235394e-40	1.87347948527708e-37	52.0803625068512	43.9929246362112	5.32199086508716	16.1029143903814	1.10278692925829e-38	2.33627453161386e-36	49.4275905868815	-12.2836785801129	5.32199086508716	-3.21703177299202	0.00149730737089656	0.0049151208961425	-2.11695939968714	36.7070891082223	5.32199086508716	11.0705404051507	8.5914960648273e-23	9.92795100824488e-21	23.6784729976212	-11.3695968459235	5.32199086508716	-2.77768195130943	0.00596372863456827	0.0138781642757244	-2.93066051227967	-28.4317568914026	5.32199086508716	-5.79830594978814	2.39723745804095e-08	4.08101138690305e-07	1.95189075579092	-4.60018466942668	5.32199086508716	-1.04884814737121	0.295437545399754	0.415976063922854	-4.67131773768388	-23.161955022304	5.32199086508716	-5.5295892050948	9.35163225053531e-08	3.57442943354908e-07	2.44092176007946
25	SNRPN	27.7354404024222	7.935726896967	14.1473187316345	1.80389089766914e-32	1.77900964390819e-30	51.4202871084698	28.4309507285855	7.935726896967	14.1852373508303	1.3663152680084e-32	1.1007497652124e-30	51.1470963075735	-13.4516943970744	7.935726896967	-5.10950662247288	7.17100320164251e-07	4.91529518434933e-06	3.98073019388392	32.3576733285916	7.935726896967	13.910890701635	1.01941352949536e-31	6.1379425144352e-29	46.1936468789709	-3.32940601116997	7.935726896967	-1.2284142145921	0.220648122699629	0.307680951204748	-4.723793264453	-5.12316840749804	7.935726896967	-1.75823718869384	0.0801444851931064	0.148502253095098	-4.12456110693308	-25.855802280409	7.935726896967	-8.10493060081359	4.10164549142631e-14	1.2579845689522e-12	13.6820088968273	12.0812825025646	7.935726896967	4.77989672995636	3.26890650467224e-06	9.96171827742421e-06	3.02224979600872
26	RSL1D1	19.6071026257098	7.86607154457086	14.1782863616681	1.43770525819755e-32	1.43020418728522e-30	51.2352607194619	12.4858348334682	7.86607154457086	8.5347645174459	2.65948643989796e-15	2.12313502250053e-14	20.0412405031368	-8.52535553359099	7.86607154457086	-4.88770479640359	2.00646522982154e-06	1.26328906049304e-05	3.39792994722341	21.0088781550511	7.86607154457086	12.1170257851587	4.81101989913454e-26	1.02772666474444e-23	35.6581893799322	-4.21790863426871	7.86607154457086	-2.18978692546934	0.0296263853770872	0.0560393268376121	-3.50998294526612	-8.23178267414264	7.86607154457086	-4.13254033069302	5.15834174086709e-05	0.000344290720627301	0.705441333000132	1.00630178697212	7.86607154457086	0.517974650509206	0.605013953615825	0.711488448742294	-5.16709760216868	-11.3914472733154	7.86607154457086	-5.96917269523508	9.86228396856918e-09	4.26719094555338e-08	6.81334925662191
27	USO1	31.2944186276826	6.45443799591878	15.2244077834729	6.75045190878231e-36	1.24556725542693e-33	51.2134482721663	29.7272726031999	6.45443799591878	14.015007112551	4.75526618099493e-32	3.53248344873909e-30	44.6008126232553	-11.1914558332925	6.45443799591878	-4.13270260135311	5.15497174219926e-05	0.000242786647718236	0.391296430107176	33.9754167794278	6.45443799591878	13.5569899435752	1.35904617090826e-30	6.21899527807618e-28	37.7846476858447	-8.82984948250075	6.45443799591878	-2.94231543575267	0.0036185810753959	0.00895641875866056	-2.40910901076165	-10.9259810487069	6.45443799591878	-3.3108327032995	0.00109258880180689	0.00447359194440618	-1.90170128852157	-16.3632923653329	6.45443799591878	-4.84339454210173	2.45455136716972e-06	1.74302095843709e-05	1.30732032942693	-2.3637462807038	6.45443799591878	-0.843369562750677	0.399968615291836	0.467235878580476	-4.90711416091712
28	GAL	78.9487479790696	6.54471299333065	14.4512615535257	1.94503059172093e-33	2.24759090598863e-31	50.6978850419712	77.2876278803662	6.54471299333065	13.7775402605101	2.70629740065137e-31	1.83195516351785e-29	46.5818860432109	-12.7025263042732	6.54471299333065	-1.47962045263044	0.140453167470865	0.231210546555784	-4.41229752374022	75.4595027058494	6.54471299333065	11.6857249187502	1.07125109937811e-24	1.75073036812652e-22	33.0347910010819	-20.9986112306611	6.54471299333065	-2.37223291876046	0.0185719978081302	0.0374847662182444	-3.32519950191701	-32.6863856970455	6.54471299333065	-2.84481477036165	0.00487746924142636	0.0153617663989603	-2.91752413124058	-64.0288572628676	6.54471299333065	-4.98392125404845	1.28929098453326e-06	9.76787341924536e-06	0.367809575144951	-5.49588885956813	6.54471299333065	-0.672336197327759	0.502098916202742	0.567702273310869	-5.00813265326614
29	HP1BP3	-44.4967444059954	6.56166586654482	-17.2835053671289	2.10706243846644e-42	1.00436642900234e-39	50.5839735463255	-28.4399965172624	6.56166586654482	-11.0322344648973	1.1267285558241e-22	2.30174547832637e-21	26.0018069560495	4.34866528966632	6.56166586654482	1.85006672443522	0.0656900886818838	0.124111414454294	-4.00776299278662	-10.1120949674629	6.56166586654482	-3.4510567252903	0.000673338527599617	0.00197259737662986	-1.42258272533352	18.9733153464584	6.56166586654482	7.20774030390178	9.75267065556588e-12	1.14784518826825e-10	10.2946373694877	13.8766067126145	6.56166586654482	5.34714917444223	2.29693761828078e-07	3.20450809184538e-06	3.96649792470098	20.869454210972	6.56166586654482	8.37741365261953	7.2974816969293e-15	2.49949672493626e-13	15.4859481387071	15.7798081332942	6.56166586654482	6.22813604932726	2.48495964913322e-09	1.15092867959854e-08	7.05861571776818
30	DDX17	-25.2165557126667	7.9014588467306	-14.8153793274366	1.34947867379741e-34	1.95418177572688e-32	50.3923125669407	-19.172821015748	7.9014588467306	-11.1181712854278	6.13069739202517e-23	1.2845270726148e-21	31.6309471494284	3.96250480062944	7.9014588467306	2.36651633196216	0.0188536189621496	0.043214866945901	-3.18249598679197	-0.773953810193628	7.9014588467306	-0.393610346604513	0.694262764138392	0.761419424958605	-5.23140677112592	7.94421050468512	7.9014588467306	4.18549867901824	4.16326461397148e-05	0.000166588832402357	1.08127589558449	10.5676063451433	7.9014588467306	5.60003223136043	6.57316189788931e-08	1.01480394213028e-06	5.74830344084902	6.61037359863164	7.9014588467306	3.41532901321955	0.000762842562590336	0.00286316237402672	-1.01362917055704	9.80340494197182	7.9014588467306	5.45421946917587	1.35900046144939e-07	5.09402532076706e-07	5.43233982257268
31	MT1X	71.8980028800165	6.63241292993906	14.3908507022798	3.02827333280367e-33	3.29937589783562e-31	50.2385590724114	74.8668957172363	6.63241292993906	14.7643819312842	1.96079912374564e-34	2.05793963079359e-32	51.7633890765075	-51.5687913186461	6.63241292993906	-5.65141542056854	5.07281319766061e-08	4.19313460847091e-07	3.42501031237268	68.9657146949698	6.63241292993906	11.9460715718146	1.65003094691127e-25	3.04457323107499e-23	34.638277206115	-6.62044552719357	6.63241292993906	-0.850256183020204	0.396138140360466	0.493590918934181	-4.89253436760242	-19.028335216277	6.63241292993906	-1.95748872098434	0.0515972237232824	0.10493728700344	-3.94786857806194	-35.8432780808454	6.63241292993906	-3.3027940469105	0.00112280380054937	0.00400151884058716	-2.31631040294282	10.7894315916905	6.63241292993906	1.52748162874438	0.128126017131457	0.17205794529685	-4.38238577873979
32	H1FX	-39.1645653491387	8.47673724747822	-14.4864955416612	1.50240667297827e-33	1.77191055039911e-31	49.5707588267244	-36.4704355689818	8.47673724747822	-12.7970032211316	3.47999002604919e-28	1.47996601851311e-26	39.8425839794385	4.3567757445466	8.47673724747822	1.79369239063451	0.0742818111563283	0.137438770763124	-4.16672811041315	-10.1101493844425	8.47673724747822	-3.28509419371631	0.00119209527152944	0.0032790502299343	-1.29143343037952	17.473111866152	8.47673724747822	6.73360123309656	1.51524459494573e-10	1.52725975032416e-09	11.2160739149039	15.9002561776347	8.47673724747822	6.21755842892065	2.63085120004998e-09	5.4131182965057e-08	9.05588373362444	19.9172998253369	8.47673724747822	7.63282129026296	7.6206877858031e-13	1.92027903677505e-11	15.2897357087586	20.4890930037866	8.47673724747822	8.11535741622671	3.84142284495625e-14	3.03729429639075e-13	17.8660513848323
33	JARID2	31.6532035081757	6.78539974978855	14.426288815873	2.33564574543087e-33	2.61958699291462e-31	49.0880408386623	36.8221599195062	6.78539974978855	16.601621971849	2.93169748306455e-40	7.98538552529964e-38	59.2740060867964	-20.1890819800662	6.78539974978855	-6.65447371231484	2.36890164778803e-10	2.78236497440402e-09	8.29485880955605	37.5276761566028	6.78539974978855	13.9895882234041	5.72842621938721e-32	3.64073310832165e-29	41.3526936141304	5.28590428641784	6.78539974978855	1.75589191380138	0.0805452770879175	0.132251505210381	-4.12211248785293	-8.16424323657533	6.78539974978855	-2.3180352912142	0.0213971073173315	0.0516964958205433	-3.4340082224629	-25.4193357355203	6.78539974978855	-6.93378914238728	4.82316233831547e-11	8.84246428691169e-10	7.49309318338469	6.9690251469873	6.78539974978855	2.38913152263628	0.017761066039609	0.0289027874101177	-3.21958890137252
34	C9orf135	92.5368584264164	3.71815895003948	18.5020748527377	3.3982403244851e-46	2.99045148554689e-43	49.0243970697337	96.0478266558653	3.71815895003948	18.9233469111562	1.71148364660592e-47	2.17548587968575e-44	49.4907678604727	-26.2821064614334	3.71815895003948	-2.8900266285636	0.00425097189743244	0.0121974212457053	-3.37487150912397	81.651664342452	3.71815895003948	14.1736400866201	1.48749252028545e-32	1.1344609621377e-29	30.1397446290589	-45.8475643265997	3.71815895003948	-4.74295678285158	3.85687278176566e-06	1.90924381754215e-05	-1.40191415238776	-25.9770322586488	3.71815895003948	-2.48335456684291	0.0137874138481613	0.0362093697022419	-3.88303445351944	-58.4552103933828	3.71815895003948	-5.18204853102499	5.08566763026846e-07	4.17360385152591e-06	-1.55475032739487	15.5537471570963	3.71815895003948	2.13884631390794	0.0335872628902922	0.0515341050784526	-3.86134301139945
35	UQCRH	16.9444304384601	10.0664442941464	12.8599125324721	2.20163502697752e-28	1.31180753690744e-26	47.9639427109371	16.86236225158	10.0664442941464	12.2851539538239	1.42748776150065e-26	4.76106705293512e-25	43.9677111036203	-6.48090815740806	10.0664442941464	-4.36518876616434	1.98138363184189e-05	0.000101828520881721	2.37189846926377	19.0570703347266	10.0664442941464	12.7555441079167	4.70491354954601e-28	1.34560527517016e-25	45.6063684828614	-4.52788171037692	10.0664442941464	-2.77940414540746	0.0059333182239035	0.0138213196511608	-2.30834900202472	-12.8529107928933	10.0664442941464	-7.10798816966198	1.75272383365804e-11	5.3469761752128e-10	13.110769649146	-3.54887650912874	10.0664442941464	-2.04287401554911	0.0422974045984611	0.0875623019992523	-3.77349978312579	-7.99984948278972	10.0664442941464	-4.91211933112261	1.79452533980748e-06	5.68365722242457e-06	4.21579138554437
36	SOCS1	66.01255272658	4.52418394055618	16.4830768019151	6.93516955778865e-40	1.98345849352755e-37	47.8503169790341	74.5622802131335	4.52418394055618	18.4626347858159	4.49917086953935e-46	3.95927036519462e-43	54.3898236848028	-26.3783548524277	4.52418394055618	-4.0324942737369	7.68919359321652e-05	0.000347410642600304	-1.32928757231403	58.6867308419266	4.52418394055618	12.0129801900227	1.01897429571479e-25	1.97577388864021e-23	25.0668662324156	-31.2836407841923	4.52418394055618	-4.43044290657719	1.50434603800708e-05	6.59376194436821e-05	-0.957198036805288	-37.0293139170786	4.52418394055618	-4.44846026391967	1.39342952360984e-05	0.000114025992489961	-1.59618978177351	-42.0099940824693	4.52418394055618	-5.27397728662459	3.27405072820813e-07	2.84829964492022e-06	-0.174686778005569	-35.5413435407675	4.52418394055618	-5.19159822117449	4.85949027706337e-07	1.67245995095081e-06	0.550296033278649
37	KRTCAP3	70.3679671706771	3.93226584857779	17.91578989059	2.23459016793788e-44	1.50374773654173e-41	47.7758766582131	73.7643271294261	3.93226584857779	18.578649633416	1.97150953422717e-46	2.05036991559626e-43	49.2240044044894	46.0963756531171	3.93226584857779	9.84893904771838	4.26220187145115e-19	1.3735095608282e-17	15.8275214052827	61.3821641197277	3.93226584857779	13.0232555952442	6.69845472370653e-29	2.25383300115302e-26	25.6548528576963	-73.8807367156093	3.93226584857779	-8.73113273827705	7.45501810060358e-16	1.35373662017309e-14	3.58861290065394	-61.1494646797236	3.93226584857779	-6.94194362459216	4.60146783578359e-11	1.31601980103411e-09	0.691005349928315	-69.9963186654051	3.93226584857779	-8.29778538337787	1.21208283082661e-14	4.0075802267793e-13	2.98986305787491	-80.9652047972402	3.93226584857779	-8.58897121639103	1.87455797517544e-15	1.66111101750635e-14	2.1720089244388
38	ETV4	60.0119363584794	4.81108150244003	15.8776454603769	5.69991179623625e-38	1.33075491732536e-35	47.6740556283492	64.0090054100921	4.81108150244003	16.5931253522018	3.11823592122475e-40	8.29595789274679e-38	49.635240802542	-1.03112851671469	4.81108150244003	-0.185554273242826	0.852971027276271	0.898546090696981	-4.97737920779198	53.6285754340978	4.81108150244003	11.3929600838938	8.68997398756853e-24	1.22732472120721e-21	23.7297978691209	-85.0725167329973	4.81108150244003	-11.1114699977496	6.42893612532839e-23	2.16952888713147e-21	11.457901175839	-6.64644155210002	4.81108150244003	-1.04790013282112	0.295873134092229	0.411874988320164	-4.65715631507309	-69.7286032544535	4.81108150244003	-8.38304436293218	7.03967629763245e-15	2.4257197844854e-13	4.81201077922291	-43.5750026960869	4.81108150244003	-6.37496086195716	1.1184324079034e-09	5.43768242516569e-09	2.93652983164447
39	GDF3	123.670022213004	3.15017231650884	18.8860439711797	2.2284434427843e-47	4.24889883090874e-44	47.2349954804538	129.467552957197	3.15017231650884	19.6806196458628	8.30576557706601e-50	1.9003591640327e-46	49.0643620577259	-18.4571823739302	3.15017231650884	-1.47013972595713	0.143000635584966	0.234878287306822	-4.44856488339213	105.502673810643	3.15017231650884	14.0585918187746	3.45554493560591e-32	2.32537847431362e-29	28.0165665246991	-36.1538396226322	3.15017231650884	-2.88738572921321	0.00428544173434634	0.0103823493098099	-3.53546816445411	-69.2920508522681	3.15017231650884	-4.39201523588357	1.76991646751071e-05	0.000140317701928777	-2.76498506666869	-64.1597938909507	3.15017231650884	-4.31391509911284	2.45484466738985e-05	0.000136858786525048	-2.66036968513011	-75.4141210664753	3.15017231650884	-5.25149653161622	3.64819645165986e-07	1.28377014478588e-06	-1.60939555294335
40	MRS2	40.2157002438226	6.3897681906255	14.222107687788	1.04284931993608e-32	1.05576957699724e-30	46.9459540364506	40.3059698666948	6.3897681906255	13.8755696588582	1.32032260257184e-31	9.26655863400115e-30	44.548387603496	6.47365989709553	6.3897681906255	1.76062233194326	0.0797385552593448	0.145487890297752	-4.11682458854611	34.7253656447829	6.3897681906255	9.63853391748485	1.78496941164322e-18	1.11584973055729e-16	20.5319165160637	-4.57741239068756	6.3897681906255	-1.11688294521062	0.265303619260941	0.357193527638598	-4.71245187763664	-5.58165334643371	6.3897681906255	-1.23528587576097	0.218085955519454	0.326003309962441	-4.59658526830743	-21.8095968299903	6.3897681906255	-4.53399575018447	9.65605537265972e-06	5.955001264864e-05	0.504385397882686	0.927196866959406	6.3897681906255	0.238357015795535	0.8118335300292	0.847465606673423	-5.13197576704238
41	CCNI	-27.3781579639076	9.24734988716653	-13.2184811700983	1.61242164310383e-29	1.13864837019184e-27	46.9380100452485	-25.7738847586863	9.24734988716653	-12.0012398730922	1.10894243037684e-25	3.27811405775479e-24	39.501755921339	3.57393603302007	9.24734988716653	1.78149053416135	0.0762582926769542	0.140341938895594	-4.23606033543504	-4.67628872578143	9.24734988716653	-1.93844330368052	0.0538916780542787	0.0912417932427036	-3.92077729002652	27.4406646002528	9.24734988716653	12.9699812197824	9.87634340845823e-29	4.61164769766376e-27	45.1617128152871	8.83106368358961	9.24734988716653	3.88653924133048	0.00013582301430833	0.000779991977843372	0.59979388135018	8.08437908708192	9.24734988716653	3.54414725579767	0.00048413744763424	0.00191843865636845	-0.397755216059457	23.7916008388568	9.24734988716653	11.5199321425887	3.51029506478432e-24	6.43554095210458e-23	37.3765433475113
42	CD3EAP	50.1274876056704	4.61969679368089	16.2996641344381	2.63201667393367e-39	7.00238854646539e-37	46.4518786807681	39.3259322723643	4.61969679368089	12.0853476883469	6.04674342376223e-26	1.87465432975176e-24	28.6097040093473	-5.39724609391452	4.61969679368089	-1.22204577806887	0.223042001715515	0.332499413555576	-4.57368418340135	32.6453384876418	4.61969679368089	8.19119062670228	2.38185202827514e-14	7.78525348670504e-13	10.6833461394744	-24.8722592969594	4.61969679368089	-4.90728623413991	1.83468303937605e-06	9.58829327111103e-06	0.114103837428712	-25.7129248242334	4.61969679368089	-4.54892976478552	9.05227448315505e-06	7.94766078950835e-05	-1.01901818707322	-0.31517945797934	4.61969679368089	-0.0651349060595983	0.948127725785473	0.964912479582405	-4.91463135545257	-53.145717327446	4.61969679368089	-9.92380829339431	2.55358643817887e-19	3.23869499476344e-18	10.4941349709204
43	CYP2S1	87.7576789997444	3.58629466099175	17.5951805204398	2.23197244070785e-43	1.21589355817609e-40	46.384919643029	85.1141080951773	3.58629466099175	16.7875136450776	7.61164226119361e-41	2.29150493336987e-38	43.1478366398574	-40.6888527766282	3.58629466099175	-4.44986368470694	1.38512778876395e-05	7.34965765466587e-05	-1.56905573780388	80.7331200707067	3.58629466099175	13.8704375798894	1.37088304443624e-31	7.46804858492884e-29	28.8311472480272	-87.9900168835087	3.58629466099175	-7.37354520018221	3.64325510673037e-12	4.55506430830551e-11	0.641629773939358	-60.411650126749	3.58629466099175	-5.18329259962376	5.05563371909907e-07	6.54258481295174e-06	-1.7040527979404	-97.3410856087963	3.58629466099175	-6.67842611326043	2.0699072159272e-10	3.37318212965914e-09	-1.39132212596028	-30.1155525462423	3.58629466099175	-3.24784667782029	0.00135109980885194	0.00269760132715439	-3.05234127715048
44	MAL2	68.8641602550412	4.31595777583773	16.6562495211056	1.97207442160695e-40	6.83652466157077e-38	46.3537108411116	63.1374230181634	4.31595777583773	14.8386797397508	1.13770990490859e-34	1.27601973648571e-32	38.8155660385007	60.585145029279	4.31595777583773	12.9822381825927	9.03248788918314e-29	6.6665588033713e-27	29.1852127898299	62.0217282634806	4.31595777583773	12.0053605220772	1.07649644694161e-25	2.05251989216868e-23	23.0327184868039	-78.7694496401966	4.31595777583773	-8.90352447941748	2.41501305407394e-16	4.66684955044018e-15	4.69754512593225	-22.5723690889498	4.31595777583773	-2.75389082831038	0.00639855099049379	0.0192326388153571	-3.52584955639631	-88.4845571132994	4.31595777583773	-9.24764539004302	2.47501227700226e-17	1.34190239094341e-15	4.18550038962168	-32.2296620237325	4.31595777583773	-4.53572346224389	9.58427099173575e-06	2.71127745166807e-05	-0.892048476926414
45	EPCAM	55.4990457246344	7.22860457390296	13.3944687418685	4.45905181933966e-30	3.33408841916639e-28	46.235166499608	50.8587150703485	7.22860457390296	11.9180963785758	2.01813970722395e-25	5.78634542622606e-24	37.7305823327109	67.8900857556469	7.22860457390296	15.7270416872008	1.71129500229525e-37	2.68181025017228e-35	57.4233538270079	44.3180876632275	7.22860457390296	8.76206278945919	6.09439794688486e-16	2.5538429491708e-14	19.3265364960922	-27.1929370571889	7.22860457390296	-4.10824774053089	5.68727038612401e-05	0.000220550417685623	0.253915099356977	-28.9384033384479	7.22860457390296	-3.50556431145963	0.000555525697836987	0.00254553585789386	-1.65092217164412	-59.1606765162346	7.22860457390296	-6.54090343587699	4.4730861310691e-10	6.83205678764093e-09	4.80974533192748	-6.03809547973605	7.22860457390296	-0.995970712091238	0.320395341121157	0.385620484211051	-4.85945689915048
46	MCM5	36.6377581727679	5.80208717870938	14.7117896509605	2.88261812005502e-34	3.87966485805052e-32	46.0892261684318	10.1725031735749	5.80208717870938	3.60234747691461	0.000392562282175589	0.000771634451561639	-0.770695644871734	-8.23374200023026	5.80208717870938	-2.46118624036383	0.0146435214825999	0.0348571304489669	-3.20670771732468	13.4904573365976	5.80208717870938	4.04928380684924	7.19468918059392e-05	0.000271104229993394	-0.12897902082527	-13.9451600853538	5.80208717870938	-3.68646603977815	0.000288590294430194	0.000937652078466748	-1.27133357754093	-3.7588574251339	5.80208717870938	-0.967529645459036	0.334377460028091	0.453070963250191	-4.74395861979254	12.0673415229219	5.80208717870938	3.48700825602287	0.000593271502808681	0.00228981983540193	-1.44813629654097	-38.3059797940975	5.80208717870938	-9.6315240477764	1.87183841172305e-18	2.16605910795841e-17	14.5250377269835
47	MYC	76.0408826777259	3.98156479787358	17.1268479957264	6.52996183708544e-42	2.76676901541694e-39	45.870293827374	82.5415447740136	3.98156479787358	18.3951784755507	7.27327509576386e-46	5.39946659379088e-43	49.298793476653	-64.2934920117825	3.98156479787358	-7.98532013579896	8.67327707034134e-14	1.56502034203005e-12	4.59075970377574	64.385232120232	3.98156479787358	12.0332368160821	8.80536536365054e-26	1.73678240965797e-23	22.8228846122081	-15.0408752571848	3.98156479787358	-1.99454523088113	0.0473684073422029	0.0840407227039083	-4.06697365939917	-47.6047925226742	3.98156479787358	-5.24662649291178	3.73456125004591e-07	4.97361824220317e-06	-0.890365451973845	-50.3504173419752	3.98156479787358	-5.68436974131161	4.29250716597093e-08	4.52592460633249e-07	-0.144842248434696	-56.974007876425	3.98156479787358	-6.67965258656593	2.05563975528405e-10	1.08671528652724e-09	1.67646195227435
48	CEBPZ	29.5675097660022	7.05578637858329	13.5644801508015	1.2865974705232e-30	1.06657065672358e-28	45.8246235852331	25.5077876959512	7.05578637858329	11.2234153807463	2.90485515396721e-23	6.37841515573606e-22	32.8393040678597	-20.6329997790443	7.05578637858329	-6.64313671402312	2.52485382060685e-10	2.95039098138328e-09	8.38529394960925	30.7272540181346	7.05578637858329	11.3403470641148	1.26431427291667e-23	1.74262111833334e-21	30.1459294034048	-6.04052895229176	7.05578637858329	-1.89705159770976	0.0591750565614839	0.101783588492464	-3.94825003203207	-11.4472624408635	7.05578637858329	-3.21701710421253	0.00149738033890166	0.00580089098443445	-1.90869989064286	-2.39687267150444	7.05578637858329	-0.729576277997473	0.46645138239712	0.588114278855522	-4.97039724702838	-4.11293411428602	7.05578637858329	-1.34913605582965	0.178726775785809	0.231110468519234	-4.56214161984348
49	FOXH1	64.3480024972218	6.32884212973339	13.7576174454002	3.13119509198755e-31	2.77681177149904e-29	45.6266998490936	69.8250019273405	6.32884212973339	14.769356792819	1.89061542965899e-34	2.00265189956471e-32	50.3714677945625	11.6868651684934	6.32884212973339	1.82710454351019	0.0690845281321318	0.12937092843863	-4.03532567707733	64.1183716816016	6.32884212973339	11.4568240374038	5.50973448297662e-24	8.08094390836571e-22	30.4295675765873	-25.9650569193203	6.32884212973339	-3.50143768304168	0.000563719771862924	0.00171864171463868	-1.38835381589773	-28.8418618359618	6.32884212973339	-3.19078866711124	0.00163325847658821	0.00619922925420343	-2.36427378026615	-57.1046152312883	6.32884212973339	-5.59828752090253	6.63105632937075e-08	6.69543551703454e-07	1.69924973425055	1.24872864805319	6.32884212973339	0.183044890763587	0.854937042739746	0.884601551763502	-5.12638945272733
50	SSB	18.7407364729255	8.94087427958399	12.7541737379343	4.75203809032275e-28	2.66486841927903e-26	45.6005174076423	16.3835015657169	8.94087427958399	10.7652215954229	7.40632224304297e-22	1.3301150150771e-20	33.6214865727762	-8.46268183222077	8.94087427958399	-4.74583010564113	3.80769883188846e-06	2.26521448969339e-05	3.38004545552839	9.9120191220372	8.94087427958399	5.3821723246163	1.9361589584058e-07	1.39218469416483e-06	5.62938830613036	-5.96417459857685	8.94087427958399	-3.07894780428593	0.00235086709146037	0.00611642472738382	-1.67346619866543	-4.23184132655743	8.94087427958399	-2.08758995190275	0.0380248817260332	0.0822159604887203	-3.66760282269068	-2.04052252801904	8.94087427958399	-1.01203455187587	0.312670651365186	0.434649145145744	-4.97826528308607	-5.4591763321344	8.94087427958399	-2.87649019792732	0.00443036893036582	0.00806547112720958	-2.12960592653315
51	ZNF428	-58.0345873027475	6.78521988214245	-16.4911139256757	6.54174678457618e-40	1.91891239014235e-37	45.5422144345101	-68.1741078290592	6.78521988214245	-17.2613614862037	2.47211104944636e-42	9.42698346855544e-40	42.9587919857756	9.25015188519426	6.78521988214245	3.24377815644497	0.00136961318188498	0.00454682959975746	-1.41617804010377	-20.6184240955248	6.78521988214245	-5.43793485971604	1.47261667433887e-07	1.08548548675494e-06	3.57872909088592	27.2631467496713	6.78521988214245	8.98190555204987	1.4420152673157e-16	2.82961486416666e-15	18.8552528885693	28.9239523915061	6.78521988214245	9.79218009906016	6.27917007613958e-19	4.54643706778714e-17	22.8625713204472	19.8954025262002	6.78521988214245	6.39199532205305	1.01871192447586e-09	1.44591369925606e-08	8.02871491738093	41.8834746001139	6.78521988214245	14.8997680551678	7.27248241915242e-35	2.84921913955834e-33	47.4918089314331
52	ZSCAN10	99.4849122549814	3.33209117991336	18.1991734650992	2.94340910865451e-45	2.24484001353384e-42	45.4134939990172	108.629289401822	3.33209117991336	19.916255189715	1.60178241799374e-50	9.66151982366628e-47	50.0826951416906	-23.0846074728563	3.33209117991336	-2.4390328619758	0.0155458704048104	0.036623714462733	-3.78648741564932	97.2217855262899	3.33209117991336	15.7376976140386	1.58317767773205e-37	2.58736466189353e-34	33.2381797202407	-54.0933277540921	3.33209117991336	-4.90037676691373	1.89360661633146e-06	9.87818499353941e-06	-1.63550450072418	-60.9559882838982	3.33209117991336	-4.80422836104554	2.9299779208574e-06	2.99009343573672e-05	-2.28101368253733	-55.9187117007058	3.33209117991336	-4.58987095394456	7.57756768007046e-06	4.78935769392299e-05	-2.34176912134385	-40.9348910606349	3.33209117991336	-3.81519167835085	0.000178326666639202	0.000411301827893644	-2.72552914752254
53	TTC3	-100.597602655085	6.5586299944701	-19.3583351316131	7.96326569074417e-49	2.27749398755283e-45	44.845587022155	-124.941904984051	6.5586299944701	-18.710061936354	7.75467415772181e-47	8.87134723643375e-44	31.1326694773231	48.4434419353128	6.5586299944701	15.4672683801381	1.14221476348157e-36	1.67524831977297e-34	52.9679185701999	-35.7688194763344	6.5586299944701	-6.98454467207966	3.59670787819137e-11	6.01554650972357e-10	7.45561353966813	43.3693062444682	6.5586299944701	12.0052954833039	1.07700112967013e-25	4.24858376669872e-24	32.9406190318386	45.8338819918679	6.5586299944701	13.0880010190854	4.17783506892714e-29	7.46788018570726e-27	38.6609496749106	42.236344490166	6.5586299944701	12.1946719886381	2.74596768364328e-26	4.42448877477171e-24	34.7720209212825	53.2378679818188	6.5586299944701	16.0976963461011	1.1455248422507e-38	5.77304149574802e-37	54.0711530373276
54	PRXL2A	-46.6775020559804	7.13026471656165	-14.9758873956362	4.16434878259567e-35	6.70988029195697e-33	44.3852799171269	-61.6587419737088	7.13026471656165	-17.7682355993228	6.43791709796776e-44	2.94599086403005e-41	50.4265337353981	24.362841103295	7.13026471656165	9.50103970629872	4.52262119908412e-18	1.28703449048563e-16	23.4865551473088	-12.501748486605	7.13026471656165	-3.63636820704804	0.000346857407114425	0.00109675200038392	-0.811271984675566	16.4930278250209	7.13026471656165	5.40487454301365	1.73243668108073e-07	1.07712367562846e-06	4.63666986585029	19.7751691126183	7.13026471656165	6.85446082648381	7.60999186132202e-11	2.0877291820989e-09	10.3662153820662	0.8526173098615	7.13026471656165	0.273596363486026	0.784660147225099	0.852223194057027	-5.21114352530126	7.88606873754397	7.13026471656165	2.60055878239971	0.00995963443429976	0.0169854230662476	-2.81187230588098
55	UBE2R2	-31.7080426094533	7.21947313683705	-14.2409648845438	9.08263746444059e-33	9.27726541010717e-31	43.9852121992776	-35.222098262356	7.21947313683705	-14.5147374653269	1.22152555615504e-33	1.16452103020114e-31	42.4947714736304	8.22818729706328	7.21947313683705	3.85414215796817	0.000153770341860259	0.000646977826730917	0.191299903251656	-5.93541568850138	7.21947313683705	-2.28494838505503	0.0233012973275058	0.0441628299248951	-3.39386392512113	12.2363410171467	7.21947313683705	5.09778864656444	7.5778243955974e-07	4.22673384132785e-06	3.58045150878743	11.3498614782856	7.21947313683705	4.79462071772233	3.05954264880939e-06	3.10019201969703e-05	2.6774963690324	12.4058734380404	7.21947313683705	5.21180383518335	4.41267738152699e-07	3.66867945092069e-06	3.98756283444233	14.9812372801818	7.21947313683705	6.49341275252548	5.82326996472656e-10	2.92057029357614e-09	8.75197766111853
56	SKA3	47.740159993852	4.80697010286037	15.3166298825927	3.4375824835685e-36	6.67497116369522e-34	43.9473695131566	57.4843666822568	4.80697010286037	18.2988272327883	1.44540595919879e-45	9.72673186660834e-43	54.4753619401195	-14.6040937698198	4.80697010286037	-3.25211594080695	0.00133192314344814	0.00443457530880288	-2.24508346250861	36.6488655694891	4.80697010286037	9.10536617509817	6.37573141920523e-17	3.03909864315449e-15	14.1689711679486	-25.7776889948899	4.80697010286037	-5.27557964888431	3.24885604834789e-07	1.92674511109901e-06	1.31053682160585	-13.7862012027202	4.80697010286037	-2.61874478519798	0.00945995246994858	0.0265424588391729	-3.37336114915704	24.8061022248709	4.80697010286037	5.86591290105375	1.69038416710041e-08	1.92801544084035e-07	3.70501989832115	-53.3466724885183	4.80697010286037	-9.73072436222511	9.54332884839061e-19	1.14200504210867e-17	10.4304963462006
57	C4orf48	-48.2936029383035	7.10496007337086	-14.9377125228744	5.50777719258661e-35	8.40119614442544e-33	43.9066163544768	-56.0185803170333	7.10496007337086	-15.2837949338241	4.37110100460514e-36	6.14152439416753e-34	40.7198624115439	11.9326005773325	7.10496007337086	4.31767315648076	2.41674995060928e-05	0.000121881130011978	1.57491202926251	-12.8769523606648	7.10496007337086	-3.60785498902766	0.000384797584899413	0.00120605051267104	-0.898403327165281	16.3972662758506	7.10496007337086	5.39652887678886	1.80477759213645e-07	1.11966679251849e-06	4.75695734897143	28.0901824561058	7.10496007337086	9.69997036671984	1.17630414649492e-18	8.369099991439e-17	23.135956098387	5.47760524962797	7.10496007337086	1.55766180555699	0.12079913167773	0.204909743265354	-4.34392142048122	50.640272003315	7.10496007337086	19.4169507897096	5.27467118643901e-49	4.6776928971211e-47	70.8827290346023
58	VSIG10	51.9613497813481	4.70669367086883	15.2109945586168	7.44676323275492e-36	1.3522376409955e-33	43.7705104063249	57.018836063898	4.70669367086883	16.4898871130558	6.60032272574438e-40	1.67794871072257e-37	48.1660226988765	-13.7455015157855	4.70669367086883	-2.65465133769481	0.00853898981035534	0.0220909189123621	-3.18846907816478	57.1545034049892	4.70669367086883	13.8881732644435	1.20392309666946e-31	6.88644011294932e-29	32.4557775352347	-32.8240935110137	4.70669367086883	-5.2966365340428	2.93478177651018e-07	1.75229141561985e-06	0.510805938904859	-34.9259923092666	4.70669367086883	-4.87601999224393	2.11627881011197e-06	2.25421132101312e-05	-0.953953298925641	-45.7290134851047	4.70669367086883	-6.68040818288848	2.0468981725006e-10	3.34232643957368e-09	2.33176433331913	-28.2960780371225	4.70669367086883	-4.95030590099657	1.50580034272839e-06	4.8280145517973e-06	0.311793685637713
59	CAPG	52.3446792837112	5.07975848819722	14.7614606530234	2.00321979435956e-34	2.72819457708017e-32	43.7447335265685	53.232533245408	5.07975848819722	14.686253572071	3.47575688924137e-34	3.51881936397533e-32	42.7034901721459	24.3236156968469	5.07975848819722	5.51080323192041	1.02681817357129e-07	8.10124131424525e-07	3.69065428074615	40.5250226144963	5.07975848819722	9.01648102006936	1.14792723651637e-16	5.38208507612592e-15	15.130577598462	-39.5809982366959	5.07975848819722	-6.84132507897241	8.2044105759038e-11	8.62669641436943e-10	5.14896539431696	-57.5814583957842	5.07975848819722	-7.61762956646259	8.35912075836253e-13	3.17702131148396e-11	3.98021343721323	-26.8044042311513	5.07975848819722	-4.13004015463591	5.21053131434167e-05	0.000266228129683201	-1.31885869288053	-39.6203689184918	5.07975848819722	-6.4930588365824	5.83470224073001e-10	2.92502163163678e-09	3.79086344016197
60	VPS28	-32.4961720744452	6.95710302245228	-14.6275836148667	5.34269096306036e-34	6.64352006710984e-32	43.7392961454133	-26.7276765676986	6.95710302245228	-11.7126140353893	8.83382064190535e-25	2.32319329065281e-23	30.3680183025045	4.32496488282529	6.95710302245228	2.03703268142366	0.0428846519774258	0.0868165667354011	-3.74364166340906	-12.201540300581	6.95710302245228	-4.68268386125635	5.04149468813564e-06	2.5318129601524e-05	1.72791008997154	12.0660125565463	6.95710302245228	5.19171248516985	4.85684407472878e-07	2.79207518667825e-06	3.73829590002896	15.6430285107255	6.95710302245228	6.91720103822347	5.3071129965932e-11	1.49909562175373e-09	10.0533443628682	7.57939321836581	6.95710302245228	3.18470089992371	0.0016663894572428	0.00563675203750964	-1.71910578979519	21.3519940967027	6.95710302245228	9.8393577769425	4.55054125964738e-19	5.6279126497693e-18	22.9633924302816
61	SLIRP	22.7163040270021	8.50107537252642	12.5419703622887	2.22024122767082e-27	1.11224460109776e-25	43.6709118849498	19.1901885464883	8.50107537252642	10.2421046340766	2.85050113224303e-20	4.22317046132042e-19	30.1794670289155	-8.2989492802558	8.50107537252642	-3.60049171660641	0.000395211643903509	0.00152127227666761	-0.358087156334616	16.2289176592169	8.50107537252642	7.17150174823455	1.20739366588855e-11	2.21710811200081e-10	12.9048509332606	-4.55625950952968	8.50107537252642	-1.8367606789655	0.0676398055527197	0.114045596982036	-4.04265111880377	-7.67900268946046	8.50107537252642	-2.91280991325571	0.0039639476505988	0.0129121757183514	-2.1517750442297	-7.59334434714647	8.50107537252642	-2.88072801104565	0.00437347612029298	0.0129651637253567	-2.21910761220505	-3.75712002171489	8.50107537252642	-1.56767893534941	0.118441601620133	0.160313762722944	-4.40823737437718
62	TEAD4	61.5737634727229	3.886092786231	16.6351311244021	2.29870412269806e-40	7.73446328343112e-38	43.578387287619	65.4296979756307	3.886092786231	17.4850969064633	4.92820927309092e-43	2.08810052163556e-40	45.7636730241459	7.87924321707921	3.886092786231	1.52989594398307	0.127527372152374	0.213697544664298	-4.36106513748722	49.570471910073	3.886092786231	10.5318407581607	3.80002976811587e-21	3.50583391510045e-19	16.5172439994054	-42.2775879520216	3.886092786231	-6.10091196447959	4.91485118356846e-09	3.93738778291479e-08	0.806862836110905	-40.7955033456069	3.886092786231	-5.65850387222004	4.89407236237741e-08	7.76237746021072e-07	-0.135487039406166	-14.3458735093972	3.886092786231	-2.10792125568288	0.0362079143483137	0.077084040899759	-4.03999274196634	-77.1897362330663	3.886092786231	-9.90971143883234	2.81245947257465e-19	3.54735792351201e-18	5.60640687456096
63	MARCKSL1	-26.2442560446802	9.99600209439405	-12.2665676651799	1.63291200144952e-26	7.11188762216199e-25	43.4028292324003	-24.1426009570194	9.99600209439405	-10.8294649424276	4.71343841602991e-22	8.68304919152692e-21	34.4609690103794	3.04767231645103	9.99600209439405	1.47673657485475	0.141224317259586	0.232294204090533	-4.75059460181145	-8.97892175749416	9.99600209439405	-3.50675095086819	0.000553190200676407	0.00165971568207136	-0.465253246081714	21.2739289956043	9.99600209439405	9.6020540963956	2.28543427893746e-18	5.39079755691641e-17	27.4852247703687	17.2109999157101	9.99600209439405	7.75710503543147	3.56275522057836e-13	1.43513801843016e-11	17.4399850370556	20.309779794439	9.99600209439405	9.1471635690818	4.83143996542247e-17	2.5009806879834e-15	24.9192464598536	27.9840032756025	9.99600209439405	13.6893241076787	5.16154894618e-31	1.47252169437155e-29	52.5671986993028
64	CCDC167	-54.1158578839351	6.08728149682117	-16.4997047440039	6.14589031009418e-40	1.87347948527708e-37	43.2514791092838	-58.5052831643414	6.08728149682117	-15.7199195183924	1.80266018591266e-37	2.98875833722331e-35	35.6242513569615	18.8340119632169	6.08728149682117	6.79992122440194	1.03933318063709e-10	1.2798677703432e-09	9.49681815626932	-33.1010916873408	6.08728149682117	-8.38489346206988	6.95699922580738e-15	2.42646558363526e-13	11.0031017452169	12.5526430978721	6.08728149682117	3.88717428262241	0.000135491917691524	0.000478994912976216	-0.378561773849307	16.6609085631953	6.08728149682117	5.41456443610252	1.65198213452943e-07	2.3983090887077e-06	3.98218379520329	27.6047000192874	6.08728149682117	9.39845448037563	9.01958323265957e-18	5.08295725032638e-16	19.2560920801266	25.0651904770933	6.08728149682117	8.22675480439733	1.90211705339427e-14	1.54766849863659e-13	14.0306196194889
65	MAGED2	-35.0317518512229	7.72161730037103	-13.5657227161757	1.27495774580162e-30	1.06463624904894e-28	43.184909933114	-41.987006322066	7.72161730037103	-14.7094008450163	2.9335182786717e-34	2.99637938464323e-32	45.6307056175262	6.70427724746759	7.72161730037103	2.68161731062899	0.00790129865534982	0.0207366039498054	-2.56960754170006	-21.609799182622	7.72161730037103	-6.82845333652059	8.83115619214419e-11	1.33989956018739e-09	9.40348178694727	0.279467452913677	7.72161730037103	0.0946724350317552	0.924664082410175	0.946506541049785	-5.26317620104936	17.2523589888471	7.72161730037103	6.47440795752686	6.46941106264236e-10	1.51971381019771e-08	9.26978039921779	13.7985813911957	7.72161730037103	5.0095915572156	1.1445804455303e-06	8.77613960915997e-06	3.67287210126753	10.2403299028524	7.72161730037103	3.77144283617692	0.000210323483699233	0.000479398416720309	-0.045054574003343
66	TUBA1A	-60.631490898766	9.33344576989691	-12.8172485472327	3.00332640534628e-28	1.73938645980921e-26	42.6126132714707	-67.5148785512261	9.33344576989691	-12.5288382419377	2.44221561528916e-27	8.98358412826625e-26	38.4256583283864	-26.094124492899	9.33344576989691	-5.88398725215517	1.53894235256933e-08	1.38625988294434e-07	7.97883190637486	-33.4540674342584	9.33344576989691	-6.14285221236151	3.9292439335757e-09	4.1352852438e-08	8.14250810270165	72.139947801903	9.33344576989691	20.2752068630301	1.32053348988514e-51	2.36045361316969e-49	89.9004816778176	40.4846277517296	9.33344576989691	10.6426085959772	1.75096249739896e-21	1.56492273205032e-19	33.5557418948795	26.6627628824833	9.33344576989691	6.52684531241249	4.83697009947423e-10	7.32913085271326e-09	11.1255652391001	96.6729905216045	9.33344576989691	31.0655792992424	5.0639471759514e-81	3.62072223080525e-78	143.792835915147
67	NDUFAB1	21.7618895102822	8.98521737628577	12.2192153657707	2.29964151610065e-26	9.68507436080219e-25	42.5779813324796	22.5504186375895	8.98521737628577	12.2714250075101	1.57653778113484e-26	5.21259890641113e-25	42.4423268551528	-8.88409751490168	8.98521737628577	-4.03964091668976	7.47487054090377e-05	0.000338931902449223	1.02673406784525	18.8580920871823	8.98521737628577	8.79105802315342	5.0438533837461e-16	2.14504396691656e-14	21.4279079463795	-2.83644595493522	8.98521737628577	-1.22476531977059	0.222017452993246	0.309326472079251	-4.82457323976123	-7.67909691921166	8.98521737628577	-3.03236269366995	0.00272788534145741	0.00945953570969164	-1.83000343371572	-9.13800703386012	8.98521737628577	-3.62145523647168	0.000366238093947584	0.00149314461680697	-0.372530534468001	0.213790306418016	8.98521737628577	0.0950112118642951	0.924395312114022	0.940597854966325	-5.45496305092904
68	UNG	34.0477757092757	6.02180916844454	13.7232506336241	4.02672225286452e-31	3.51646584524963e-29	42.4873089493922	6.12363339361842	6.02180916844454	2.18911106264869	0.0296761665867101	0.0429143402543249	-3.52131403744729	-1.78432597359297	6.02180916844454	-0.564472525810557	0.573026983601762	0.680871280889505	-5.04377914949978	15.7268933844317	6.02180916844454	4.784948836162	3.19555621223659e-06	1.70683577104249e-05	1.88753929409441	-18.2096761053222	6.02180916844454	-4.98538739524232	1.28056918158715e-06	6.86490695283833e-06	1.92170129536667	0.153818632788345	6.02180916844454	0.0417652059021029	0.966725025802657	0.977145634845591	-5.05333549075316	10.1032753311379	6.02180916844454	2.91276908339427	0.00396444577921008	0.0119554701586509	-2.48162594401585	-9.95020003801315	6.02180916844454	-2.82229606414161	0.00521991464972618	0.00938190472786607	-2.65715503703491
69	KMT2E	-42.9488409109847	6.49004278671746	-15.3682538078716	2.35633307551523e-36	4.81365185426682e-34	42.3999158981213	-47.3087857557204	6.49004278671746	-15.7720163747544	1.23225592906728e-37	2.1687704351584e-35	41.1021786587403	-3.49221799652095	6.49004278671746	-1.34049530659045	0.181513455578154	0.282480469570682	-4.57856693167393	-8.52574468040315	6.49004278671746	-2.77850584470089	0.00594916276612236	0.0134875985026635	-2.68126432907227	16.2381654259241	6.49004278671746	6.11799150072169	4.48723802427072e-09	3.61761825212523e-08	6.70195416502026	23.0490928797318	6.49004278671746	8.80662513722788	4.55614817260095e-16	2.47025284808317e-14	17.2810453936869	1.04986480077506	6.49004278671746	0.350590925046897	0.726242008126826	0.807645867412169	-5.08276486899663	34.3427416204273	6.49004278671746	14.0362225970637	4.07082522737558e-32	1.2385702287547e-30	41.5292232722496
70	SPP1	82.3939771422756	6.17521894041355	13.0085264829048	7.45764431227889e-29	4.76622630907657e-27	42.386218829952	76.7823772444761	6.17521894041355	11.8406726495581	3.52209599767772e-25	9.77980053724106e-24	35.8928798317972	-62.137641368187	6.17521894041355	-5.06475694519102	8.84882139528695e-07	5.94773894019287e-06	1.40075945848228	68.0840545413259	6.17521894041355	8.6873585539384	9.90996469043756e-16	4.02021262619169e-14	17.7887304338071	-2.7497474471647	6.17521894041355	-0.269792604365739	0.78758120958568	0.841883699350775	-5.06740506674405	-13.8719053586042	6.17521894041355	-1.03061372721379	0.303891725609299	0.420377429379732	-4.67245869502462	-18.7527244751925	6.17521894041355	-1.38207837499458	0.168396392060004	0.267637500023124	-4.46473711094311	5.13030171360928	6.17521894041355	0.555002941836435	0.57947545428349	0.640749970713622	-5.04993247525664
71	GNG5	-27.2688608752579	8.85182558656728	-12.5024043340094	2.95847604677025e-27	1.4402113180873e-25	42.1126330039505	-32.7650527627029	8.85182558656728	-13.7737526835007	2.78238074322025e-31	1.87237857073174e-29	47.2317638204994	7.4821484304231	8.85182558656728	3.49497717476933	0.00057677611757912	0.00212848993067908	-0.482791032463841	-1.98429798600728	8.85182558656728	-0.781740422724776	0.435235896600792	0.5246679301489	-5.16862170159833	7.44509069566671	8.85182558656728	2.98697736275586	0.00314796908609631	0.00791837430627568	-1.87972946180847	12.8255698143179	8.85182558656728	5.5043829770652	1.06010537610303e-07	1.5894633686263e-06	6.21125537238507	12.8916594009114	8.85182558656728	5.3974427943608	1.79671450056725e-07	1.65095693867384e-06	5.71341968649005	1.42015353225106	8.85182558656728	0.574940069157004	0.565939081411467	0.628393971789496	-5.30264537873156
72	TBC1D23	42.1601677172349	4.79773334899791	15.0716849419587	2.06479413422282e-35	3.42336882543609e-33	42.0551277265967	37.4664059741578	4.79773334899791	12.8751138140692	1.9709834782343e-28	8.84237293764719e-27	32.2775931709723	-12.5625520895644	4.79773334899791	-3.31003878844929	0.00109553884781431	0.00372450651381743	-2.0786237897488	29.9724390674958	4.79773334899791	8.31276439351051	1.10193905521519e-14	3.77430622504842e-13	11.2070872781162	-13.3138768391282	4.79773334899791	-3.10780424018718	0.00214207127508552	0.00563384695731586	-2.63689029516094	-22.9398066686011	4.79773334899791	-4.81798309447621	2.75367507438398e-06	2.82783149469953e-05	-0.191006239103594	-12.9843456701823	4.79773334899791	-2.9026072541231	0.00409021620047097	0.0122717213043241	-2.99011533698536	-11.3909730637326	4.79773334899791	-2.81170480880486	0.00538842187586587	0.009653599481298	-2.96104902123515
73	VIM	-87.8226303528048	9.5936179644381	-13.0814037806381	4.38375971840407e-29	2.91570995224085e-27	41.897689571813	-96.7473149779937	9.5936179644381	-11.5812088074616	2.26472277227157e-24	5.68167291990938e-23	29.8491217216635	-20.7487263236798	9.5936179644381	-3.9048934400923	0.000126556403349339	0.000543674522837565	0.777145586149683	-28.2931207987695	9.5936179644381	-4.40817166456737	1.65319455840287e-05	7.29932294408679e-05	2.11920004028747	18.2423785216815	9.5936179644381	3.4159240127224	0.000761264937192579	0.00224455435089771	-0.678065968376742	37.6294365315615	9.5936179644381	8.00241175719778	7.79579725710258e-14	3.36543096683975e-12	18.9992987232606	30.1850645827157	9.5936179644381	6.21985469226176	2.59848280977444e-09	3.40901873208941e-08	9.98064686084397	-9.28698655349234	9.5936179644381	-1.61128509238658	0.108599543922249	0.148396892316117	-4.43525620255504
74	TENT5B	73.5538957914145	3.94513921923372	15.8888571011361	5.25218802269925e-38	1.25177147874332e-35	41.7944241377983	75.9507525730324	3.94513921923372	16.2771872457027	3.0997485487877e-39	7.09222467962625e-37	42.7722091112202	-26.7201407648581	3.94513921923372	-3.52220715049398	0.000523599220247406	0.00195686869638364	-2.39693293425953	65.1836457034951	3.94513921923372	11.8787182868401	2.6791347334263e-25	4.78895333599952e-23	22.7803205074277	-44.1892174413782	3.94513921923372	-5.07839501019223	8.30080047977721e-07	4.59860326821556e-06	-0.696250443083672	-19.0704212277344	3.94513921923372	-2.27452891893695	0.0239308671460944	0.0565755569645215	-3.88978226994818	1.06430019403893	3.94513921923372	0.131101868034905	0.895818560613426	0.930974230870057	-4.83197025590708	-76.5094694436436	3.94513921923372	-7.5410317830648	1.3305198662928e-12	8.98002788813551e-12	1.81707221234365
75	PDPN	55.8331931342299	5.1830000375977	14.1275743372094	2.08466121012898e-32	2.03833540545945e-30	41.2897131048896	58.2679596337972	5.1830000375977	14.443725891196	2.0554652714149e-33	1.89633247620859e-31	41.9693647648484	-2.94554047328873	5.1830000375977	-0.545657904798611	0.585872535228086	0.692537900703586	-4.95358435036278	52.033724970119	5.1830000375977	10.964234184594	1.82217159030566e-22	2.00438874933622e-20	23.5313268742204	-11.8414707734381	5.1830000375977	-1.97256288051283	0.0498400724969465	0.087826621898501	-3.94296267212392	12.0427583566369	5.1830000375977	1.97352594093176	0.0497295496511297	0.101872871231517	-3.94901307300321	-27.6770132085028	5.1830000375977	-3.91807440488324	0.00012027533133316	0.000557516122549171	-1.55897374427609	-12.0084630564421	5.1830000375977	-1.97330762751903	0.0497545855995723	0.0736039682429599	-3.94804463778017
76	GABRB3	59.0273177175438	4.83103908913852	14.5306844491131	1.08679777234058e-33	1.29510067870586e-31	41.2810899866974	65.8550407988146	4.83103908913852	16.0897470421256	1.21384093918936e-38	2.52478915351386e-36	47.0997136051228	-33.2450524249525	4.83103908913852	-5.0370661523401	1.00715230462447e-06	6.69484158332596e-06	0.676410743222635	60.6291540998656	4.83103908913852	12.5859975092441	1.61291743926223e-27	4.39327988218094e-25	28.5677679035768	28.2233637656248	4.83103908913852	5.27152607134919	3.31296024116807e-07	1.95968279001876e-06	2.41659518590537	-17.1122231475472	4.83103908913852	-2.35551036033849	0.0194064238723231	0.0478365630466227	-3.69922143068808	-59.7365672829771	4.83103908913852	-6.56729207690509	3.86123449405661e-10	5.98543666829371e-09	1.2490724500442	47.0170340880095	4.83103908913852	9.61470019538479	2.09785841396064e-18	2.42419194502118e-17	17.38576697372
77	NFE2L3	64.9463421890112	4.35063228106189	14.9666092400143	4.4571651952833e-35	7.08194025472791e-33	41.1701814218683	67.7581547650829	4.35063228106189	15.3744914258358	2.25123641466287e-36	3.30181340817221e-34	42.1207213008431	0.502943702148474	4.35063228106189	0.082236380394137	0.93453602949761	0.956354967121626	-4.96421051018229	57.3481737530871	4.35063228106189	10.6101455568166	2.19788737222341e-21	2.11292702001981e-19	19.1274337345392	-71.5781547244372	4.35063228106189	-8.42757321819866	5.29478115517287e-15	8.82978081853902e-14	5.36323377812511	-14.4736593187931	4.35063228106189	-1.95232114824617	0.0522114867154799	0.105998120323885	-4.06627192296549	-46.9410350075509	4.35063228106189	-5.6123890415897	6.17700972603557e-08	6.2757541088674e-07	0.402859395695442	-20.8513705228526	4.35063228106189	-2.88903392264899	0.0042638991897496	0.00778347003841318	-3.09103755856223
78	VASH2	60.65597169195	4.91959468683885	14.3816233229109	3.2401318143256e-33	3.49689697697027e-31	40.9964466832286	66.2040328778853	4.91959468683885	15.4818265587076	1.02687897469491e-36	1.58749938790672e-34	44.8986463845232	-56.4523659307344	4.91959468683885	-7.57883088390238	1.05814835046657e-12	1.66509176469567e-11	5.66590323406596	62.2777771344163	4.91959468683885	12.4166528596439	5.50894439981048e-27	1.34090050923046e-24	28.1462505300535	44.1270021352811	4.91959468683885	8.60984997675764	1.63784931665199e-15	2.86498412576433e-14	13.7770224874845	-38.6070738637375	4.91959468683885	-4.920152013323	1.72965703229344e-06	1.89170902958288e-05	-0.214626536130838	-29.2444342612734	4.91959468683885	-4.13280013208582	5.15294725811007e-05	0.000263757121399459	-1.12959516047608	25.9942414379509	4.91959468683885	4.78193762953313	3.23908149444659e-06	9.88399367737235e-06	1.34131369411794
79	ESRP1	83.1972601541637	3.66378219803444	16.2769766513332	3.10450311177684e-39	8.07170809061979e-37	40.8936556174597	92.1088209777669	3.66378219803444	18.053995755574	8.30769594026539e-45	4.7520020778318e-42	46.3418879414948	75.0086676361057	3.66378219803444	12.8276917890195	2.78353787212588e-28	1.96565884303211e-26	25.2776560939128	85.6385869718158	3.66378219803444	14.8522282496529	1.03021025022548e-34	1.17856052625795e-31	31.8184438628458	-54.2487481237757	3.66378219803444	-5.35313981495229	2.23090036448652e-07	1.36260011584227e-06	-0.865781341247707	-56.1024300510444	3.66378219803444	-4.67863257098054	5.13261568740589e-06	4.88901943912767e-05	-2.34491220031433	-75.3976677493033	3.66378219803444	-6.10955218110304	4.69376439517069e-09	5.89425517900688e-08	-1.05018462736784	-78.51896603273	3.66378219803444	-5.82100262386123	2.1325860351198e-08	8.89744137190757e-08	-1.77640942051053
80	HSPA9	20.0671464275461	7.85734427762439	12.2527294385294	1.80479388646369e-26	7.76197069967843e-25	40.7612456354012	21.4789232277582	7.85734427762439	12.7320272316231	5.58240037640793e-28	2.30551120238652e-26	42.8804368941358	-11.3861619627198	7.85734427762439	-5.34531299209901	2.31755669356689e-07	1.72385231303025e-06	4.88492546843967	19.1443804796502	7.85734427762439	9.29526377897506	1.80077829476004e-17	9.71740740191268e-16	21.9882991541785	0.010025192460926	7.85734427762439	0.00449073999092486	0.996421126222134	0.997380145592897	-5.2938581700534	-11.393606173792	7.85734427762439	-4.31039191329961	2.49108050189325e-05	0.00018699449436784	0.873275081270553	-3.43643206031534	7.85734427762439	-1.45199482629451	0.147975547275386	0.241489338206907	-4.48179968765147	-3.44076731893573	7.85734427762439	-1.56075698119716	0.120066766919255	0.162244721657958	-4.38301996559631
81	CNMD	76.3162307547812	5.16113620766392	13.6771656230293	5.64182778195796e-31	4.78092665374808e-29	40.6689971689887	77.9731803745914	5.16113620766392	13.7923230834064	2.42872394323574e-31	1.65384535182243e-29	40.804900463801	-43.2714009635027	5.16113620766392	-4.56779656924681	8.34128417821743e-06	4.63224713586444e-05	-0.0071356471923556	67.9054444022985	5.16113620766392	10.2828362639604	2.1495880014406e-20	1.79498443331974e-18	22.0970225376716	-12.1901647355557	5.16113620766392	-1.3849673994576	0.167512405235851	0.244531658105347	-4.46677088289158	-4.58796244208233	5.16113620766392	-0.441858958953247	0.65903988626033	0.749370470014728	-4.85812397535045	-14.4154551370156	5.16113620766392	-1.38943625419427	0.16615194131561	0.264842999672646	-4.46018243405448	20.1192356974852	5.16113620766392	2.545864124353	0.0116081866382233	0.0195624093326663	-3.14984412356505
82	MDK	-28.8909737322992	10.1165599893413	-11.775410060005	5.62895565121386e-25	1.9108383575634e-23	40.5287666572576	-33.5232228466659	10.1165599893413	-13.0245608675413	6.63502168914881e-29	3.14020867658892e-27	47.2532525493593	31.297031018682	10.1165599893413	14.4804174200544	1.57084114645455e-33	1.76180614857255e-31	58.6459185844618	-10.6605096261927	10.1165599893413	-3.67990804103736	0.000295654677418549	0.000952117186573363	0.0451894730280014	-11.8083259498273	10.1165599893413	-4.01081070475386	8.37585633290964e-05	0.000311507790794819	1.03509986778165	11.7149314533851	10.1165599893413	4.56886382279264	8.30271424794875e-06	7.391057759887e-05	3.10254610225658	10.076555445996	10.1165599893413	3.9212930080614	0.000118787174654352	0.000552858127764763	0.881379059736181	-14.4628769414338	10.1165599893413	-5.02424401865283	1.0691721473546e-06	3.49666362656851e-06	4.5940866033664
83	VRTN	89.5108463383981	3.36712566395275	16.9069973785676	3.20294092304827e-41	1.26350497102318e-38	40.5097895413188	89.8239837372348	3.36712566395275	16.7885155497645	7.55656538486199e-41	2.29150493336987e-38	39.7076159713044	40.2833569474367	3.36712566395275	5.69509871687212	4.06473892082031e-08	3.4091358690751e-07	1.83837789606715	83.121155593691	3.36712566395275	13.7604798530735	3.06627291359779e-31	1.52513748398081e-28	26.4459384368639	-69.8514112993037	3.36712566395275	-6.07931144355689	5.51317655472221e-09	4.36475707861745e-08	-0.776867216269441	-74.6119675321795	3.36712566395275	-6.03743446178524	6.88327697642842e-09	1.29181437249643e-07	-1.22785575648799	-3.52544324540772	3.36712566395275	-0.391689977262326	0.695679180823888	0.784868819391053	-4.78132335880217	-98.8142558970229	3.36712566395275	-7.11935843831761	1.63982520052553e-11	9.8012540721066e-11	-0.875501600278194
84	POU5F1	116.825279729671	2.5764405551257	18.7140066404198	7.54067450089313e-47	9.58503514335749e-44	40.3171802656511	115.759990537201	2.5764405551257	18.2396921632587	2.20406037110355e-45	1.4008028136347e-42	38.4274990081044	-53.9853804651291	2.5764405551257	-3.83996309318734	0.000162313076969818	0.000677686715523618	-3.32715550795196	101.796472855072	2.5764405551257	14.1624378142937	1.61473477145582e-32	1.15453536159091e-29	23.7696321278368	-50.0211932893846	2.5764405551257	-3.8973231474618	0.000130303322038556	0.000462510085051531	-3.0872955936328	-73.3155819841845	2.5764405551257	-4.86001039684585	2.27621661130756e-06	2.40664676833258e-05	-2.79295145567227	-59.1884572347277	2.5764405551257	-4.19218825953874	4.0514731624314e-05	0.000212317237646428	-3.09135617923193	-56.1088322792196	2.5764405551257	-3.92587282266935	0.000116699758330663	0.000277671637958151	-3.30321343448227
85	H2AFY	-65.1441869527007	7.25841530175346	-14.5809633054026	7.51848661167556e-34	9.05384071974404e-32	40.3055275021113	-68.8519645050695	7.25841530175346	-14.7862878371561	1.67005134049625e-34	1.80007346998221e-32	39.6481728250595	30.9526430004994	7.25841530175346	9.50471953248431	4.41177055024446e-18	1.25861982780041e-16	24.1013799420555	-16.2870583103767	7.25841530175346	-3.65368447105715	0.000325566286715841	0.00103630448526133	-0.71355402771868	20.5920406402008	7.25841530175346	5.06014466608831	9.0419753801324e-07	4.97308645907282e-06	3.49618132779982	24.2343986910551	7.25841530175346	6.52739853423618	4.82211555753402e-10	1.16627911158962e-08	9.2966204954604	25.2184851941928	7.25841530175346	6.89755060362473	5.94257037142881e-11	1.0808108910834e-09	10.9125559538183	20.2509454982062	7.25841530175346	5.34552469495153	2.31517026132682e-07	8.38415567887901e-07	4.75601908874863
86	FABP5	34.1074420071055	8.10067405918804	11.9927032774134	1.17929773316673e-25	4.46727353226073e-24	40.2819201411507	29.1945068702407	8.10067405918804	9.84543740272607	4.36541010907712e-19	5.60497100424717e-18	27.7370857495366	5.62328461206844	8.10067405918804	1.59137774799884	0.11300873577394	0.193884213745332	-4.39711812855241	21.6544295273308	8.10067405918804	5.87899144092594	1.57942062214391e-08	1.43743611116359e-07	7.16925119634941	-3.34055387289717	8.10067405918804	-0.844703037520911	0.399225164316185	0.496697757452655	-5.05188369923494	-33.8268420726895	8.10067405918804	-6.63812337465453	2.59699686136977e-10	6.66135517804265e-09	7.83846491616306	0.796929229106987	8.10067405918804	0.195347768625451	0.84530706473693	0.896478429645914	-5.28856298420022	-5.29902547042572	8.10067405918804	-1.40050152173954	0.16281934649585	0.212898996903935	-4.59303443361921
87	MAD2L2	26.232901512061	7.28963972207464	12.3734006652985	7.53616732304869e-27	3.46239976609145e-25	40.1310503538607	29.311349267727	7.28963972207464	13.5355876056573	1.58931855268299e-30	9.77516357134052e-29	45.8511742046536	-9.25543935245787	7.28963972207464	-3.33482857052586	0.00100683936762797	0.00345685545187995	-1.26481098100278	31.9907889698654	7.28963972207464	12.2933891293317	1.3449199666343e-26	3.13997641189722e-24	35.4999577068444	-3.30989177077441	7.28963972207464	-1.13514677131245	0.257590546631564	0.349151167472167	-4.7683125032214	-9.65729381080285	7.28963972207464	-2.90681999347576	0.00403764010212374	0.0131148786962793	-2.3907383050853	-6.04579431416814	7.28963972207464	-1.91994694419997	0.0562014865396164	0.110131039056734	-3.91757668249185	0.315158556357295	7.28963972207464	0.110023492215993	0.91249441478059	0.931068513569096	-5.24157219184673
88	CLDN6	46.1377715600604	6.79902641508707	12.5175634647943	2.65039078870697e-27	1.2957466078123e-25	40.1198059599382	42.6110188232627	6.79902641508707	11.2941525245766	1.75663808166393e-23	3.97939399093769e-22	33.3238103628392	35.9923855796862	6.79902641508707	8.41074683328599	5.89697975829803e-15	1.20898653109193e-13	17.4664994687952	43.2460636055688	6.79902641508707	9.69481384995857	1.21825176128391e-18	7.96388579947883e-17	22.8104576998443	-26.8923640134964	6.79902641508707	-4.46308351942309	1.30922429786375e-05	5.81877465717222e-05	0.814210902370456	-15.3609692887905	6.79902641508707	-2.3701640366758	0.0186734880148244	0.0463897291834073	-3.40153062035444	-48.6076604679155	6.79902641508707	-6.61408029231604	2.97214487993273e-10	4.68983964502489e-09	5.17710806011872	2.64067595347299	6.79902641508707	0.491438249895109	0.623622917544788	0.681225865353307	-5.08165370196727
89	TPST2	42.8617031737984	5.47361319744424	13.6931365263147	5.01953828469054e-31	4.31755774262104e-29	39.9267195561548	45.0924536138244	5.47361319744424	14.2948485755744	6.11971143917731e-33	5.29430764004763e-31	42.2941781309935	-18.8108324124991	5.47361319744424	-4.14391854871039	4.92706592393201e-05	0.000233108495325815	-0.368044337209905	43.289898441302	5.47361319744424	11.5252896105018	3.37840520532341e-24	5.12981364345514e-22	26.10660327167	-31.2668528231447	5.47361319744424	-6.34259168526868	1.33502565659673e-09	1.17121882756646e-08	4.42213909751543	-9.02227928561391	5.47361319744424	-1.861425044587	0.0640628936220787	0.124596991335699	-4.05608381620727	-34.9867985882437	5.47361319744424	-5.99912705017185	8.42533054767672e-09	1.01887718250974e-07	2.22866077484109	4.74827046415145	5.47361319744424	1.12262940030994	0.262859724130435	0.325093539897532	-4.67758113863793
90	MARVELD3	84.0960644441175	3.35280587303314	16.6874055806334	1.57307268904284e-40	5.62373486332814e-38	39.8706778566077	84.404597323262	3.35280587303314	16.5337575252965	4.79895791136489e-40	1.24772905695487e-37	38.8690290253502	65.9443656641761	3.35280587303314	11.3115883798622	1.5516330204242e-23	7.0719847624115e-22	18.950123198932	76.0847878788538	3.35280587303314	12.891514264159	1.74912974127594e-28	5.55834562227686e-26	23.1800297435238	-85.4400408250714	3.35280587303314	-7.49196862812708	1.78950770025519e-12	2.31321673343722e-11	0.544385249045057	-35.1118190170683	3.35280587303314	-3.24425084989225	0.00136745020665295	0.00537028162173354	-3.47384792297515	-72.394419205707	3.35280587303314	-6.41063973351764	9.19562292454376e-10	1.31661985302604e-08	-0.600952736753584	-62.5079127745453	3.35280587303314	-5.0395753819979	9.95430162250705e-07	3.2742153697953e-06	-2.37982286515588
91	WDR74	34.1267837200082	5.59258095390618	13.7039610663521	4.63725779888651e-31	4.01895675903497e-29	39.8380219444395	32.2424660573649	5.59258095390618	12.5461671493188	2.15364133276903e-27	8.02529538986243e-26	33.9450147406067	-11.7137894051526	5.59258095390618	-3.55073320476369	0.000472848166848876	0.00179059352159919	-1.34805820943003	14.3185538504657	5.59258095390618	4.3812578584113	1.85197500481803e-05	8.07723753531006e-05	0.517408293042432	-7.83226764978436	5.59258095390618	-2.2836645858744	0.0233780773049464	0.0457640664559525	-3.51764495228656	-16.0582495169593	5.59258095390618	-4.13290232574856	5.15082679781943e-05	0.000343989834016662	-0.667306778542907	-4.90405089852927	5.59258095390618	-1.29044612668684	0.198295930978057	0.303641473750364	-4.53484957797248	-6.60832440410396	5.59258095390618	-1.91524946095327	0.0568011475671468	0.082893880363332	-3.96684170139348
92	AP1M2	77.1905822440286	4.43152497635093	14.638410410771	4.93519395943147e-34	6.27317987732177e-32	39.8322055927714	80.8710358222384	4.43152497635093	15.1626326276855	1.06097247291588e-35	1.41134012676251e-33	41.3946737775008	79.9734507975149	4.43152497635093	13.8702269857543	1.37299862682918e-31	1.22711752272858e-29	33.9792636115991	64.7873841108475	4.43152497635093	10.2560238405621	2.58853654834061e-20	2.13042144697961e-18	18.6928385427	-58.5719360236964	4.43152497635093	-5.97620602628699	9.5047278882185e-09	7.287807442441e-08	1.26355075018249	-47.9623735018318	4.43152497635093	-3.99115954159811	9.04823042966977e-05	0.000549425457088228	-2.55115723341414	-71.1424296931584	4.43152497635093	-5.91028521926043	1.34203151522654e-08	1.56501942244563e-07	-0.239145614621859	-9.31812233620099	4.43152497635093	-1.07380445416563	0.284126233366694	0.347884149560068	-4.63287993198453
93	PSMA5	16.7561924238867	7.91422112912766	12.0723986701794	6.6388520207819e-26	2.62797464075242e-24	39.7586602086593	14.3137895516355	7.91422112912766	9.8245699740161	5.03409420602032e-19	6.41314451190116e-18	26.8559582935811	-7.36738688451497	7.91422112912766	-4.1732462022259	4.3757052508383e-05	0.000208924742160699	1.13427863510004	7.89080459408666	7.91422112912766	4.32941408571856	2.30134918038054e-05	9.75812995683964e-05	1.52447557890486	-4.62289872449436	7.91422112912766	-2.40521337134681	0.0170185129351112	0.0348285846113905	-3.14788687101184	-3.69440511925812	7.91422112912766	-1.86703043052002	0.0632723001661479	0.123458146665654	-3.98535667614648	-5.33719828262111	7.91422112912766	-2.69689606017252	0.00755936036543855	0.0206591214956085	-2.62930029387075	-6.23334884030991	7.91422112912766	-3.29703097747082	0.00114494236091888	0.00232113071219422	-1.30882715733041
94	SPINT1	61.537161397625	4.37743487711045	14.5809893248473	7.51705316530792e-34	9.05384071974404e-32	39.635115924296	61.2265620386275	4.37743487711045	14.2061531244476	1.17217663717369e-32	9.57835766376212e-31	37.4992486132412	76.6952706974548	4.37743487711045	16.6144512355578	2.67098868901527e-40	5.26829493143702e-38	43.3229811808781	56.2153340847862	4.37743487711045	10.9158843341022	2.56344443380501e-22	2.76658531346503e-20	20.5741050747564	-79.0436531123656	4.37743487711045	-7.98705551875581	8.57989926138933e-14	1.27142548640277e-12	2.46646009211961	-63.2841187178871	4.37743487711045	-6.45231855554813	7.30926638191392e-10	1.69267221475901e-08	0.380115746756326	-88.5790796596012	4.37743487711045	-8.49469054526744	3.44196431362218e-15	1.25003402374088e-13	2.61232651471695	-69.9572950057244	4.37743487711045	-7.233719795178	8.36534666458551e-12	5.21523519579609e-11	1.59784437820533
95	PA2G4	16.4855570854519	8.34797046510065	11.8379573810349	3.59151330644758e-25	1.27204062618453e-23	39.3013789420138	14.4261260261513	8.34797046510065	10.05754122584	1.01929252516719e-19	1.4082978850136e-18	28.9545333293265	-8.3178988886388	8.34797046510065	-4.75956708078148	3.5808477962649e-06	2.14813313000894e-05	3.16941819417159	14.7818698567136	8.34797046510065	8.43939820763122	4.9084577810288e-15	1.77698598148638e-13	18.5405071473888	-3.0955126276744	8.34797046510065	-1.65776344739622	0.0988383670455962	0.156803622105342	-4.28275285498942	-8.65815659168254	8.34797046510065	-4.24930972505947	3.20695794322021e-05	0.00022958447353216	1.15593835842132	4.22741934307336	8.34797046510065	2.22040418074797	0.0274458234462485	0.0610906572240114	-3.44906420675509	-13.765167828234	8.34797046510065	-7.13317208139632	1.51227861077337e-11	9.10550910907757e-11	11.8068260383026
96	SERPINB9	63.9401739119763	6.4006862084002	12.532267160731	2.38220360063169e-27	1.17467280996666e-25	39.234421346972	58.912811353076	6.4006862084002	11.2063267582879	3.2797908600787e-23	7.14682046462863e-22	31.9510123751895	-18.5338655424782	6.4006862084002	-2.3331951734655	0.0205712014693002	0.0465069859988976	-3.40115133851145	62.0859066723511	6.4006862084002	10.2114036955999	3.52533427420869e-20	2.84012845753151e-18	24.6646235676341	-23.9025863127594	6.4006862084002	-2.82863472451174	0.00512137402064337	0.012130128115147	-2.70573108915448	-15.3590502256381	6.4006862084002	-1.6338476692422	0.103769148291642	0.182734752530353	-4.26413703530195	-33.5286968052927	6.4006862084002	-3.1864305515916	0.00165691353313037	0.00560801503521048	-2.51608726931215	-4.55308944829682	6.4006862084002	-0.615508685233875	0.538876437377751	0.602696853999901	-5.01042144886687
97	NANOG	114.816931334667	2.50582140332894	18.644124866776	1.23824173266665e-46	1.41654854217065e-43	39.1435540930584	122.356521436159	2.50582140332894	19.8557593424758	2.44268007300827e-50	9.66151982366628e-47	41.7118185543124	-57.855669175067	2.50582140332894	-3.90778486133261	0.000125152467449897	0.000538857443593083	-3.45245889859786	112.333593537925	2.50582140332894	16.4303695581161	1.0172518316883e-39	3.87912031817139e-36	29.5556540818976	-47.0446708902521	2.50582140332894	-3.87101571062571	0.00014415944137513	0.000505109956916228	-3.06088372689281	-77.307236230173	2.50582140332894	-5.028805044829	1.04669804453401e-06	1.22061423338116e-05	-2.83493172148784	-58.880956543276	2.50582140332894	-3.79858032130704	0.000189891075174604	0.000837130597301531	-3.59600627710336	-50.5597166741511	2.50582140332894	-3.44799904435456	0.000680595721282896	0.00143315935786253	-3.69903975932977
98	PTOV1	-27.3729599089613	7.02589432284643	-13.1841817898444	2.07111707096546e-29	1.45359382158557e-27	39.1140709674944	-27.2154775233293	7.02589432284643	-12.5685477997703	1.83074250885598e-27	6.91211033046614e-26	35.2420525486927	0.629999805815455	7.02589432284643	0.299973346440591	0.764490252737222	0.83507767509919	-5.25808966293155	-2.83199788431302	7.02589432284643	-1.16165820191867	0.246675399512653	0.330402361599901	-4.71698963708288	7.14864759187911	7.02589432284643	2.95440906983498	0.0034851624390811	0.0086580365479018	-2.2195500760239	19.7472828586937	7.02589432284643	9.11360713659353	6.03669196524938e-17	3.67339128098154e-15	19.6283301151986	9.54117201693937	7.02589432284643	4.15686781440951	4.6759017443335e-05	0.000241827829815439	0.692939197523751	19.5261283288949	7.02589432284643	9.21969450328502	2.98205178124319e-17	3.09289867429031e-16	20.4181469936797
99	RABGAP1L	47.8576763446563	4.57768694335217	14.6872119257284	3.45143442470621e-34	4.48686475211807e-32	38.9484794925614	43.9175103198126	4.57768694335217	13.0472575105838	5.62317742152475e-29	2.68038123759346e-27	31.7826477897977	-10.2223428846832	4.57768694335217	-2.3035210640296	0.0222149412610501	0.049743379922962	-3.59436890498831	50.8615041155068	4.57768694335217	13.194171385384	1.92548922788745e-29	7.59572302311463e-27	28.1719862852583	-30.6856947299524	4.57768694335217	-5.93890109335274	1.15574294313893e-08	8.7271942372999e-08	2.14931743424939	-17.6219365059304	4.57768694335217	-3.29159644426348	0.00116619047688216	0.00471921438115739	-2.62173788955849	-23.9316006772737	4.57768694335217	-4.274260398563	2.89350235084873e-05	0.00015777724925505	-1.34364536573151	16.5616574787217	4.57768694335217	3.95860678009733	0.000102763184644523	0.000246873337323257	-0.860716033697667
100	NOP58	22.0815471301306	6.78531778295395	12.547046665495	2.13993891850646e-27	1.08322571804044e-25	38.940257167362	13.4327118182041	6.78531778295395	7.24112171505179	8.00704617584657e-12	4.24666704922043e-11	12.5703696107765	-10.7746602502017	6.78531778295395	-4.72531337784913	4.17253235633236e-06	2.47325233971203e-05	2.17698087626786	21.24965615437	6.78531778295395	9.59910355040582	2.33154468176702e-18	1.43402533115133e-16	20.7776430816089	-1.56000883060409	6.78531778295395	-0.659504272177064	0.510284966961934	0.603251009821693	-5.02555020672413	-11.6146135638608	6.78531778295395	-4.39391920159864	1.75576095078025e-05	0.000139388655634463	0.718177018390775	5.62423967375108	6.78531778295395	2.28229893120555	0.0234599954724394	0.0535586406315519	-3.42561504795835	-11.7422701956844	6.78531778295395	-4.79991579732055	2.98746591302178e-06	9.15281468799387e-06	2.10655816135098
101	PDCD2L	36.5829363323786	4.48664266828014	14.9122565614652	6.63672861697967e-35	9.99002307608519e-33	38.9275310329871	31.9653846634138	4.48664266828014	12.3701456949901	7.71593570258897e-27	2.63493446082441e-25	28.0460683442459	-2.38926367689632	4.48664266828014	-0.738148096707285	0.461237565229443	0.580160279958749	-4.8265268895294	17.8329209183434	4.48664266828014	5.57224053854463	7.55685958641145e-08	5.8930111566835e-07	2.55070149433259	-12.8860126433221	4.48664266828014	-3.61064917875334	0.000380913723098132	0.00120377154481841	-1.9205988587079	-14.6726635108522	4.48664266828014	-3.66571622049675	0.000311504636659923	0.00157056546645638	-2.15103711632575	-29.1344087946364	4.48664266828014	-7.05684967779117	2.36282793131167e-11	4.55063157141507e-10	3.74689006947181	-1.35816007998976	4.48664266828014	-0.395272734945196	0.6930374953222	0.744236266449448	-4.9011027996106
102	ATP5PD	19.5043400849648	8.31629500093361	11.7608477030874	6.24933643098256e-25	2.1151600227941e-23	38.8306035523075	22.7710870676606	8.31629500093361	13.4355118218592	3.30347291774577e-30	1.93803744507752e-28	47.9261557132263	-12.2642321296122	8.31629500093361	-5.75697682992453	2.96399728872347e-08	2.54183875434756e-07	6.69246901856917	24.3308648726328	8.31629500093361	12.1101500043073	5.05581032291769e-26	1.05160854716688e-23	37.5343539147812	-5.28045427749973	8.31629500093361	-2.37634495424075	0.0183717217007037	0.0371657818313086	-3.17559964430082	-6.04190757817694	8.31629500093361	-2.53975303890348	0.01180675542529	0.0318785183066597	-2.89842363912221	-11.1269586587067	8.31629500093361	-4.32803386954364	2.31463620484984e-05	0.000129801167566089	1.21360918586024	-0.650735420279627	8.31629500093361	-0.300890261763018	0.763791905065076	0.8050935780464	-5.33378585632425
103	PTMS	-42.3584825786011	9.17389791707861	-11.9717547171982	1.37140408537699e-25	5.04465039765683e-24	38.7638916207915	-57.5235660519379	9.17389791707861	-14.4373265138868	2.15415721684843e-33	1.97148468485968e-31	49.2105315320757	18.9415091985837	9.17389791707861	6.20147221649442	2.86895851701965e-09	2.8891624502381e-08	9.77955239061093	-18.4806253874207	9.17389791707861	-4.55937594428151	8.65170778814318e-06	4.11010703956508e-05	2.52065034153262	19.6835959483287	9.17389791707861	5.49969784669002	1.08505785844832e-07	7.00511393941803e-07	6.28789270710865	22.8213755541173	9.17389791707861	6.80994949356893	9.81551123520943e-11	2.6510316251466e-09	12.2198457420652	14.9548458343967	9.17389791707861	4.23225602592299	3.43962362166287e-05	0.000182849880259401	1.71550253205218	38.3333449377078	9.17389791707861	12.2341743468555	2.06393219611377e-26	4.37247857843363e-25	42.1201431750112
104	EPHA1	91.5290802805886	2.90492422436101	17.704921102976	1.01430929460172e-43	6.10720964749665e-41	38.7613039674615	96.4357741018548	2.90492422436101	18.4914050069305	3.66623355142911e-46	3.49514265236242e-43	40.2329860734971	29.248278066693	2.90492422436101	4.29726576995168	2.63064547808482e-05	0.00013193592402144	-1.1618814137786	83.5883090214086	2.90492422436101	13.8040479503269	2.2289532283018e-31	1.15905567871694e-28	22.9153969742379	-73.3769566276048	2.90492422436101	-5.95244445876491	1.07664318203389e-08	8.16763793267088e-08	-1.83101513210254	-67.3311908960848	2.90492422436101	-6.08584354872071	5.32508685619051e-09	1.01531656058032e-07	-1.17041355152564	-30.2223443369053	2.90492422436101	-3.01244709455867	0.00290543324193991	0.00911383501173365	-3.61887784133521	-45.8632583573149	2.90492422436101	-4.23609004719512	3.38594943143294e-05	8.79946876319692e-05	-2.81364706700105
105	PPDPF	-24.3120415155084	8.71732235767571	-11.8928298888296	2.42052359591189e-25	8.70779557774591e-24	38.657307441752	-27.220310693763	8.71732235767571	-12.6258679578662	1.20745511139368e-27	4.74683383998066e-26	41.7366927944972	15.4339460017735	8.71732235767571	7.79085824559273	2.89480471165122e-13	4.91343707734272e-12	16.9579373202741	-3.17142120242392	8.71732235767571	-1.30453251175538	0.19346092948349	0.270363185107638	-4.7156223301572	9.43924086293799	8.71732235767571	4.00324552010922	8.62887105628595e-05	0.000320292942517558	0.804381301414078	13.0035158347023	8.71732235767571	5.76644003692113	2.82366787433455e-08	4.73647514404506e-07	7.11650662485216	9.37806610398411	8.71732235767571	4.08941981596251	6.13239790856668e-05	0.000308643343924342	1.11098882376543	12.5364651320386	8.71732235767571	5.61685345876973	6.03969172311363e-08	2.38337610598206e-07	6.561137586434
106	EZR	27.2614471477802	7.41553670818567	12.026626973885	9.23511670208422e-26	3.55723013709911e-24	38.6387300491273	24.5297996502116	7.41553670818567	10.3753697389665	1.1306817209799e-20	1.75270987642413e-19	29.1823086730348	-7.59966845516491	7.41553670818567	-2.60864106338268	0.0097347120031421	0.0247038831668025	-2.76748131083306	26.3922916427726	7.41553670818567	9.30073763874621	1.73606130974627e-17	9.45740065880826e-16	21.3823596388445	5.2631658209005	7.41553670818567	1.64414365832473	0.101622780850749	0.160530877234544	-4.26116626969398	-17.5742893305232	7.41553670818567	-4.76734237339081	3.45829000830242e-06	3.44024675608519e-05	1.88331829844391	-35.2181843444614	7.41553670818567	-9.00434068587734	1.24369455604533e-16	5.78368525250347e-15	15.3573227811757	-2.19800879597464	7.41553670818567	-0.709330314694433	0.478895829209959	0.54401488723851	-5.06811329748508
107	SCG3	66.9166193145349	3.91221733382595	15.2077914571632	7.62340628504016e-36	1.36268387345093e-33	38.5384734332371	71.3981273088349	3.91221733382595	15.9861040128533	2.5839249021291e-38	5.09656911730292e-36	40.5349865586393	-86.5863721741328	3.91221733382595	-8.79235049691195	5.00146188428127e-16	1.16294154382475e-14	3.08066550481953	58.4900751394856	3.91221733382595	10.990272549559	1.51595955756432e-22	1.68374537267338e-20	18.8655093720047	101.216834065738	3.91221733382595	21.1523769245834	3.15057791476499e-54	6.6745576564651e-52	51.2671898980905	-53.3486213592118	3.91221733382595	-5.73633360734923	3.29417117313933e-08	5.40678884084849e-07	-0.561366396856761	-35.6204120419692	3.91221733382595	-4.2447980587069	3.26700234649668e-05	0.000175147498962013	-1.99112192514478	123.944464786404	3.91221733382595	28.6300270663819	6.30876629692671e-75	2.67304764580895e-72	72.6574650949068
108	AKIRIN1	19.8430793781055	7.99209114352035	11.8278336341696	3.86258117741456e-25	1.355457934651e-23	38.4958065215882	17.7311963990753	7.99209114352035	10.3286989071986	1.56373983331123e-20	2.39480370723968e-19	29.9308666274328	-13.5249062622503	7.99209114352035	-6.18262780236258	3.17485358015386e-09	3.17763122983028e-08	8.01897220518562	18.590098273323	7.99209114352035	8.93422492866668	1.97380015593239e-16	8.96042610470893e-15	20.5080249840304	-1.83032042645519	7.99209114352035	-0.789888170166162	0.430472214465535	0.527485232806954	-5.05373742236347	0.00444556247876449	7.99209114352035	0.00185043989681615	0.998525296631719	0.999049273523427	-5.26154672032189	-2.16552772138778	7.99209114352035	-0.883022537226992	0.378220364348555	0.503472302553813	-4.96190161897895	8.50993972367681	7.99209114352035	3.94507713994281	0.000108320035008038	0.000259080326257988	0.465084370810191
109	B3GNT7	100.525931526586	2.91509365633532	17.395144607226	9.42063121373379e-43	4.89872823114157e-40	38.268421849135	103.804618657989	2.91509365633532	17.7945203692093	5.33121896538785e-44	2.54121437350154e-41	38.8285760248963	-29.2203406865363	2.91509365633532	-2.87927384883173	0.00439292270878937	0.0125543431897453	-3.57045519236261	117.938642966097	2.91509365633532	18.9415021964954	1.50523490422957e-47	1.72198873043863e-43	38.2841107617498	-63.3204294345507	2.91509365633532	-5.26789738707552	3.3713868705497e-07	1.99115466180117e-06	-1.82226866325867	-73.8136572971696	2.91509365633532	-5.30773875050453	2.78128382737582e-07	3.79688388844623e-06	-2.36656829211214	-56.4093744526084	2.91509365633532	-4.41275789307875	1.62143129944484e-05	9.43978323951599e-05	-2.80439085530488	-39.1709068063206	2.91509365633532	-3.605820387123	0.000387649053143855	0.000846964317793296	-3.07508709710914
110	DPPA2	102.933235763856	2.46442918114816	18.5231364460404	2.92546277739582e-46	2.99045148554689e-43	38.2415825497687	101.414757118448	2.46442918114816	18.0391888609544	9.23603066615822e-45	5.03143765813572e-42	36.6147254464145	-32.150698756289	2.46442918114816	-3.11788176726793	0.00207328360882478	0.00653758668273305	-3.55146560798187	82.4570594045989	2.46442918114816	12.4778268153161	3.53574582958078e-27	8.79324615008785e-25	17.7829428385564	-49.3865430001013	2.46442918114816	-4.10940246829445	5.66099830029744e-05	0.000219606037827747	-3.12405490617829	-50.7964201885691	2.46442918114816	-4.05345350190784	7.0766593741355e-05	0.000447007534859482	-3.25739761111869	-34.0156295960485	2.46442918114816	-2.9448157832839	0.00359061922222697	0.0109801346972137	-3.82012703123013	-33.7887396853325	2.46442918114816	-3.08181608750069	0.002329302850679	0.00445754844626426	-3.66676980026606
111	TIMP4	105.836331935175	2.47205293456998	18.1530568319816	4.09175923202147e-45	2.92560785089535e-42	38.1721391392535	107.960807169647	2.47205293456998	18.3899050345759	7.55170152977746e-46	5.39946659379088e-43	38.3787637229315	-71.4064304283288	2.47205293456998	-4.57813939233243	7.97465262305362e-06	4.45459111365886e-05	-3.28176431307273	77.8706344026101	2.47205293456998	11.0827769581646	7.87829785096353e-23	9.29151829020853e-21	14.5110338254012	-40.9147240464843	2.47205293456998	-3.26231168998819	0.00128714440347593	0.00357660329020988	-3.65305946070967	-32.3038392667466	2.47205293456998	-2.38370475515826	0.0180180129813387	0.0450450324533468	-4.1873408193415	-2.81671495454901	2.47205293456998	-0.259141965558522	0.79577617091989	0.860826772581553	-4.73536226624765	-38.6188071974747	2.47205293456998	-3.00938565356216	0.00293364933138335	0.00552625528585963	-3.83295675213226
112	SLC25A5	17.7072075493416	9.2947681787594	11.4089096307741	7.75569725463691e-24	2.16402869739137e-22	38.1647686983198	19.308100610496	9.2947681787594	12.0284903920585	9.11188741361456e-26	2.735957795584e-24	41.388404653121	-6.95078000850219	9.2947681787594	-3.78511035812179	0.000199786046588505	0.00081568607172466	0.339961202396798	20.8334006127413	9.2947681787594	11.524072874832	3.40791815474293e-24	5.12981364345514e-22	36.8492090309786	4.18097083815189	9.2947681787594	2.15043372267103	0.032648282763167	0.0609789967037764	-3.57889319361411	-13.4275941924514	9.2947681787594	-6.11089172442366	4.66037220724014e-09	9.03638272047919e-08	8.13100617873266	6.3655350252921	9.2947681787594	3.12634468793046	0.00201709953015429	0.0066654011048426	-1.53321928956419	-12.6878923079506	9.2947681787594	-6.28830213135246	1.79419951469453e-09	8.47116898394776e-09	9.28535348986401
113	DNAJB6	21.7444971011581	7.31071484606732	12.0241262674315	9.40310788638543e-26	3.60978369866608e-24	38.0925164245187	20.5375560408867	7.31071484606732	10.9079911885782	2.71023412841826e-22	5.24620616397715e-21	31.5441652959445	-17.8234365886766	7.31071484606732	-7.26609896131734	6.90617112853814e-12	9.85119672200453e-11	11.3394872773403	18.6060085625778	7.31071484606732	8.0555754825609	5.59051964536447e-14	1.6655089776815e-12	15.1983401477154	5.99447246058438	7.31071484606732	2.44899198418659	0.0151342911556075	0.0314284288705226	-3.09663300790554	-3.3075475594294	7.31071484606732	-1.22193822760879	0.223082589745612	0.331652349147473	-4.65827850165111	-11.136807988059	7.31071484606732	-4.03281779301967	7.67936630976865e-05	0.000377695402337719	0.0778191060711855	14.3312493497761	7.31071484606732	6.21682228524581	2.64131142180252e-09	1.21841139779923e-08	7.75148849585245
114	TARS	28.8376793247856	6.58044474804741	12.4090674612325	5.82021515701008e-27	2.71768413862022e-25	38.0452553243967	33.0874231800723	6.58044474804741	13.9832640513834	6.00001784282831e-32	4.40001308474076e-30	45.3833823207423	-19.0065710721853	6.58044474804741	-5.92069968194025	1.2710618325233e-08	1.15679772188278e-07	5.50220297162827	25.021350466039	6.58044474804741	8.62768339890875	1.45931252645005e-15	5.71730661047555e-14	16.646454504791	7.30083299061608	6.58044474804741	2.32807080495908	0.0208471885278215	0.0415129393835123	-3.34300854714192	-9.94099625130437	6.58044474804741	-2.76687237266051	0.00615785521114951	0.0186512744547393	-2.75446277772532	-0.680267040284485	6.58044474804741	-0.195421869059382	0.845249132160675	0.896478429645914	-5.08535747797191	3.22011453829257	6.58044474804741	1.0554333074221	0.292423770392945	0.356682794892344	-4.79874522689359
115	NAA38	-30.6314412844501	6.68699628158814	-13.4245608321699	3.57875776052047e-30	2.71853000500304e-28	37.8589701634547	-34.655770401052	6.68699628158814	-13.956068901653	7.32245999782869e-32	5.33560142516944e-30	37.4747197484218	-3.75414524231362	6.68699628158814	-1.67077142651851	0.0962366143832965	0.169768214116409	-4.23439137596508	-13.9714896856327	6.68699628158814	-5.03811569166634	1.00223307751219e-06	6.06783041410038e-06	2.43708509448364	3.33154067743577	6.68699628158814	1.33203593040312	0.184272973381375	0.265134299519926	-4.56572147815853	21.0717279877759	6.68699628158814	9.01809939059707	1.13572691332269e-16	6.66293122482646e-15	18.2871227380996	9.78669201615881	6.68699628158814	4.01875293244859	8.1178360201579e-05	0.000396533066057243	0.195821208286793	11.0066189413912	6.68699628158814	4.60060072125417	7.23111335098066e-06	2.08530216121045e-05	1.83240947686041
116	MZT2B	-26.8466483325348	8.21247360251643	-12.0511363941236	7.73917783796603e-26	3.0217131217178e-24	37.5024305779141	-32.0506126532299	8.21247360251643	-13.3759626293207	5.10471783117188e-30	2.85146319304541e-28	42.6668580327847	6.27913302271912	8.21247360251643	2.9150229600954	0.00393703371639762	0.0114430045009118	-2.02477592420383	-2.66821111293552	8.21247360251643	-1.03433125325437	0.302155132711476	0.389877590595453	-4.91300652723643	2.00989162427232	8.21247360251643	0.811162091043622	0.418178755756745	0.515785038939191	-5.09751159864968	6.39322008305083	8.21247360251643	2.6576770989974	0.00846519775186242	0.0242529081596058	-2.62589169166737	3.07865446085367	8.21247360251643	1.24081665001181	0.216039446121479	0.325710498633331	-4.75291536252717	3.97861592892724	8.21247360251643	1.6323921062798	0.104075490106284	0.14291484897562	-4.32273820036003
117	CHD9	-42.4989298921695	6.31283139245586	-14.3509189787522	4.05773248357634e-33	4.25875776257921e-31	37.4656747177809	-53.4964168460189	6.31283139245586	-16.3521487508016	1.79662316634926e-39	4.37305723894373e-37	40.4551990348072	-4.42473290874679	6.31283139245586	-1.63222263166564	0.1041112051809	0.181145579812851	-4.27006421829683	-13.2563198574928	6.31283139245586	-3.94687100750385	0.000107567179949567	0.000388559690124106	-0.519851959897678	14.3479416326388	6.31283139245586	4.93451088564269	1.61931149665463e-06	8.54616159648166e-06	2.53621968703633	17.0796435723097	6.31283139245586	6.14705661039589	3.84185389391624e-09	7.59081322044935e-08	6.66312018689293	17.4343483864844	6.31283139245586	6.12889547900049	4.23353966426764e-09	5.36342123579423e-08	6.43685875918895	24.8809262576437	6.31283139245586	9.08438733530508	7.32657630142003e-17	7.35228358668817e-16	18.1465422619081
118	RDX	-29.1257085446409	7.39449780116293	-12.6067498667633	1.38730239384803e-27	7.14898170523488e-26	37.4546310047476	-35.9063420469349	7.39449780116293	-14.270782286571	7.2999724507188e-33	6.14056506148699e-31	42.7577330959901	6.1075300000105	7.39449780116293	2.69607305078302	0.00757743322596436	0.0200152011325404	-2.56425030716438	-8.6801750123964	7.39449780116293	-3.20075535221972	0.00158033261403383	0.00419856133407967	-1.66921727892425	1.13322160782922	7.39449780116293	0.429889175792472	0.667711177920895	0.743128307755135	-5.16767867163641	14.0603053299076	7.39449780116293	5.62923693379156	5.67420045890803e-08	8.84371297682668e-07	5.54792610347807	8.47525839113525	7.39449780116293	3.37467828174287	0.000878161971783515	0.00323028069363454	-1.16996880494388	3.71127444469658	7.39449780116293	1.45875337791723	0.146107167447129	0.193335889721286	-4.47896714981158
119	PMAIP1	58.0812570472092	5.95973138535858	12.4185354063089	5.43430275461033e-27	2.55837133797293e-25	37.4275894525472	60.5838705672727	5.95973138535858	12.6497414290851	1.01520822801944e-27	4.00482142363532e-26	38.0205305245148	-34.6940248782028	5.95973138535858	-4.56166067732935	8.56639992511363e-06	4.75034489303441e-05	0.64171610520813	54.5141394504097	5.95973138535858	9.55002655971257	3.24929659637432e-18	1.94617555301164e-16	20.4032126148494	-11.6274768498869	5.95973138535858	-1.59079766690103	0.113139314786584	0.176026860106053	-4.29681274866626	-15.3984220992054	5.95973138535858	-1.71124633731117	0.0884924989875123	0.161023411550364	-4.21525044315125	-43.802465310443	5.95973138535858	-4.2448560019816	3.26622442348297e-05	0.000175147498962013	-1.23681631261703	15.8943895157397	5.95973138535858	2.4528656172678	0.0149768349853181	0.0246596131594761	-3.18373504319485
120	PIM2	69.648603870024	4.62237177851241	13.5282990144469	1.67632778782758e-30	1.36979927805339e-28	37.1990282039885	69.0637462226116	4.62237177851241	13.2633657963316	1.16187979790979e-29	6.06936296259728e-28	35.7725521173487	-29.966539895353	4.62237177851241	-3.44669209649267	0.000683719953820858	0.00246587524328834	-2.27205601409014	66.149554484122	4.62237177851241	10.840020610605	4.37581945465397e-22	4.55085223284013e-20	22.1977349015876	-2.28023073058997	4.62237177851241	-0.277940941946901	0.781327503013847	0.836927587497979	-4.91158454437347	1.18362898627066	4.62237177851241	0.125669842115762	0.90011190121913	0.930196942181287	-4.86447518390402	-46.0969560744448	4.62237177851241	-3.80885099482913	0.000182659900502013	0.000808993132691844	-2.6743993512441	31.1679778873941	4.62237177851241	4.56824705552177	8.32498287491982e-06	2.37550017205117e-05	0.658971347222894
121	PDLIM1	40.5876440161855	6.75201909085693	11.986922783174	1.22945043640436e-25	4.61195649065067e-24	36.9405716889047	40.5057452225082	6.75201909085693	11.6610266874282	1.27872184399843e-24	3.31713784474875e-23	34.790586851351	10.8081326971175	6.75201909085693	2.60482056365189	0.00984045853413861	0.0249059392987933	-2.79328559165711	35.0306932875631	6.75201909085693	8.14882952168666	3.11162651422238e-14	9.77779199600171e-13	15.0791852606524	-25.4788555036746	6.75201909085693	-4.75654111445541	3.62966922990279e-06	1.80693716231888e-05	1.61195482990523	-28.3563265929206	6.75201909085693	-4.65891488128725	5.59925592648897e-06	5.26772103610476e-05	0.793741358395692	-23.52724937191	6.75201909085693	-3.82650678219608	0.000170834717490747	0.000763241938293059	-1.03957614983911	-12.4111151353296	6.75201909085693	-2.45825411570292	0.0147602196207499	0.024348509367178	-3.1683939772145
122	HTATIP2	53.3512942150635	4.6190877178057	13.9258148180177	9.13870679488355e-32	8.43119401076353e-30	36.9156233620638	52.2686440260842	4.6190877178057	13.1741544202647	2.22836211888002e-29	1.132998339555e-27	32.9384079963472	29.4869563560286	4.6190877178057	6.2973411598678	1.70822376224613e-09	1.77172074706217e-08	5.35605790031053	39.1050664889573	4.6190877178057	8.14203529254335	3.24770372634441e-14	1.01512925216885e-12	10.7510375557137	-46.7763685349636	4.6190877178057	-6.92588348144529	5.04812603694368e-11	5.41242379218704e-10	3.50061134331691	-26.641225892343	4.6190877178057	-3.73343659981414	0.000242457356351087	0.00127234502598919	-2.29212762604678	-31.97113378978	4.6190877178057	-4.79345763999576	3.07559802684334e-06	2.12983301616754e-05	-0.450556401901074	-27.5911120319523	4.6190877178057	-4.61847353583483	6.68762337076877e-06	1.93785236478203e-05	-0.241498318385926
123	ZFP42	59.2975608774018	4.92704723929155	13.5179087384398	1.80865712295976e-30	1.45711531596194e-28	36.9149671122916	57.1233280778337	4.92704723929155	12.7005578549877	7.01744152824023e-28	2.82674405222071e-26	32.848984125307	-2.36573039759936	4.92704723929155	-0.399401323562333	0.689998006925996	0.776926889688326	-4.96829197330183	49.6481893826444	4.92704723929155	9.17039326682217	4.14031817742403e-17	2.07742280481276e-15	15.2325126939949	2.1004596548562	4.92704723929155	0.342125215892538	0.732594253779276	0.796282970378614	-4.96140099884425	-50.0129173414689	4.92704723929155	-5.90963130513735	1.34661473234314e-08	2.38981637323029e-07	1.2160186382367	6.51645539699545	4.92704723929155	0.978328746943788	0.329022454610103	0.452084238781301	-4.706748752586	-25.4646918205147	4.92704723929155	-3.49749485996876	0.000571654647191072	0.00121941621552599	-2.17427604303316
124	EIF5A	16.0868364732932	8.99641163241246	11.2516581121285	2.3765549172393e-23	6.25006626510749e-22	36.8530177775834	15.1086803005355	8.99641163241246	10.214089044886	3.46044867646525e-20	5.04943021157684e-19	30.5263256671534	-13.2754604685281	8.99641163241246	-7.59141086447463	9.80347943103766e-13	1.55334909544419e-11	15.325895395844	15.0509054542049	8.99641163241246	8.71865050954219	8.08590145489843e-16	3.30366830871565e-14	20.9859911859438	-0.874067224446389	8.99641163241246	-0.470782046779018	0.63827850971739	0.717843703417906	-5.34137791205261	-7.41894185244992	8.99641163241246	-3.69884509502473	0.000275687263237941	0.00141175572580217	-0.158326513744482	5.92727592071585	8.99641163241246	3.12791436881551	0.00200683462275446	0.0066353144752344	-1.55889862695934	-8.19040468962716	8.99641163241246	-4.39565622840273	1.74294139548611e-05	4.75309882344724e-05	2.0455468956027
125	FGF2	48.7462124288927	4.86858973906536	13.3399242605645	6.64235167727371e-30	4.87105789666739e-28	36.8243627947209	46.4086110515395	4.86858973906536	12.3446663634819	9.27932255818458e-27	3.15001335506325e-25	31.8739085342935	-43.5988527593449	4.86858973906536	-6.79913512052526	1.04400164195762e-10	1.28423427784895e-09	4.01101216616507	50.9840960735039	4.86858973906536	11.6014990178066	1.9585969739865e-24	3.13140146259151e-22	24.9935594586581	-39.8634328766005	4.86858973906536	-5.95501838695633	1.06222117794915e-08	8.07429254201878e-08	1.84781055452495	-27.0508896016712	4.86858973906536	-3.86546816151627	0.00014725455981778	0.000834783034844105	-1.97565586861677	-25.5873526990738	4.86858973906536	-3.59994927250342	0.000395989231919454	0.0016024466972616	-2.38061669662677	-29.5018571535491	4.86858973906536	-4.77661778170167	3.31738010313549e-06	1.0095990524041e-05	0.0309758621186962
126	HAGHL	54.0193078172619	4.49596121206835	13.8759792501083	1.31636861908693e-31	1.18576826790193e-29	36.7781324442254	60.0869856761204	4.49596121206835	15.4295108001649	1.50542039426527e-36	2.29626790805263e-34	42.6583337430436	-30.9139645728498	4.49596121206835	-4.65823149865621	5.61614091950159e-06	3.23507815302609e-05	-0.572999389946903	44.2679092466151	4.49596121206835	9.17269365686621	4.07747012182609e-17	2.0549012420128e-15	14.3035677668519	-20.5053355197278	4.49596121206835	-3.41839176788565	0.000754754258935422	0.00222654802649501	-2.23592502005324	-28.0146362835215	4.49596121206835	-3.80248010571248	0.000187114052128083	0.00102371341766871	-2.24320467607178	-17.8856402434695	4.49596121206835	-2.57399953205779	0.0107319496533952	0.0277386260202913	-3.54247815244465	-7.89233262351279	4.49596121206835	-1.34738342599845	0.179289399942432	0.231759405123325	-4.48763140147062
127	SCGB3A2	81.4587361008151	4.5140521710816	13.4241976681425	3.58826949961066e-30	2.71853000500304e-28	36.675505385663	87.8183844090331	4.5140521710816	14.4493915498634	1.97186912162584e-33	1.83399859767476e-31	40.8083610800693	-58.4541270570626	4.5140521710816	-4.90943809805403	1.81669717894927e-06	1.15461198484331e-05	-0.564682011323089	75.1625503890046	4.5140521710816	10.5862374889471	2.59812443863156e-21	2.43627406376599e-19	21.4671743881058	-21.2955527573858	4.5140521710816	-2.00767665856117	0.0459420501810362	0.0819166231407503	-4.00577504550752	-12.582883673613	4.5140521710816	-1.10493728487215	0.270434278598861	0.384707057583826	-4.60779782658878	-50.5724472302168	4.5140521710816	-3.62869204300107	0.00035670928197518	0.00146054194194562	-2.81068664174525	24.5994271190619	4.5140521710816	2.89621333207094	0.0041712103865925	0.00762278703236712	-2.73567918613817
128	TCF25	-24.3482387455425	6.86673499170958	-12.7927268178828	3.58996284577051e-28	2.03312747305023e-26	36.6369001578892	-25.7327449639088	6.86673499170958	-12.6161232360026	1.2960095854254e-27	5.06018759633671e-26	34.0798799223151	0.581700114180458	6.86673499170958	0.303274118831726	0.761977201288271	0.83296886600457	-5.24050127876123	-8.00054145849	6.86673499170958	-3.5294364809447	0.000510274550693324	0.0015471881420439	-1.09270070935844	11.4302456974802	6.86673499170958	5.39363554587277	1.83053714655004e-07	1.13503224696653e-06	4.24511770887002	9.55615787648704	6.86673499170958	4.42979071690473	1.50851589410976e-05	0.000122479927811325	1.28212018634941	12.5215859923094	6.86673499170958	5.8028308347957	2.34203397524786e-08	2.5928225492386e-07	5.48677773956851	11.2845404136022	6.86673499170958	5.55387267548982	8.28431688855455e-08	3.19637724131751e-07	4.99345323520994
129	PFN2	-27.6690703083165	7.28913984185283	-12.5323720521466	2.3803912157943e-27	1.17467280996666e-25	36.6173338659544	-28.5846880454087	7.28913984185283	-12.1208526120792	4.67993945482609e-26	1.4748900100058e-24	33.1727698728458	-5.80806487401031	7.28913984185283	-2.60586524012691	0.00981144131300071	0.024859997479674	-2.76546386471388	-3.27078155115203	7.28913984185283	-1.27752413811322	0.202809003513302	0.281360271510721	-4.63178995992593	9.57692887347899	7.28913984185283	3.8930937699912	0.000132442246280553	0.000469228645849962	0.02887948885492	29.8502314392667	7.28913984185283	13.3781421600605	5.02406569053805e-30	1.02634484820992e-27	40.3026962920905	16.5160023906607	7.28913984185283	7.0602583066143	2.31634217391176e-11	4.4686263860962e-10	10.9662433870408	15.5305597082321	7.28913984185283	6.7675307344112	1.24980040112622e-10	6.77938197671123e-10	9.94476169623692
130	PHC1	48.8599272481428	4.00103671570137	14.8118799726146	1.38452278041368e-34	1.97986757599156e-32	36.5672952559015	53.6039092530619	4.00103671570137	15.9878941490337	2.55041450115609e-38	5.09656911730292e-36	39.795986424825	-24.022840191887	4.00103671570137	-4.84277871101411	2.4614140489348e-06	1.52373250648345e-05	-0.154417342200039	45.7038878026233	4.00103671570137	11.2854663560592	1.86863063260582e-23	2.51495699258948e-21	19.0031924429236	-16.3692354224785	4.00103671570137	-3.20239549916126	0.00157177688935581	0.00427774300683866	-2.77873748937687	-30.8033968994018	4.00103671570137	-4.6480406382117	5.8738351485556e-06	5.5034131121602e-05	-1.75734619194498	-21.1818970192434	4.00103671570137	-3.83781952453488	0.000163643042356712	0.000734435623601719	-2.14558008721461	-4.31855546882857	4.00103671570137	-0.886537113614902	0.376328774491565	0.444073013741001	-4.71415367695025
131	CDH1	80.2426741134374	4.07503227188256	14.3585551693102	3.83689859687382e-33	4.06427036557746e-31	36.5542076032373	81.2256920098937	4.07503227188256	14.4209067865828	2.4296084464489e-33	2.20593020852186e-31	36.5069246691919	63.3489115738961	4.07503227188256	9.95300579962121	2.09038916173534e-19	6.93160927833399e-18	17.3609006383834	83.6326178768668	4.07503227188256	13.0910340005498	4.08643483848832e-29	1.50802627588085e-26	27.8348794441641	-81.237620928239	4.07503227188256	-6.63552911018686	2.63512098624064e-10	2.56559864532705e-09	0.582684512462543	-71.5834733591333	4.07503227188256	-5.21972635193751	4.24860458427462e-07	5.56747267400936e-06	-1.7725840858506	-77.7784977436535	4.07503227188256	-6.22285606336721	2.55676343417294e-09	3.36199697551016e-08	-0.112547654153433	-50.8042749700843	4.07503227188256	-4.44453541888517	1.41690087124411e-05	3.92478110581903e-05	-1.90017485210628
132	ZNF398	46.1400822511	3.98632253811598	14.7927335226913	1.59301721336684e-34	2.24989097789094e-32	36.2187217881323	47.0795296901171	3.98632253811598	14.7485092959797	2.20262333242917e-34	2.27009107414322e-32	35.2277615913216	-27.5010932949564	3.98632253811598	-5.71906000714667	3.59783551212247e-08	3.05109253214834e-07	1.28407728647287	47.2926083486797	3.98632253811598	12.5208631930696	2.5876956641535e-27	6.72800872679909e-25	22.8097721534612	-14.506435782866	3.98632253811598	-2.98453968073266	0.00317213076410174	0.00797213882718012	-3.06750410813217	-23.2392613168384	3.98632253811598	-4.24710652445416	3.23614655296885e-05	0.00023109560902599	-1.78037474741551	-19.9602882824557	3.98632253811598	-3.78669793183982	0.000198594955618275	0.000869803327822766	-2.26430514491409	-11.3842058096738	3.98632253811598	-2.49788462477387	0.0132507165213434	0.0220556084685245	-3.52348365457967
133	HSPE1	17.4596831235672	9.83037680950358	10.9604838754199	1.87108462523949e-22	4.42256365965698e-21	36.1596776320818	14.2841073445857	9.83037680950358	8.58286422460301	1.94999802677539e-15	1.58888728107624e-14	22.0958849822152	-8.02557658266854	9.83037680950358	-4.3375605914147	2.22440123681265e-05	0.00011304820146218	2.20828491745472	15.8744060349674	9.83037680950358	8.61420547992189	1.59234075465587e-15	6.1960470181167e-14	21.5874482734893	-8.71981792525218	9.83037680950358	-4.25478132594359	3.13555422848103e-05	0.000128522896359093	1.78676821402213	-4.55400398734703	9.83037680950358	-2.15694820061812	0.032130393868856	0.0717073167888632	-3.56871632653613	-1.29573871965376	9.83037680950358	-0.63175906397233	0.528222296882521	0.643220208018156	-5.35039617877054	-11.9421985539718	9.83037680950358	-5.87477005138701	1.61443438391127e-08	6.84802719760659e-08	7.8833282595458
134	SAP18	19.2700174306038	9.08144143310434	11.1145688799024	6.28926515158021e-23	1.57783318715082e-21	36.1366247316586	20.5469580392222	9.08144143310434	11.4815979618326	4.61636462480434e-24	1.11651609530151e-22	37.8872832148408	-12.260025946242	9.08144143310434	-5.74712987681645	3.11724732819953e-08	2.66526976342321e-07	7.16263796991189	19.0153428901731	9.08144143310434	9.22629164638634	2.85378139750188e-17	1.48396632670098e-15	23.8192083859821	-4.42491534205745	9.08144143310434	-1.99863141347537	0.0469205933989958	0.0833496255410733	-3.82470377421269	-6.42733428741295	9.08144143310434	-2.67729231350816	0.00800059367943501	0.0231420459400092	-2.58238223487779	-8.57528499409554	9.08144143310434	-3.55740732338037	0.000461660371607739	0.0018363680984675	-0.515074947506713	-2.05883305011556	9.08144143310434	-0.933867317758655	0.351430585528473	0.418657284020173	-5.09599620687348
135	TLCD1	53.1007756092932	3.79628474923284	14.9587279988514	4.72201758343816e-35	7.39998371979898e-33	36.1277173722996	57.6889576205245	3.79628474923284	15.8928513470584	5.10133341577177e-38	9.26337369467128e-36	38.2257010695687	13.7427566007098	3.79628474923284	2.9962376584903	0.00305771531183249	0.00919323604924144	-2.76059667844701	32.392935012342	3.79628474923284	6.99062462274388	3.47219438464549e-11	5.83287867259095e-10	5.40161813229106	-62.6347446683439	3.79628474923284	-9.00954671182574	1.20169286513693e-16	2.39084632646373e-15	4.53668799486217	-19.992168668057	3.79628474923284	-3.0286308317426	0.00276037538958424	0.00955193419747239	-3.34853802752491	-55.1111396383116	3.79628474923284	-7.88729715669506	1.59539676907474e-13	4.39791302125663e-12	2.73847582459082	-70.2537101934034	3.79628474923284	-9.79269865556568	6.2570050096286e-19	7.62301781790747e-18	5.29098364555279
136	HSPA4	16.7063685981585	7.65801947535215	11.5107947684096	3.74719317177852e-24	1.10879968350483e-22	36.0841882956979	12.0494637350709	7.65801947535215	7.92141902396921	1.2909885456637e-13	8.52708369653158e-13	16.8331454758469	-8.1483613401788	7.65801947535215	-4.38050942350613	1.85781794919055e-05	9.59956519364944e-05	1.64436769974763	13.5395644399099	7.65801947535215	7.30222923861182	5.57311033491369e-12	1.09547048507582e-10	12.4182875221102	-7.6811577425187	7.65801947535215	-3.70274864075305	0.000271732727129303	0.000889703033302582	-0.46883077109104	-4.99394219045225	7.65801947535215	-2.35626620312176	0.0193680084957577	0.0477624525094779	-3.2653562069738	-1.43965369083084	7.65801947535215	-0.685158909941492	0.493989165638166	0.612334603413221	-5.05390116812689	1.17865614384787	7.65801947535215	0.6110163326275	0.541840757801106	0.605455974725987	-5.14458549864991
137	TRIML2	109.33945366584	2.67273305134777	16.8892400193904	3.64244663565601e-41	1.38898631706349e-38	36.056459829831	110.980959330261	2.67273305134777	16.9838179043664	1.83680847923577e-41	6.18032029484036e-39	35.8846827804206	-72.8274199134337	2.67273305134777	-4.77674617550539	3.31546903135411e-06	2.00364319697258e-05	-2.7678931277741	99.5557334430388	2.67273305134777	13.3693834150397	5.35610923485795e-30	2.18835320167054e-27	21.9563556579552	-51.2195696102604	2.67273305134777	-3.76204840596938	0.000217868943153451	0.000731558764213525	-3.23506138299531	-54.5218490036619	2.67273305134777	-3.4265349011874	0.000733637754989156	0.00320214266199006	-3.72282888080761	-45.3208336767192	2.67273305134777	-2.96716134795916	0.003349373218837	0.0103503051387075	-3.91194329183235	-80.5096090504218	2.67273305134777	-4.60184763784875	7.19185525067906e-06	2.07502708872052e-05	-3.24474809187611
138	NOLC1	24.4800904397896	6.14142913861819	12.4167535172455	5.50492762047844e-27	2.58099885156858e-25	36.0112166489266	17.642668554982	6.14142913861819	8.51682442017214	2.98518705189276e-15	2.36335916080645e-14	17.1615432180142	-12.3745046843297	6.14142913861819	-4.8683489413675	2.19150822104214e-06	1.37374542732724e-05	2.17758277811729	26.6166042171158	6.14142913861819	11.0059496730194	1.35692801000508e-22	1.52188788573119e-20	25.1986411347198	1.19706393737052	6.14142913861819	0.443918541475675	0.657552461077171	0.734250869177437	-5.03326984589525	-6.27539774817002	6.14142913861819	-2.13898097738135	0.0335762182915928	0.0742963128154395	-3.70228896718427	2.8579898980688	6.14142913861819	1.04115600913172	0.298984380016633	0.419936317666087	-4.7458681273176	-0.980566662603383	6.14142913861819	-0.379318036494845	0.704829876712	0.754562398426473	-5.07588056402265
139	MRPS34	16.5582514447012	8.02459411742095	11.3625651324337	1.07922392029839e-23	2.95366546607981e-22	36.0084022444539	22.0309832550837	8.02459411742095	14.8718846283619	8.92050401136671e-35	1.03081379686904e-32	55.0479962127445	-6.47150630569327	8.02459411742095	-3.51191230321456	0.000543138575165283	0.00202262542314155	-0.6683676326357	15.7229241787597	8.02459411742095	8.55448982501767	2.34193415265394e-15	8.87143268422553e-14	18.6046394184517	-3.39361914753634	8.02459411742095	-1.72981848242667	0.0851124126292868	0.138346973640102	-4.17735821798094	-6.62505018497406	8.02459411742095	-3.14452394151825	0.0019011360327408	0.00702925940649242	-1.71137145690993	-7.00520698608121	8.02459411742095	-3.24489746201039	0.00136449654378297	0.004751854021576	-1.5204672306041	-3.81015545265443	8.02459411742095	-1.95024177284176	0.0524603914158735	0.0771595368729227	-3.87317048789112
140	EEF1E1	18.8982773363552	7.24047574032225	11.7080591433972	9.12718707698649e-25	2.95793258245681e-23	36.007073615645	18.8330674683425	7.24047574032225	11.2893936170729	1.81714013011051e-23	4.06811802122588e-22	33.2601983402684	-11.4151028472773	7.24047574032225	-5.47383247949339	1.23346262300598e-07	9.60572662163947e-07	4.87610555663916	12.9745154558483	7.24047574032225	6.19650649582266	2.9466398170759e-09	3.20433075164908e-08	7.41425090712211	-2.51463902696917	7.24047574032225	-1.14089737226689	0.255194738375556	0.346807769899782	-4.75195550802783	-4.44313365186246	7.24047574032225	-1.92017301836165	0.056172761252073	0.112384817895018	-3.91704599208463	1.8886316685871	7.24047574032225	0.840201819094079	0.401738082509286	0.527215167710054	-4.95224135308087	-3.87971230927354	7.24047574032225	-1.78996769904728	0.0748806238169438	0.106400985773921	-4.08330099185574
141	PDLIM7	-38.9095535282323	6.48245811136523	-13.2740202211515	1.07491171840462e-29	7.685618786593e-28	35.992616134207	-41.3626252577285	6.48245811136523	-13.0722436379648	4.68660102082296e-29	2.24329354302154e-27	32.9600568271943	-4.19796381400275	6.48245811136523	-1.4186417479083	0.157466139289798	0.252758893429955	-4.49512687557179	-25.3181764743064	6.48245811136523	-6.90055538800206	5.84075931450682e-11	9.33216292708911e-10	7.47807090249273	20.2067237466533	6.48245811136523	6.44099257919056	7.78052743159451e-10	7.03074516725444e-09	7.35360519574524	30.5414964810025	6.48245811136523	10.6393992816785	1.7907753056243e-21	1.58809841056915e-19	25.2692860334785	18.2894928554153	6.48245811136523	5.95992317535867	1.03526064995974e-08	1.22974180238676e-07	5.87713308679831	20.0316723078869	6.48245811136523	6.71206231319006	1.71177621237088e-10	9.13799340621691e-10	8.72006210606293
142	FZD3	-46.7822584163291	6.27515523565926	-14.0609174404707	3.39717236880074e-32	3.26585310076307e-30	35.8886674092768	-51.0466747209547	6.27515523565926	-14.7851821545185	1.68363515111972e-34	1.80007346998221e-32	37.1946261409283	-14.8489481715969	6.27515523565926	-4.6898879232124	4.88330150121986e-06	2.85170848259087e-05	1.90386582519216	-10.8898238062375	6.27515523565926	-2.994063659711	0.00307868771062561	0.00756609826198862	-2.36319837470747	18.80584307289	6.27515523565926	5.66921302216936	4.63563525905795e-08	3.1927554102121e-07	4.59155320121809	46.7215361927602	6.27515523565926	16.6923892430121	1.51721585191975e-40	7.23206222748416e-38	52.3074509041752	22.419668174786	6.27515523565926	7.17554994149922	1.17897313859155e-11	2.39139232366796e-10	10.2353919283957	30.5116188163118	6.27515523565926	10.4347664420355	7.47881827424062e-21	1.06019431297785e-19	24.4881737015961
143	FXYD5	45.7120327537411	6.15649793682266	11.9724108003273	1.36493842502161e-25	5.03706309104749e-24	35.4798140936551	51.4694005169178	6.15649793682266	13.3347852707012	6.89645618414809e-30	3.77490233237579e-28	41.9402229756636	-51.6105612775659	6.15649793682266	-7.85501485985435	1.9483571624204e-13	3.38741731581905e-12	9.32952117694001	49.4702941716765	6.15649793682266	10.6811910503115	1.33605559186762e-21	1.31762723887635e-19	25.5988815019436	-17.6357386447012	6.15649793682266	-3.03394621180051	0.00271420566046654	0.00694797779273601	-2.30298175608658	-16.9441722366616	6.15649793682266	-2.60077166683889	0.00995365077684668	0.0276651518190296	-3.14000761456855	-7.12448199708727	6.15649793682266	-1.07375984554855	0.284146185012264	0.404206958037839	-4.67888880862824	5.82095029082509	6.15649793682266	1.08170013258771	0.28060985078764	0.344107266910774	-4.74212211702429
144	OLFML3	55.9342616604067	4.97448851871658	12.8424865794957	2.4993870600624e-28	1.48150196720797e-26	35.2289902378635	55.9675107763234	4.97448851871658	12.4276983812278	5.08516633466301e-27	1.78448781805352e-25	32.5808087581918	6.24563360910124	4.97448851871658	1.09192948853723	0.276098580116735	0.392710152497258	-4.69565811549069	53.9460753409155	4.97448851871658	10.3933979836106	9.97445627444474e-21	8.77752152151137e-19	21.1121262789978	-79.2150111903657	4.97448851871658	-9.34477558421077	1.29285644102112e-17	2.87189857966632e-16	8.59584316765539	-42.3096339830457	4.97448851871658	-4.70868050279522	4.49284512365119e-06	4.34105981541973e-05	-0.944299204754203	-54.1594473614854	4.97448851871658	-5.98899241762243	8.8869210874193e-09	1.06792413067308e-07	1.12344817716848	-69.377632898652	4.97448851871658	-7.98063153376635	8.93062205915047e-14	6.81767124451013e-13	5.33263646412207
145	KIF5B	-23.3961393955544	7.65747243612681	-11.8727471477951	2.79669860074602e-25	1.00245465413284e-23	35.1921162544397	-12.7138670234717	7.65747243612681	-6.35973692781699	1.21562345659631e-09	4.95606997272336e-09	9.00508314422006	6.29112767074637	7.65747243612681	3.17708458181758	0.00170871592152879	0.00552507352806368	-1.47833760182883	-0.9030410860811	7.65747243612681	-0.391744606511502	0.695638872839759	0.762647710902421	-5.20488459670164	7.81832950721804	7.65747243612681	3.50526066944223	0.000556124798516164	0.00169609909224871	-0.824057307721752	2.86112389508104	7.65747243612681	1.24637603496707	0.213996419890735	0.321106904977703	-4.69147667199305	2.67988249695644	7.65747243612681	1.16145907699809	0.246756146998569	0.362072413819813	-4.76419425527382	20.1894523297438	7.65747243612681	9.81727812022931	5.29101715054309e-19	6.48064627432687e-18	24.3543262299626
146	GNAS	-18.8573361577586	10.195905754211	-10.8302315133425	4.68806915837193e-22	1.04954033604256e-20	35.1864244114462	-22.6733250091661	10.195905754211	-12.4736016642636	3.6457510916863e-27	1.30459676730295e-25	44.4571916792247	6.73009658665598	10.195905754211	4.0287552660551	7.80364279918447e-05	0.000352104011385779	1.30606423324437	-4.78896924829408	10.195905754211	-2.36576908107611	0.0188907080062261	0.037005085546443	-3.19815054281273	16.7515191514039	10.195905754211	9.06179082570555	8.50867789402296e-17	1.71070782262957e-15	24.4972926819981	7.91776767365505	10.195905754211	4.15027096337831	4.80228645734309e-05	0.00032411892077879	1.61547197017552	9.43722647650424	10.195905754211	4.98267294714781	1.29676225915625e-06	9.81148164335151e-06	4.63760351648936	17.98847333126	10.195905754211	10.0813051689737	8.65435061532933e-20	1.13930691644842e-18	30.5688162536365
147	TXLNG	32.6858070896402	5.58962065929355	12.5258328476578	2.49605524249125e-27	1.22553098601287e-25	35.1574722905076	32.7400791524412	5.58962065929355	12.4978693735439	3.05740985003365e-27	1.10336809729921e-25	34.935542144516	-20.3967847338166	5.58962065929355	-5.49337689728418	1.11963138362192e-07	8.77300207440734e-07	3.0530573756732	27.5966687449835	5.58962065929355	8.49502371895526	3.43459981555701e-15	1.27157999643923e-13	14.1011135287861	-2.55298233795516	5.58962065929355	-0.671354312656116	0.502722822116656	0.596963782957707	-4.89317255601468	-3.87581096301648	5.58962065929355	-0.901715795030418	0.368227127963837	0.487052647000381	-4.74688335697568	-15.5733552394201	5.58962065929355	-3.6667590019388	0.000310313276486128	0.00129137282029876	-1.60364438780951	12.6437897829016	5.58962065929355	3.79249292516673	0.000194303987942019	0.000445994707475261	-0.696068263959448
148	DKC1	20.7933060417625	6.80066395429635	11.8032415390156	4.60911225569303e-25	1.58820012666049e-23	35.0774622177996	17.7821101676039	6.80066395429635	9.66532907851928	1.48830679203453e-18	1.78098637038441e-17	23.7836119727614	-11.105844306437	6.80066395429635	-4.92955600348332	1.65659594760618e-06	1.06170631039858e-05	2.81515458989254	14.7147001443156	6.80066395429635	6.54783486036513	4.30371318767114e-10	5.63968830091155e-09	8.26960234581578	-4.84440806389802	6.80066395429635	-1.99434460909834	0.0473904868332731	0.0840668583303837	-3.82574504353703	-9.94188862531314	6.80066395429635	-3.76821685062122	0.000212886238667489	0.00113751451207663	-0.762143182526617	5.79464178977764	6.80066395429635	2.36940142331271	0.0187110215258254	0.0442169151529525	-3.29231770920746	-11.6237656679944	6.80066395429635	-4.82885801200431	2.62158516850225e-06	8.10346779996374e-06	2.23766048407021
149	SLC1A5	32.3820650513101	5.55166056931258	12.628172608557	1.18741111411286e-27	6.20273202988636e-26	35.0280823856727	25.0936925170402	5.55166056931258	9.29353940127431	1.82165772588799e-17	1.90491447752821e-16	19.3898070337849	-14.4857334275899	5.55166056931258	-4.08102803633461	6.34132421648687e-05	0.000292873431718247	-0.370107755886987	24.7950615058403	5.55166056931258	7.76631355685778	3.36672208887467e-13	8.75347743107414e-12	11.1580464719403	-19.4763055624949	5.55166056931258	-5.12763234089089	6.58313965502939e-07	3.72274432296274e-06	1.73977645611822	-23.4365012328605	5.55166056931258	-5.42887463221048	1.53978042549592e-07	2.24682245761139e-06	1.66278059697129	16.0331751137708	5.55166056931258	4.58911771800364	7.60248029709298e-06	4.802450281543e-05	0.853263610651811	-67.713573423901	5.55166056931258	-14.550527087632	9.39716361570303e-34	3.28757039032546e-32	22.5812482407547
150	PHB	14.5315897575709	8.3801078736862	11.073159798637	8.43360234987297e-23	2.08381017024939e-21	35.0016422034723	13.551470713912	8.3801078736862	9.98773788830347	1.64706985322574e-19	2.23252122285574e-18	28.5623549605614	-6.21173435576839	8.3801078736862	-3.84585463209077	0.000158710264144955	0.000665490245485825	0.345278215542718	12.3414505604913	8.3801078736862	7.41942119539864	2.76824731113117e-12	5.86458319247049e-11	13.7684929019943	-4.69894265271919	8.3801078736862	-2.66030475633366	0.00840158108660936	0.0187906329679005	-2.63588756952649	-4.46386430320701	8.3801078736862	-2.44264095901864	0.0153956271143048	0.039632307422963	-3.06387033171399	-0.728796025408663	8.3801078736862	-0.402373453158999	0.687813019578398	0.778559517930222	-5.26692395558565	-7.54661176868129	8.3801078736862	-4.28596482783264	2.75677482577715e-05	7.28180651278933e-05	1.48557132628846
151	RCN1	-35.6673541590821	6.99736835757498	-12.4605721269122	4.0069688963958e-27	1.91798009099448e-25	34.8634995318769	-54.9907899832189	6.99736835757498	-15.989109235544	2.52791688486669e-38	5.09656911730292e-36	43.1295633439209	17.0218112191462	6.99736835757498	6.49208702777143	5.86620737272506e-10	6.49027198684475e-09	9.30054907255064	-12.9761885475138	6.99736835757498	-3.8820915696351	0.000138163538515379	0.000484101341689412	-0.255282329163028	9.23632255100792	6.99736835757498	2.8554973392827	0.00472228615243988	0.0112924234080084	-2.41730834260214	23.2710327814021	6.99736835757498	8.08896749930066	4.5342255825562e-14	2.0262320572048e-12	15.1721902279222	13.8338348410288	6.99736835757498	4.63143506558115	6.31832609663323e-06	4.05539106248991e-05	2.10607005719781	-11.2865576786307	6.99736835757498	-3.43100656709224	0.000722278325627312	0.00151473218060063	-1.26236559908507
152	TBRG4	26.8278267947672	5.85447988721972	12.370069580515	7.72019025024344e-27	3.5327590585114e-25	34.845282478932	28.6743437026838	5.85447988721972	12.8118273227063	3.12417126279159e-28	1.35224229141858e-26	36.0580460037936	-13.6046942509695	5.85447988721972	-4.71286875250108	4.4100232551647e-06	2.60541032482227e-05	1.43724553896566	14.0960553967845	5.85447988721972	5.06507034932701	8.83584276966673e-07	5.42868105719588e-06	2.55840050561221	-4.51741134636236	5.85447988721972	-1.51296286536273	0.131772555106192	0.20022287560298	-4.36976117765896	-9.65733488260553	5.85447988721972	-2.82684057363266	0.00514909262286066	0.016041835404555	-2.85928731719195	-5.00365515149753	5.85447988721972	-1.52868586585022	0.127827144339296	0.214608531147863	-4.35321723044514	0.152899568029212	5.85447988721972	0.052367988702282	0.958284597849741	0.96673507931226	-5.07957837165425
153	PLSCR1	44.7764078652699	4.5606446070582	13.2963842836779	9.12940087369804e-30	6.61014848070289e-28	34.7988075857751	42.8562625356046	4.5606446070582	12.2902850213782	1.37546725830292e-26	4.62804277499572e-25	29.8339440496847	20.0949164517103	4.5606446070582	4.69708840423562	4.7299761858695e-06	2.77207620729237e-05	0.93024891564671	30.4529071834822	4.5606446070582	6.94280551401798	4.57863079762425e-11	7.46147241094322e-10	6.76090892172378	-36.082220519043	4.5606446070582	-5.86684428119304	1.6822360314505e-08	1.24723138041437e-07	1.2367929717525	-8.98433353247475	4.5606446070582	-1.54835980723539	0.123021324594131	0.208498363460276	-4.36426829780369	-20.5713539307798	4.5606446070582	-3.39438302664239	0.000820368147214878	0.00304438259417703	-2.6099260777765	-100.296331966298	4.5606446070582	-13.197828231426	1.87477703077327e-29	4.88552374306291e-28	10.8263328027985
154	HELLS	27.6216809843647	7.51289884247006	11.2507129542557	2.39257805740144e-23	6.27777361850287e-22	34.7900799559337	20.2539711094236	7.51289884247006	7.93590805106038	1.17982534421127e-13	7.819931597785e-13	17.0294912971892	-10.6424325672101	7.51289884247006	-3.27055734146446	0.00125195811571599	0.00419108396759485	-1.37269139755331	28.0357391718608	7.51289884247006	9.14472638648267	4.91028199415163e-17	2.42127698332305e-15	20.9940285655544	-8.64803038252952	7.51289884247006	-2.45031064653135	0.0150805258645459	0.0313560915831343	-3.09737629286032	1.84061315040182	7.51289884247006	0.498570412974838	0.618596901963024	0.714462247194042	-5.11351524598487	10.5990824896854	7.51289884247006	3.01172549074976	0.00291206141849016	0.00912961979378662	-2.03223954543627	-12.6950358723169	7.51289884247006	-3.58138266716673	0.000423488742963091	0.000920173071129678	-0.768027250755088
155	FAM98A	26.6803208397565	5.43300644172061	12.7206422283134	6.06415407062376e-28	3.35139722550415e-26	34.7423524978508	26.078080782926	5.43300644172061	11.8289278082961	3.83232673862979e-25	1.05898110845229e-23	29.6846831367967	-8.77421313634396	5.43300644172061	-3.19166427108625	0.00162854377687201	0.00530180444149568	-2.07388719713553	20.2753600462954	5.43300644172061	7.6157188547893	8.45686507906878e-13	2.05406659245322e-11	10.0887978624817	1.69722017856849	5.43300644172061	0.583245643749593	0.560345445156673	0.650071178642363	-4.9244834869461	-25.1588249341638	5.43300644172061	-6.86390393084938	7.2090802241554e-11	1.98249706164273e-09	4.40283313030199	6.46244793409448	5.43300644172061	2.19151524647031	0.0294994133458007	0.0647741436998004	-3.66595032994204	-5.41318693970142	5.43300644172061	-1.87188601640588	0.0625940388503098	0.0904592981869056	-4.02100848169698
156	PYCARD	59.5998226813397	4.13110315981878	13.805839615703	2.19990809063036e-31	1.96616785600088e-29	34.4992559277706	68.1536163680336	4.13110315981878	15.7521476424993	1.42463795983782e-37	2.46937246371888e-35	41.3143043805836	7.40521017673598	4.13110315981878	1.22691168860671	0.22121123909607	0.330459202828289	-4.56398501868898	52.7596243673259	4.13110315981878	9.92946274642315	2.45653924697488e-19	1.80146211444825e-17	15.7304313693172	-72.820672583478	4.13110315981878	-8.71578178622188	8.23822017157988e-16	1.48886633116704e-14	5.12043351976609	-60.4933078805252	4.13110315981878	-6.68432676150694	2.00214694809878e-10	5.24131832637302e-09	0.982842838978319	-40.540123636839	4.13110315981878	-4.8460529158751	2.42513872880625e-06	1.72427514341476e-05	-1.16552454356307	-79.0707400126646	4.13110315981878	-8.91243743139099	2.27769813066426e-16	2.18781415741386e-15	4.64873731912784
157	PAK1IP1	30.7603223961063	5.91088029824111	12.1989665450379	2.66205948822735e-26	1.11145841406281e-24	34.4771910746789	27.2810694473242	5.91088029824111	10.4335486994631	7.54251834830151e-21	1.19180124177582e-19	25.6079869472619	-18.9794865341426	5.91088029824111	-5.42935227097735	1.5361663755431e-07	1.17944586149081e-06	3.25256269210852	18.6284135470179	5.91088029824111	5.81101709779188	2.24530204185261e-08	1.96378099073348e-07	4.9333203754672	-0.780059970929033	5.91088029824111	-0.228679417233468	0.819337664671771	0.86676742036666	-5.07221509223913	-10.5655598865895	5.91088029824111	-2.64383814477395	0.00880745799647864	0.0250453192840456	-3.10589429530162	-0.808725803832731	5.91088029824111	-0.218095747204578	0.827563472800819	0.883970693635982	-5.02393623949102	-0.363776868341931	5.91088029824111	-0.108027297149492	0.914075807228671	0.932580686229912	-5.09310751691276
158	RRS1	31.115336325016	5.20450239899776	12.8148455363341	3.05630504728874e-28	1.75699144427051e-26	34.4002726675908	35.2300904861717	5.20450239899776	14.2940618215431	6.15509542068474e-33	5.29430764004763e-31	40.062402192366	-11.5207603876504	5.20450239899776	-3.49443698121362	0.000577880569601829	0.0021311907531415	-1.65072580748422	20.3109339475333	5.20450239899776	6.56193385214482	3.97841613655335e-10	5.28870506969898e-09	6.36563678926871	-8.83896280669825	5.20450239899776	-2.51540327031642	0.0126284174799012	0.0269080081896201	-3.30330329672576	-19.1448087547891	5.20450239899776	-4.97586268081778	1.33826687721493e-06	1.51148370051624e-05	0.723540204377246	0.294503254604128	5.20450239899776	0.0773020237745924	0.938455900952892	0.959164388079785	-4.93992050426859	-35.8107539510587	5.20450239899776	-9.22250249583708	2.92676956927919e-17	3.04107573774332e-16	11.1895728932043
159	TUBB2A	38.6800078167297	7.57748484050612	11.1470861283581	4.99416603427265e-23	1.27245566663873e-21	34.3876685460989	31.357702853958	7.57748484050612	8.5990109674147	1.75677715609963e-15	1.44171669051505e-14	20.3226838139316	-29.4946541045082	7.57748484050612	-5.71681304908621	3.63929264012924e-08	3.08396354096877e-07	5.42647543710921	26.8457106606501	7.57748484050612	6.18226635205051	3.18102289195034e-09	3.43310395131245e-08	8.11686882394119	8.91940111595853	7.57748484050612	1.91156767847604	0.0572748882242408	0.0988719965724031	-3.92636393154296	2.5950547672278	7.57748484050612	0.519376698972657	0.604037756300941	0.702001120362623	-5.1421251030629	-45.6324433657339	7.57748484050612	-7.39569776738205	3.19110426402971e-12	7.20044039063114e-11	9.72898384379863	45.645023271823	7.57748484050612	11.6127802272956	1.8066272353984e-24	3.39931177186804e-23	34.8808063235323
160	SH3BGRL3	-30.7278951671161	8.38600350032467	-11.4339025822078	6.489082939551e-24	1.82395844787379e-22	34.3841824034917	-34.9865701640315	8.38600350032467	-11.9606764243355	1.48531235550398e-25	4.3236573401948e-24	35.5141209067617	2.70907856236634	8.38600350032467	1.03705741784563	0.300885875572364	0.420182423895001	-5.02369243543242	-2.90536010563854	8.38600350032467	-0.955411466471362	0.340453550339951	0.430173251147452	-4.9909431514902	37.3048423791955	8.38600350032467	14.30849739812	5.53723963841094e-33	3.29927195121985e-31	50.0565978479384	14.7092991584279	8.38600350032467	5.3318477339355	2.47436301119404e-07	3.43669866851186e-06	5.29243202344069	1.16553834522373	8.38600350032467	0.391090154571017	0.696121814649053	0.785135912411039	-5.30204292723768	36.8345126725727	8.38600350032467	14.7024680875661	3.08638727926565e-34	1.14637241801296e-32	53.0930342600771
161	TCP1	14.1430166927207	7.97641166260472	11.0891406565146	7.53104409435578e-23	1.86887515052994e-21	34.2988060737988	10.1718192331262	7.97641166260472	7.65134337728551	6.80713058905039e-13	4.10942342684625e-12	15.8286943800391	-11.6287556553382	7.97641166260472	-7.16300160087443	1.26928665638172e-11	1.75158496369202e-10	12.1468448844866	12.8852057852049	7.97641166260472	7.89851737306288	1.48818474112915e-13	4.10236950325723e-12	15.3221711947347	3.52170854819261	7.97641166260472	2.08476189864618	0.0382837042545244	0.0699943403182296	-3.66984156899496	-6.61910394306318	7.97641166260472	-3.52296255415013	0.000522191776968365	0.002411737556931	-0.893510568109044	3.08243836957655	7.97641166260472	1.76963246121717	0.078220273617224	0.143957517725393	-4.11985186429132	4.98739055141252	7.97641166260472	3.07097331384274	0.00241179175237518	0.00460462243777905	-1.76146814795857
162	SLC25A4	24.1200784191351	6.81338081614104	11.5376178115189	3.09338039504363e-24	9.21569576023414e-23	34.2763006618372	20.3908005366325	6.81338081614104	9.35966528945438	1.17007259007109e-17	1.25686670708105e-16	22.7217508537077	-11.8722845059498	6.81338081614104	-4.23380288615192	3.41787121958515e-05	0.000167741084307397	0.764440595318121	17.7514881629818	6.81338081614104	6.64520614093936	2.49565236595152e-10	3.4480994041649e-09	8.84643846627102	7.21581134195848	6.81338081614104	2.47817318117031	0.0139834243042173	0.0293793157098706	-3.10368974976196	-2.73147424001935	6.81338081614104	-0.866689231965739	0.387088308885917	0.506495511112306	-4.8715050210343	-32.7719675763944	6.81338081614104	-9.0661764777519	8.26531505089405e-17	4.07565535268224e-15	13.8645636693828	24.8135257325251	6.81338081614104	9.54101052735479	3.45334701867421e-18	3.91927479103501e-17	21.0782305140219
163	MRPS12	21.2214339950578	6.80619918941509	11.5833803687603	2.22980095750214e-24	6.80237945435318e-23	34.1517073616634	19.5161533173214	6.80619918941509	10.2526509274693	2.64972742487546e-20	3.94698980997073e-19	26.8590380393221	-6.27638478558685	6.80619918941509	-2.69582695234187	0.00758284499197969	0.0200202507981186	-2.67396397092468	19.5438975826069	6.80619918941509	8.4068503067605	6.04583990080001e-15	2.12813564508161e-13	15.6920900740454	-4.75335182610274	6.80619918941509	-1.8881693454481	0.0603635297170477	0.10354126955791	-3.96052483628558	-10.2091717817374	6.80619918941509	-3.71879552531373	0.00025603180266334	0.0013288787095416	-0.847164495816898	-10.6571549442003	6.80619918941509	-3.90154425188312	0.00012820129413514	0.000591141799639661	-0.42404808871426	-6.46016259288787	6.80619918941509	-2.56686892577793	0.010948232023211	0.0185497296127863	-2.9607667874307
164	TSPAN3	-42.2746761067369	6.66366002765271	-12.9221620681372	1.39922935378135e-28	8.60601279960143e-27	34.0988234796479	-58.62097644323	6.66366002765271	-15.6951275067762	2.16048798059507e-37	3.53085464257251e-35	39.9601546167618	13.0471473277965	6.66366002765271	4.57354632296584	8.13551082228468e-06	4.53779833285893e-05	2.17109007644369	-12.3768006384304	6.66366002765271	-3.39159819732204	0.000828314623819954	0.00236720442080946	-1.48851395571241	11.126439221595	6.66366002765271	3.31274920831069	0.00108549787020665	0.00306378883421001	-1.50682618203863	27.0979717437995	6.66366002765271	8.82352736124075	4.07949488928428e-16	2.25456142673489e-14	17.8567292305706	3.7574667467322	6.66366002765271	1.09669023379358	0.274016111063346	0.392677478462318	-4.75531469147563	24.8473049858731	6.66366002765271	8.27622118225331	1.39005822364607e-14	1.1490076646323e-13	15.8037715079983
165	TMEM158	53.4214687415609	4.29645173173542	13.4911310602634	2.19982798558579e-30	1.73558842448975e-28	34.0495296778855	58.509212643103	4.29645173173542	14.8345947194586	1.17227245341961e-34	1.30201911331266e-32	39.1720370379869	-59.1442956413777	4.29645173173542	-8.02301025881706	6.85435225746405e-14	1.24269080547367e-12	4.64567305657394	57.0174657487281	4.29645173173542	12.3048131826112	1.23821521531207e-26	2.95107959649378e-24	25.1918087123116	22.6193662470098	4.29645173173542	4.1098672775419	5.65045578514336e-05	0.000219345823488429	-0.882277007964089	-33.4294605481708	4.29645173173542	-4.72432132087899	4.19100262092625e-06	4.08738874538758e-05	-0.866463272454399	-49.694847364566	4.29645173173542	-6.53430150084628	4.64049192071106e-10	7.05009662323167e-09	1.64401031950332	68.6729813967357	4.29645173173542	16.3129411685069	2.38963848918104e-39	1.2715099681968e-37	41.6937833411159
166	DPEP3	77.311412555582	3.21384923262716	15.0809908788794	1.92878852898036e-35	3.24490305463755e-33	33.9410193635836	79.5976470267405	3.21384923262716	15.3395303388191	2.90730893478855e-36	4.21007774860519e-34	34.245645204487	-9.66509528804917	3.21384923262716	-1.15737361034158	0.248416969138646	0.362173872087832	-4.57651257101589	67.0199606036232	3.21384923262716	11.1509902435929	4.85775230675775e-23	5.97555767626975e-21	17.4655558858569	-73.4080241621777	3.21384923262716	-6.70278821729602	1.80393169537764e-10	1.79608168800002e-09	-0.148288880739845	-48.9290380020876	3.21384923262716	-4.36942024270328	1.94648940018075e-05	0.000152938452871345	-2.65897429124092	-29.5240146215254	3.21384923262716	-2.7867003774261	0.00580603676442248	0.0165555983511947	-3.78400520300495	-35.9214632848901	3.21384923262716	-3.47882320969107	0.000610673923348417	0.00129516308548496	-3.22405708230458
167	EIF3K	14.3573039738653	9.19992462497704	10.6922401365338	1.23642172330979e-21	2.66377862799699e-20	33.8494631086531	13.2378938077764	9.19992462497704	9.50721364213726	4.3381781280747e-18	4.8943548111612e-17	26.7452973149478	-10.4422224170602	9.19992462497704	-6.46957385634017	6.64469606987996e-10	7.28565799336987e-09	10.3898704112324	16.4270040244958	9.19992462497704	10.2205609115658	3.30891375060138e-20	2.68467895793473e-18	29.1998241551315	-2.31683718147919	9.19992462497704	-1.33995654673108	0.18168827748372	0.261975534965182	-4.71998113987117	-9.34244281733612	9.19992462497704	-5.07381683229426	8.4809905154985e-07	1.02021589376764e-05	4.27907614754664	-5.97843208408733	9.19992462497704	-3.32017057995378	0.00105844173458724	0.00380413868792899	-1.07459844563333	-1.42687884874802	9.19992462497704	-0.844364973982683	0.399413565286536	0.466635129378878	-5.18033572519138
168	ATP5MC1	21.0641309079831	8.15997880785489	10.9081339984705	2.70750528110002e-22	6.24472992253714e-21	33.8296774872079	23.3417244276993	8.15997880785489	11.7752264902447	5.63638012457279e-25	1.52796655509746e-23	38.3212006475119	-20.1979640456491	8.15997880785489	-7.83849657971842	2.15779831474887e-13	3.71206206326722e-12	15.0429720563616	16.6037569655317	8.15997880785489	6.7637883005925	1.27667082808244e-10	1.8894067623885e-09	10.7469423636383	-2.61917606716389	8.15997880785489	-0.993994069786133	0.321354466003468	0.417191907748488	-4.94379302891553	-4.24965257925134	8.15997880785489	-1.52275529054301	0.129304310637536	0.216548281905053	-4.41708462538971	-0.84237420403724	8.15997880785489	-0.306021197164309	0.759887630430825	0.834649412385986	-5.25489152056109	-5.72903263434796	8.15997880785489	-2.20288882509391	0.0286755468320078	0.0447175921153447	-3.47840306764316
169	MT1E	94.1388212470191	2.98286322712908	14.7712956264499	1.86394846210118e-34	2.60043541541921e-32	33.7343035873609	94.1853413232204	2.98286322712908	14.6171737855447	5.76619314126512e-34	5.73610865531069e-32	32.853794507957	-47.0356698070773	2.98286322712908	-3.60276100506304	0.000391974193270283	0.00150982652222627	-3.1124640908647	87.0157802029409	2.98286322712908	11.7766678861902	5.57834471551521e-25	9.38474463904323e-23	20.0311665556818	-18.4634519645667	2.98286322712908	-1.60237017748124	0.110556824216136	0.172570619324955	-4.38180580630558	-36.2957402503717	2.98286322712908	-2.34321087214291	0.0200410290093062	0.049073067608404	-4.16087227047282	-30.658994919873	2.98286322712908	-1.88079051771692	0.0613659317645866	0.118365580743023	-4.37105071977039	-29.3277858107018	2.98286322712908	-2.35956605552603	0.0192010776593268	0.0310386287688981	-3.98583414790922
170	BEX4	-26.0039336747043	7.45441936093545	-11.6630298592861	1.26049614159285e-24	4.0167342227917e-23	33.7261474473582	-6.30723767999528	7.45441936093545	-2.93983145781332	0.00364655721402317	0.00620598252431198	-2.01240142094162	0.802351894475731	7.45441936093545	0.337799636366505	0.735847119933769	0.813420722006215	-5.27181501396486	-5.50333387981739	7.45441936093545	-2.11811729867578	0.035325120847996	0.0635444391628718	-3.62650772557967	13.2698813171421	7.45441936093545	5.25997007709853	3.50253252516948e-07	2.0647803258574e-06	4.25339269079896	13.6781981913942	7.45441936093545	5.32085393474914	2.60999875247765e-07	3.60029107720737e-06	4.37204667440118	-8.00654574102489	7.45441936093545	-2.77258744956413	0.00605451692131498	0.0171190493276924	-2.58719644514611	26.029885052342	7.45441936093545	11.0125910684699	1.29467720222062e-22	2.09789053730933e-21	29.4621274602224
171	N4BP2L2	-22.8863131140785	6.88132113718375	-12.0718642635019	6.66449446972158e-26	2.6290281632281e-24	33.7183746399437	-25.5527904127794	6.88132113718375	-12.4676574944061	3.80632166403528e-27	1.3523080694585e-25	33.6273939643921	-1.14671296374167	6.88132113718375	-0.588132761255571	0.557066725506709	0.666685149052909	-5.1430101641096	-4.68503718054393	6.88132113718375	-2.03099018671229	0.0434994120591019	0.0761839059945079	-3.7775894931103	15.0607827708802	6.88132113718375	7.1773496799004	1.16655086076456e-11	1.36449753120187e-10	10.7630694961855	10.8511989389431	6.88132113718375	5.03385568125198	1.02234562358218e-06	1.19832314895288e-05	3.09141737758122	6.86213628417543	6.88132113718375	3.06770829960804	0.00243715360927299	0.00783615438169842	-2.02384077355792	12.635212129774	6.88132113718375	6.14042201169612	3.98064207129921e-09	1.79285611400248e-08	7.03729052659042
172	CLDN7	60.2957308423585	6.03624029002644	11.629085548887	1.60752588096916e-24	4.98376587487457e-23	33.6948935465807	57.292069298709	6.03624029002644	10.7968279295373	5.93041184420962e-22	1.08376855427729e-20	29.1777143258286	44.2954283603806	6.03624029002644	7.41310950142761	2.87501900860916e-12	4.32197338482113e-11	12.2567284519089	48.2227928913282	6.03624029002644	7.45241081884246	2.27076753978497e-12	4.94811060097906e-11	11.6410145138954	-27.3200956939775	6.03624029002644	-3.12755641478177	0.00200917119998887	0.00532428040951417	-2.31749824022226	-27.9500983019764	6.03624029002644	-2.62353133267268	0.00933223564832486	0.0262634134850766	-3.33203126888876	-57.549340557948	6.03624029002644	-4.93369947894932	1.62536104521953e-06	1.19884786314065e-05	-0.124056417411021	5.52103427210503	6.03624029002644	0.734736243827841	0.4633088896999	0.529866409893717	-4.9311225937672
173	MCRIP1	-24.4693100252765	6.92621410842074	-12.1589441758441	3.55459461647423e-26	1.46275404361386e-24	33.6713114834354	-12.8697549639297	6.92621410842074	-6.44319136899728	7.68676204291034e-10	3.18957409397513e-09	8.63175953660563	0.435106367637778	6.92621410842074	0.215671901053596	0.82945004629416	0.882935566167785	-5.25884613775637	-2.79106495141024	6.92621410842074	-1.19518944928686	0.233343058382634	0.315835848071147	-4.68274573841844	10.3611413676246	6.92621410842074	4.79190286135419	3.09718769644445e-06	1.55881334128133e-05	2.5088573496011	13.8722654829076	6.92621410842074	6.53160609034329	4.71059633499603e-10	1.14172080661768e-08	8.53404455864674	7.03651669466654	6.92621410842074	3.11340065059941	0.00210361513925581	0.00692329033172797	-1.89158588130198	18.6713627175288	6.92621410842074	9.07727652135799	7.67981459970655e-17	7.70000692556029e-16	19.3387969727675
174	HSPD1	16.7697334803524	9.80648365625507	10.5386947931649	3.62238593296309e-21	7.19446095019058e-20	33.6433264433771	11.1603295115643	9.80648365625507	6.66912873957156	2.18127758733862e-10	9.70965587515712e-10	12.1446579700579	-7.13631352281606	9.80648365625507	-3.88230599082544	0.00013804983005248	0.000588189964916338	0.717188378896437	15.1149454360304	9.80648365625507	8.12615193615873	3.58924415589219e-14	1.1127629578159e-12	18.9477887986631	-8.74190687667276	9.80648365625507	-4.28146973753417	2.80853694216406e-05	0.000116285423881132	1.87822817882414	-8.40613051748558	9.80648365625507	-3.92508883993278	0.000117054598111036	0.000686016702044184	0.68455146443611	-1.11267362669039	9.80648365625507	-0.540088288494385	0.589700808140391	0.697856340656467	-5.39116060585921	-17.4556887136274	9.80648365625507	-8.42149051958466	5.50509193796628e-15	4.71747204272167e-14	19.6623287149594
175	CHEK2	41.590666335396	4.7865022751993	12.9297149771214	1.32433125451724e-28	8.27887953643562e-27	33.5087603070879	46.2476964995811	4.7865022751993	14.0794349681186	2.96621708895311e-32	2.27741768440426e-30	37.4075874915601	-7.24240251652168	4.7865022751993	-1.65592207404052	0.0992111907862378	0.17391603165715	-4.24469519463941	27.2272018660143	4.7865022751993	6.70331310863963	1.79858803815621e-10	2.56876993214819e-09	6.42262959829039	-32.6365019098458	4.7865022751993	-5.99575811233317	8.57610500505142e-09	6.63357953061449e-08	2.10006828808966	-20.8510465083507	4.7865022751993	-3.57483259802364	0.000433611590757004	0.00206172759694935	-2.37948463388232	18.1431826158239	4.7865022751993	4.06078057232345	6.87371045538614e-05	0.00034189238091138	-0.777582531150054	-78.076302906304	4.7865022751993	-12.7277986643692	5.75669943523025e-28	1.35229243406641e-26	14.338872477865
176	NPM1	16.0122719139019	10.8413756223092	10.3721206696865	1.15651293347271e-20	2.14780973359218e-19	33.4829625450613	11.8959260020391	10.8413756223092	7.34111244293565	4.42150255676354e-12	2.42250906366738e-11	15.8978578295542	-6.84025739724187	10.8413756223092	-4.09441660912318	6.0111298721811e-05	0.000278861823754062	1.53269105019076	16.305641737806	10.8413756223092	9.61354163305361	2.1143861417118e-18	1.31459660115125e-16	28.3022425192444	-4.93648548760017	10.8413756223092	-2.75678825411281	0.00634410143912697	0.0146678497299136	-2.36727491382135	-7.83772450811329	10.8413756223092	-4.04399224871606	7.34717642345738e-05	0.000461822518045893	1.25571532921253	1.32654782011051	10.8413756223092	0.725301744374033	0.469063631866701	0.590069050863762	-5.44955592982872	-18.1557401108847	10.8413756223092	-9.71928765386933	1.03153969545738e-18	1.22925147042004e-17	28.1614111994117
177	CNN3	-30.4947151330257	7.60853891583071	-11.6733226430227	1.17085561287893e-24	3.75198549337114e-23	33.4435919225607	-38.0954127734971	7.60853891583071	-13.4619397071125	2.72315799847947e-30	1.61414132137851e-28	40.0031317950807	-0.532312657525372	7.60853891583071	-0.208310062380099	0.835186081958299	0.886693214834255	-5.35140439088944	-11.738313348381	7.60853891583071	-3.79958493620546	0.000189171985536622	0.000641413015571713	-0.244111088841303	4.39493745662101	7.60853891583071	1.46781350998265	0.143631111765319	0.214593172077217	-4.46412633035035	22.065804158747	7.60853891583071	8.47872762391611	3.81377279178647e-15	1.9220070809708e-13	18.1258081530293	7.45173789925598	7.60853891583071	2.55997907903206	0.0111609086826383	0.0286408244345855	-2.87847095572994	8.26288660954824	7.60853891583071	2.99886711609805	0.0030325244905628	0.0056937600807547	-1.96079472258732
178	MYSM1	32.982098922243	5.08957188409455	12.6784697392915	8.23946175872505e-28	4.44620011885918e-26	33.4305627614725	28.6122275618998	5.08957188409455	10.5193390047257	4.14669142349459e-21	6.7003036560421e-20	23.4168797549211	18.456716322477	5.08957188409455	5.99467710319789	8.62504224520044e-09	8.12102743087185e-08	5.11377009812393	28.5985100859454	5.08957188409455	8.79438787501024	4.93535525670799e-16	2.1067337364455e-14	13.7231188574907	-17.4579496240769	5.08957188409455	-4.32469519687655	2.34708151504264e-05	9.89337234048924e-05	-0.550653510215573	-25.8611403645443	5.08957188409455	-5.73853293612976	3.25735185120042e-08	5.36174175219178e-07	1.65638309091202	-8.16179753159697	5.08957188409455	-2.07795294156222	0.0389130522261053	0.0818619561358303	-3.86024273052794	-13.1994365297365	5.08957188409455	-3.55319224793913	0.000468696774342892	0.00101225053775395	-1.70363009095713
179	TUNAR	80.6918171335133	2.87041989256766	15.8935023159949	5.07716191857934e-38	1.23580281592655e-35	33.4010755153778	78.0385658510737	2.87041989256766	15.016474899997	3.09353762112671e-35	3.84674678105322e-33	30.1471509868557	-8.75939719848452	2.87041989256766	-1.08548935489481	0.278932913899802	0.396003044801902	-4.60114750108312	76.1853864612199	2.87041989256766	13.0550917067931	5.31098137645563e-29	1.84114021050462e-26	21.1418202179797	-24.4597535037008	2.87041989256766	-2.85579450796734	0.00471803432442183	0.0112846148173501	-3.56496470733778	-42.2014383372592	2.87041989256766	-3.94580759615186	0.000108012872947274	0.000641238851332027	-3.10333205415086	-63.1994788418285	2.87041989256766	-6.03060991669724	7.13612631965089e-09	8.73126043816109e-08	-1.11976064766113	5.50458971785283	2.87041989256766	0.714597016601941	0.475641117728762	0.541103260423333	-4.72209557536294
180	LYAR	31.5176651282416	6.30211693940485	11.6517273199861	1.36683482371575e-24	4.33146548014077e-23	33.4006585379671	33.7075696694395	6.30211693940485	12.1399360482363	4.07760339043605e-26	1.29218234865896e-24	35.2267457569266	-14.0922622442762	6.30211693940485	-3.83145357192754	0.000167653892369704	0.000697947790651169	-0.492116384841004	29.3529193552665	6.30211693940485	8.67201921186848	1.09477745833641e-15	4.42553149235638e-14	16.2035651959486	-12.1294071458303	6.30211693940485	-3.10775719802348	0.0021423972623123	0.00563384695731586	-2.1242260807581	-14.3981976364242	6.30211693940485	-3.30282821335241	0.00112267374833211	0.00457157640322975	-1.96953282987402	-4.08737724033231	6.30211693940485	-0.987107091501427	0.324710966334667	0.447337843794387	-4.76284412605104	-12.4323399322009	6.30211693940485	-3.27581434360175	0.00122999426224702	0.00247818498769037	-1.75469960944474
181	TOMM40	18.6739727339063	7.46182561250637	11.0548601030685	9.60023422143312e-23	2.35174902555021e-21	33.3450071574502	19.7030790284258	7.46182561250637	11.1874113910034	3.75129251253017e-23	8.05155466104036e-22	33.4184073320849	-10.4173485584976	7.46182561250637	-4.71193890215928	4.42828268356093e-06	2.6140120691402e-05	2.54389272801719	18.6164790758988	7.46182561250637	8.65591878230837	1.21531377934062e-15	4.81079226147291e-14	18.1860931120113	-5.70991898938647	7.46182561250637	-2.40604131349278	0.0169810376683334	0.0347705514454508	-3.17399541739254	-2.67467810361831	7.46182561250637	-1.08173647440085	0.280593734880624	0.395806698771189	-4.79004136758589	-0.287386672937639	7.46182561250637	-0.115574202414492	0.908098976869641	0.939554336202288	-5.19298014071846	-8.32448076440375	7.46182561250637	-3.55880915707068	0.000459342310628771	0.000994676515917687	-0.79427393496544
182	CBX5	-27.6814401454007	7.72030384735616	-11.4598380326123	5.3924413726034e-24	1.54223823256457e-22	33.2623831062569	-34.5492515110523	7.72030384735616	-13.1859730968412	2.04421694561243e-29	1.04401079722349e-27	39.9087552907621	0.153041825346831	7.72030384735616	0.0623611898791637	0.950333724397026	0.96672753041988	-5.37340225948522	-2.75694595560165	7.72030384735616	-0.982052216700046	0.327189127651519	0.416697722847703	-4.9135940819587	5.91844567374949	7.72030384735616	2.13709157206831	0.0337314666195709	0.062705228815062	-3.59119563260186	18.4807621900999	7.72030384735616	7.16331910867063	1.26691947521341e-11	3.94919858213662e-10	12.0535994954792	25.5484273389164	7.72030384735616	10.0302137275408	1.23012657534365e-19	9.57322994689211e-18	25.3340040315767	3.84741206484159	7.72030384735616	1.4142270162092	0.158756402367348	0.208038172174394	-4.54270430128551
183	NSD3	-31.0840332594148	6.57574616853177	-12.4328880846994	4.89745219921081e-27	2.31515922144511e-25	33.207889344708	-45.9921042706202	6.57574616853177	-15.9386907938047	3.6513524823334e-38	7.07991057591425e-36	42.0992018196414	2.92272155694789	6.57574616853177	1.20260062724161	0.230467058641415	0.341388469617738	-4.72065792370777	-6.17682131938357	6.57574616853177	-2.1236079910423	0.0348574345982861	0.0628477623017169	-3.66609234833698	21.1722960334105	6.57574616853177	8.04541570836294	5.95780800153954e-14	8.94453064798062e-13	13.7599506691625	13.005469218499	6.57574616853177	4.71092686656644	4.4482388734312e-06	4.30523288596049e-05	1.89279828477266	14.4697903671378	6.57574616853177	5.425937199426	1.56218921746283e-07	1.46487251211268e-06	4.19330216837627	28.9604805803817	6.57574616853177	11.8993389330894	2.30978457120851e-25	4.5795382139732e-24	31.5277726042304
184	CXCL12	73.0365854676997	3.62825112656164	14.1251866862303	2.12144943658904e-32	2.05672725038801e-30	33.1889843573804	70.168600523327	3.62825112656164	13.274407135802	1.07187892371351e-29	5.65082713699656e-28	29.6002961737801	-59.9718072665189	3.62825112656164	-6.62212479328276	2.84104608892114e-10	3.29630499566509e-09	1.76269262617986	65.1182106686602	3.62825112656164	10.6307178747003	1.90304816038548e-21	1.84498906396694e-19	17.1683670611282	-5.93998846427326	3.62825112656164	-0.705492333512881	0.481275314742868	0.576582846440298	-4.74086492291218	-83.8537973420824	3.62825112656164	-6.73936327652299	1.4665481869591e-10	3.89264762385431e-09	-0.478101457984333	-1.33156532147644	3.62825112656164	-0.149864859853956	0.881013155555682	0.920773844286223	-4.81243761920123	-41.4328245791066	3.62825112656164	-4.27013337474011	2.94324298028613e-05	7.72795494479535e-05	-2.06663336182875
185	MEX3A	-54.4613269597705	6.41345645754663	-13.5723286592611	1.21482077053783e-30	1.02187864815829e-28	33.1603116457641	-70.1987572882138	6.41345645754663	-15.9313379909938	3.85253387840398e-38	7.22507992933467e-36	37.6001996119898	21.4224590422099	6.41345645754663	6.99226716088052	3.43929146881095e-11	4.46600390501671e-10	11.062552504663	-18.6854080177122	6.41345645754663	-4.29420311306942	2.66427075129133e-05	0.000111523078649004	0.271756000381958	29.6568959107767	6.41345645754663	8.53856754802971	2.59510773988715e-15	4.47783296294253e-14	16.1964560899003	11.4738807647067	6.41345645754663	3.17200812185652	0.00173747824405836	0.00653195895893119	-1.78295971265257	25.3558214456029	6.41345645754663	7.64760016029484	6.96430782975956e-13	1.76629485168035e-11	13.0567216695921	29.5954851520589	6.41345645754663	8.87106136240393	2.98829763128858e-16	2.8441035692131e-15	18.1327849506383
186	GNL3	20.4940161614673	6.86004284923536	11.3982909038443	8.3658494340308e-24	2.32859653346259e-22	33.1550620023732	16.6720228949134	6.86004284923536	8.85869548355757	3.2405739742203e-16	2.91218902317991e-15	19.9889605292721	-7.36419620140228	6.86004284923536	-3.28814906200151	0.00117985878834982	0.00398276321591086	-1.44803632822563	16.3617334159183	6.86004284923536	7.20667075432091	9.81440791574434e-12	1.82861281036018e-10	10.8946354600755	2.06169341695905	6.86004284923536	0.869896286684458	0.385337078116788	0.482874983293772	-4.92571869972209	-13.5199105348151	6.86004284923536	-4.99028064730145	1.25187186156211e-06	1.43214140962705e-05	2.27025777364767	1.34800100343365	6.86004284923536	0.546204448809246	0.585497495105036	0.694439905656297	-5.06013610962902	-9.0034575429112	6.86004284923536	-3.69648290404466	0.000278106623718928	0.000620062322226571	-0.667411317021981
187	AKAP1	40.1522444195766	4.66400278683358	13.0601887914613	5.11721952905857e-29	3.34519950928171e-27	33.1465908308734	43.3282005496789	4.66400278683358	13.8089340800654	2.15063110477628e-31	1.48212167702655e-29	35.4004541082652	1.27136947865106	4.66400278683358	0.31284136844909	0.75470750693312	0.827473057246971	-4.96227570537285	35.1726510472264	4.66400278683358	9.15264109441614	4.65880256573861e-17	2.31724788487173e-15	13.8464282647721	-15.0504473863422	4.66400278683358	-3.38190035037928	0.000856552047852428	0.00248200492082872	-2.18046312855176	-32.4495285898504	4.66400278683358	-6.39184443799085	1.01955566040003e-09	2.27362899707141e-08	2.87511148182741	-30.7436556434262	4.66400278683358	-6.01002106547166	7.95532587890882e-09	9.68180085688477e-08	2.02266217479969	-28.1030835430725	4.66400278683358	-5.66922224548249	4.63541852669062e-08	1.8548159477209e-07	1.55904948158753
188	ARL3	-23.6442717823732	7.1768009621369	-11.733586937489	7.59983479940076e-25	2.5055363142693e-23	33.1204814669453	-26.8035765952711	7.1768009621369	-12.5961304118007	1.49851326143586e-27	5.75268178215647e-26	35.9347877706448	5.99665135662821	7.1768009621369	2.93199001854194	0.0037361770914145	0.0109566434057375	-2.09859311765714	-10.9669190460465	7.1768009621369	-4.50506658611271	1.09376827019501e-05	5.0720344592748e-05	1.48581035154052	8.8167283390498	7.1768009621369	3.80943922200021	0.000182253747840099	0.00062462039403557	-0.221891564168523	15.198646326309	7.1768009621369	6.73459801768398	1.5067081738604e-10	3.98077171107689e-09	9.35060629803483	17.7406690126454	7.1768009621369	8.09422951675383	4.38686088037285e-14	1.32766371617633e-12	15.1294642309738	19.9985409150489	7.1768009621369	9.42101374538201	7.75117549389584e-18	8.54272135358078e-17	21.3743038281471
189	PAK1	27.102507402968	6.06629684642381	11.794652645039	4.90243239647272e-25	1.67414407807904e-23	33.10398796478	26.8704129388044	6.06629684642381	11.3221584869328	1.43915611064293e-23	3.28621674765571e-22	30.2208271635252	-5.37238349329255	6.06629684642381	-1.86582670125769	0.06344138814473	0.120639873732665	-3.98967117895441	30.0674410337565	6.06629684642381	10.5911673916102	2.51004975629123e-21	2.37313795140262e-19	23.3973365717175	-8.97203742347077	6.06629684642381	-2.66110253657537	0.00838235189687313	0.0187549590651728	-2.96689945545641	-14.9760715285101	6.06629684642381	-4.03431696051227	7.6339832178069e-05	0.00047566867108775	-0.711090066855484	-20.8662210978224	6.06629684642381	-5.363299464862	2.12310621506976e-07	1.92154549844921e-06	1.99573916146343	19.8126273138146	6.06629684642381	6.931264809375	4.89389984724851e-11	2.78677024651682e-10	9.06077340969952
190	PHPT1	-18.878824851531	8.7034347066628	-10.851582903431	4.0336010794882e-22	9.11944591884288e-21	33.0625303180231	-17.097935504426	8.7034347066628	-9.53059797623283	3.70489849190898e-18	4.22151780352975e-17	25.5437228512649	10.489915031912	8.7034347066628	5.96250577290694	1.02133504117163e-08	9.46845451458953e-08	8.29851462889679	-5.33873478270913	8.7034347066628	-2.49666924243372	0.0132948854918928	0.0273009316150159	-2.94413995641327	-4.73905463400069	8.7034347066628	-2.20102832984135	0.0288089346492318	0.0547181405932106	-3.47900956946666	14.4011240191903	8.7034347066628	7.34058244763529	4.43549545615795e-12	1.50124461593038e-10	13.8612030189996	5.2210374583136	8.7034347066628	2.56605059253925	0.0109733012120397	0.028216355555346	-2.79672787709498	-8.14654609482593	8.7034347066628	-3.84273150448849	0.000160610582620803	0.000373224673000606	0.26746045404826
191	MAP1B	-46.5221209240161	8.3962116183843	-11.3206253704562	1.45495145444378e-23	3.88893566327965e-22	33.0267109889049	-39.5127789382357	8.3962116183843	-9.22866682834902	2.80895461192533e-17	2.87427913778406e-16	21.9910081873167	-27.5272786574281	8.3962116183843	-6.49394551965192	5.80610188781263e-10	6.44246417037599e-09	9.65571438315299	-11.1112680351634	8.3962116183843	-2.46664975462419	0.0144282576371819	0.0292554532735486	-3.0146368720434	61.1867366424762	8.3962116183843	18.0659407889066	7.62734710330725e-45	8.90376029202398e-43	72.6915484638537	41.3314387945748	8.3962116183843	11.2901340047766	1.80759256411297e-23	2.08877362964165e-21	34.7408295224425	0.113537510934341	8.3962116183843	0.0254922093199379	0.979686247502918	0.986498606762907	-5.3446908171417	99.4514766720775	8.3962116183843	35.4851946608509	2.4724943034799e-91	2.82853348318101e-88	150.486191968557
192	MT1G	77.6753055531765	5.77934043575932	11.4960343468794	4.16401345407267e-24	1.22144394652798e-22	33.0042274209012	79.2540670381057	5.77934043575932	11.602967003063	1.9381219366414e-24	4.89741597714108e-23	33.3244912608501	-47.3912302043042	5.77934043575932	-3.88665184314759	0.000135764250256174	0.00057953097870546	-1.13833153350498	70.6845055869113	5.77934043575932	8.7349310707482	7.27291671780232e-16	2.98215653231751e-14	17.3177605357962	12.4845298681801	5.77934043575932	1.24099222393813	0.215974708682297	0.30241746234094	-4.60455742017754	0.176509143494092	5.77934043575932	0.0134571725427204	0.989275659637711	0.993088497792028	-4.93704050146014	-29.0504646686432	5.77934043575932	-1.90502069812156	0.0581254722959456	0.113145380817699	-4.11130016203419	23.6142753641451	5.77934043575932	2.56956961577442	0.0108658611569465	0.0184156224645138	-2.97798736548082
193	AKAP9	-35.7325371846694	6.79351991816144	-12.2626330824868	1.68004844525098e-26	7.28020992942092e-25	32.989175644878	-39.549062554086	6.79351991816144	-12.6759961439995	8.38891247477714e-28	3.3322624552587e-26	32.9920477098614	8.47784926439307	6.79351991816144	3.12042314641188	0.00205626171034357	0.00649824142716309	-1.71261889929011	-9.30731348507293	6.79351991816144	-2.76127376545003	0.00626063586574639	0.0140904336620379	-2.65506654893418	12.0559832119832	6.79351991816144	3.93348440973673	0.000113307362785785	0.00040800636772722	0.0323658345491928	14.4065618957153	6.79351991816144	4.74005718039197	3.90711765358071e-06	3.83011362099086e-05	2.28332604585438	-0.810043495733074	6.79351991816144	-0.2513966791894	0.801749992557452	0.864829830989302	-5.15003678796788	31.3740788975434	6.79351991816144	11.2686632235506	2.10587716696723e-23	3.62274207370001e-22	29.5464435276808
194	PRDX2	-18.7779809103807	9.59636739271047	-10.5441024316792	3.48808745622331e-21	6.97617491244663e-20	32.9483420710348	-20.0416069551432	9.59636739271047	-10.8882708370843	3.11462162832393e-22	5.95840659331535e-21	34.5890680626898	8.2355285050533	9.59636739271047	4.62841541323824	6.40256414155304e-06	3.64767598502823e-05	3.33843470100304	-12.9046884535188	9.59636739271047	-5.7996887222157	2.38023410608426e-08	2.07228905430776e-07	7.3629490200785	8.73500146094136	9.59636739271047	4.29212752276337	2.6872924798683e-05	0.000111994994425112	1.97072191222226	9.22394340653144	9.59636739271047	4.56292798283758	8.51943065611416e-06	7.54352064287508e-05	2.91063224291936	1.44718666338152	9.59636739271047	0.69516326074245	0.487711242830647	0.606146290182926	-5.32947005392312	18.65682937727	9.59636739271047	9.80507471113888	5.75049508766792e-19	7.020881942681e-18	28.1022879646298
195	DSCC1	36.6875714020246	4.85516947104833	12.7101684200978	6.54393165459344e-28	3.59732139477758e-26	32.84439269984	32.7674712183158	4.85516947104833	10.7530297580846	8.06886327123963e-22	1.44683065553262e-20	23.6189267628315	0.551504127592509	4.85516947104833	0.145973677433662	0.884080326463766	0.922029752811611	-5.0101800028816	19.6005509197837	4.85516947104833	5.14685771027302	6.01076484045896e-07	3.84581374579701e-06	1.89770445814519	-9.6963886432644	4.85516947104833	-2.30525573531878	0.0221157783353295	0.0436365133073765	-3.60539385897482	-12.4350662868741	4.85516947104833	-2.60025536128087	0.00996816843201078	0.0276987726165177	-3.39734891548453	23.8229526164748	4.85516947104833	5.88115821846594	1.56173813720751e-08	1.79560646127175e-07	3.33071581538307	-86.9234247316728	4.85516947104833	-14.640810454621	4.84915680606393e-34	1.74997961707796e-32	15.7502838376613
196	FAM124A	62.282206226679	3.50638471463313	14.1924575273521	1.29591101549331e-32	1.30045807168802e-30	32.6351898530316	66.549972137792	3.50638471463313	15.0407310553341	2.59007899864119e-35	3.2560993125775e-33	35.0581403609904	2.03811185715415	3.50638471463313	0.305462541713552	0.760312430490957	0.831775202325336	-4.83552764951211	54.2801571879697	3.50638471463313	10.1036907737443	7.41721033773337e-20	5.73330312592363e-18	14.4461536055053	-33.2220451369381	3.50638471463313	-4.58714606379256	7.66806498455099e-06	3.573224579359e-05	-1.24381045903408	-4.87516892300107	3.50638471463313	-0.611665417415331	0.541411947252873	0.648100117799165	-4.72938672125122	-58.3598184723825	3.50638471463313	-6.44912948201509	7.43904772722841e-10	1.08688002553631e-08	0.0717117505600866	3.78882743810714	3.50638471463313	0.600641557876188	0.54871781466837	0.612303140831657	-4.799780407114
197	ATP5F1B	13.7422427848258	9.18092156973123	10.4762547758229	5.60095449033065e-21	1.08785941204385e-19	32.5208463484905	12.5744840845467	9.18092156973123	9.26703111646113	2.1746209429823e-17	2.24933667158386e-16	25.3679370031758	-5.02157786732107	9.18092156973123	-3.27185311632481	0.00124651072966601	0.00417939119208063	-1.10828833826155	6.07727312060594	9.18092156973123	3.75991735075829	0.000219615833621301	0.000733977545027076	0.20324546123415	4.93468794034089	9.18092156973123	3.05454227447563	0.00254193810643053	0.00655392651286122	-1.68372230097353	-8.22485100401733	9.18092156973123	-4.60676659325381	7.03897879377126e-06	6.42664943341925e-05	2.6719089028994	-7.87477666597031	9.18092156973123	-4.36254640669509	2.00347686794134e-05	0.000114085492131652	1.85572872735871	7.31754024635235	9.18092156973123	4.64456695113717	5.96424988025349e-06	1.7428101821226e-05	3.08501757396101
198	PGLS	-22.2961238967136	7.45339878344827	-11.4200849031587	7.16144053406509e-24	2.00310219339131e-22	32.391234455043	-20.0914408078967	7.45339878344827	-9.9457360288716	2.19724324203524e-19	2.93650265057046e-18	24.6693002962199	8.87932086460289	7.45339878344827	4.50878593421189	1.0764181378662e-05	5.83059824677527e-05	2.17786123657125	-3.95006968346259	7.45339878344827	-1.72126777963454	0.0866553299757864	0.137609241382981	-4.17040372613455	2.52466068454219	7.45339878344827	1.10457633858512	0.270590364018792	0.363200019286047	-4.79745429086463	12.6385566089006	7.45339878344827	5.64092240771152	5.34915387948708e-08	8.37131605763778e-07	5.4505118189462	3.40569284388879	7.45339878344827	1.49183875976223	0.137222121505738	0.227477332274402	-4.43550761972261	8.03964878613117	7.45339878344827	3.72495433561861	0.00025023646047491	0.000563635579411885	-0.279279974800334
199	PPAN	30.9768146986237	4.88549705074037	12.6611301697124	9.34586484576645e-28	4.9728694807241e-26	32.359586945209	32.2338122162296	4.88549705074037	12.7161800659787	6.26410235395901e-28	2.56850648492083e-26	31.6006415862393	-13.7817227586837	4.88549705074037	-4.04333900553061	7.36621304909979e-05	0.000335067504102193	-0.829614429479617	13.8045257302916	4.88549705074037	4.21176573510265	3.74055301593644e-05	0.000151557656181301	-0.35164757147291	-9.18097178744329	4.88549705074037	-2.66666270603509	0.00824943044775337	0.0184792411048166	-3.1289290031096	-12.305928912219	4.88549705074037	-3.30349309876498	0.00112014569805545	0.00456355654763331	-2.35031625646462	1.0787063680579	4.88549705074037	0.294244675059857	0.768857711685386	0.84089218180505	-4.91699366571032	-27.3087399861406	4.88549705074037	-7.48692264603299	1.84478188284782e-12	1.22485808124081e-11	6.81346656541588
200	DCTN3	-41.0692525120531	6.32827697068485	-12.6543803737547	9.81562753328445e-28	5.19864717503584e-26	32.3529422293811	-44.5777029191056	6.32827697068485	-11.9882784196132	1.21750089060433e-25	3.5897448939468e-24	26.1448465585161	-6.60758320857471	6.32827697068485	-2.10275825575045	0.0366621149214618	0.0759533854946619	-3.66127576667875	-26.0799560152171	6.32827697068485	-6.57623596523857	3.67315039776412e-10	4.91471819303176e-09	6.33120040707917	23.2747499745997	6.32827697068485	7.21638345116729	9.26762312670509e-12	1.09753217980855e-10	10.4540394418602	19.9024912905765	6.32827697068485	6.06805247180854	5.85276530174127e-09	1.11037537399536e-07	6.21438590636846	15.9829183329816	6.32827697068485	4.67751228289987	5.15809203353963e-06	3.38740372351856e-05	1.71887023821676	46.6953098639774	6.32827697068485	16.3655972007339	1.62920318153434e-39	8.79154924375136e-38	51.7508449781268
201	PDCD2	18.140552382636	7.18189605898641	11.057408671879	9.42859098330321e-23	2.31465838731735e-21	32.3236948035124	12.7399992579597	7.18189605898641	7.30693855239861	5.4192391723807e-12	2.92987221796008e-11	13.2177032291444	-8.35283453554942	7.18189605898641	-4.06211968006151	6.83722364579948e-05	0.000313247250732663	0.56782196904839	16.8652246143708	7.18189605898641	8.06987834450665	5.11115409305378e-14	1.54278635420937e-12	14.8486433611156	-3.90866948517952	7.18189605898641	-1.75274836899117	0.0810850578345841	0.132984154639521	-4.12760859775486	-5.14000893913921	7.18189605898641	-2.17072690063037	0.0310583264866104	0.0696692957261647	-3.57855420795799	-9.39915478218936	7.18189605898641	-3.95003244428581	0.000106252467211015	0.000502699844869317	-0.0945218538147667	-1.56923229662362	7.18189605898641	-0.72191036248266	0.471141955011255	0.537086948092951	-5.03706632885102
202	TMSB10	-25.0406734579562	10.9155352756805	-10.2474465464083	2.74698124214173e-20	4.86462312849866e-19	32.2832313909895	-34.1553680838902	10.9155352756805	-13.1707734562281	2.28402591737702e-29	1.15616179180501e-27	49.3142043844171	21.9116222930261	10.9155352756805	10.1541839261053	5.23537189527981e-20	1.7985782126727e-18	32.5597716094795	-7.05178348030712	10.9155352756805	-2.57239047040205	0.0107804179750769	0.0227081534956509	-2.78489096844657	25.7914868936008	10.9155352756805	10.7073197726855	1.11228181616402e-21	3.51505634721448e-20	35.1642122607444	-12.759121538936	10.9155352756805	-4.67052632080938	5.3197316744234e-06	5.05462876706011e-05	3.50916864747585	17.7806913062746	10.9155352756805	7.19346468608985	1.06092159174524e-11	2.1829034189866e-10	15.0485009776292	36.5169133795278	10.9155352756805	16.7548007452743	9.64875586605331e-41	5.5468224677211e-39	73.867937934891
203	PNISR	-18.1089190004249	8.67161359332246	-10.7170260630538	1.03902836128391e-21	2.25549989622161e-20	32.2713236367627	-10.4392122092391	8.67161359332246	-6.05489080061679	6.27577198672922e-09	2.35084582607015e-08	8.64377833600451	0.813926873337833	8.67161359332246	0.457387901750624	0.647858793008122	0.74285903498175	-5.41198544982932	4.09709155399474	8.67161359332246	2.05682075129415	0.0409229425246402	0.0721575928609563	-3.72088322209923	7.54148162056268	8.67161359332246	3.80726652739102	0.00018375819332242	0.000628834499434186	0.220192576844804	7.72840094424458	8.67161359332246	3.8399469990315	0.00016232302423071	0.000908608407191676	0.289312807420404	4.67425921907411	8.67161359332246	2.3458407737346	0.0199038237286888	0.0465929493464703	-3.22134913012561	7.4678538613523	8.67161359332246	3.90838449218474	0.000124863172162676	0.000295619761908321	0.565644503388367
204	BRIX1	20.9101527418221	6.73100256780242	11.2593909865386	2.24941559391396e-23	5.92933511391146e-22	32.2676425898727	17.3998487210117	6.73100256780242	8.9303651733908	2.02453705842161e-16	1.86329074403405e-15	20.1752829933791	-7.01688503655665	6.73100256780242	-2.97623567441373	0.003255721154478	0.00971198174895131	-2.14587508066547	15.756552624132	6.73100256780242	6.61223210454386	3.00309451278037e-10	4.08506554413882e-09	8.42782997813122	-2.47764857134553	6.73100256780242	-0.952046510283054	0.342153308940677	0.438766265472631	-4.8391377215978	-7.79681531193346	6.73100256780242	-2.8212746001067	0.00523595473079354	0.016259316536449	-2.61829536489838	3.10555730875788	6.73100256780242	1.15127768395841	0.250909697373997	0.366403744952582	-4.6875175344882	-7.76619569158391	6.73100256780242	-3.04863357533341	0.00259029950922315	0.00492242963214499	-2.09816474434318
205	COX7B	15.5796155391224	8.69500540278311	10.5156709696149	4.2542539333159e-21	8.40564162299376e-20	32.2109408228131	14.1181322258231	8.69500540278311	9.25328809252689	2.38355759249878e-17	2.45656746470144e-16	24.8955722129641	-12.1744791711229	8.69500540278311	-6.63904003690938	2.58365613457085e-10	3.0129486421499e-09	10.6817145118063	12.2653024181681	8.69500540278311	6.63202153626804	2.68754310130252e-10	3.70427627456636e-09	10.6035911084525	0.441977835394749	8.69500540278311	0.227451856349823	0.820290738600286	0.867534995801726	-5.37375578488781	0.382875419346401	8.69500540278311	0.189772248594982	0.849668465231216	0.894131064420608	-5.35053995309664	-7.45135009831104	8.69500540278311	-3.4742025817093	0.000620708046403713	0.00238285236605989	-0.840329802713486	5.66073121527054	8.69500540278311	3.04580968744466	0.0026137103553328	0.00495950347736063	-1.74209835322926
206	MDN1	29.8025068125761	6.02244224422292	11.5761068882737	2.34893032500269e-24	7.10893198889703e-23	32.1408730911617	35.0737644272584	6.02244224422292	13.421212934785	3.66740668384812e-30	2.11894608400114e-28	40.4515992270781	-9.52048954149554	6.02244224422292	-2.82012569142061	0.00525404965382048	0.0146111434960344	-2.57596022036023	30.3707895774279	6.02244224422292	9.6385966725636	1.7842101157751e-18	1.11584973055729e-16	19.774095334517	-9.35145959382108	6.02244224422292	-2.46224619915015	0.0146015372750796	0.0305098787994356	-3.26277931068493	-10.9032486935629	6.02244224422292	-2.69151123254783	0.00767831762000892	0.0223227328012457	-2.99687525713422	-6.24033603329884	6.02244224422292	-1.51821197415007	0.130444949201374	0.218330683081743	-4.36218915336366	-2.73881929282118	6.02244224422292	-0.776256769785744	0.438459158283928	0.50589740501948	-4.90628381795696
207	SOX11	-49.9431459848962	7.20286300402482	-11.9114761772827	2.11661790111379e-25	7.66269265466513e-24	32.0968128125075	-57.9845284439746	7.20286300402482	-12.0807338299176	6.25141598181629e-26	1.92766034587543e-24	29.5555957432301	10.626605163406	7.20286300402482	2.8779960952694	0.00441007528612979	0.0125970689821036	-2.17528911933507	-8.22860192252863	7.20286300402482	-1.79137340815513	0.0746541654212148	0.121009629930797	-4.0796428033079	50.3331583517519	7.20286300402482	13.8082687556113	2.16113192838163e-31	1.19436469858385e-29	44.4168810353556	10.6700682373352	7.20286300402482	2.49450535674368	0.0133738491187932	0.0353178286978287	-3.01003209425308	12.2776773171862	7.20286300402482	2.85121196253679	0.00478399003289727	0.0140222510828452	-2.34597687211552	74.3061443894697	7.20286300402482	22.9514204957385	1.74955634400535e-59	3.03256432960927e-57	89.195518341002
208	MDH2	14.4721354185313	7.96547390463704	10.689036637459	1.26452143946485e-21	2.71919647884922e-20	32.0366723705385	14.154078169564	7.96547390463704	10.0605686702236	9.98271381609028e-20	1.38092195956557e-18	28.1620764449248	-1.782096348333	7.96547390463704	-1.07389297388093	0.284086644875534	0.401426780802385	-4.91614171069862	13.0590580352226	7.96547390463704	7.59765048861469	9.43884397538753e-13	2.25606881998643e-11	14.0156778193157	0.551594586359702	7.96547390463704	0.314304028351447	0.753598009569965	0.813393832387999	-5.28958961503413	-6.62509689736757	7.96547390463704	-3.46587821714215	0.000639176102730513	0.00286670337585894	-0.967106382202999	-7.02761096816308	7.96547390463704	-3.59395691732347	0.00040467554015399	0.00163240062741948	-0.695662464563318	-0.933854303740272	7.96547390463704	-0.524631816064923	0.600385158330828	0.659852647834055	-5.2113407260864
209	APRT	19.4499978924634	8.54566961669813	10.4970212987131	4.84565285108471e-21	9.49216928363169e-20	32.0074864975263	23.0689317578499	8.54566961669813	12.1498518089357	3.79584339065742e-26	1.20623467747558e-24	41.095823703658	-0.565109861341183	8.54566961669813	-0.251838999591411	0.801408519501956	0.860855724234965	-5.42559605648235	15.2389919334716	8.54566961669813	6.5842610361056	3.5120737805427e-10	4.70469836644127e-09	10.3433983697434	-10.898918898547	8.54566961669813	-4.31619067815161	2.43170941438509e-05	0.000102087176882809	1.5947329220667	-10.9028841775495	8.54566961669813	-3.92633930874293	0.000116489106271891	0.000683402756795093	0.258649416407913	-9.48923583720489	8.54566961669813	-3.47225788667513	0.000624977150149532	0.00239682822585003	-0.884645671034958	-18.4681670311088	8.54566961669813	-7.18650367948192	1.10533846041659e-11	6.78383690298591e-11	12.2282397319067
210	DPH2	35.7629917436183	4.10779163468043	13.4652884111391	2.65730390621055e-30	2.05402410047626e-28	31.9047790517183	38.0316536942002	4.10779163468043	13.990317430092	5.69791144740114e-32	4.2054262553722e-30	32.9714628421478	-12.2704068130833	4.10779163468043	-3.35860650583673	0.000928091796554258	0.00321933600745322	-2.30693648110674	25.1800962380413	4.10779163468043	7.39509103707451	3.20271622304635e-12	6.69818530011888e-11	6.94320262082556	-6.39897285410392	4.10779163468043	-1.64631652954293	0.101174391012926	0.159910891570582	-4.28764955691306	-31.4477267167067	4.10779163468043	-6.48531669296048	6.09038175499876e-10	1.44252520242621e-08	1.44019920388826	-8.15534523430459	4.10779163468043	-1.98257443013593	0.0487011983492601	0.0981747505049401	-4.04855371725148	-32.5972606284719	4.10779163468043	-7.33815366281161	4.50018129300356e-12	2.88253493795973e-11	3.80200610334936
211	TIMM8A	35.5207398799723	5.01898019236409	12.3222294201841	1.09157928495751e-26	4.89712432153486e-25	31.7882504212697	39.5239130294964	5.01898019236409	13.5371096122333	1.57172687360999e-30	9.71921915356664e-29	36.4349730167723	-4.28232128743448	5.01898019236409	-1.11379931742215	0.266621526103825	0.382320162776105	-4.66348539448983	20.5853460323634	5.01898019236409	5.48342117819204	1.17627368788477e-07	8.84718671229568e-07	2.96151009909976	-18.6174623286497	5.01898019236409	-4.41193523074938	1.62708543839934e-05	7.07482227871092e-05	-0.164413102302583	-19.4807733169868	5.01898019236409	-3.9368111492176	0.000111854279065112	0.000659594305414885	-1.61190538564848	2.6737257726526	5.01898019236409	0.618637357969441	0.536816800946391	0.651239045898909	-4.85570237722999	-36.0174649251341	5.01898019236409	-7.85430383742291	1.95694341791792e-13	1.44715143509897e-12	7.3484130732812
212	CD24	23.8443501080624	8.9144916183353	10.3773228100442	1.11543143502338e-20	2.09189108469958e-19	31.7649408360923	19.0777154411962	8.9144916183353	8.02083550750758	6.94817997102194e-14	4.73984370116226e-13	18.5371534944059	13.5936869170372	8.9144916183353	5.38311332941074	1.92726967546794e-07	1.45052401890482e-06	6.02134481086943	25.9984031794161	8.9144916183353	9.50317340448385	4.45801306625517e-18	2.62884894216284e-16	25.145157507232	13.5321136264063	8.9144916183353	4.85906295876913	2.2860392680214e-06	1.1731611869597e-05	3.78301357119914	-22.0593395562085	8.9144916183353	-6.33661886756495	1.37926702344663e-09	2.99408249492019e-08	8.42827618173156	-21.4280271855516	8.9144916183353	-6.20690243886444	2.78630880978361e-09	3.63459210763107e-08	7.97650960368784	21.3504574603765	8.9144916183353	8.01197365744902	7.34384252073753e-14	5.65367149644935e-13	17.7319352103661
213	EFNB2	-75.9698751584467	5.59762912698206	-14.8164576923707	1.33885932698955e-34	1.95418177572688e-32	31.6521250719069	-104.785701612086	5.59762912698206	-16.2190370341296	4.73327721661843e-39	1.06173904623755e-36	26.2229973854051	25.7184493351877	5.59762912698206	6.81438517223824	9.57013107268848e-11	1.18873289328508e-09	9.35592899963063	-50.9444293863712	5.59762912698206	-8.05936417770442	5.45936991205133e-14	1.63495266476092e-12	7.47344644135478	29.385570367509	5.59762912698206	6.75623601152276	1.33263884770475e-10	1.35755907548908e-09	7.91384415916805	38.0366145373713	5.59762912698206	9.52829785359	3.76287675878231e-18	2.57768324074669e-16	19.4420223197803	15.6210663694233	5.59762912698206	3.52331350995194	0.000521539096384975	0.0020467949443033	-1.26150044212308	15.11703411801	5.59762912698206	3.34366151467944	0.000976886245171772	0.00200602739988603	-1.66798718066934
214	IMP3	19.0889146364375	6.97617680580624	11.0416893942216	1.05381657153776e-22	2.57050353483837e-21	31.647432305499	18.5657532062212	6.97617680580624	10.359113012898	1.26594770557189e-20	1.9518115568386e-19	27.6379893057757	-10.8713940141281	6.97617680580624	-4.96924193406782	1.379848307558e-06	8.95883350650597e-06	3.0820479516198	11.5068046262694	6.97617680580624	5.18405767678726	5.03724907889737e-07	3.27049542920465e-06	3.69586097884722	-5.25025556086998	6.97617680580624	-2.22019798396184	0.0274600293845895	0.0525322301270407	-3.50008690694331	-9.51973438938831	6.97617680580624	-3.56818725116031	0.000444113855868135	0.00210466549756896	-1.20603788449527	-0.16838098425488	6.97617680580624	-0.0708482762261833	0.943585035129466	0.962621970767673	-5.17089975032537	-4.21172915099742	6.97617680580624	-1.83627374020077	0.0677120558144785	0.0971781897875238	-4.02346813419465
215	MATK	83.5320816088478	2.78193509249007	15.1303341430742	1.34397103776107e-35	2.32954979878586e-33	31.5661818903699	89.3787524000493	2.78193509249007	15.9317500449647	3.84097169558813e-38	7.22507992933467e-36	33.0998067571175	-6.14935501006769	2.78193509249007	-0.705450570103142	0.481301242972594	0.599069518016272	-4.71656185019773	74.4263780514576	2.78193509249007	11.3785034980433	9.63337869816439e-24	1.34397380862196e-21	16.2332615444751	-67.2239102465038	2.78193509249007	-5.68201542855038	4.34413001300897e-08	3.00445306657545e-07	-1.62652691375623	-46.8732383701289	2.78193509249007	-3.94275725754391	0.000109301075108363	0.000647271438471634	-3.14207527370284	-62.5518012317757	2.78193509249007	-4.62112339650174	6.61047206895306e-06	4.22479332228061e-05	-2.97936755462074	-42.6437915664551	2.78193509249007	-3.6254833127133	0.000360905089042373	0.000791403913867116	-3.35199604216369
216	MAK16	32.8303087551513	4.55760792213734	12.8846823841955	1.83834266937316e-28	1.11865107115048e-26	31.5398486805225	31.8284611831076	4.55760792213734	11.9546166368749	1.55156520736941e-25	4.49364708159647e-24	26.8271911763809	-2.06449022530294	4.55760792213734	-0.619954265356006	0.535951061391833	0.647647633075163	-4.87476384469192	19.3310142311219	4.55760792213734	5.83867852566887	1.94647133842671e-08	1.72483594977548e-07	3.26778000994821	-16.8942862516601	4.55760792213734	-4.37115129672326	1.93238505949506e-05	8.28578901072846e-05	-0.768010461219013	-13.0824184128316	4.55760792213734	-3.40335102500458	0.000795259441499196	0.00342536446187907	-2.31858139523223	-1.72261439942586	4.55760792213734	-0.449405248364538	0.653596648202039	0.752000971078279	-4.86048065439956	-36.4970261007105	4.55760792213734	-8.74209574843894	6.94135451523528e-16	6.36801087845162e-15	7.78793927881262
217	NMRK2	71.3356689401695	4.7828174119264	11.9567128540308	1.52831974616041e-25	5.58593543005593e-24	31.5017989693371	76.4739622660401	4.7828174119264	12.691128577529	7.51525511522297e-28	2.99562782293208e-26	34.4496278550597	-58.2740428169745	4.7828174119264	-4.8603037057058	2.27318398481507e-06	1.41717846246781e-05	-0.557597607531018	80.448931677359	4.7828174119264	11.8013346184471	4.67268533399837e-25	7.97843585387184e-23	27.6256776949256	1.996592852272	4.7828174119264	0.217167887125511	0.828285544564614	0.87380916910911	-4.95444178799042	-5.8663882852212	4.7828174119264	-0.524985069913928	0.600139988435211	0.698504575002423	-4.81488896249647	-51.7232000774044	4.7828174119264	-3.48143663576719	0.000605066134452038	0.00232984065234982	-3.04653727130015	37.5085153662347	4.7828174119264	4.78712523839404	3.16444983135721e-06	9.66657037936621e-06	1.40135840884118
218	TCEA1	24.2892678352565	6.96759040793669	10.9231094008452	2.43603640772516e-22	5.69902995999506e-21	31.4908692040514	22.6336918482824	6.96759040793669	9.72083230859281	1.02075991983206e-18	1.25280947646157e-17	24.7269794813015	-11.37404650719	6.96759040793669	-3.81752458708721	0.00017675698912273	0.000732114393759605	-0.247757917530156	25.9966433421074	6.96759040793669	9.27451129037344	2.06865442515885e-17	1.09562067702858e-15	20.0528761737393	-4.19551938196185	6.96759040793669	-1.33792152946325	0.182349754379088	0.262829934496254	-4.56087427317312	-3.09106424739913	6.96759040793669	-0.917063994480826	0.360147079707627	0.479581258509516	-4.8503885473633	-7.56782524412396	6.96759040793669	-2.20577009508201	0.0284700318194191	0.0628995260553514	-3.55936154847102	-5.21833164184035	6.96759040793669	-1.67439778326321	0.0955212207438017	0.132311752670916	-4.21696523657417
219	OAT	29.5251943185322	5.77703570888073	11.6368302154594	1.52077990052835e-24	4.74052372262787e-23	31.4168032196909	24.8145507366386	5.77703570888073	9.43695468726409	6.96339705604794e-18	7.7041839769041e-17	20.8113071898375	-5.17713960636852	5.77703570888073	-1.55237653267671	0.122057839386137	0.206254310572734	-4.33559551694262	15.9760584448307	5.77703570888073	4.86210199375295	2.25467606304669e-06	1.24857032199054e-05	1.94283087949973	-6.80716284051301	5.77703570888073	-1.85634012860378	0.0647871683405402	0.110030464046286	-4.03316708134208	-21.8127899969056	5.77703570888073	-5.27820436968714	3.20799305460964e-07	4.34117009091358e-06	1.75927717988377	-17.9089852857405	5.77703570888073	-4.45511883389279	1.35446170426957e-05	8.04519309285767e-05	0.0647295369400895	3.70220904940214	5.77703570888073	1.07830393921284	0.282118699205109	0.345772221866986	-4.7162645182108
220	RASGRP2	83.7471732119353	3.5962580339459	13.5262101042822	1.70213111047668e-30	1.38101985133711e-28	31.4075242053142	87.1009194095454	3.5962580339459	14.0153461426216	4.74347162160427e-32	3.53248344873909e-30	32.9599091126309	-65.6070287444352	3.5962580339459	-5.12379118793289	6.70367567268112e-07	4.62824681324514e-06	-1.41022328086858	75.0876697337169	3.5962580339459	10.0370321071461	1.17377382267936e-19	8.89269704069662e-18	15.1319780345036	-57.6064889342474	3.5962580339459	-4.82949068161132	2.61409209600309e-06	1.33030309511901e-05	-1.45183932369896	32.1335950724786	3.5962580339459	3.11461370198411	0.00209536410195619	0.00760705274132195	-3.06528592297755	-51.3154577811218	3.5962580339459	-3.85741304123175	0.000151861081491805	0.00068667619457164	-2.87677550153203	-40.0848855312454	3.5962580339459	-3.34616032286064	0.000968564640403946	0.00199036814913259	-3.11786828763342
221	USP44	52.8670144676338	5.92750863674244	11.2052240592498	3.30557884393307e-23	8.55561583135618e-22	31.4058770568425	60.0440956960235	5.92750863674244	12.6927191509375	7.42887482427228e-28	2.97154992970891e-26	38.6614267116654	-40.117842863323	5.92750863674244	-4.99740532827337	1.21119906676899e-06	7.96786505108526e-06	1.43873008159061	58.3434783473906	5.92750863674244	10.6002180684669	2.35602562903205e-21	2.24607776634388e-19	25.7137363962023	-16.0720531444372	5.92750863674244	-2.09595857349827	0.0372677493753682	0.0684119147712151	-3.76821180894628	-2.51809543154562	5.92750863674244	-0.310901466725384	0.756179801321609	0.825539008329882	-4.97011085876699	-41.7383296464149	5.92750863674244	-4.12528500552876	5.31118577280065e-05	0.000270766333515327	-1.33308766533857	8.01917332769347	5.92750863674244	1.17214550171394	0.242448998802651	0.302928849530617	-4.66171539913744
222	PCDH1	64.9435944394258	2.98395577183584	15.1106780620734	1.5519826424121e-35	2.64995245211856e-33	31.3397244732004	60.8299368532003	2.98395577183584	13.6508627379995	6.83918310030971e-31	4.39551992514287e-29	25.9968149295692	1.60747511488678	2.98395577183584	0.256534365841225	0.79778604627108	0.85833465337545	-4.81500458860588	53.2623250495024	2.98395577183584	10.4228679649775	8.12489080802498e-21	7.26162115967233e-19	13.6004815362328	-63.6956148075248	2.98395577183584	-7.23224577686831	8.43856481814545e-12	1.00664422856709e-10	0.244380197879204	-54.4913389217085	2.98395577183584	-6.14586228234514	3.86648286184212e-09	7.6263041274955e-08	-0.987485871631325	15.3551973440041	2.98395577183584	2.34440412944897	0.0199786725802326	0.0467394712306465	-3.86232813834194	-28.377648064966	2.98395577183584	-3.79281879503218	0.000194065318415578	0.000445536271859163	-2.76635338523728
223	ZSCAN2	45.3149303550306	3.98478497067211	13.4215067428935	3.65953988825579e-30	2.75428528431883e-28	31.3141941212368	44.8163237475763	3.98478497067211	12.8736273664201	1.9924297265023e-28	8.86902570863279e-27	28.4749544438189	-11.9370342244176	3.98478497067211	-2.50860668974282	0.0128666845625203	0.0312184244740685	-3.4789658564705	25.8508738211481	3.98478497067211	5.77984976369115	2.63587451737611e-08	2.27408781891272e-07	2.45190880320139	-5.86012668320153	3.98478497067211	-1.17196551265706	0.242521099474384	0.33302621269799	-4.58226382266073	-21.8042396075601	3.98478497067211	-3.90986319330885	0.000124152474899332	0.00072023545276286	-2.05117730904731	-18.5786936775983	3.98478497067211	-3.24779272219797	0.001351343799685	0.00471609916668591	-2.93349833904661	5.20613828433294	3.98478497067211	1.10645174983068	0.26978005023337	0.332681230426836	-4.62369131256087
224	TALDO1	18.9120104260133	8.09973667544062	10.4907724396021	5.06158379582668e-21	9.88131717137494e-20	31.3098762364222	20.1052755996567	8.09973667544062	10.9082912400166	2.70450383710293e-22	5.2439871010945e-21	33.3394817768811	-10.525915493169	8.09973667544062	-4.57831149106431	7.96868529993665e-06	4.45343233176723e-05	2.43797091417874	11.8680663141735	8.09973667544062	5.14444483789604	6.07985734133408e-07	3.8878461701991e-06	4.33276716971093	-2.89538685815223	8.09973667544062	-1.16151323265314	0.246734184400606	0.337434437482718	-4.79048127285107	-3.28360774738687	8.09973667544062	-1.26174736135509	0.20842071801466	0.314472832245807	-4.67971891653275	-3.81579344697199	8.09973667544062	-1.42643415233763	0.155208257038047	0.250576130470682	-4.50759302418687	3.69002812275722	8.09973667544062	1.57727069392736	0.116218381617616	0.157621610634918	-4.38319106398135
225	GUK1	-21.9821415943614	8.02979899186597	-10.9115570314396	2.64291022302328e-22	6.10805918209825e-21	31.2904583254257	-26.52338588065	8.02979899186597	-12.3878202484326	6.78876567338495e-27	2.32525387136299e-25	37.6479666796446	3.7138967713646	8.02979899186597	1.88155278073282	0.0612617407322033	0.116981190782241	-4.00485396965604	3.30557730158785	8.02979899186597	1.41151864417335	0.15955193864191	0.23026039839327	-4.55194455560532	4.9768771456416	8.02979899186597	2.21543099673	0.0277902367750742	0.0530663175941995	-3.4568051800282	12.1851666632758	8.02979899186597	5.71032098678771	3.76171210180942e-08	6.13019749924499e-07	6.50507975085059	3.30140512620474	8.02979899186597	1.44798872270788	0.149091668153487	0.242929224270652	-4.5229543906353	14.5503549396663	8.02979899186597	6.87589390918506	6.72989525044695e-11	3.77957789224905e-10	11.291404582698
226	DCUN1D5	17.1954048685866	7.04951286668765	10.9700012507547	1.74943032738769e-22	4.14357824954765e-21	31.2733145250997	18.6062820901983	7.04951286668765	11.6519368031989	1.36478477385578e-24	3.51647248038517e-23	34.4116509137055	-11.0345329869276	7.04951286668765	-5.50391476390292	1.06257365694156e-07	8.35453102090136e-07	4.75374580486682	13.2149512606898	7.04951286668765	6.68780351176897	1.96324828173547e-10	2.77617631917267e-09	9.06643377761147	7.95041451258635	7.04951286668765	3.98620700319825	9.22561336076717e-05	0.000339797221014734	0.23738710745249	-7.37744881394074	7.04951286668765	-3.35675384833116	0.000934014669859567	0.00392546944276027	-1.46082050018657	-5.77977400671176	7.04951286668765	-2.61446400625276	0.00957550167763935	0.0252929437063482	-2.89014114544889	6.74417009970632	7.04951286668765	3.40254034504096	0.000797499316739671	0.00166212282446745	-1.18597674985856
227	RMND5B	29.5763110423695	5.1749438064919	12.0664707953128	6.92888722381648e-26	2.71460513152262e-24	31.2436050192684	30.1513720807197	5.1749438064919	11.8575613415206	3.11940068468244e-25	8.72516964126336e-24	29.4706458373241	-10.2033103916392	5.1749438064919	-3.1286898496193	0.00200178121310199	0.00635415568198855	-2.25981429135084	24.5689795243599	5.1749438064919	7.82164420932806	2.39441666490974e-13	6.38511110642599e-12	10.3258468977448	3.90383065338576	5.1749438064919	1.13184547911143	0.258973005072242	0.350360829946363	-4.64407767915586	-5.03366562940727	5.1749438064919	-1.35330199533447	0.177394747936696	0.277088464827389	-4.48634680518442	-14.0652586550045	5.1749438064919	-3.60296608997166	0.000391682844419797	0.00158726593700407	-1.86215549859045	2.64026065707716	5.1749438064919	0.815091355571568	0.41593116212272	0.483365755250296	-4.8402408440074
228	SEPTIN11	-32.6343990280703	7.26050755231105	-11.4769385020437	4.77257914810384e-24	1.38223558112172e-22	31.2228703543035	-40.9112679322473	7.26050755231105	-12.7772430689933	4.0179889659779e-28	1.70243680632545e-26	34.2259552339483	-0.484907574903026	7.26050755231105	-0.176783693949554	0.859846406857938	0.903355945858647	-5.31779909411241	-12.6761324473063	7.26050755231105	-3.79080354462912	0.000195545762034135	0.000660869576859823	-0.396150732361922	20.9460837996109	7.26050755231105	6.94437770712152	4.53726046857162e-11	4.8968169585339e-10	10.334179782973	13.569337191375	7.26050755231105	4.5251565479258	1.00314800541706e-05	8.64808830593153e-05	1.88586397256076	24.6019017061193	7.26050755231105	8.66037588361395	1.18068616766557e-15	4.60991459320617e-14	18.1994934993982	9.72108499882156	7.26050755231105	3.35603497605013	0.00093632235850728	0.00192826782742093	-1.17982090529382
229	GPR160	76.3133684338407	3.22508369452789	14.3641769457076	3.68203821293814e-33	3.9366838463563e-31	31.1831251963507	83.2502391262493	3.22508369452789	15.6051803628695	4.16810805240148e-37	6.62266057214901e-35	34.7055692213508	21.5429864113452	3.22508369452789	3.13291923419348	0.00197442686566313	0.00628301622898085	-2.72977967065194	69.5574961368976	3.22508369452789	10.8890636427874	3.09726022409865e-22	3.2808015707119e-20	15.7843024614773	-52.150498119136	3.22508369452789	-4.72652109228494	4.15015295576432e-06	2.0367975038157e-05	-2.214620588944	-44.4502345359879	3.22508369452789	-4.10107477930559	5.8530913311136e-05	0.000384221723504869	-2.74868668767946	-65.3906023740964	3.22508369452789	-5.42226062741856	1.59068452717659e-07	1.4867182182108e-06	-1.90282726548372	-34.4193181907144	3.22508369452789	-3.31658909317936	0.00107141936592939	0.0021817439562535	-3.33027921969319
230	COMTD1	55.2246570949619	4.09971799840751	12.9302544371502	1.31913755632327e-28	8.27887953643562e-27	31.0900584305818	65.5110855093471	4.09971799840751	15.1765033304918	9.58536057493598e-36	1.29007676443844e-33	38.8087643323594	-1.81054428836496	4.09971799840751	-0.304984330375335	0.760676118910351	0.831944053569256	-4.91217600249374	42.6876224852793	4.09971799840751	7.98413158046981	8.7378107310106e-14	2.50527706172334e-12	9.38166557649776	-36.6739384633693	4.09971799840751	-5.03799079572234	1.00281724598152e-06	5.45258046294133e-06	-0.269177110498621	-43.3915339516001	4.09971799840751	-4.83706132713472	2.52601906978232e-06	2.62945024188442e-05	-1.55789655437617	-38.3528896826226	4.09971799840751	-4.51675897711169	1.04011249903017e-05	6.35624304962883e-05	-1.72952882511131	2.79969358969588	4.09971799840751	0.463996319748276	0.643124592702889	0.699234493491831	-4.87481350358343
231	ZNF589	39.0551692737407	4.01846008418911	13.3752899160046	5.12987147177879e-30	3.81076166474996e-28	30.9593772482256	32.8773802694146	4.01846008418911	10.7675604827795	7.28555976908273e-22	1.31254809068199e-20	20.6234062039106	-29.2300187602682	4.01846008418911	-6.76376201733493	1.27686153638863e-10	1.54248109570074e-09	3.65950696674951	28.8853116873759	4.01846008418911	7.77521193189158	3.18743803335773e-13	8.34423137336669e-12	7.82331742051029	-13.0196849293455	4.01846008418911	-3.03030682360924	0.00274574021255606	0.0070224162825042	-2.93317227904771	-22.7630227442056	4.01846008418911	-4.62766806772083	6.4235789975868e-06	5.93021772237414e-05	-1.13133684044783	-5.96723443548372	4.01846008418911	-1.31227518973649	0.190840753190839	0.295388745298769	-4.50653400072946	-17.8749387794766	4.01846008418911	-4.02994857939269	7.76694099514767e-05	0.000190346625930783	-1.62767210977761
232	EPHX3	65.403053036717	2.79757558277305	15.3409154377391	2.87799801707559e-36	5.77619251146399e-34	30.8104399040777	64.9326678063178	2.79757558277305	14.8495878768776	1.05033138652111e-34	1.18968228334669e-32	28.5734358446642	9.19330849094034	2.79757558277305	1.54531734959447	0.123755087367733	0.208613629958938	-4.38322378651059	46.2779860818395	2.79757558277305	8.53556595246442	2.64578914594405e-15	9.95652231236841e-14	7.31520371022893	-50.9046303884408	2.79757558277305	-6.39908531718697	9.79828717776857e-10	8.75721916513066e-09	-0.27546986521311	-18.2472607570374	2.79757558277305	-2.31897761064794	0.0213449350345347	0.0515922368043687	-4.06296392845122	-38.149733745472	2.79757558277305	-4.77769112799725	3.30143660087399e-06	2.26973766310087e-05	-2.09701180810363	-43.2051842161917	2.79757558277305	-4.97992521443235	1.3133558290277e-06	4.24549044478012e-06	-2.2130652880508
233	PTTG1IP	-25.9578702959208	6.65812509744702	-11.7399092740434	7.26275338422229e-25	2.43653661922296e-23	30.792808112124	-36.4791827107873	6.65812509744702	-14.8872856775906	7.96879759665058e-35	9.3023514801717e-33	40.8319244321088	7.94160227654432	6.65812509744702	3.66353784608939	0.00031400732049376	0.00123190800632669	-0.48913413288935	-5.74374818356865	6.65812509744702	-2.19409455232481	0.0293107999817712	0.0539092526995921	-3.56569124328126	10.1930084144286	6.65812509744702	4.23150434777256	3.45024168365739e-05	0.000140265688916278	0.723103805883374	7.83436318436349	6.65812509744702	3.19338065063949	0.00161933848695109	0.00616275192638738	-1.77062767537568	2.25855625593671	6.65812509744702	0.908573049415167	0.364603183553889	0.488929834703609	-4.88270352784669	14.8791071505329	6.65812509744702	6.31238163900442	1.57404058172349e-09	7.4842162323012e-09	7.34255181815009
234	DAZAP1	17.3988277810766	7.16558985900602	10.7699500653916	7.16420573411884e-22	1.58527105606034e-20	30.7574068961657	21.6414600829634	7.16558985900602	13.0888165234457	4.15306062625988e-29	2.0046841166419e-27	42.2795817786309	-8.22967988618803	7.16558985900602	-4.05083894391778	7.1504509634267e-05	0.00032623149517107	0.517497548085268	22.3517467000448	7.16558985900602	11.1755449279556	4.08098209540831e-23	5.16830648366226e-21	28.9560879263447	0.914379074004879	7.16558985900602	0.424358780955562	0.671732800479769	0.74680497934777	-5.1517382659978	-14.9961164646511	7.16558985900602	-6.19040828846727	3.04486283468141e-09	6.17610475687151e-08	6.22656416149474	-1.51728694702265	7.16558985900602	-0.640618447386382	0.522459727363039	0.638630118712807	-5.01254649332214	-5.93221420891503	7.16558985900602	-2.72411586614123	0.00698312902406858	0.0122884165567366	-2.63174878405522
235	PLPP1	41.6948361192151	4.66403454586486	12.238705509121	1.99741224639937e-26	8.52626720104806e-25	30.7249996005794	49.4860613515859	4.66403454586486	14.3391063764985	4.42464314204165e-33	3.92386957712841e-31	38.7047457683094	-2.98631358828831	4.66403454586486	-0.631907835856294	0.528125259970086	0.641086803223151	-4.87257553139965	42.5023802036305	4.66403454586486	10.1251426109358	6.39727162434365e-20	4.97855696479533e-18	17.9431666015855	-24.9641644155154	4.66403454586486	-4.41007782212746	1.63992104852829e-05	7.12251207105682e-05	-0.812677826697912	-20.3551816631441	4.66403454586486	-3.17641176036435	0.00171250249203631	0.00645716167069723	-2.9512671200836	-21.676933926367	4.66403454586486	-3.4401510811951	0.000699558855183391	0.00265349910586804	-2.59910852724232	-27.9027825974153	4.66403454586486	-5.0007675796203	1.19245242336413e-06	3.8721702308503e-06	0.333720948960052
236	SMPDL3B	81.3044254614527	2.77255109890728	14.9853132182303	3.88656933978079e-35	6.3517647495846e-33	30.6845738260533	85.9651202251099	2.77255109890728	15.7825887066824	1.14071958656638e-37	2.0390362609874e-35	32.6817219304521	31.6363971772752	2.77255109890728	4.41151118045198	1.63000731303002e-05	8.51863118367446e-05	-1.08591094725792	58.3705703139054	2.77255109890728	8.83514039180358	3.78102345559793e-16	1.6509506996962e-14	9.00954092705391	-82.566107751007	2.77255109890728	-6.76044885783026	1.30112733146056e-10	1.32782307510337e-09	-0.933136910869889	-27.6245739404051	2.77255109890728	-2.59320742096582	0.0101682528880558	0.0281260920981846	-3.93631663449114	-83.1239902425422	2.77255109890728	-6.49837754822793	5.66519713269517e-10	8.48296534005664e-09	-1.42668336435096	-58.0369138533623	2.77255109890728	-4.73340383036917	4.02480761877424e-06	1.20659851045014e-05	-2.70102586670005
237	LRRC47	24.6118771936157	5.54315417959638	11.67222763775	1.18008155766832e-24	3.77098687701832e-23	30.5831249881361	25.5724152262372	5.54315417959638	11.8100598750401	4.38877955488154e-25	1.20113966765179e-23	30.5859280363398	-10.663543120803	5.54315417959638	-3.84288827445788	0.000160514681574985	0.000671157879100085	-0.753608166068799	15.329273068565	5.54315417959638	5.68056950231388	4.37613465522236e-08	3.59701743539718e-07	4.05714412953027	-5.30612578251683	5.54315417959638	-1.76790322234054	0.0785098127108479	0.12926773998447	-4.13099508906144	-9.48673865771364	5.54315417959638	-3.02450285952526	0.00279672842107453	0.00966019720322845	-2.54514162300254	-14.7410920070568	5.54315417959638	-4.31783983183705	2.41507357934334e-05	0.00013510240463417	-0.489313243622266	-5.18411734978691	5.54315417959638	-1.75499385177212	0.0806991833503832	0.113736436802807	-4.14096395364361
238	UTP6	20.9805888479275	5.94723066357652	11.4415970445776	6.14236094309535e-24	1.7307539209116e-22	30.5130742511792	21.2174083514548	5.94723066357652	11.1410413334878	5.21294847753754e-23	1.10437278857462e-21	28.3690877668108	-9.1282604685182	5.94723066357652	-3.93069035068965	0.000114541613712747	0.000498423758415303	-0.321624717552542	7.83605313779891	5.94723066357652	3.19257229676867	0.00162366782728646	0.00429077383787413	-1.99660897910445	-4.09730386720111	5.94723066357652	-1.60508379594562	0.109958097850054	0.171823608715287	-4.28314391661599	-5.56949342692591	5.94723066357652	-2.05486106237532	0.0411137398096766	0.0876357710867711	-3.82043332108322	-5.5505881147582	5.94723066357652	-2.07956371532218	0.0387633755429718	0.081592091299282	-3.78452411599666	1.84033007768367	5.94723066357652	0.783368223071523	0.434281741385338	0.501633998530721	-4.91209447643212
239	TUBA4A	81.0832436593382	2.77886092064545	14.9527183459886	4.93450472291155e-35	7.62847757163624e-33	30.5109868328689	86.0898892089951	2.77886092064545	15.7263890621017	1.71947054796139e-37	2.91640413496224e-35	32.2220547702147	-8.28311370358701	2.77886092064545	-0.964931475594623	0.335674225364927	0.45748309961577	-4.6413565116539	50.0469292234333	2.77886092064545	7.31059054751214	5.30280816920806e-12	1.04773964517686e-10	4.90061336188124	57.8867165139056	2.77886092064545	8.16022045730207	2.89604107474925e-14	4.51372069415959e-13	6.35835809595038	-50.4420850334968	2.77886092064545	-4.18987105829646	4.08986783582284e-05	0.000282195947176196	-3.06698764036248	-60.8938976263475	2.77886092064545	-4.69266757180504	4.82355263356568e-06	3.1883771611148e-05	-2.90492106246248	37.5737658647639	2.77886092064545	5.23437417021784	3.9607237975851e-07	1.38353222120224e-06	0.290372692924831
240	ZNF90	34.1103019625807	5.03448230673216	12.0302847646457	8.99477533711484e-26	3.47635911677682e-24	30.4802023259522	32.8382867637383	5.03448230673216	11.207996805307	3.24111614693692e-23	7.07602456506838e-22	26.2986646929796	-1.76017338441048	5.03448230673216	-0.482299813583056	0.630088605062815	0.728396689765421	-4.96756539940148	28.71203732668	5.03448230673216	7.80861787214745	2.59474316352609e-13	6.83959949095357e-12	9.81748244438371	-26.3721758276178	5.03448230673216	-5.86941836037639	1.65991607349639e-08	1.2322803297079e-07	2.52013978651087	-25.1135386617389	5.03448230673216	-4.97673629651879	1.33287162670117e-06	1.50970806034271e-05	-0.0233342172096389	-5.35852750368458	5.03448230673216	-1.21617824415955	0.225264107616497	0.336601540116604	-4.5702442440077	-54.4890558240591	5.03448230673216	-11.1809084612032	3.92853240455393e-23	6.65813491971807e-22	14.2287099058985
241	THY1	38.6444221362459	6.48772674733891	10.8409347890297	4.34773937372237e-22	9.79097213294959e-21	30.4727557079534	43.2963063876287	6.48772674733891	11.9810637516008	1.28245675140565e-25	3.76187313745656e-24	35.9954253603271	-75.9855554198102	6.48772674733891	-11.4681483980765	5.0817741700152e-24	2.38260231577762e-22	19.6385335376226	34.4079440214847	6.48772674733891	7.62041185648742	8.21878355535414e-13	2.00475232139129e-11	12.5736972134947	-19.3690872094667	6.48772674733891	-3.59774729798592	0.000399160546091018	0.00125484931225096	-1.11581105695322	-18.7962786063982	6.48772674733891	-3.02244162555769	0.00281504505441154	0.00971466528581237	-2.47963812095668	11.0456884957259	6.48772674733891	1.97584995726376	0.0494636928026134	0.0993442144771589	-3.87746727277541	8.19760073632682	6.48772674733891	1.71150873264204	0.0884439957519625	0.123532455705499	-4.17453865863591
242	SRP14	-14.851495923969	10.084579399023	-10.0133326352892	1.38149916298282e-19	2.29714395705283e-18	30.3837030597934	-16.0592845085293	10.084579399023	-10.4329329479772	7.57493366032522e-21	1.19527229067752e-19	32.5038069234785	4.14414015216879	10.084579399023	2.80000571056977	0.00558029262270669	0.0154385846683832	-2.26738997449991	-8.43077726380299	10.084579399023	-4.71551522615704	4.35845128376191e-06	2.22890847949201e-05	3.45057939074639	9.36093735954244	10.084579399023	5.6138441705653	6.13192110744227e-08	4.13371699877075e-07	7.11887828163722	13.142014566653	10.084579399023	8.03043616269964	6.54332258010197e-14	2.86803104660408e-12	18.6857764919309	3.04276268890196	10.084579399023	1.76783834648932	0.0785206924204791	0.144440701284818	-4.24628332550821	18.4674257164289	10.084579399023	12.0310475340957	8.94544831134365e-26	1.8080552770631e-24	41.9531258597723
243	GOLGB1	-23.5458692554123	6.93193060910501	-11.3201782157174	1.45959086222217e-23	3.89224229925911e-22	30.3558103081768	-23.2203525352767	6.93193060910501	-10.6903101702588	1.25327516917555e-21	2.20237602693829e-20	26.6214121533915	7.07519014511913	6.93193060910501	3.33643045768794	0.00100134447668358	0.00344157078899086	-1.23606736331198	-1.66443337290675	6.93193060910501	-0.67424303034386	0.500888462204185	0.587809083240039	-5.01751420336221	5.59007234977795	6.93193060910501	2.34192375642358	0.0201084819432336	0.0402662407545234	-3.30013581509913	14.2747486802552	6.93193060910501	6.01833551997672	7.61398010914311e-09	1.41863082163839e-07	6.32445953297355	-2.86638852900742	6.93193060910501	-1.1361578444864	0.257168179958268	0.373730180223905	-4.72228622355171	11.4411260428593	6.93193060910501	5.06150558349972	8.98456141567627e-07	2.97577830328131e-06	3.40221166662635
244	TPGS2	-23.4827602517946	6.92385952098417	-11.4316438184529	6.59452301692334e-24	1.84905253219615e-22	30.3523027354709	-22.1063800875422	6.92385952098417	-10.3086635881508	1.7970398855889e-20	2.73743492558415e-19	24.4537330221902	3.07979715778778	6.92385952098417	1.49602962163812	0.136127272821919	0.225564310701441	-4.44554002594241	-1.11127150139377	6.92385952098417	-0.47135582891747	0.637869447362097	0.712619773224843	-5.10259659462783	9.03241216797195	6.92385952098417	3.86097652775343	0.000149806611179708	0.000522336980157227	-0.224863086178706	14.3851516219254	6.92385952098417	6.47850644156057	6.32436437779301e-10	1.49176759756602e-08	8.16205165122139	9.28161275579176	6.92385952098417	3.9679405296788	9.90887631964307e-05	0.000472519987897944	0.0413034360176097	13.7937467627137	6.92385952098417	6.40619266737721	9.4231401291625e-10	4.61673332238197e-09	8.11716590840707
245	BBX	-31.2854294428727	6.55716984454028	-11.8191402670256	4.11158074362726e-25	1.42968035583878e-23	30.3050474912964	-28.5822004818555	6.55716984454028	-10.5312916491972	3.81463151043467e-21	6.21643653552317e-20	24.2620339909162	7.87509310001982	6.55716984454028	3.12331461985155	0.00203705198369859	0.00644465561214378	-1.76469957189963	-6.5239798897412	6.55716984454028	-2.13501049893958	0.0339031789454539	0.0613496309927226	-3.65169181182653	20.5248800128501	6.55716984454028	7.42872645166353	2.61793918808564e-12	3.32031311659643e-11	11.337339391463	9.03147796145779	6.55716984454028	3.13538139248613	0.00195866194050484	0.00720022255763989	-1.91356141519433	11.4817888172049	6.55716984454028	3.81639187686115	0.000177517482171355	0.000790502139369521	-0.525774211527413	2.48126837254335	6.55716984454028	0.853851933788652	0.394147007557331	0.461613612454532	-4.90902726232051
246	HPDL	54.1298120564496	4.11858279611508	12.9311681967206	1.31038663133093e-28	8.27887953643562e-27	30.2563214261693	31.5151455291466	4.11858279611508	6.68273312362398	2.02022939322387e-10	9.03495866242418e-10	6.37467893753168	-15.5872843562905	4.11858279611508	-2.66428839869504	0.00830595654830762	0.0215954870255998	-3.26158116146964	14.7758830576612	4.11858279611508	2.550152027425	0.0114706458275884	0.024038136704087	-3.38647398543917	-19.3646413672584	4.11858279611508	-3.17819864045965	0.00170246315980409	0.00458910898872733	-2.66612664039281	-44.9976684286079	4.11858279611508	-5.96188205812981	1.02468128302246e-08	1.87557662044431e-07	0.738150965137412	23.5871076222964	4.11858279611508	4.1509382320324	4.78935592417756e-05	0.000246802845822483	-0.926412320768118	-67.5966500878014	4.11858279611508	-9.58164119033224	2.62400667890931e-18	3.00787939947119e-17	8.34779372770837
247	NIFK	20.3672493276409	7.07563023460783	10.6563248800651	1.59050798616226e-21	3.38020999031068e-20	30.1034821002017	18.0751026792966	7.07563023460783	9.07402415346081	7.84696711819171e-17	7.58186687771226e-16	21.5941512981351	-18.8018842296888	7.07563023460783	-7.29473973065518	5.82674781482795e-12	8.36361292366772e-11	11.0402803510195	16.3145498895082	7.07563023460783	6.69044306424796	1.93421377222412e-10	2.73854029136683e-09	9.2009006558347	-1.33765220357476	7.07563023460783	-0.519146549636315	0.604197952356328	0.688723054499441	-5.10998114050287	-12.1657018043318	7.07563023460783	-4.07672737013904	6.45100858354249e-05	0.000414837201774739	-0.0284933151928772	8.7124409619416	7.07563023460783	3.3278765294236	0.00103101397349446	0.00371702961404989	-1.43650726939801	-6.9127773832544	7.07563023460783	-2.69423979338797	0.00761783091447833	0.0133152002538781	-2.68698091192395
248	CHD7	-60.1043076020572	6.35080823741721	-12.7095790328069	6.57202947122828e-28	3.59732139477758e-26	30.0942101842045	-71.4364308965168	6.35080823741721	-13.1522898923442	2.61382432504794e-29	1.30009349037167e-27	27.4943088786783	16.9274649672148	6.35080823741721	4.4405035199432	1.4414076018884e-05	7.61297459169129e-05	1.6680714074007	-19.1409868158426	6.35080823741721	-3.76523097065841	0.000215284542234139	0.000720976335819246	-0.874868499764485	29.806024959436	6.35080823741721	7.26886528867436	6.79384016663165e-12	8.20713109886654e-11	11.1108474350279	8.66263787907308	6.35080823741721	1.95302068589297	0.052127974791888	0.105847360954774	-3.87747626406961	31.7485579079795	6.35080823741721	8.08598490984982	4.61991961150568e-14	1.38355707737238e-12	14.8614576165818	30.6060395561036	6.35080823741721	7.74374340154563	3.86742997839009e-13	2.76316909334217e-12	13.3723279256121
249	MT1F	73.559279495046	3.00880997014856	13.4769800587891	2.43961127385868e-30	1.91158582006461e-28	30.0242324674098	76.1995963516589	3.00880997014856	13.8510210598642	1.58031616236467e-31	1.10236688399096e-29	30.997410490108	-19.4763378482862	3.00880997014856	-2.13838175738922	0.0336253881155132	0.0706343077564215	-4.00957862951536	70.9184187498264	3.00880997014856	11.0575986938155	9.41591644047893e-23	1.06651568395128e-20	17.9386774890391	-13.627123811832	3.00880997014856	-1.30311719137155	0.193942746527528	0.276715517619721	-4.51971963367021	-30.8497398792123	3.00880997014856	-2.12833048128766	0.0344594512747874	0.0757816460176024	-4.29249554102737	-53.3925118348369	3.00880997014856	-3.15659323413223	0.00182758674745833	0.00611511915499367	-4.0039200170537	22.137995029008	3.00880997014856	2.62085578539632	0.00940343353860546	0.0161306462260678	-3.52382568656683
250	USP28	34.293645484934	5.67648550644095	11.3548926970439	1.13986614859571e-23	3.10477827141307e-22	30.006006522163	35.9147754036823	5.67648550644095	11.6304945911002	1.59138428462979e-24	4.08193637133741e-23	30.7882040232528	-13.8437412911717	5.67648550644095	-3.35246250088941	0.000947869655013708	0.00327657095326143	-1.74395908691197	33.9762126167005	5.67648550644095	9.21526415765085	3.07139062808838e-17	1.58273462996987e-15	17.2459086460525	-14.5060946529053	5.67648550644095	-3.15062278147777	0.00186363468586952	0.00497085120222599	-2.31473745145251	-9.77434156689937	5.67648550644095	-1.95094414852392	0.0523762043704512	0.106275945015602	-3.9850591050419	-12.6671610697945	5.67648550644095	-2.71485068050255	0.00717464971534791	0.0197445255577532	-3.00655823642559	-0.367768690245302	5.67648550644095	-0.0872202346824099	0.930578459065386	0.945468017352596	-5.05088490689634
251	FERMT1	81.1893793200583	2.68876258952654	15.1866942537662	8.89635746270437e-36	1.56575891343597e-33	30.000763355029	79.4110030459563	2.68876258952654	14.6105984401289	6.05083432088587e-34	5.96737453714951e-32	27.8821824045928	10.2390816840907	2.68876258952654	1.42311811389522	0.156166049055715	0.251271392573471	-4.44851310052397	70.2948538988114	2.68876258952654	10.7415545552551	8.74629567409729e-22	8.700662827102e-20	12.9007017277572	-36.9971622344469	2.68876258952654	-3.59071665556021	0.0004094468646011	0.00128365912059101	-3.26974826866382	-60.866784622692	2.68876258952654	-5.6153778615658	6.08474577792897e-08	9.43218044708772e-07	-1.64380497071419	-78.8642400518265	2.68876258952654	-6.97743449189913	3.74790925172189e-11	6.9717206243412e-10	-0.535243143326053	-66.8995938235532	2.68876258952654	-5.03240322033187	1.02929205670469e-06	3.37546665106611e-06	-2.87278398116079
252	TDRP	46.8742203030116	4.03682939914242	13.0930005375281	4.02824264803243e-29	2.69491788850824e-27	29.9961994151837	49.8764095206322	4.03682939914242	13.7145307908105	4.29207393631818e-31	2.82191527767126e-29	31.6476731630598	2.96780331507182	4.03682939914242	0.651662912402281	0.51532170148083	0.629434151712651	-4.8428096890758	39.0810279031553	4.03682939914242	8.84987806885416	3.4332593007474e-16	1.51063409232885e-14	11.309204012462	-35.2093627452981	4.03682939914242	-5.90602164624802	1.37219136585281e-08	1.02936847379385e-07	1.00736492457105	-13.0874139241383	4.03682939914242	-2.14751852191819	0.0328823576943117	0.0731679628885028	-3.98800980241909	-45.0710122207011	4.03682939914242	-6.64274383816617	2.5304354808229e-10	4.08295936538984e-09	1.23345378441452	-16.6178407428889	4.03682939914242	-2.98218349423785	0.00319564634475003	0.00597844549205894	-3.08717456588281
253	WDR12	25.737881668379	5.52622698067343	11.5712255162784	2.43241930213055e-24	7.34218385656292e-23	29.8971659632457	28.3663016258088	5.52622698067343	12.5256511064704	2.49934875356048e-27	9.1642787630551e-26	33.6325147891656	-10.2852859062149	5.52622698067343	-3.51455599188999	0.000538056655355988	0.00200631295217487	-1.455650221491	14.1080632743038	5.52622698067343	4.88962463596657	1.98895803441299e-06	1.11541210342159e-05	1.74063270907215	-7.70617781590367	5.52622698067343	-2.49153581802079	0.0134828917410746	0.0284741151039124	-3.26187706449985	-17.8865232194253	5.52622698067343	-5.08831591361195	7.92297910526068e-07	9.58127705752455e-06	1.17645368086549	-3.66110751393524	5.52622698067343	-1.08286305593573	0.280094462228724	0.39953624038611	-4.66331977864522	-16.4439147273071	5.52622698067343	-5.23085739042472	4.02806085464712e-07	1.4040528999745e-06	2.15341679298027
254	H2AFY2	-65.5018696529847	6.25211567900281	-12.8277918604989	2.78151142407127e-28	1.62349442302935e-26	29.8952491117754	-87.4450016451156	6.25211567900281	-14.5321214613548	1.07541287667901e-33	1.04260367027186e-31	30.0819178593954	31.8994173968597	6.25211567900281	8.43107222469271	5.17743106904804e-15	1.06913017021497e-13	17.3897250092608	-36.9243277010721	6.25211567900281	-6.08571938381541	5.32860282251528e-09	5.45252381838773e-08	4.22116922762597	11.5345045052814	6.25211567900281	2.44898572570604	0.0151345467349396	0.0314284288705226	-3.15831384670195	22.7363479570579	6.25211567900281	5.34310624875235	2.3425752627082e-07	3.26419744279925e-06	4.27625563621094	23.8065782194391	6.25211567900281	5.52342622962889	9.64315896297883e-08	9.47931514291023e-07	4.80735771007011	-4.65528034372711	6.25211567900281	-0.941415401313863	0.347559301982485	0.414779721956982	-4.83635218508594
255	CCDC169	65.2896510080182	3.0976624771716	14.4326108595341	2.22990247440236e-33	2.5510084307163e-31	29.8935279630364	69.4209334396422	3.0976624771716	15.1914801676115	8.59010562804739e-36	1.18398564319111e-33	31.6668652982876	5.0702437399842	3.0976624771716	0.77474892482294	0.439347877739317	0.559267800304639	-4.72038499458015	59.0365084402338	3.0976624771716	11.1573094909397	4.6447797971038e-23	5.77568270422473e-21	16.1624459804342	-15.0551658009435	3.0976624771716	-1.97470467274296	0.0495945576819289	0.0874883176378206	-4.18008089061154	-12.8092032408588	3.0976624771716	-1.41785130780869	0.15769656575507	0.252951305697982	-4.49051591335055	-23.9128971920228	3.0976624771716	-2.69458355800799	0.00761024093326788	0.0207832791302422	-3.85098801807644	-43.0886200377302	3.0976624771716	-5.04070024934859	9.90218255270628e-07	3.25894615658688e-06	-1.68138919570945
256	GALNT3	89.24055439711	2.45337533913347	15.5692759292022	5.41867012132511e-37	1.16961483373508e-34	29.8667471106011	85.8199554264233	2.45337533913347	14.7542484017449	2.11192322928131e-34	2.19640015845257e-32	27.2816781360416	12.7328079244611	2.45337533913347	1.57005350872593	0.117888108445324	0.200600916349026	-4.37977643557566	84.7939037541778	2.45337533913347	12.8550506833637	2.28095026998058e-28	6.86686081278364e-26	18.6412333951635	-60.3149214570381	2.45337533913347	-5.28552638122008	3.09662374200295e-07	1.84315169659281e-06	-2.00169376802835	-65.578237863371	2.45337533913347	-5.10564162062529	7.30278735375132e-07	8.92562898791828e-06	-2.58802100592411	-64.5202548403281	2.45337533913347	-4.9150595134486	1.77051319219343e-06	1.29671388724026e-05	-2.79396558630326	-55.2189949168516	2.45337533913347	-3.70697294680551	0.000267513590435399	0.000598193016923565	-3.76324404323219
257	IGDCC3	-62.5976565810352	6.43808364151882	-12.7031872776219	6.88459092618451e-28	3.73268816092658e-26	29.8061194038688	-84.6489485762704	6.43808364151882	-14.2039370249774	1.19136594291763e-32	9.66611800494873e-31	28.6768761240964	-12.0059783462525	6.43808364151882	-3.01384376278912	0.00289264374693495	0.00875071836624388	-1.98951656808759	-33.5251546770677	6.43808364151882	-5.897807177187	1.43218013671311e-08	1.31811269219613e-07	4.03415385414212	63.4762474752267	6.43808364151882	17.0746672920457	9.52141551208475e-42	9.63937995205749e-40	56.8070004066452	25.9121377310348	6.43808364151882	6.43536802989903	8.02552391676095e-10	1.83447241385022e-08	8.32543115307587	58.0778270061424	6.43808364151882	15.7782719418509	1.17724258663674e-37	5.85550225701059e-35	51.6236589654763	33.8253480376866	6.43808364151882	8.6013026636542	1.73093844104639e-15	1.53622465210013e-14	17.4220111187223
258	NUP35	30.6999479438679	4.66193165963712	12.3515461478913	8.82842290871717e-27	3.99198253263733e-25	29.7356136980517	40.3572768750723	4.66193165963712	16.2037882517823	5.2890988613256e-39	1.16360174949163e-36	43.8701334476414	-14.9029995398977	4.66193165963712	-4.42522494076165	1.53802009851432e-05	8.08591448851281e-05	-0.159978670804339	15.8087071735423	4.66193165963712	4.92373773650651	1.70143844489252e-06	9.70311854913779e-06	1.14428322401908	-17.2568788056261	4.66193165963712	-4.75769370761541	3.61099780371741e-06	1.79920796491843e-05	0.171426905519893	-17.7865283920843	4.66193165963712	-4.46460663937984	1.30074030471159e-05	0.000107455793654537	-0.797957184052572	-5.85830979583092	4.66193165963712	-1.56950595727825	0.118015556465863	0.201356892762039	-4.33604002522001	-30.6030163575613	4.66193165963712	-8.07832706153026	4.84735428670819e-14	3.79820089314669e-13	7.38280574563392
259	FGF4	107.107369068704	1.95764582926024	16.5259091792184	5.08049715933566e-40	1.6144690973e-37	29.7258817252253	111.811253725651	1.95764582926024	17.0664066394238	1.01073782304325e-41	3.61338771737963e-39	30.4214642458314	-60.2590766451441	1.95764582926024	-3.80626301125852	0.000184457023247753	0.000760976684440784	-3.71252227971101	91.4912719025206	1.95764582926024	12.0428352408333	8.21659207398042e-26	1.64908444432168e-23	14.7778746405577	-54.2332365168375	1.95764582926024	-3.6236024382901	0.00036338612237387	0.00115251933461521	-3.71741811782627	-54.9303916796062	1.95764582926024	-3.71406586090088	0.000260568137335508	0.00134821324790511	-3.65289093503128	-65.2264553979013	1.95764582926024	-4.03839383395452	7.51185532543278e-05	0.000370607145449167	-3.63385999620971	-50.1699486513429	1.95764582926024	-3.49409521308937	0.000578580355016702	0.00123258086804303	-3.72304303539374
260	SVBP	-26.6760891352239	6.4049134685253	-11.7277137033284	7.92693910607048e-25	2.59840066972626e-23	29.7016887496575	-28.0340892665617	6.4049134685253	-11.5045148378391	3.91918868938703e-24	9.55981206963488e-23	27.1634546362869	5.72287029117967	6.4049134685253	2.58034983916661	0.0105425639980034	0.0264008844265817	-2.87052999224222	-10.4624246035465	6.4049134685253	-3.812964908325	0.000179837234648579	0.000612120786783618	-0.714079267330358	25.8239471557007	6.4049134685253	10.9091013139757	2.68909351866067e-22	8.81467904111119e-21	25.3639228746278	9.26369161067534	6.4049134685253	3.73841390578094	0.000237999611277847	0.00125297540405824	-0.624515988915184	5.50056505380257	6.4049134685253	2.15958420533968	0.031922860078362	0.0692658284272053	-3.60972795981961	37.4208980806991	6.4049134685253	17.2992659135767	1.88061214553896e-42	1.19523349694254e-40	54.2132971651311
261	UFC1	-24.8088954278455	7.51350337638094	-10.8941165786372	2.98885129646389e-22	6.83849176630937e-21	29.6635176583654	-33.4521494571889	7.51350337638094	-13.5013662159941	2.04121299929359e-30	1.23653018481594e-28	40.1023582714065	11.2776132398913	7.51350337638094	5.32938212881372	2.50417272527403e-07	1.85422239334207e-06	5.2253871086666	-5.5191218048713	7.51350337638094	-2.03004080757275	0.0435966796344207	0.076330886902016	-3.76120784663206	4.59766387043634	7.51350337638094	1.77068563769678	0.0780443619073935	0.128593907564537	-4.11119083732836	11.3416110009033	7.51350337638094	4.59641182145382	7.36451418327447e-06	6.66023722827844e-05	2.22108029787275	9.0089096105284	7.51350337638094	3.76914429672873	0.000212146457634987	0.000921395396865698	-0.0842438759146047	1.12133809355628	7.51350337638094	0.451640805987896	0.651987651471534	0.707257607892504	-5.20965573701756
262	BOP1	27.6548482406304	5.34595615825284	11.6232703667145	1.67588906183765e-24	5.18166780200615e-23	29.5859278990937	28.236594993597	5.34595615825284	11.4051621942366	7.96578370885103e-24	1.87122311353708e-22	27.7566690541256	-19.3923387406676	5.34595615825284	-6.08553722529111	5.3337651051452e-09	5.14487966297311e-08	4.64411391874618	14.5565933569682	5.34595615825284	4.75146318030995	3.71304498428537e-06	1.93783004654309e-05	1.31072817366402	3.94307808500358	5.34595615825284	1.26986453612076	0.205519484411217	0.290264555761027	-4.56822433968165	-20.7564397282521	5.34595615825284	-5.29985761619878	2.88941880698613e-07	3.93511323237159e-06	1.25456629992262	3.02721754902493	5.34595615825284	0.89749741707932	0.370467648768332	0.49551618168008	-4.77674264781435	-7.19034795780113	5.34595615825284	-2.22524299066551	0.0271142815236984	0.0425212618786925	-3.61324235037034
263	DPPA5	130.132572605844	2.00344135890583	15.7474888277907	1.47393574521644e-37	3.30624018142668e-35	29.5296553978451	140.195929640839	2.00344135890583	17.0269844929727	1.34414189693511e-41	4.65969190937505e-39	32.6403241853713	-60.1860098327867	2.00344135890583	-3.24046085154273	0.00138488231352182	0.00458685141481015	-3.82071104128809	100.227543520148	2.00344135890583	9.96857067844284	1.87868128115629e-19	1.38658799073729e-17	10.2858300200575	-45.8835427050315	2.00344135890583	-2.53511702326761	0.0119594123514319	0.0256882608524936	-4.12967836463783	-62.1925654804593	2.00344135890583	-3.11602824344189	0.00208578030844213	0.00758224554451157	-3.96372228407976	-58.8439901286725	2.00344135890583	-2.88130831341872	0.0043657376674321	0.0129455777385752	-4.0838230742156	-38.218310458896	2.00344135890583	-2.12124762777461	0.035057829137442	0.0535391223244342	-4.2935653138977
264	RNASET2	37.7954710343824	5.20311416666283	11.4928631061057	4.25943269620666e-24	1.24623810855765e-22	29.4576435191057	38.6574196571331	5.20311416666283	11.5173968399161	3.57448688450712e-24	8.77513518428358e-23	29.1129097529328	-0.160355790945551	5.20311416666283	-0.0366140981075325	0.970827019866152	0.980685307485103	-5.04812991835676	28.7680567841717	5.20311416666283	6.70885190990726	1.74314094191132e-10	2.50207432565439e-09	6.89953539907625	-50.4330436728831	5.20311416666283	-8.74102382679633	6.989989026172e-16	1.27944759135052e-14	8.93807441828364	-10.9803871825928	5.20311416666283	-2.13391930879816	0.0339935150069915	0.0749298288400737	-3.79504291108025	-42.6644125290847	5.20311416666283	-7.01364661060011	3.03804776564492e-11	5.74934729703214e-10	4.19718420138654	-64.7306093598893	5.20311416666283	-10.4201505784373	8.28006903348003e-21	1.17087749991362e-19	11.6268476350177
265	ATP2B1	-44.3031575547668	6.90425976137275	-11.5003050972176	4.03887134951564e-24	1.19084248037265e-22	29.441729304985	-54.8516273703886	6.90425976137275	-12.949922713633	1.14305106197598e-28	5.20976260916543e-27	33.1302028903655	17.762593406044	6.90425976137275	5.30579655738778	2.80756084700888e-07	2.06417069985743e-06	4.80968752497114	-15.1880815737632	6.90425976137275	-3.40810342973474	0.00078224656743209	0.00225129578149009	-1.41557568816879	0.780584259569466	6.90425976137275	0.18952748351258	0.84986003775301	0.890003554732189	-5.17662861185599	16.2797972067773	6.90425976137275	4.20334941914174	3.8713143774258e-05	0.000269390732833036	0.842250930108764	3.91649873056894	6.90425976137275	0.99107470498906	0.322774478014766	0.445582240676835	-4.86778323087997	10.3303019882336	6.90425976137275	2.63665279186271	0.00899003028020948	0.015467881847736	-2.77537077277206
266	LITAF	32.2799387359896	6.47534628931358	10.7674308766079	7.29220001081773e-22	1.61047814910724e-20	29.4400331604331	31.8774939059591	6.47534628931358	10.2419480549462	2.85359332744815e-20	4.22317046132042e-19	26.2677876711384	-20.4208881527427	6.47534628931358	-4.91929641466199	1.73645697790814e-06	1.10916068270626e-05	2.32151876658389	35.0604124360354	6.47534628931358	9.68221571005703	1.32709790690205e-18	8.62613639486335e-17	21.2823841706802	-16.1103204638048	6.47534628931358	-3.64888521635375	0.000331340418606035	0.00106028933953931	-1.04303369743046	-1.14758026422152	6.47534628931358	-0.245127278228908	0.806594066046129	0.861974415279562	-5.0399488327605	22.9827326671219	6.47534628931358	5.37366473046115	2.01835918452271e-07	1.83108874472163e-06	3.4758580124659	-0.594758633367568	6.47534628931358	-0.143719018163747	0.885858334570986	0.910122976874008	-5.12936796481815
267	NDN	-37.0877461930668	6.40724069450812	-11.8720989593295	2.80976632291958e-25	1.00245465413284e-23	29.410200706904	-40.957287019757	6.40724069450812	-12.1730660028031	3.20988819829141e-26	1.02572963654899e-24	28.7345470105835	-1.80049827357834	6.40724069450812	-0.611368323312214	0.541608197943353	0.652622475718555	-5.09396637234785	-25.6758732643092	6.40724069450812	-6.69580432379568	1.87653535356065e-10	2.66677819189241e-09	6.74959095620425	17.5218872781106	6.40724069450812	5.49431467715636	1.11443503787706e-07	7.18261230045834e-07	4.33610078881345	30.7969539220525	6.40724069450812	10.4290537488685	7.78236223925985e-21	6.27780022502653e-19	24.4792967600497	9.63928229521611	6.40724069450812	2.96146027498869	0.00340946845897903	0.0105076290869397	-2.25874366603551	30.0224632749386	6.40724069450812	10.3601607196879	1.25676390161224e-20	1.75120329286772e-19	24.5246368067675
268	FAM89B	-54.6050318959596	5.19821305199641	-13.9274447929665	9.03026613444092e-32	8.39888167300847e-30	29.3700891713552	-61.9667143458982	5.19821305199641	-13.4238483641034	3.59744206090383e-30	2.089072953134e-28	22.6399883971441	16.6789286047366	5.19821305199641	5.0379551208467	1.00298416657645e-06	6.67101096839217e-06	2.62515800425187	-44.833642435357	5.19821305199641	-8.79839663905487	4.80780419892187e-16	2.05997303504368e-14	8.67119159011623	42.8316323989173	5.19821305199641	12.2538193479009	1.79062470390079e-26	7.44899876822727e-25	27.2919966571276	16.036911197494	5.19821305199641	4.2578268132902	3.09647263292424e-05	0.000223493040508854	0.0771256544312058	24.8194799900484	5.19821305199641	6.85055420679787	7.78219800628057e-11	1.38457768572083e-09	7.5187534116153	60.8518548150465	5.19821305199641	19.9248220940726	1.50891626965256e-50	1.41491820695289e-48	58.8362053755984
269	MIB2	31.7948406062057	5.03774689247116	11.8226544359565	4.00905383685376e-25	1.39827975285387e-23	29.3386852846564	32.3217293971322	5.03774689247116	11.6002324288142	1.97643629292165e-24	4.98027118745016e-23	27.5784664912912	-5.03756966211102	5.03774689247116	-1.43220754710169	0.153551418100303	0.247901245140765	-4.43414977139142	26.8241229608575	5.03774689247116	7.91810035085983	1.31787441999163e-13	3.7042956670035e-12	10.3972431407927	-5.85520310568588	5.03774689247116	-1.55847914271586	0.12060539628033	0.185696599387211	-4.32993799595024	-10.0882742433366	5.03774689247116	-2.59294469098489	0.0101757806810683	0.0281389729251684	-3.23971203411402	-27.8227641972282	5.03774689247116	-6.20497734068602	2.81533872186335e-09	3.66827733235953e-08	2.77454286090271	3.38104930270445	5.03774689247116	0.940090656027632	0.348236757625345	0.415414859982685	-4.75892639867566
270	TLE4	-48.9788464573655	5.9289546051832	-12.5754842484318	1.74084214264226e-27	8.89072951420868e-26	29.333498891275	-70.6360072109501	5.9289546051832	-15.2828278712528	4.402141611204e-36	6.14152439416753e-34	32.4236911729655	-16.962282830981	5.9289546051832	-4.56028914149491	8.61751300004247e-06	4.77406047072571e-05	1.3983123731232	-26.9021878696604	5.9289546051832	-5.89648038102797	1.44210715946347e-08	1.32511694010137e-07	3.91669392658659	-12.9223216564549	5.9289546051832	-2.84397753538849	0.00488982574545921	0.0116419576541214	-2.75396845439283	58.3400525388564	5.9289546051832	17.7731322504563	6.21559452984755e-44	3.5553200710728e-41	54.8940179131069	-11.5074062928685	5.9289546051832	-2.7650718437431	0.00619074163026176	0.0174400050863969	-2.76685729140162	16.8257675749432	5.9289546051832	4.39176886667804	1.77175614369238e-05	4.82248162832283e-05	0.845277223083628
271	PNO1	24.2865362973115	5.67953133766869	11.3259270053384	1.40105284766949e-23	3.76245177871807e-22	29.3295428846007	23.7992279099769	5.67953133766869	10.6435271721052	1.73973036918383e-21	3.00188769584661e-20	25.4633288634513	-5.24290994677756	5.67953133766869	-1.90250343545774	0.058455316593328	0.112656472679864	-3.9614213150555	13.3404919904869	5.67953133766869	4.7408874463214	3.89266645266378e-06	2.01776638960007e-05	1.41868568247032	-3.79842080986135	5.67953133766869	-1.2693786576837	0.205692310739066	0.290439725407442	-4.56485239565609	-20.6883944595608	5.67953133766869	-6.15030637103328	3.77561443623981e-09	7.48579361361932e-08	3.93761220075284	-2.50534207813209	5.67953133766869	-0.792190418066158	0.429131718662066	0.552658658279189	-4.82980047980137	-10.6533984291578	5.67953133766869	-3.52446030217652	0.00051941171504753	0.00111504410210992	-1.54065670702608
272	SIRT1	40.1731870641043	4.37966688364004	12.3639703399457	8.0688422238914e-27	3.6629982159253e-25	29.3268536789277	31.8878051230214	4.37966688364004	9.36010205868815	1.16665150880817e-17	1.25436966736517e-16	16.8886573614392	-6.81100688344605	4.37966688364004	-1.53221099810785	0.126955399632317	0.212895011989695	-4.355513687117	32.3594191060542	4.37966688364004	7.64583002061732	7.03987990008906e-13	1.73944332736542e-11	8.05911822213256	-8.31314816763069	4.37966688364004	-1.67792218655164	0.0948300553920502	0.151389315334225	-4.2620583721083	-21.3087581713311	4.37966688364004	-3.62480802722732	0.000361794006903798	0.00177941678374009	-2.49331012324866	-8.39553039093809	4.37966688364004	-1.62730799256493	0.105151187730019	0.183934187711227	-4.30789924616842	-4.67627763102771	4.37966688364004	-1.03406726181625	0.302278233020991	0.366630935725205	-4.67391644674595
273	LEFTY1	111.7410593194	2.62432696793739	13.9474330719727	7.80055198483556e-32	7.31461595955072e-30	29.3034056711563	112.990571779276	2.62432696793739	13.7692368436761	2.87589220770713e-31	1.92398870503916e-29	27.9655437299905	51.9612500458274	2.62432696793739	4.63226619610521	6.29532843963527e-06	3.59194799747768e-05	-0.781696356605018	76.5298287614696	2.62432696793739	7.36519485886429	3.82963410895679e-12	7.85143623771787e-11	5.25832517819596	-48.0201784208103	2.62432696793739	-2.65731543180894	0.00847398774427824	0.0189414653760342	-3.98922403218132	-52.8940502903383	2.62432696793739	-2.93436365302705	0.00370883827802035	0.0122312893254705	-3.83300998382782	-54.2694862600713	2.62432696793739	-2.70886232862967	0.00730094815786682	0.0200535046641048	-4.05720432434531	-48.2043547227928	2.62432696793739	-3.17850171310053	0.00170076580610795	0.00332651065513335	-3.41874832600434
274	GTF2H5	-22.0229935791752	7.10916623565264	-10.9838018357128	1.58689557229966e-22	3.80588791343984e-21	29.2850444423126	-26.7290292721894	7.10916623565264	-12.7099076863681	6.55634676728884e-28	2.66697712825971e-26	36.2943728975509	8.74231944076097	7.10916623565264	4.40485270399178	1.67655255306345e-05	8.73793221277715e-05	1.76395334182241	-6.87550047798525	7.10916623565264	-2.81229772687947	0.00537885937372753	0.012373647945997	-2.51454535364352	2.65415653035089	7.10916623565264	1.13339804382508	0.258322205180144	0.349772535611585	-4.7511252976873	9.59133790092618	7.10916623565264	4.27300358671369	2.9085641261151e-05	0.000211936137597177	1.03902019427651	8.60105962383192	7.10916623565264	3.79246625244509	0.00019432353553618	0.000853054967971567	-0.260029549662068	-3.97276986765807	7.10916623565264	-1.68398718365234	0.0936501099149752	0.130113827717673	-4.20865201241824
275	ATAD3B	35.3644100182918	4.57840584112593	12.2185211081306	2.31121092700961e-26	9.68507436080219e-25	29.1885158952952	37.4375821938264	4.57840584112593	12.5735570484104	1.76536801459826e-27	6.68735433344505e-26	29.7795729660331	-4.85669469343061	4.57840584112593	-1.27075047544155	0.205204630541057	0.311138631330641	-4.54604818831636	18.17705740425	4.57840584112593	4.67137325994931	5.29987829076796e-06	2.64531446973758e-05	0.382233962731017	-16.3151659571584	4.57840584112593	-3.66668061677964	0.000310402680663827	0.00100112959311931	-1.95241475419386	-29.0733735260696	4.57840584112593	-6.34231029625704	1.33707831099211e-09	2.91355731004756e-08	2.92119305657977	-8.89759999220373	4.57840584112593	-2.06324620784328	0.0403026451765532	0.0843355150575761	-3.91859888252094	-34.3172820163969	4.57840584112593	-7.6240951552234	8.03657618661114e-13	5.55855088118690e-12	6.0121080503794
276	ZNF770	24.2889929739244	6.20347300798731	10.9456045831104	2.07838404792541e-22	4.89232788235939e-21	29.1828578128241	22.6875471744778	6.20347300798731	9.86094647663856	3.92638036051094e-19	5.0640125506477e-18	23.4890744127555	-15.1150935172557	6.20347300798731	-5.24242169588278	3.8107244442479e-07	2.74352974463159e-06	3.25054601395336	30.1207526960398	6.20347300798731	11.2682599745816	2.11192533003287e-23	2.8093518343693e-21	26.8374603017988	1.49819449575874	6.20347300798731	0.497684273328191	0.619220392031877	0.70102734139977	-5.02622947191819	-3.14835322946592	6.20347300798731	-0.959245127128086	0.338523683933149	0.457118855547123	-4.77610216299617	-10.4522458900548	6.20347300798731	-3.01453637801595	0.00288632058180339	0.00905884978212093	-2.4835604975291	2.53728259864221	6.20347300798731	0.876045448733252	0.381992957079548	0.449680945563905	-4.87796985023956
277	SRSF5	-24.8233546343018	7.88833510531664	-10.5620802768	3.0762578952225e-21	6.25086861835621e-20	29.1509048404249	-21.9910890320488	7.88833510531664	-9.0484525405749	9.29341640742179e-17	8.91170860862576e-16	21.1993273162545	2.6049205832172	7.88833510531664	1.12136994079135	0.263394012603362	0.378831720415195	-4.90923935336119	-9.11854622385122	7.88833510531664	-3.20901589736349	0.00153767671563707	0.00410238377492727	-1.56563819034923	13.922012293767	7.88833510531664	5.35505866820673	2.21014144339566e-07	1.35064199318624e-06	4.91259410603718	10.9834956417652	7.88833510531664	4.16456066662602	4.53253034913862e-05	0.000308460126080582	1.02273386192964	9.23230167097481	7.88833510531664	3.49167783894845	0.000583552767861414	0.00225840448725798	-0.800395889433125	12.5973678020422	7.88833510531664	5.06487822785877	8.84379667200345e-07	2.93085266302779e-06	4.06415755882378
278	NKX1-2	106.449194100209	2.17895475198259	15.7005809229282	2.07612381802324e-37	4.56747239965112e-35	29.1108832084684	104.451027166155	2.17895475198259	15.0535874483511	2.35736860656104e-35	3.09980423667336e-33	26.7050597603537	40.0312949255881	2.17895475198259	4.38144000131023	1.85055570570801e-05	9.57068592825481e-05	-1.56198050342169	87.7361506487908	2.17895475198259	11.1911916189259	3.65194870900581e-23	4.69419025067713e-21	13.9577923109695	-71.1252056770072	2.17895475198259	-4.66042731090006	5.56206069308078e-06	2.66568807410323e-05	-2.99669289055035	-69.2319786960301	2.17895475198259	-4.72156265983093	4.24277947142523e-06	4.13084231090252e-05	-2.84374200383944	-51.3408542639675	2.17895475198259	-3.859273662868	0.000150785060874218	0.000682890378622747	-3.22329108598331	-46.9204987513164	2.17895475198259	-3.28205703107399	0.00120437779558389	0.00243214156778106	-3.72339611621584
279	TSC22D1	-35.9294903072427	7.29446036815153	-11.0648684540442	8.94356445577649e-23	2.20505123651041e-21	29.0369769519052	-46.1069095233736	7.29446036815153	-12.7261206151668	5.82736457442574e-28	2.39802340760541e-26	33.9015906969605	-5.59773552067016	7.29446036815153	-1.77542574014388	0.0772566352508091	0.14165986652817	-4.11767206038587	-14.337289406829	7.29446036815153	-3.83876375885387	0.00016305592994369	0.000560168119686432	-0.258139902892281	-8.29398194445761	7.29446036815153	-2.22751206599598	0.0269600133918234	0.0517409635088081	-3.48027047907405	16.2735004642126	7.29446036815153	4.91694969825639	1.75524077361996e-06	1.91602618799736e-05	3.17091811328217	-0.317242309187463	7.29446036815153	-0.0856797379326507	0.931801554128524	0.954752331323808	-5.19446462636832	21.2703370314565	7.29446036815153	6.69736067587207	1.86011079576249e-10	9.87913997378034e-10	9.86732249194504
280	ENPP1	53.1561467942628	3.64997783623343	13.32952194999	7.1667794506007e-30	5.22216286081987e-28	29.0300237928913	55.1445300607902	3.64997783623343	13.4871416578977	2.26493685282205e-30	1.35659045006724e-28	28.7440472487439	-19.6848825348578	3.64997783623343	-3.35671032286805	0.000934154242116082	0.00323742033620357	-2.63422780249607	54.0521401705038	3.64997783623343	11.2444385499225	2.50171264460111e-23	3.28960835106169e-21	17.4849458215574	-32.1254646626969	3.64997783623343	-4.47078811612379	1.26684765594694e-05	5.64358924611875e-05	-1.84482575803069	-35.1484971545692	3.64997783623343	-4.57800571414023	7.97929072698222e-06	7.14265148017814e-05	-1.96796279049217	-20.5334007512703	3.64997783623343	-2.86765934969166	0.00455109940610437	0.0134221647862423	-3.51585080906925	-66.3691709516838	3.64997783623343	-8.27029025850574	1.44339306666474e-14	1.19137205502486e-13	2.51607093158403
281	SLC25A19	51.4451120516815	3.55162951889793	13.2923644348384	9.40139873073995e-30	6.76427682262044e-28	29.0138567484566	47.9807656524297	3.55162951889793	11.8808650867886	2.63808326542619e-25	7.45177100159891e-24	23.1475463510444	-6.33474479640757	3.55162951889793	-1.19888625628861	0.231905278771933	0.343188906631185	-4.57034646076013	34.8969156258387	3.55162951889793	7.27734173787752	6.46074825229804e-12	1.25698911575322e-10	6.18446053251324	-20.1137754442425	3.55162951889793	-2.95935002668568	0.0034319622058331	0.00853885333508713	-3.39647637584413	-31.7112572194593	3.55162951889793	-4.79384957460743	3.0701786053037e-06	3.10787865394202e-05	-1.192945514185	-20.5522320031422	3.55162951889793	-3.09430361944328	0.00223752889515091	0.00728438547539168	-3.23065686086146	-55.5103181820813	3.55162951889793	-7.51517930611221	1.55560780308192e-12	1.03888810667001e-11	2.01256433851056
282	REXO2	20.9602002893335	6.76981988741134	10.5858382228837	2.60539080009443e-21	5.33196256763511e-20	28.9986156083028	25.6698948857004	6.76981988741134	12.7594476407695	4.57322076990954e-28	1.92344285322666e-26	39.5944241480982	-15.0350830648549	6.76981988741134	-5.81018292488759	2.2549774289925e-08	1.97677714848078e-07	5.53683223625584	15.362328195609	6.76981988741134	6.0305841503468	7.13709798793267e-09	7.11843077436353e-08	6.38806682442902	-7.81681373079022	6.76981988741134	-2.78285515655525	0.0058728036322244	0.0136972219271452	-2.6236542833279	-9.23707487273078	6.76981988741134	-3.070712787215	0.00241380649481423	0.00854286844164151	-2.19421791653199	-8.93086777934958	6.76981988741134	-2.91776639205566	0.00390390154799389	0.0117986884064357	-2.49169190121473	-8.17540356399664	6.76981988741134	-3.01190424575916	0.0029104181991641	0.00548606696222437	-2.15958311653528
283	PRDX1	22.4473319546884	10.6289765407148	9.6490157265819	1.66249803062725e-18	2.40442193051527e-17	28.9755111222619	21.9928773439028	10.6289765407148	9.08445937791883	7.32308134892211e-17	7.10413801708277e-16	25.4351944990141	-1.00740663672664	10.6289765407148	-0.395513833001707	0.692859860229676	0.779228942295271	-5.66181623748446	15.6751562219475	10.6289765407148	6.05661929945314	6.21855652721433e-09	6.2678666670777e-08	9.35023804863357	5.4239993356193	10.6289765407148	2.02494320961721	0.0441221174728099	0.0790907276541751	-3.87867655577427	-7.10964505542998	10.6289765407148	-2.32339055041446	0.0211020909184577	0.0511457457854143	-3.27753181559181	-16.9443828710127	10.6289765407148	-5.35658331790852	2.19378129478694e-07	1.98080963002073e-06	5.83452350303211	5.13009526548487	10.6289765407148	1.98181997591942	0.0487862486623729	0.0722946482768841	-3.97147936792005
284	TMEM98	-36.1322922939091	6.54271858349191	-11.7367327366805	7.43020654426468e-25	2.47097566472058e-23	28.9597870882619	-40.4460251587284	6.54271858349191	-12.0197946702518	9.70134134500422e-26	2.88726464255301e-24	27.881290151181	13.2385634112432	6.54271858349191	4.97225011448935	1.36080269963051e-06	8.85813398705594e-06	3.43740609214646	-12.2028090819169	6.54271858349191	-3.4735220850892	0.00062219879338994	0.00184737975509497	-1.38281628220011	-7.85016907581137	6.54271858349191	-2.27250600186649	0.0240548043997134	0.0468562850898554	-3.46660893777428	17.9210997899603	6.54271858349191	6.1796451889553	3.22611449544936e-09	6.53216811113994e-08	7.1809472890246	11.5675070137556	6.54271858349191	3.78209952517517	0.000202063537325636	0.000883641768732904	-0.384168166639062	5.90612962721239	6.54271858349191	1.95105654073002	0.0523627435572062	0.0770456316777413	-3.87322392825036
285	VSNL1	65.522715191637	4.1223266107584	12.3053079150666	1.23379018922085e-26	5.4904663483677e-25	28.9305703729162	63.5817010340275	4.1223266107584	11.7546690666083	6.53274647777353e-25	1.74206572740628e-23	26.4304285066156	17.8969867028698	4.1223266107584	2.45578670719619	0.0148590608954761	0.0352598333632539	-3.4489663783423	42.7661695283864	4.1223266107584	6.19763201611513	2.92885396004954e-09	3.18801991464955e-08	4.095343157593	-29.6165619277115	4.1223266107584	-3.1822336075291	0.0016799934772675	0.00453923603683046	-2.95377706330513	-71.191386320087	4.1223266107584	-5.79366106313713	2.45522729591857e-08	4.16732941621787e-07	-0.833928427855806	-41.6552807192563	4.1223266107584	-3.96020584472734	0.000102124620370332	0.000485781977977794	-2.35606747291832	-13.6972315501681	4.1223266107584	-1.62584059247746	0.105463307590411	0.14468164514142	-4.30952565968117
286	WDR43	22.4681184593391	6.25769403218421	10.8549768376708	3.93830838268194e-22	8.92163324710523e-21	28.8812488592439	23.8023868739367	6.25769403218421	11.1679645572629	4.30655147429636e-23	9.17447837354755e-22	29.8189286896312	-10.9762551374474	6.25769403218421	-4.1051222835311	5.75896468637256e-05	0.000268360716953573	0.208513615232658	20.1227336019201	6.25769403218421	7.72063261996376	4.45639546040323e-13	1.14537658574424e-11	11.9700880840162	-5.53947972838827	6.25769403218421	-1.91950815777428	0.0562572744876713	0.0974709867908088	-3.93956476483202	-10.2977077591509	6.25769403218421	-3.30018904687931	0.00113276096106317	0.00460347616147874	-1.91076417619585	-0.159963103581862	6.25769403218421	-0.0526915999789148	0.958027053764979	0.971960756923675	-5.06078886346898	-8.7436180909188	6.25769403218421	-3.04546258970297	0.00261660130032624	0.00496334254281748	-2.23236851511004
287	GRPEL1	22.5533119217707	5.95128052931006	11.1094515605921	6.52156840501786e-23	1.62896817802193e-21	28.8577128869065	19.6346318780403	5.95128052931006	9.18065251995184	3.86725111619361e-17	3.8910600500664e-16	19.3526073649234	-4.11564363444347	5.95128052931006	-1.64350526568386	0.101754820842901	0.177612931102043	-4.24619075056352	6.28406649660164	5.95128052931006	2.33862950708935	0.0202820308699564	0.0393465207991014	-3.39857027620312	-9.74610879047906	5.95128052931006	-3.49729516161066	0.000572059310916104	0.00174237447201284	-1.47347550515475	-12.3472989179574	5.95128052931006	-4.10890380161169	5.67232961049121e-05	0.000373583481543002	-0.434606785539532	-8.26734370240207	5.95128052931006	-2.7955313886764	0.00565530007795197	0.0162106321452695	-2.81283968296029	-10.9954405215369	5.95128052931006	-4.018842540934	8.1149685230869e-05	0.000198408292165236	-0.322967962556631
288	IDH2	-50.4486252910281	6.14662921062565	-12.3983867754513	6.28849402892202e-27	2.91256565550072e-25	28.7323883763284	-67.0256530387101	6.14662921062565	-13.7946016093624	2.38854861893503e-31	1.6362273174022e-29	27.9879236670159	6.04604905486591	6.14662921062565	1.76233865065684	0.0794474957524592	0.145118849019341	-4.11877556295901	-35.510992448105	6.14662921062565	-7.0908332209126	1.93771430476206e-11	3.43149406292229e-10	6.82613888376755	16.9550013866479	6.14662921062565	4.22799790799204	3.50018855184003e-05	0.000142043834810394	0.432031649099504	11.8965512623059	6.14662921062565	3.07237649178989	0.00240096712433166	0.00850552273534398	-2.06508383179588	33.2170250584161	6.14662921062565	9.03746717071626	9.99337660303145e-17	4.78344051626275e-15	17.5996751593438	20.2190036105078	6.14662921062565	5.54591001855989	8.62049335988559e-08	3.31379180232161e-07	4.63751704831027
289	NIP7	22.195580996919	6.05989525446231	10.9190255338437	2.50725583789211e-22	5.85367485418076e-21	28.5745695323773	21.044667345541	6.05989525446231	9.9649926946782	1.92537608777786e-19	2.58524676574867e-18	23.5145976240297	-10.4297893437784	6.05989525446231	-3.97245100523858	9.7358216429215e-05	0.000430528796269895	-0.209555764536412	10.021748658439	6.05989525446231	3.77559018659495	0.00020707163922633	0.000696530300720145	-0.691630474216502	3.05285709404655	6.05989525446231	1.1319335060248	0.258936075623236	0.350352301020676	-4.6942633756052	-7.75756096657564	6.05989525446231	-2.56668436875145	0.0109538813459043	0.0299545833792062	-3.14234734300395	-0.928846628714527	6.05989525446231	-0.313548786416161	0.754170832824546	0.830706174418718	-5.01616214574335	0.453879853678981	6.05989525446231	0.171497642322535	0.863995425573361	0.892873321459733	-5.10586378742465
290	PAICS	15.2992221166842	7.90776489939925	10.0509724739332	1.06642976175928e-19	1.79411124625384e-18	28.5259598789352	12.8461926675062	7.90776489939925	8.06922886225545	5.13201191019519e-14	3.5646761537725e-13	17.7947065922447	-12.3451855650446	7.90776489939925	-6.36744137266	1.16544411887441e-09	1.22995209593388e-08	8.80073390892646	15.0434205619806	7.90776489939925	7.76734727894847	3.34539320992111e-13	8.71783560854156e-12	14.7192138038726	-5.13257303286274	7.90776489939925	-2.48064756475887	0.0138895120986793	0.0292249436102431	-3.01021664546567	-7.55659136342898	7.90776489939925	-3.30734750557107	0.00110559446170843	0.00451495331039127	-1.43120123210227	4.96327472384528	7.90776489939925	2.40288782627239	0.017124165642732	0.0409576531367038	-3.14798620750909	-16.6070137137821	7.90776489939925	-7.75403111996097	3.63067375403745e-13	2.60243782870855e-12	13.6892663418478
291	CDH2	-91.1152475923807	5.96743534581522	-14.6984151282448	3.17942032205736e-34	4.22936842841119e-32	28.513060104607	-103.987140170103	5.96743534581522	-15.0443281872278	2.52274515596674e-35	3.24271961620893e-33	25.4241697570749	63.5858721576936	5.96743534581522	17.8208965411436	4.41212077047676e-44	1.14715140032396e-41	61.412693701254	-45.8327083385176	5.96743534581522	-7.39880005895276	3.1323773797985e-12	6.57511875686145e-11	7.39687229109881	26.9510109753348	5.96743534581522	5.73247987246661	3.3596698396998e-08	2.37104398310708e-07	4.82663758313166	46.2381813842642	5.96743534581522	11.4028292205078	8.09942979984309e-24	9.75341862212683e-22	29.2963398591899	2.26759787111552	5.96743534581522	0.454249105861138	0.650112441668197	0.749575320770427	-5.03767366933726	24.2337287728964	5.96743534581522	5.40339646352144	1.7450397273598e-07	6.43768283811547e-07	4.06494128305653
292	PHC2	-98.0617597548787	5.03404248386322	-17.3886719499883	9.87047661874966e-43	4.90948923993461e-40	28.4955742448682	-115.035972192988	5.03404248386322	-17.3614546650714	1.20098511403416e-42	4.73767920846579e-40	22.0147426782394	22.7113203388171	5.03404248386322	6.18370590224846	3.15652193300564e-09	3.16204999243297e-08	6.27518635795282	-69.9915152987281	5.03404248386322	-10.5465908139588	3.42796602225505e-21	3.18828709712177e-19	10.0303394073223	48.0733197937768	5.03404248386322	12.4519056359876	4.26680337617724e-27	1.85597835070219e-25	28.64982113472	23.0126772680082	5.03404248386322	5.69771862431303	4.01093856398502e-08	6.4809515779645e-07	4.0951999985754	40.3773261983899	5.03404248386322	10.2946533624849	1.9804653278289e-20	1.69078532465393e-18	20.2567857328497	50.7722088940754	5.03404248386322	13.9285221060871	8.95930052467519e-32	2.67609394261839e-30	35.8849092429752
293	PRDM14	107.021923790379	1.6371687170633	17.2630069040418	2.44293170282306e-42	1.11788554721183e-39	28.4348152362036	104.882287406174	1.6371687170633	16.6566662515131	1.9661198609417e-40	5.48595395345685e-38	26.6472205454258	-48.9264699459732	1.6371687170633	-3.54557952355822	0.000481661000685341	0.00181974961949812	-3.79825810206434	85.6794461138102	1.6371687170633	11.8581641675946	3.10590915330829e-25	5.46640010982258e-23	12.9195648048988	-43.57732983552	1.6371687170633	-3.08719510807371	0.00228935355660973	0.00597813391636962	-4.02409660256448	-49.4142356551349	1.6371687170633	-3.29414827299723	0.00115616795853961	0.00468358450015278	-4.00388101686943	-34.3230951441811	1.6371687170633	-2.41245778881959	0.0166930720896342	0.0400942147187519	-4.27403098063877	-56.4551794134826	1.6371687170633	-3.73514258796914	0.000240920638758264	0.000544259894825147	-3.83661462136411
294	MSRB2	-29.2981697384779	6.42655818799098	-11.3663837381074	1.05025205633336e-23	2.88126703224308e-22	28.3460086842797	-35.3290459749702	6.42655818799098	-12.5404163038211	2.24542135979933e-27	8.34013647925465e-26	31.0225310951454	12.3856512234532	6.42655818799098	4.8927184379269	1.96105588213515e-06	1.23742301663685e-05	2.85559696086124	-15.2284065051343	6.42655818799098	-4.80623418769767	2.90360512260091e-06	1.57278610807549e-05	1.63788269658626	1.42247890762707	6.42655818799098	0.483390144990641	0.629315652449239	0.709891999430006	-5.05204769895061	12.6671210364709	6.42655818799098	4.54856172918859	9.06670760232605e-06	7.95422814191795e-05	1.48433694830577	10.4210829583154	6.42655818799098	3.77102203958288	0.000210656106196071	0.000916662554158633	-0.489797887514031	19.4900858805377	6.42655818799098	7.32661758905151	4.82036269291339e-12	3.07728511199382e-11	11.0571801008228
295	CCDC50	-36.3578668456781	5.58265335798269	-12.4408176269433	4.62391124688789e-27	2.19491886574263e-25	28.3120938218357	-46.1976884045117	5.58265335798269	-14.2994098434874	5.91854119658506e-33	5.16855811365902e-31	31.4397795008892	8.8706382238936	5.58265335798269	3.2245334931301	0.00146042025174004	0.00480522840237226	-1.77806766669643	-27.8821949798373	5.58265335798269	-7.54043906160246	1.33530062263048e-12	3.03694614769239e-11	7.5371094527837	38.8867591580149	5.58265335798269	14.1038840162753	2.47978336873644e-32	1.43276372415883e-30	36.2128035020936	7.84395687884681	5.58265335798269	2.46085483573996	0.0146566701556189	0.0380468133833176	-3.26976666695922	10.2887835630678	5.58265335798269	3.22450860745125	0.00146054121189646	0.00503119285278395	-2.03832288735332	26.6001162720784	5.58265335798269	9.4817092318095	5.15202595019571e-18	5.77269117240342e-17	18.0442021368326
296	VENTX	85.6764301128834	2.40755149340523	14.8505016483582	1.04332383661912e-34	1.55008112869126e-32	28.3059706867301	86.5453403744966	2.40755149340523	14.7887275850947	1.64046447601252e-34	1.80007346998221e-32	27.629448349956	40.5413487602266	2.40755149340523	5.45941363605206	1.32459187015454e-07	1.02664844136639e-06	0.545129284027105	67.8412508379481	2.40755149340523	9.70486344696162	1.13782872130241e-18	7.49772163349269e-17	10.2494138607571	-54.2934853758046	2.40755149340523	-4.2626539458266	3.03548119704041e-05	0.000124733853786431	-3.12879113038887	-73.140246587273	2.40755149340523	-5.08983510846286	7.86661596125339e-07	9.52318376685066e-06	-2.90503919708328	-63.4956272714019	2.40755149340523	-4.44040630701374	1.44200347908623e-05	8.49460339894258e-05	-3.2841722261709	3.17345143730761	2.40755149340523	0.356686481756513	0.721679888828811	0.769648357248214	-4.76600579936361
297	ARMT1	29.6877444649071	6.39164618471581	10.5360144327455	3.69084912014136e-21	7.31773205102551e-20	28.2747605245008	26.8611444329118	6.39164618471581	9.01763243787102	1.13923382971036e-16	1.07531642012265e-15	20.2052323711827	4.06165335828398	6.39164618471581	1.1259719958121	0.261445382111989	0.376549813843782	-4.74641231876176	16.3343114882305	6.39164618471581	4.35210823116058	2.09308426949128e-05	8.95135852074028e-05	0.920141191202018	-12.8120928463176	6.39164618471581	-3.00623382641531	0.00296296138158669	0.00750914448501366	-2.34899998854747	-9.85202311202586	6.39164618471581	-2.14477445245855	0.0331040123015173	0.07346457822102	-3.70607088191196	-18.0958052400622	6.39164618471581	-3.90260593820396	0.00012767768282158	0.000588964794951158	-0.818199660634894	-2.79502627676886	6.39164618471581	-0.709695491550059	0.478669763091675	0.543953719059179	-4.96170018970956
298	WSB1	-31.1235771702097	7.41518079355395	-10.6958841407667	1.20521362054138e-21	2.60635989016888e-20	28.2676394373192	-32.0863034480337	7.41518079355395	-10.0513368114598	1.06375936761701e-19	1.46515195580282e-18	23.6944638680625	3.31763784836818	7.41518079355395	1.16416088022395	0.24566212362031	0.358969816607019	-4.82106540992335	-3.59143661976489	7.41518079355395	-1.07639781345952	0.28296796913323	0.36987586458914	-4.8135103683941	14.4114383300733	7.41518079355395	4.43718608933138	1.46187640462426e-05	6.4273120941205e-05	1.57470058923464	9.9183809244085	7.41518079355395	3.09196385403988	0.00225446623152014	0.00807485713481228	-1.82587748432238	3.58690262725915	7.41518079355395	1.03897729495709	0.299994162205171	0.421096100076952	-4.82518451186477	21.5834370146785	7.41518079355395	7.26099680347821	7.1181803267674e-12	4.47182772862268e-11	12.2655979437883
299	CRLF1	77.291775740179	2.74159069772594	14.4191654551928	2.46081179046982e-33	2.73317348378395e-31	28.2514011838057	81.2084387078271	2.74159069772594	14.9604563624472	4.66261906346751e-35	5.67450660490089e-33	29.2483354831717	27.1953805017062	2.74159069772594	3.81936852857254	0.000175525576299604	0.000727804491796837	-2.0705102529332	63.8428536711708	2.74159069772594	9.82311207935233	5.0844496508975e-19	3.50398216905225e-17	11.0764450187936	-40.3902615746304	2.74159069772594	-4.09964738132578	5.88663473646308e-05	0.000227280126173262	-2.70313092963485	-44.5140419929889	2.74159069772594	-3.98216565247251	9.37280636931299e-05	0.00056732753896794	-3.12385243829439	-44.2526300747631	2.74159069772594	-4.2662534953961	2.99075053898274e-05	0.000162383417968498	-2.69803972257771	64.9254750119823	2.74159069772594	10.3673188856685	1.19576841581499e-20	1.67027969193206e-19	13.1488440337971
300	GFPT2	52.5044311874688	3.67911630854061	12.8760912607696	1.95700683300847e-28	1.17924488406978e-26	28.1689425674715	57.3659004100859	3.67911630854061	13.8217010765381	1.9587237542192e-31	1.35804846959198e-29	30.7555712284759	-40.0871740183519	3.67911630854061	-6.07298638931987	5.70150002470424e-09	5.46732273953198e-08	1.24470991994474	44.4153727640762	3.67911630854061	8.89732454580633	2.51534567111147e-16	1.11967138044806e-14	10.9854560402162	-38.0982567426243	3.67911630854061	-5.11398935775646	7.0210452393428e-07	3.94696597238731e-06	-0.985668915434128	-26.1169030751774	3.67911630854061	-3.57609851654573	0.000431637603994996	0.00205404916376986	-2.78786652752765	-13.4290511415938	3.67911630854061	-1.91831551189722	0.0564091438908356	0.110477127835106	-4.17594067378886	-32.0819529390453	3.67911630854061	-4.69751649195113	4.72100834975548e-06	1.39773125054872e-05	-1.15795016641046
301	POU5F1B	77.9908661821954	2.33949893680885	15.2891511660177	4.20310077521744e-36	7.88253653581762e-34	28.1367489547656	78.4809981461172	2.33949893680885	15.0458709083656	2.49440655383079e-35	3.24271961620893e-33	26.7267830157454	-32.5316876149222	2.33949893680885	-3.43612701308452	0.000709472957440959	0.00254919425512496	-3.42058009085559	51.1409846007008	2.33949893680885	7.87673771657794	1.70326027192502e-13	4.63935655019578e-12	5.00260779264864	-34.3165502844364	2.33949893680885	-3.51761073104066	0.000532240147892687	0.0016292179451723	-3.41652634006141	-32.3084040455899	2.33949893680885	-3.49095110364639	0.000585055439735645	0.00265955133896587	-3.33803256754557	-27.8876154140831	2.33949893680885	-3.10628905634658	0.00215259406911293	0.00705202638907557	-3.57189846624123	-31.6531069553554	2.33949893680885	-3.43697958206889	0.000707361569115572	0.00148617380177817	-3.36978272441562
302	NPM3	22.8844916105492	6.54249073119823	10.5108942468433	4.39850372913151e-21	8.6607371189784e-20	28.068067579671	25.1483102255918	6.54249073119823	11.2041977972276	3.32976082814062e-23	7.23860660576329e-22	30.9280694567946	-6.18423056755846	6.54249073119823	-2.24952023516201	0.0255029067141448	0.0559987049538995	-3.44718957171378	21.6243251158704	6.54249073119823	7.85718130952733	1.92242439160344e-13	5.22388005699368e-12	13.0230969403073	0.442871245885711	6.54249073119823	0.151264369046379	0.879910448561137	0.912708277640529	-5.14160428415895	-5.94037182571181	6.54249073119823	-1.81431816594647	0.0710367788299957	0.135398325527349	-4.06491521228583	-11.9594638542812	6.54249073119823	-3.59817955691542	0.000398536121939831	0.00161104354593345	-1.25096478295701	-17.5004349486885	6.54249073119823	-5.6837347780679	4.30637067388343e-08	1.72980619765542e-07	4.41614776117219
303	SURF6	27.8840687609365	5.05132539790097	11.4601374850806	5.38092471035293e-24	1.54223823256457e-22	28.0627225912601	28.3784901921757	5.05132539790097	11.326754357113	1.39282314955438e-23	3.18677936618043e-22	26.8448748812825	0.702150212196883	5.05132539790097	0.228558396748828	0.819431612631074	0.875611586820427	-5.03119931265339	21.9602210062112	5.05132539790097	7.08206901538277	2.03952276000348e-11	3.59509096678579e-10	7.72841846722759	-9.65474019165673	5.05132539790097	-2.68768171038085	0.00776394160639205	0.0175151827996697	-3.1270287723176	-16.5134877000933	5.05132539790097	-4.24677070657782	3.2406178232015e-05	0.000231199711606457	-0.850285458896641	-9.30067127255842	5.05132539790097	-2.50179702805505	0.0131094192738008	0.032844104285407	-3.40223678224661	-24.7663890761222	5.05132539790097	-6.99440923351355	3.39684326865388e-11	1.96361227859527e-10	6.07310513738485
304	MTHFD2	31.5404044363854	6.0374903939457	10.7324588943939	9.3232713412996e-22	2.03546229283335e-20	28.0592300243482	32.6864060030876	6.0374903939457	10.8310398835352	4.66146395119271e-22	8.61504807781012e-21	28.0409458015914	-19.5754801367574	6.0374903939457	-4.66267872219647	5.50713251643863e-06	3.18189878727565e-05	1.18196955594413	33.8697768062573	6.0374903939457	9.46393575754284	5.80722610822751e-18	3.40690598349347e-16	19.0840381293724	26.2743282475505	6.0374903939457	6.99113325880843	3.46197249599166e-11	3.80451156139717e-10	9.01192009783792	-16.8468285503813	6.0374903939457	-3.41208974447208	0.00077148515649126	0.00333930767698071	-1.9756700621769	0.0104552228686678	6.0374903939457	0.00239124766712616	0.998094301986991	0.998356108658842	-5.04502590734816	-4.68914872471179	6.0374903939457	-1.15055384234391	0.251206852229036	0.312608113727855	-4.67287598899032
305	INTS13	30.6159420968957	4.85486905639828	11.709651997292	9.02350740493215e-25	2.93263990660295e-23	28.0388850679172	30.6053710617603	4.85486905639828	11.2172249788484	3.03546549474004e-23	6.6397180229113e-22	25.0768083482518	-16.0001875777917	4.85486905639828	-4.52493105580525	1.0041238590263e-05	5.48313935430116e-05	0.198664241566933	27.137288722041	4.85486905639828	8.23880617961705	1.76234478666843e-14	5.81015111224405e-13	10.9545245448897	-8.26090324932677	4.85486905639828	-2.22671931804203	0.0270138231753244	0.0518172597460951	-3.69585708229235	-17.7054915980263	4.85486905639828	-4.45253643165866	1.36944874063449e-05	0.000112224166137955	-0.453758601487271	4.28816494914312	4.85486905639828	1.16101606169365	0.246935861782408	0.362072413819813	-4.61064639912502	-24.8483767540179	4.85486905639828	-6.4707516145309	6.60156532406694e-10	3.29071491535189e-09	4.18921057454956
306	PFDN5	-13.2911289456003	9.51252871383111	-9.67416195986892	1.40169362279981e-18	2.05581731343973e-17	27.9523534722017	-15.2154986823514	9.51252871383111	-10.6626848008164	1.52116486398893e-21	2.64872542527143e-20	33.2342797082052	3.89146730128012	9.51252871383111	2.76108194320204	0.00626418478371349	0.0170421578895796	-2.35050964716908	-1.18395354775244	9.51252871383111	-0.702483343800955	0.483145362441988	0.570872025029574	-5.28745713464245	7.62146443297175	9.51252871383111	4.77668250731324	3.3164165647549e-06	1.66275559694487e-05	3.63038454113602	6.72261482671705	9.51252871383111	4.19178061805926	4.05820248265621e-05	0.000280180062773609	1.60880018354905	3.89889036956377	9.51252871383111	2.38736099963938	0.0178445392291986	0.0424234265964322	-3.14392589381142	9.27982862871142	9.51252871383111	5.9806322271966	9.2862501876262e-09	4.02404174797135e-08	8.48711468932645
307	EMG1	24.2224987647681	6.37904830800302	10.5539754562467	3.2555556004653e-21	6.56852840728802e-20	27.8955562894549	30.2257873443499	6.37904830800302	12.9469114049988	1.16840432981365e-28	5.30418473534449e-27	39.1048774622579	-10.0555992901024	6.37904830800302	-3.3833561913855	0.000852256455527643	0.00298982332144625	-1.40394767548154	20.5586112852979	6.37904830800302	7.00865678604938	3.12735502562366e-11	5.28462946722816e-10	9.45958942283647	-11.7056649958507	6.37904830800302	-3.55502756149784	0.000465620712987731	0.00144472496788165	-1.24949773440708	-7.52516736356513	6.37904830800302	-2.18441144026272	0.030024328251586	0.0677472022087068	-3.62782507286942	-5.87679014265991	6.37904830800302	-1.69044365219976	0.0924070658851901	0.164997164620973	-4.19926685307013	-8.8346149269792	6.37904830800302	-2.82526886703552	0.00517348670476337	0.00930138109421547	-2.56900444149933
308	DDAH2	-51.328935284483	5.4924971651916	-13.2654729282085	1.14413962893361e-29	8.12978717701896e-28	27.8891790172861	-55.3200152964238	5.4924971651916	-13.0136968231491	7.18182559742343e-29	3.36721659157885e-27	24.2188599958259	20.9825359066133	5.4924971651916	6.85783630561213	7.4642245053511e-11	9.36301845846673e-10	9.14778038595231	-33.1897766691959	5.4924971651916	-7.35351971890614	4.10609690496783e-12	8.35831825495232e-11	6.69639558590683	6.49862399539816	5.4924971651916	1.73652065669107	0.0839187527914641	0.136698068052734	-4.15284957555416	13.66648380581	5.4924971651916	3.96801831067832	9.90586744839742e-05	0.000594559934993003	-0.280660798665314	9.16946756748011	5.4924971651916	2.59648525238796	0.0100747546468742	0.02639834932667	-3.00556151164547	35.6116203217626	5.4924971651916	11.1456323144844	5.04593381874095e-23	8.42707779363452e-22	25.4030329893514
309	PROCR	66.532229494045	3.42945517983058	12.9286083541847	1.33504937462597e-28	8.30052437267454e-27	27.7023069267803	66.5574250785283	3.42945517983058	12.6061138647796	1.39372449796425e-27	5.40481635820712e-26	25.8843184971903	-21.0339688577675	3.42945517983058	-2.52299375395513	0.012366974997973	0.0302110172916531	-3.68624072278756	49.9283660540468	3.42945517983058	7.70543260104537	4.89124467311048e-13	1.24623249577692e-11	7.0537948113772	-63.6152320875427	3.42945517983058	-6.2992779933604	1.69033424486853e-09	1.45832758380814e-08	0.0553309952422376	-69.4249909768634	3.42945517983058	-6.13545771622387	4.08769204247999e-09	8.02113155505508e-08	-0.85749412264693	-47.1230008040332	3.42945517983058	-4.66997997534532	5.33257676812033e-06	3.48598161298838e-05	-1.9348653959375	-71.3126920172127	3.42945517983058	-6.27474797273645	1.93113436289507e-09	9.07649018550518e-09	-0.730883736876372
310	CR1L	93.7820206527299	2.48528367116757	14.4307256681168	2.26092340809878e-33	2.56088750382674e-31	27.69215676734	98.8052628303564	2.48528367116757	14.9399555488155	5.41802877422179e-35	6.45648428928097e-33	28.3951738497877	-35.7435825329709	2.48528367116757	-3.11852400519315	0.00206896971659132	0.00652758233805975	-3.49197971494954	74.9316978871711	2.48528367116757	9.77466593879701	7.07545797219919e-19	4.81804995249755e-17	11.1587869806269	-56.6094424912137	2.48528367116757	-3.85759027352107	0.000151758273028355	0.000528819568517934	-3.41306613061473	-80.4636992975186	2.48528367116757	-5.30789508576216	2.77917911227371e-07	3.79688388844623e-06	-2.50553507003833	-57.429684506192	2.48528367116757	-3.97462008594656	9.65362683068969e-05	0.00046130948597782	-3.30695350158098	-66.7867240501382	2.48528367116757	-4.62764521247803	6.42422271785906e-06	1.86862720295722e-05	-2.85004924127827
311	ZNF292	-27.4671296659479	6.81982329189791	-10.9811761863692	1.61661444080643e-22	3.86905213448234e-21	27.6918659679355	-33.6573399034892	6.81982329189791	-12.5859108630056	1.6139323982935e-27	6.15446221215922e-26	33.1394031026084	6.45838485168363	6.81982329189791	2.66835856111799	0.00820926900578664	0.0213829775560563	-2.66680538341823	-2.01239824126148	6.81982329189791	-0.701136322797227	0.483983804123145	0.571744601318544	-4.99215713826431	14.7894797361148	6.81982329189791	5.8070321866246	2.29189117851392e-08	1.65525474003783e-07	5.94121296885302	7.72079467444061	6.81982329189791	2.72765454429262	0.00691120978752306	0.020451814066554	-2.6757839501649	6.21377554621855	6.81982329189791	2.15313200224763	0.0324329075193082	0.070178260264968	-3.60838294868538	19.9958443359743	6.81982329189791	7.94940902896179	1.08479247479816e-13	8.21312105340236e-13	14.3320898647447
312	CAPN1	26.4515024566965	5.51088604771774	11.0021583024893	1.39379351450116e-22	3.3639235877412e-21	27.5708424142489	27.0991024444315	5.51088604771774	10.9033617158542	2.80019546611493e-22	5.40206342872762e-21	26.4665421758311	33.5374110415037	5.51088604771774	12.7211915966714	6.03998186729168e-28	4.13756841687526e-26	32.7278390942605	20.8914984327681	5.51088604771774	6.8527647708323	7.68428915675749e-11	1.19278518254146e-09	7.75145117009286	-36.7982908290858	5.51088604771774	-9.69015305093696	1.25744499215602e-18	3.0348461414061e-17	13.5337102902196	-26.4637452626729	5.51088604771774	-6.19729233090984	2.93421066178929e-09	5.98348840835462e-08	2.89789220056082	-42.795141031405	5.51088604771774	-10.2642001104818	2.44597938338992e-20	2.02768145985367e-18	13.2637150307535	15.5782057791517	5.51088604771774	5.04839991758875	9.55246583592222e-07	3.14928556665563e-06	2.25895712867204
313	CCNE1	44.2994810092471	4.66215256561424	11.4487005643173	5.83869387777221e-24	1.65743568143211e-22	27.5582957793744	32.7281096763863	4.66215256561424	7.97968951712373	8.98323136678806e-14	6.04163238307204e-13	12.6784823664956	8.13113019972103	4.66215256561424	1.5779849521164	0.116054157704394	0.19818772415857	-4.31108005741911	28.6149817728257	4.66215256561424	5.71279541869405	3.71458518215273e-08	3.10009112300928e-07	3.45065860693377	-24.074858314416	4.66215256561424	-3.81875938048717	0.00017593147343214	0.000604219770658567	-1.71094326004686	-17.896021762819	4.66215256561424	-2.49567055243453	0.0133312775577419	0.0352216663419323	-3.63745389507067	11.4983352955918	4.66215256561424	1.9368121035517	0.0540921203945965	0.10700568170745	-4.02187790278124	-74.0087541692858	4.66215256561424	-9.99776798750726	1.53743012825246e-19	1.98736730702917e-18	9.02744638161383
314	SERBP1	12.7175646771325	9.45278992064358	9.56190486596357	2.99865708937266e-18	4.21951255872365e-17	27.5407402184849	11.1761376787354	9.45278992064358	8.09779628657258	4.28967903760618e-14	3.00330037883811e-13	19.2231948135434	-9.88020582350467	9.45278992064358	-6.33774475349207	1.37081881987198e-09	1.4308546805963e-08	10.0163494363475	16.3427291748283	9.45278992064358	10.5306441449421	3.83192156396673e-21	3.50697461534235e-19	31.4859014814783	-2.67956924765694	9.45278992064358	-1.59079310966719	0.113140341115368	0.176026860106053	-4.43889511541363	-4.89769888372195	9.45278992064358	-2.76877323716718	0.00612330816390709	0.0185701659581643	-2.36089802421155	1.31821746783594	9.45278992064358	0.757238075352288	0.44974473549107	0.572311432037579	-5.22671282590268	-12.5377277079174	9.45278992064358	-7.25010037154396	7.59269668888124e-12	4.7542665638096e-11	13.6280290913166
315	ATP5F1E	-24.385030935127	9.19972074626849	-9.72316446499688	1.00469625740209e-18	1.50244773655946e-17	27.4265780368618	-28.6865726522718	9.19972074626849	-10.7473452587593	8.39764564591355e-22	1.4987373820476e-20	32.3653984508516	6.16442194585147	9.19972074626849	2.49954620569946	0.0131905433727187	0.0318824881013949	-2.92754327678496	-7.55942281162281	9.19972074626849	-2.5316211535853	0.0120756889172444	0.0251419924039007	-2.85957671756166	15.1274410368521	9.19972074626849	5.45284726897947	1.36823498580563e-07	8.7075632365279e-07	6.08677693016385	16.0814937532365	9.19972074626849	6.0557489995072	6.24730038062493e-09	1.18326351580048e-07	8.72188961095877	10.6977017755378	9.19972074626849	3.76011069148089	0.000219456801794763	0.000949540776298065	0.20021971898966	16.9433059439046	9.19972074626849	6.36320891039739	1.19275309118357e-09	5.76472131945082e-09	10.0539717955285
316	SAMHD1	50.670506453372	3.5720058004791	12.7035922651599	6.86435350018836e-28	3.73268816092658e-26	27.3771663747751	54.5992754920128	3.5720058004791	13.6905022447109	5.11724042658141e-31	3.30741415141759e-29	30.6849851767676	17.7965275152505	3.5720058004791	3.47992851943463	0.000608296274607132	0.00223185034685875	-2.10194564395795	39.6237399424497	3.5720058004791	7.63093368709404	7.7088088821538e-13	1.89246295304376e-11	6.63076151643613	-32.1632206782601	3.5720058004791	-4.4195247184044	1.57563327898886e-05	6.87596449261976e-05	-1.90009319324748	-23.7828224231678	3.5720058004791	-3.17669242566039	0.0017109219925668	0.00645332924331162	-3.29209846323417	-68.4168765373895	3.5720058004791	-7.71304895329995	4.66834970345952e-13	1.23339308562533e-11	0.974132800616498	1.85048646569011	3.5720058004791	0.31481059590289	0.753213873180356	0.796153257801281	-4.84289111141408
317	NSD2	-34.8464250949112	5.54622421314533	-12.0669755023382	6.90370837257668e-26	2.71403518152155e-24	27.3338645984829	-42.6641083217372	5.54622421314533	-13.3078821377195	8.39404981281229e-30	4.48728644198937e-28	28.6430731628502	10.9397891398033	5.54622421314533	4.06217435263225	6.83573790456191e-05	0.000313247250732663	0.170137056716171	-16.4940395668149	5.54622421314533	-4.64446731123923	5.96686304098973e-06	2.94481937829691e-05	0.512589690536599	3.76978338965435	5.54622421314533	1.13872332232348	0.256098647743277	0.34770627287228	-4.65244684098396	17.0949973579797	5.54622421314533	5.62132429561217	5.90516279484816e-08	9.16622284573446e-07	3.85730334668606	30.0853212585006	5.54622421314533	10.4842962387314	5.29548608044905e-21	4.77010714648324e-19	21.5067173115787	-0.42386290205829	5.54622421314533	-0.135181542426819	0.892596097822656	0.915287687667894	-5.05496896395947
318	PTRH2	27.8504495238697	4.95108547180509	11.4844755572193	4.52244749437924e-24	1.31645799836383e-22	27.332004489219	18.5086402204174	4.95108547180509	7.14293688188088	1.42807007891967e-11	7.349132569879e-11	9.37280919767084	-7.29723849698564	4.95108547180509	-2.29887055711314	0.0224827123787926	0.0502544411124242	-3.54569845558604	11.7490593283188	4.95108547180509	3.57049179132931	0.000440444985779581	0.00135997048240713	-1.66089116828652	-6.9089635512005	4.95108547180509	-2.04860071116364	0.0417283465684886	0.07527156807687	-3.87173956757328	-16.988519216461	4.95108547180509	-4.59640649230726	7.36468539665404e-06	6.66023722827844e-05	-0.150327438877778	-3.39396160545729	4.95108547180509	-0.950867374654982	0.342750223230177	0.466515473379325	-4.71595415479067	-22.9139537452899	4.95108547180509	-6.2858982988258	1.81776961616807e-09	8.5612533589801e-09	3.61407193428214
319	SPATS2	-35.3059059732373	5.82160947163964	-11.7928168313678	4.96750384206077e-25	1.69131678432069e-23	27.3236609208381	-38.536767251731	5.82160947163964	-11.4412060040133	6.15952751550664e-24	1.46802072452908e-22	23.0991506433446	10.4392279207583	5.82160947163964	3.77253621160509	0.000209461535712305	0.000848827477346356	-0.416945140661401	-16.2527013824602	5.82160947163964	-4.45768743767012	1.3397111121743e-05	6.07463144006103e-05	0.315573903282087	3.80750906221507	5.82160947163964	1.13872237214846	0.256099043288622	0.34770627287228	-4.67124532014649	6.54748747708737	5.82160947163964	2.02585122200396	0.0440281314386959	0.0926567004522959	-3.81199900376826	16.3344015892515	5.82160947163964	5.46385392560754	1.29585139755899e-07	1.23025228116804e-06	3.9603027753416	10.4549056447161	5.82160947163964	3.36370756597586	0.000911964493633757	0.00188183149479982	-1.57126321431716
320	PPARGC1B	62.277020473352	2.54118133536984	14.6217176571928	5.57735574783085e-34	6.86074728550375e-32	27.3199872238561	65.7225891196986	2.54118133536984	15.0071994911514	3.31097145166411e-35	4.07285090398251e-33	27.2787942293627	-31.4960808033098	2.54118133536984	-4.42341370229229	1.54987719959838e-05	8.14076912920363e-05	-2.21386595625767	47.2788922474024	2.54118133536984	8.5722413241029	2.08846424384409e-15	7.99064580253389e-14	6.50921019936451	-16.7795478224815	2.54118133536984	-2.42189171096294	0.016277527470489	0.0335401502633995	-3.93035966017407	-53.1550584415618	2.54118133536984	-5.83892507875359	1.94399105361191e-08	3.33922787587391e-07	-1.83329419866434	-12.2536809946598	2.54118133536984	-1.66122881055698	0.09813978815611	0.173634267940906	-4.3854968964582	2.21031537969423	2.54118133536984	0.334351534140542	0.738443540827093	0.783705360635785	-4.76341667021103
321	RRP9	30.8899959249447	4.95404806003249	11.3108799885391	1.55947706644203e-23	4.12972630557798e-22	27.2941677416606	30.344661782307	4.95404806003249	10.6500024398588	1.66256273026225e-21	2.87741567839638e-20	23.6621592594382	0.446354273149346	4.95404806003249	0.125517474571101	0.900232371857227	0.934033950122137	-5.02049224074014	12.5647700920355	4.95404806003249	3.55063527691352	0.000473014203126686	0.00144802849445258	-1.50770681288966	-5.43257503925206	4.95404806003249	-1.37813284624448	0.169609339478374	0.246861430487607	-4.46980814153239	-18.0712514274967	4.95404806003249	-3.99943714534271	8.75897648475271e-05	0.000534699525003047	-1.42415802580889	-4.67583756450675	4.95404806003249	-1.13557716621512	0.257410693851387	0.373987596857997	-4.62072769098011	-25.224977638736	4.95404806003249	-6.21380148198049	2.68466422668364e-09	1.23741171447465e-08	3.78753369689093
322	TPD52	38.9375432673454	4.95793582457715	11.3143167628948	1.52178733638823e-23	4.03926847523929e-22	27.2759075348374	34.5849387571893	4.95793582457715	9.74981719305636	8.38038712799008e-19	1.04549213461512e-17	20.2076066906704	19.4726257941911	4.95793582457715	4.65259062146177	5.75740270033255e-06	3.30646018533155e-05	1.12228042425631	37.1191319085646	4.95793582457715	8.75813143313946	6.25262542601138e-16	2.60109217722073e-14	13.5533808406093	17.7393844057662	4.95793582457715	3.79024293843367	0.000195959490766995	0.000667195409040007	-1.18222421163268	-31.6201660459572	4.95793582457715	-4.83489839149852	2.55088453785098e-06	2.64810518266926e-05	-0.639113501010656	-54.383162793412	4.95793582457715	-7.9413054195324	1.14088345861878e-13	3.2306204867819e-12	4.56558441882911	19.6407463169184	4.95793582457715	4.41147651358335	1.63024640405912e-05	4.47028256530114e-05	0.290521803066249
323	APOBEC3C	48.0240421349766	3.92888958601383	12.3776710258743	7.30664617378217e-27	3.37048517048661e-25	27.1827229378162	43.7850039399899	3.92888958601383	11.0138960266394	1.28278443777179e-22	2.58819293970181e-21	21.7406580711597	15.4945900994854	3.92888958601383	3.18827505243343	0.00164686343515293	0.00535382713786573	-2.42775031565597	50.266414323185	3.92888958601383	10.883924351792	3.21154156542653e-22	3.37064545949353e-20	17.848673091362	-37.7725731278785	3.92888958601383	-5.64775015823388	5.16771877754077e-08	3.53580758463316e-07	0.275158598261224	-62.2591825211526	3.92888958601383	-7.5702432581333	1.11473112820723e-12	4.08734747009317e-11	1.51578364220041	-15.1226796029825	3.92888958601383	-2.26680241496039	0.0244072665056194	0.0554704191801798	-3.91070974028942	-73.4408702893504	3.92888958601383	-9.02616610780929	1.0768085875971e-16	1.06012824803019e-15	3.6347216276664
324	PUS1	35.8354057213096	4.18422997859166	12.1517285787627	3.74474362996916e-26	1.52999525453026e-24	27.1590466947094	36.9881615369122	4.18422997859166	12.2759375680898	1.5259074441234e-26	5.05982062631062e-25	27.0258089320351	-2.72635753851957	4.18422997859166	-0.704225069336219	0.482062418811508	0.599496032172255	-4.81981995551992	24.664855691199	4.18422997859166	6.4856072390495	6.080590833557e-10	7.71196886207229e-09	4.48771307022348	-23.1587953626921	4.18422997859166	-4.96980907230353	1.37623796460078e-06	7.33993581120418e-06	-0.184251580542989	-24.1353181822757	4.18422997859166	-4.95140379319992	1.49820335633212e-06	1.66888475135729e-05	-0.446911309654515	-2.02064724445841	4.18422997859166	-0.483877414595327	0.628970351682556	0.731836942966684	-4.85360720357635	-46.4055038435211	4.18422997859166	-9.25180518830472	2.40726152932546e-17	2.52189303072191e-16	7.38359613930185
325	DIAPH2	42.8668622336212	5.91258144551884	10.3641242104373	1.22261760178929e-20	2.25957114127133e-19	27.1386238634389	47.6482959396548	5.91258144551884	11.3661611434841	1.05191939638794e-23	2.44592640135731e-22	31.7846329182756	-26.9422183057774	5.91258144551884	-4.16729177124099	4.48264820322439e-05	0.000213672897687029	-0.144514226839155	41.2441128056307	5.91258144551884	7.90699232451208	1.4119595017242e-13	3.94934393636303e-12	13.092349194446	-14.7120561850644	5.91258144551884	-2.1757108902635	0.0306782285635679	0.0578281322733921	-3.68033791936986	-10.0294027561949	5.91258144551884	-1.29860470299076	0.195484854108959	0.298936870873746	-4.52162163382097	-30.3681957288471	5.91258144551884	-3.5541380282357	0.000467109231077483	0.0018567510783622	-2.13382368021387	2.63904407195068	5.91258144551884	0.44870871826139	0.654098293447164	0.70914371465462	-5.03952404486183
326	MRPL32	16.4883942320109	6.83925344079036	10.2005979879266	3.79890229515991e-20	6.6148313937031e-19	27.1207787725401	15.7668192330224	6.83925344079036	9.43512518416999	7.04960419874794e-18	7.792026283447e-17	22.8957893103675	-4.71156886362551	6.83925344079036	-2.33288720496974	0.0205876968907058	0.0465277069201252	-3.29707751802347	11.8327462691788	6.83925344079036	5.68637974342284	4.24890834817383e-08	3.50198209676575e-07	5.23275262313431	1.25808693820618	6.83925344079036	0.575147067329514	0.56579934490729	0.654804704677734	-5.0577453092792	-5.87232413227432	6.83925344079036	-2.44733154073385	0.01520223351241	0.0392050386343486	-3.21193556271974	-9.49018563398926	6.83925344079036	-3.81878742353957	0.000175912767842185	0.000783661239920016	-0.703116691075127	4.95882038188988	6.83925344079036	2.38736802412393	0.0178442073696238	0.0290091988501486	-3.22014023183364
327	PACSIN3	40.0820256116631	4.86429238815158	11.3578123599047	1.11639894401364e-23	3.0481154939179e-22	27.0615218618417	48.2381906094026	4.86429238815158	13.5935962470967	1.03980546353509e-30	6.53592005650626e-29	35.9782610516776	-7.54517867266724	4.86429238815158	-1.54373903738029	0.124137088623249	0.209026831594049	-4.342482552253	28.5427307790315	4.86429238815158	6.36810373133761	1.16122632447822e-09	1.36952877855988e-08	5.38066301498038	-25.9606343038592	4.86429238815158	-4.88442752359057	2.03669598298052e-06	1.05620136198083e-05	0.536666409566108	-32.342075725086	4.86429238815158	-5.03588944103221	1.01269542201738e-06	1.1894492431087e-05	-0.177716361804046	12.0894126715695	4.86429238815158	2.34077413496395	0.0201688979242968	0.0470785946243532	-3.57535649056574	-111.165167251601	4.86429238815158	-14.8374622661973	1.14790270465345e-34	4.45152777668999e-33	14.8701490821845
328	ENOPH1	20.3906776729294	6.30217213688855	10.4717594886799	5.77929731374834e-21	1.1186998522721e-19	27.0525109776611	18.9403369325838	6.30217213688855	9.44645760967688	6.53218903963803e-18	7.2622198846899e-17	21.7929841108828	-6.92489602988594	6.30217213688855	-2.82146739909221	0.00523292377349703	0.0145666821974868	-2.51995645083301	14.0217330999517	6.30217213688855	5.59788441170642	6.64450321107763e-08	5.2640662558676e-07	4.42609317968042	-4.24454052870585	6.30217213688855	-1.57993792675667	0.115606062732512	0.179277939224609	-4.30915401022359	-6.47701978638376	6.30217213688855	-2.17143101214541	0.0310043825754093	0.0695743696866775	-3.66972639936352	-1.39371939468965	6.30217213688855	-0.4994360986701	0.617988070217445	0.722733952493106	-4.99851099618431	2.60819761713138	6.30217213688855	1.01170173801903	0.312829429319384	0.377786199874776	-4.79089114328119
329	TRDN	86.274035509326	3.1634557409666	13.1301502971127	3.07204745242869e-29	2.07953981395173e-27	26.9909113742044	87.7701927502435	3.1634557409666	13.3910337869351	4.57239585784986e-30	2.60239843849763e-28	27.8860760895176	87.2310753447046	3.1634557409666	11.9873120004241	1.22600767085129e-25	7.08359987602969e-24	20.6035557373719	83.1504721081853	3.1634557409666	11.0934661133016	7.30376496910638e-23	8.88883736665713e-21	17.3077454052302	-68.2039017352154	3.1634557409666	-4.89731400153827	1.92030758866784e-06	9.99923478122899e-06	-2.16583908120819	-64.3650992342467	3.1634557409666	-4.18257482801765	4.21304610671596e-05	0.000289346210787972	-3.07027142399206	-56.1343808423899	3.1634557409666	-4.16239506239801	4.57246032780115e-05	0.000237121242747258	-2.7411980822858	-65.353438186603	3.1634557409666	-4.70392810421492	4.58864054674179e-06	1.36065442858284e-05	-2.33923912117549
330	MYBBP1A	35.0445572419565	4.22119934338866	11.9893764716688	1.20790689004687e-25	4.56054614591952e-24	26.9260173368543	34.8500833712892	4.22119934338866	11.5136152972939	3.67241428840411e-24	8.97701270498783e-23	24.2937498688371	-3.42603127626125	4.22119934338866	-0.905976391212312	0.365972825582748	0.488248294421766	-4.74673752304206	21.9015135524918	4.22119934338866	5.59120709146084	6.87115320374453e-08	5.40618931573847e-07	2.13248244793736	-15.7818579473645	4.22119934338866	-3.65296507982722	0.000326425724336812	0.00104690504244831	-2.01110986741172	-24.2917949058129	4.22119934338866	-4.97611028235077	1.33673560267954e-06	1.51148370051624e-05	-0.388752754997009	-14.2889775020505	4.22119934338866	-3.18078900378359	0.00168800633586674	0.00569304023653169	-2.7618254047385	-35.7098736971722	4.22119934338866	-7.68936745560625	5.39647681333733e-13	3.80145903599624e-12	5.2614604644294
331	KRT18	33.3977301104797	8.71680639586321	9.51661675203169	4.07153322081071e-18	5.59163746051314e-17	26.9197325229543	29.4063913568535	8.71680639586321	8.08489344130944	4.65167820045361e-14	3.24087689483491e-13	18.8912565711442	49.6858231521523	8.71680639586321	14.3534294995014	3.9837620373681e-33	4.29945638749916e-31	55.218846533446	24.9839627625703	8.71680639586321	5.86887905031781	1.66456834181077e-08	1.50534876128974e-07	7.6915325280327	-57.6702165443314	8.71680639586321	-9.82362565316129	5.06665399084028e-19	1.28235667378789e-17	22.111648391965	-28.9799183831456	8.71680639586321	-5.00165428268037	1.18755553708827e-06	1.36333168844598e-05	3.27809101343193	-74.6056235137579	8.71680639586321	-10.3831009310566	1.071502660603e-20	9.21653416338224e-19	20.6191304908593	-35.5622627918079	8.71680639586321	-6.5056085490434	5.44248687443755e-10	2.73799691484457e-09	8.93554760632598
332	TESMIN	57.6676347407625	3.34639400371542	13.1668172990481	2.35092582011967e-29	1.63628963874132e-27	26.8849292943791	65.335334960664	3.34639400371542	14.7859822215296	1.67379496656536e-34	1.80007346998221e-32	31.4578083242979	29.2934446849286	3.34639400371542	5.43439088209502	1.49854146322375e-07	1.15210445828493e-06	1.41307803939325	52.2052088753365	3.34639400371542	9.89311486140103	3.15087749369716e-19	2.25287740799347e-17	12.6896337664475	-59.8408732876971	3.34639400371542	-7.76897787194525	3.31202037715532e-13	4.68349976695388e-12	2.66026793561486	-28.2402256278144	3.34639400371542	-3.73179152567655	0.000243947970419765	0.00127899394207246	-2.71555851189571	-27.6013585881934	3.34639400371542	-3.43588489184603	0.000710073645348713	0.00268892502574951	-3.14124535712333	-75.9647116832567	3.34639400371542	-7.20933817173816	9.66115053977693e-12	5.97424660405665e-11	-0.651425450838255
333	RRP15	18.0435489187853	6.18969647871724	10.5422798815983	3.5327870219182e-21	7.04095531894499e-20	26.8319280387914	14.4661611582755	6.18969647871724	8.05678989026891	5.54814551470166e-14	3.82123929489386e-13	14.9945494266118	-6.40217848366441	6.18969647871724	-3.10961714483514	0.00212954326087244	0.00669082743120936	-1.94962503261523	17.7840497917679	6.18969647871724	8.27343354610103	1.41487882016903e-14	4.71901274132179e-13	13.6880326699658	-4.38258178225563	6.18969647871724	-1.8958407049094	0.0593359173648091	0.102014261294472	-3.96761315551702	-8.90499912837091	6.18969647871724	-3.56760038517598	0.000445052735824095	0.00210658739072079	-1.40138238697829	-1.76551561545187	6.18969647871724	-0.743276402723458	0.458134012935954	0.57995497487964	-4.90462917249945	-7.13845303589965	6.18969647871724	-3.20060494264402	0.0015811193738455	0.00311862166151596	-1.8916473428094
334	LYPLA1	16.4956704955839	7.19345785174411	10.0092096079941	1.42120295087096e-19	2.35631329825562e-18	26.8225167511393	14.7689232258604	7.19345785174411	8.5724457592801	2.08570963832054e-15	1.6957795675171e-14	19.1698003687399	-8.58566394508177	7.19345785174411	-4.1484373347825	4.83799092882437e-05	0.000229273472351909	0.786084491060302	19.8330490716033	7.19345785174411	9.66875685558321	1.45408035757731e-18	9.29311692217005e-17	22.0287121339498	-0.859283852426738	7.19345785174411	-0.384655593274815	0.700876672620815	0.770816106016355	-5.15145099490692	-12.9316215671665	7.19345785174411	-5.00706311868331	1.15810403611294e-06	1.33555546100122e-05	2.3614143243182	-2.16010840834134	7.19345785174411	-0.921038897673222	0.358072907756077	0.481980711228324	-4.87957657882506	2.73005479950714	7.19345785174411	1.27468627830513	0.203810154418698	0.260076761466805	-4.64795642332141
335	TMEM238	59.7077671757956	3.0483141852719	13.4417843050386	3.1554346736806e-30	2.42269615214135e-28	26.813735373405	61.3522437761512	3.0483141852719	13.4325572705261	3.37558879407486e-30	1.9702416226641e-28	25.8963320053299	36.5591365787219	3.0483141852719	6.69258411945472	1.91097327563293e-10	2.27014893803123e-09	3.96287213967005	49.3217144683831	3.0483141852719	8.74791105608652	6.68329910572e-16	2.76017840322876e-14	8.40297509929273	-58.372835579574	3.0483141852719	-7.06498933131658	2.25331280453598e-11	2.54219906152778e-10	0.865418376493632	-29.639821570765	3.0483141852719	-3.59366188102	0.00040510781063909	0.00195216232254052	-3.08746711306879	-62.2059484158451	3.0483141852719	-6.98057149192167	3.68044255982508e-11	6.8685583824468e-10	0.172787585052512	-33.9333508882294	3.0483141852719	-4.3501248563348	2.11053965935531e-05	5.69044866910788e-05	-2.18225451583683
336	PMM2	31.5592431241228	4.64082186550285	11.5978121897788	2.01097619644868e-24	6.18429238907875e-23	26.7733752135356	29.0404026393826	4.64082186550285	10.1751930854832	4.52818770405614e-20	6.49103623166109e-19	20.2336659117238	17.967691964069	4.64082186550285	5.58253745223035	7.17670813542779e-08	5.8022290508335e-07	3.31123453748821	22.1698418343669	4.64082186550285	6.44387905223971	7.65766492969261e-10	9.45693290106402e-09	5.16427266004306	-7.15226057011009	4.64082186550285	-1.8507498806461	0.0655912590514607	0.111214466214423	-4.09326595001838	-35.160542121555	4.64082186550285	-7.24756243762324	7.70762387504997e-12	2.49082534267152e-10	3.65899188377685	-14.4061376947171	4.64082186550285	-3.36228852550702	0.00091642441745143	0.0033505577934306	-2.45658784277749	-32.3358101520028	4.64082186550285	-7.39893540266136	3.12983974143946e-12	2.04135499669712e-11	5.11992876278775
337	TIMM13	14.790297588302	8.37311599513828	9.61288228760731	2.1238499180706e-18	3.01449665790666e-17	26.7650181735807	19.9528111600485	8.37311599513828	12.7144922805096	6.34143606543333e-28	2.59092959244848e-26	43.8717761441174	-3.57628279191755	8.37311599513828	-1.89806005144614	0.0590413670737635	0.113632779159464	-3.97173743658343	19.356708006846	8.37311599513828	10.3000046617356	1.90830232345986e-20	1.61710952447265e-18	28.0405710520805	-4.29140712813512	8.37311599513828	-2.07683153946137	0.0390175470890776	0.0711331854500474	-3.68239158102541	-5.51849827527326	8.37311599513828	-2.56113809124351	0.0111248756167799	0.0303309287549958	-2.84916260900474	-8.63063485399014	8.37311599513828	-3.83983033550739	0.00016239514733508	0.00072969382777428	0.016653785201548	-6.50200233559192	8.37311599513828	-3.19579358295451	0.00160647898155408	0.00316264318516239	-1.45829012957722
338	SDHD	19.0512244583346	6.61699333417074	10.2163124405941	3.40762581359655e-20	5.98820880300223e-19	26.7548029744207	19.0107703970932	6.61699333417074	9.71854266492171	1.03677918828987e-18	1.26717456346539e-17	23.6443684102654	-8.19685105993044	6.61699333417074	-3.40829296783143	0.000781731731258556	0.00277905873387131	-1.28502951208177	12.5802295213368	6.61699333417074	5.28297815315948	3.13494951371671e-07	2.1539833295447e-06	3.80542144671396	-10.397864129342	6.61699333417074	-3.97073782127062	9.80121064621969e-05	0.000358458599081692	-0.188085378316807	-1.30614213687482	6.61699333417074	-0.476008295944353	0.634556706556934	0.728628798856903	-5.02433744474885	-9.4834462481498	6.61699333417074	-3.3991060549518	0.000807053671693927	0.00300445623305516	-1.58707549737513	-7.35766810460491	6.61699333417074	-2.87510965351556	0.00444904814669424	0.00809564070771029	-2.45070206397115
339	LSR	34.9424293758475	5.30629124667928	10.7787022569127	6.73667613785376e-22	1.49355765536913e-20	26.7341154759401	34.1798438698662	5.30629124667928	10.2331068442036	3.03372009955553e-20	4.47816231469874e-19	23.7671400740009	40.4826177858341	5.30629124667928	10.9188681387143	2.5100418266654e-22	1.03290929845511e-20	24.5897608368029	30.8583766954122	5.30629124667928	7.5926870694865	9.72778452439296e-13	2.313635238234e-11	10.4503059363201	-51.670002962705	5.30629124667928	-9.27625491374022	2.04470048317431e-17	4.42180974055087e-16	11.0107853013315	1.29089011469119	5.30629124667928	0.256403386503726	0.79788703774178	0.85591755358172	-4.95658093264487	-70.5019198001898	5.30629124667928	-9.83454653756087	4.70256715216812e-19	3.32082519881502e-17	7.89160488293476	-29.1144101762235	5.30629124667928	-5.3518793642478	2.2446395371481e-07	8.1493736289985e-07	1.50421611238536
340	IGSF8	33.9228915260908	4.68500470655926	11.4990927001359	4.07401091229187e-24	1.1981152914298e-22	26.587309694787	36.0902917338612	4.68500470655926	11.9551821203607	1.54525989561873e-25	4.48674446849703e-24	27.8045630472135	7.62866734185464	4.68500470655926	2.06309511814386	0.0403171382877095	0.0824111044602027	-3.82128640277584	22.7352839413691	4.68500470655926	6.05923777063137	6.13285385927027e-09	6.19786644435087e-08	4.13622338601697	1.60174520322972	4.68500470655926	0.399258436247569	0.690103117570835	0.7617502571411	-4.92394715768703	-23.503694740633	4.68500470655926	-5.10616917712528	7.28466187202074e-07	8.91299805517832e-06	0.546715563617842	-3.06935615603649	4.68500470655926	-0.678599357389574	0.4981289279577	0.61596674778851	-4.79955326463521	19.6571920022513	4.68500470655926	5.26670159041916	3.39085929593568e-07	1.2006013725009e-06	2.12382832632349
341	CUTA	-23.1490320748766	7.87349871229243	-10.0255461920705	1.27024722999369e-19	2.12524994074166e-18	26.5806545665114	-27.8239370586938	7.87349871229243	-10.9289286531294	2.33802268306155e-22	4.56433097171061e-21	29.518984870811	-2.071574220951	7.87349871229243	-0.868130188545251	0.386300862221906	0.509016570354596	-5.08883216180202	-6.96446786452339	7.87349871229243	-2.51184512311375	0.012752659984744	0.0263673287954946	-2.96283180181167	10.6674826659664	7.87349871229243	4.13823269311858	5.04137198826293e-05	0.000198053899538901	0.980981432614898	18.0259537611479	7.87349871229243	7.08058883901501	2.05723006139522e-11	6.17708973815258e-10	11.7305271212888	5.77872776713604	7.87349871229243	2.13391615398741	0.0339937764835859	0.0729896401974893	-3.59480885653091	18.6535689825758	7.87349871229243	7.59621271545736	9.52165855030955e-13	6.53828174162913e-12	14.2614504185838
342	TOP1MT	29.9678803285113	4.74131667403497	11.5613616055273	2.61026889056005e-24	7.81714034241021e-23	26.5282981359634	32.1506043284552	4.74131667403497	12.0990125127801	5.47897349734464e-26	1.71724539204446e-24	27.978342333543	5.09925419537285	4.74131667403497	1.60654271823299	0.109637272829605	0.189035478699425	-4.28452011629518	21.9415827099653	4.74131667403497	6.8205254850227	9.24039047457681e-11	1.39643417475771e-09	6.3649425498923	-32.8462390955254	4.74131667403497	-8.53128208807836	2.71982565826833e-15	4.6789181249007e-14	8.82129922765616	-19.4527143949385	4.74131667403497	-4.88582775721593	2.02372619602834e-06	2.16570885711545e-05	0.138603072336225	-4.09035063611548	4.74131667403497	-1.14973257308819	0.251544302893104	0.367189846254576	-4.61563357263824	-50.2151597496138	4.74131667403497	-11.9139366247	2.07947001021418e-25	4.13005849250872e-24	15.2252829199352
343	F11R	39.172267476392	4.50852678901452	11.6830473062762	1.09201401991096e-24	3.52899445982524e-23	26.4932860760033	34.693667206718	4.50852678901452	10.0171715958192	1.34552390384174e-19	1.84124323683607e-18	19.4492447513881	44.0014685261478	4.50852678901452	12.0957924792528	5.60777754485087e-26	3.37647237437336e-24	25.9073245833665	43.26838961384	4.50852678901452	10.795481030063	5.98686605982711e-22	6.1151560468234e-20	19.104457073237	-52.9431826456893	4.50852678901452	-9.09300300350199	6.92013715404193e-17	1.41368516146857e-15	7.40040744564707	-25.0203508650866	4.50852678901452	-4.39889228344707	1.71929788681074e-05	0.000136683584608164	-1.24438979798893	-59.9101107187726	4.50852678901452	-8.77287793564379	5.67931995073915e-16	2.33710144735453e-14	4.53255835538352	-35.7085551526643	4.50852678901452	-6.59576599513977	3.29319872264432e-10	1.70009897956006e-09	3.06931114557562
344	RUFY3	-35.4215958934336	5.74369491294238	-11.7437843185323	7.06356759096545e-25	2.3766827423719e-23	26.486825445708	-36.1900463398824	5.74369491294238	-10.9976877919465	1.43854706711026e-22	2.88213282797572e-21	21.6587191554376	7.89071328470967	5.74369491294238	2.77006809542379	0.00609987566564622	0.0166784363324552	-2.6125329281615	-14.3679569500567	5.74369491294238	-4.07561284540845	6.47972714383078e-05	0.000247422467118519	-0.462240839619913	27.1220370593486	5.74369491294238	8.91872245101211	2.18555704256209e-16	4.23775806218818e-15	15.5903593027132	15.9997030398347	5.74369491294238	4.92276861600548	1.70902089089564e-06	1.87092813319102e-05	1.88258268326471	-6.55410480338799	5.74369491294238	-1.81653831328087	0.0706945707680891	0.132624776908321	-4.08465389178423	59.1215687261657	5.74369491294238	23.1396603198363	5.04566178025827e-60	9.31005980099267e-58	72.5096333303317
345	GRID2	71.0542401603545	3.3752686784504	12.783474969911	3.83990741288982e-28	2.16396752726402e-26	26.4686186112915	79.1405454356852	3.3752686784504	13.9490458926902	7.70895334312409e-32	5.58167254717339e-30	29.4878214983512	-38.519113649117	3.3752686784504	-4.03365089227115	7.65411494906257e-05	0.000345962366721754	-2.29078259311373	79.1742579635795	3.3752686784504	12.6991418250729	7.09004335371435e-28	1.97829502357298e-25	22.8248677412909	9.70048642095588	3.3752686784504	1.11758281518063	0.265005133224147	0.356875659103501	-4.59489870286836	-29.7341264082225	3.3752686784504	-2.78060066637098	0.0059122730485227	0.0180508149653322	-3.7109857910726	43.6158357761709	3.3752686784504	5.94998107629463	1.09062516636659e-08	1.28493840404056e-07	2.20306348731036	-16.9985481420907	3.3752686784504	-1.99983559100995	0.0467893111378004	0.0696059453077291	-4.08373609467998
346	NCL	16.2978544725911	10.1634222628326	9.25413904956659	2.37006007153017e-17	2.90294295699199e-16	26.4417390162568	11.3323793593628	10.1634222628326	6.08279440508963	5.41209017627558e-09	2.04607771370101e-08	9.50758150761253	-12.2202674556724	10.1634222628326	-6.02970183428076	7.17044907810567e-09	6.81878116820689e-08	9.04138322509056	14.3332366032191	10.1634222628326	7.0309008374842	2.74817860938708e-11	4.73300264331393e-10	13.7171277428738	-7.2652186184882	10.1634222628326	-3.23892082426025	0.00139202446244777	0.00383729153021748	-1.17392505868406	0.276548343846903	10.1634222628326	0.124695588162801	0.900882242875625	0.930865065063468	-5.57145155382042	6.40721898862338	10.1634222628326	2.95753696800354	0.00345139668553345	0.0106196821093337	-1.88138879759563	-13.1475324560781	10.1634222628326	-5.93387571311012	1.18651725102306e-08	5.08570901150384e-08	8.34554884543206
347	MSI2	-41.8120338547596	5.62444038283958	-11.986907445372	1.22958630214026e-25	4.61195649065067e-24	26.3887821833308	-44.6514176833365	5.62444038283958	-11.7418677897036	7.16139076016251e-25	1.89644236796896e-23	23.2783655514647	-1.02664644330627	5.62444038283958	-0.310171704092615	0.756733888085572	0.828741688655843	-5.09828946510974	-19.8794412132275	5.62444038283958	-4.76720775936237	3.46037698240988e-06	1.82259266476837e-05	0.803423771721451	35.3439881851783	5.62444038283958	10.8265619515103	4.81075743987242e-22	1.56349616795854e-20	23.5722140922615	5.71519921937465	5.62444038283958	1.54502689922719	0.123825316046801	0.209563045303914	-4.33970719316106	2.32773786506545	5.62444038283958	0.615183345519506	0.539090840515213	0.653374215011552	-4.93341144106904	29.7048496674091	5.62444038283958	9.33602389301964	1.3709130977029e-17	1.48094861545998e-16	18.1646404921838
348	EXOSC5	27.549438433124	5.3106148794605	10.9742501327035	1.69769655451979e-22	4.03776477831734e-21	26.3884186166316	30.3227372827886	5.3106148794605	11.8687096514386	2.87909471200382e-25	8.07275576110874e-24	29.7886328656639	-5.17271472577844	5.3106148794605	-1.60510732335334	0.109952918123505	0.18952258299426	-4.28345020310741	19.6797527302524	5.3106148794605	6.3091794582173	1.60171303692626e-09	1.84342023565758e-08	5.7560407893212	3.64399054259902	5.3106148794605	1.09084594661822	0.276574063005995	0.369266228945648	-4.68235954642948	-16.4142246434735	5.3106148794605	-4.24250838419971	3.29788487768536e-05	0.000234625640551745	-0.649860570574385	12.7054303374336	5.3106148794605	3.77160720072043	0.000210193695202373	0.000914998429648077	-1.10668482331086	-23.7309940795727	5.3106148794605	-6.53548026379962	4.61015692806926e-10	2.34400867809388e-09	5.07234146755416
349	RBM47	52.7032830618297	4.55739554284898	11.1244685775616	5.86302137843796e-23	1.47737807421432e-21	26.3847450190348	61.3895600635477	4.55739554284898	12.8009180244418	3.38226869438254e-28	1.44513774900406e-26	32.994987440226	26.3192666237034	4.55739554284898	4.38681270507595	1.8091565978817e-05	9.37352874989434e-05	0.301499144486723	52.9755682874181	4.55739554284898	9.18429572024623	3.77464929971664e-17	1.9107074331309e-15	15.1334455084945	-79.1406565348485	4.55739554284898	-7.70248176859049	4.98040183212204e-13	6.88113489848745e-12	3.10958120214796	-24.2454726551655	4.55739554284898	-2.73969735075048	0.00667144754786051	0.0198805313747133	-3.39629333449983	-74.3539140492877	4.55739554284898	-7.04591629657443	2.51822720241957e-11	4.82554760396647e-10	1.78752657988648	-38.7786703900114	4.55739554284898	-4.52461763435844	1.00548175765115e-05	2.83597418824682e-05	-0.932586057638594
350	TRNP1	51.6816714257885	3.67830059195893	12.2952377126199	1.32705091857507e-26	5.86156853609994e-25	26.3673484590229	55.1385113381531	3.67830059195893	12.9659215734879	1.0172849579891e-28	4.6550959677581e-27	28.3304494882166	-31.8072249318848	3.67830059195893	-4.53672197460441	9.54301836778715e-06	5.23607338740935e-05	-1.34067901253057	40.1516001891158	3.67830059195893	7.45144077478661	2.28404907302637e-12	4.96758961890145e-11	6.52664525057884	-22.4252229544948	3.67830059195893	-3.38394863721522	0.000850514156154779	0.00246638325637786	-2.69358692633859	-15.3250572364434	3.67830059195893	-2.28461953469843	0.0233209437971695	0.0553854259995057	-3.85029813333055	-7.96960307614299	3.67830059195893	-1.18429305045284	0.237617934680964	0.35138950009698	-4.56807391178994	-9.19956488485923	3.67830059195893	-1.40539271187983	0.161362520093757	0.211090592323908	-4.45727829769896
351	IMP4	21.5649419527145	5.88368226346631	10.5871121515489	2.58227666341105e-21	5.29412993358824e-20	26.3460563799143	22.8906784081322	5.88368226346631	10.9667166369927	1.79049752119311e-22	3.54382208346872e-21	27.5961806932882	-6.04463299178231	5.88368226346631	-2.34815412764876	0.0197838165467468	0.0450043470460893	-3.35968259044501	15.3116902247258	5.88368226346631	5.94989889217271	1.09109468777923e-08	1.03758297823728e-07	5.17696410818408	-6.99179753765976	5.88368226346631	-2.46329415457832	0.0145601336069428	0.0304400454063279	-3.26519412826856	-14.8218675186307	5.88368226346631	-4.82306383795091	2.69118150249093e-06	2.77611509364259e-05	1.04633801775506	-8.25695383706315	5.88368226346631	-2.69291712561033	0.00764709787408017	0.0208490942992081	-3.01559527835832	-13.3869585136387	5.88368226346631	-4.80811687196545	2.879060180101e-06	8.84674951930042e-06	1.48709650894057
352	PLEKHO1	-47.4283215822467	6.16921900690564	-11.8118935484012	4.33133938906007e-25	1.50153098820749e-23	26.2588545174866	-47.5984766304198	6.16921900690564	-11.2771972886725	1.98185197601917e-23	4.41097015674305e-22	23.0733992653175	6.76831484428758	6.16921900690564	2.02955758712361	0.0436462584489041	0.0880933656766872	-3.75934801695761	-23.0824902704881	6.16921900690564	-4.9992936745014	1.20063549626307e-06	7.10567515636293e-06	1.64902512924177	32.9736918828229	6.16921900690564	9.2860476948702	1.91519836895646e-17	4.17376702128492e-16	18.77521235748	17.4052096511976	6.16921900690564	4.69500004427375	4.77396051218894e-06	4.57920155694928e-05	1.86691771389732	31.6141729215487	6.16921900690564	9.0107880853734	1.19188736916824e-16	5.61118991904717e-15	17.821981548976	32.9066691285002	6.16921900690564	9.89135731430171	3.18900640937939e-19	4.0090366289341e-18	22.3994224718807
353	CTXN1	-41.3109843300296	5.92993145976041	-11.6615185084694	1.27422284604579e-24	4.04919704410107e-23	26.1703727097738	-51.9896886213861	5.92993145976041	-12.8235831572691	2.86802317298433e-28	1.26193019611311e-26	26.5783293701852	6.12303492958481	5.92993145976041	1.95838123638189	0.0514917507338903	0.101144510370142	-3.86281812617047	-18.006702676681	5.92993145976041	-4.35919425613716	2.03184488822781e-05	8.74310639231064e-05	0.164505304051985	6.27967709027266	5.92993145976041	1.68950558192135	0.0925868367930303	0.148346416374267	-4.19719601295604	33.8170962816512	5.92993145976041	10.6597434780055	1.55285201685489e-21	1.4211701658256e-19	24.6200144412735	19.2963221798902	5.92993145976041	5.68928438832301	4.18666684261024e-08	4.42656826982081e-07	4.75604180344101	36.1133322847162	5.92993145976041	11.6662229608931	1.23197821424148e-24	2.34506335622672e-23	29.4206209349025
354	CBR1	32.9716780163716	5.52887409394105	10.6329402952949	1.87365579173815e-21	3.90430277914107e-20	26.1378150911525	36.6210226873035	5.52887409394105	11.5222949888422	3.45150525537986e-24	8.49144518742915e-23	29.5897233770794	-35.0106905950188	5.52887409394105	-7.6771582204474	5.8146402752339e-13	9.51637836175619e-12	8.8351414832596	19.1542655601103	5.52887409394105	4.72830838047037	4.11724626050407e-06	2.11977035194269e-05	1.38901973344498	-2.07562469499763	5.52887409394105	-0.476978450863264	0.63386684272903	0.713864607286878	-4.96570276718317	-2.81496644689417	5.52887409394105	-0.590052106116432	0.555781634387543	0.660243187683644	-4.88683938409631	6.09418530989261	5.52887409394105	1.36936913858451	0.172327091247871	0.27244636869481	-4.48395922501276	-7.67837624126795	5.52887409394105	-1.81388282289751	0.0711040416712625	0.101513819633002	-4.07369918643124
355	LIN28A	32.459159438363	6.77872764943021	9.8946192027388	3.11860217237531e-19	4.91416099889443e-18	26.0992886856827	30.8389584599231	6.77872764943021	9.13019349349516	5.40765822314969e-17	5.35152336270177e-16	21.9235826597001	6.33403917475491	6.77872764943021	1.48502286279075	0.139017343577482	0.229422736659895	-4.43702892446283	37.0955156099203	6.77872764943021	9.43285363473868	7.15811823283001e-18	4.09444362917877e-16	21.3721142901732	-1.07649099498714	6.77872764943021	-0.224204840870425	0.822812995073455	0.869398786703641	-5.12706838222094	-21.0178307646822	6.77872764943021	-3.58821335724741	0.000413169180349295	0.00198265747617279	-1.4677622630204	3.48192542844711	6.77872764943021	0.657033774869809	0.511869037215311	0.628977635418169	-4.94583541728315	-11.7858598464331	6.77872764943021	-2.39614849298855	0.0174336229174692	0.0284103484580979	-3.27096253739173
356	APELA	83.9242803658943	3.08316373190314	13.1436830880839	2.78323079510184e-29	1.90025816001509e-27	26.0739063112078	64.9719862288667	3.08316373190314	9.72069111649659	1.02174059575057e-18	1.25280947646157e-17	14.4460750577611	81.7793323292044	3.08316373190314	11.648189493112	1.40192448065353e-24	7.00350046230409e-23	19.0160220337727	77.2553257039672	3.08316373190314	10.7664656343203	7.34184327292432e-22	7.43280416303135e-20	16.021381514564	-93.1554201467482	3.08316373190314	-6.80283977552618	1.02217977761067e-10	1.06403427259927e-09	-0.455223075482706	-76.0148753080418	3.08316373190314	-5.18743247116531	4.95692539558847e-07	6.42939076253198e-06	-2.31900750862743	-9.32490287023887	3.08316373190314	-0.858220839288148	0.39173596806854	0.517310339917361	-4.66557039181096	-55.1538463100274	3.08316373190314	-4.01515098570237	8.23390121868059e-05	0.00020110125948272	-3.06553286972403
357	BCL7C	-39.7859262520606	5.80440933407942	-11.8719473463728	2.8128316781175e-25	1.00245465413284e-23	26.0577992385721	-42.9991374788126	5.80440933407942	-12.2214378115303	2.26299301618745e-26	7.3547273026092e-25	26.0098328706524	31.5748708669893	5.80440933407942	11.4294765352946	6.69729848806535e-24	3.08939897997853e-22	28.9095000962205	-18.6854560841613	5.80440933407942	-4.86831440242351	2.19185272043117e-06	1.2160424404332e-05	1.26671285083567	-15.5252685912613	5.80440933407942	-4.04537654119895	7.30699050865709e-05	0.000276337095600123	-0.576947962533924	22.5652952834165	5.80440933407942	7.16222021841138	1.27513085220211e-11	3.9639937361935e-10	9.59062727755388	16.3184193372722	5.80440933407942	4.94988601500612	1.50871563877047e-06	1.1258778152338e-05	2.22405786993213	-3.06494564737772	5.80440933407942	-0.869994828711687	0.385283345996696	0.452995013175972	-4.83550147630559
358	CST3	-61.1511863266131	7.27690940532025	-10.9155510796138	2.56947870243129e-22	5.98672838203949e-21	26.0152002613271	-73.4385955837241	7.27690940532025	-11.0535288486697	9.69112743117334e-23	1.9975945551824e-21	22.8291220060782	58.6742407797089	7.27690940532025	15.3821452277037	2.12866482741899e-36	3.04399070320916e-34	56.703378563128	-23.1402852991547	7.27690940532025	-3.77223106956141	0.000209701753700353	0.000704548623298691	-0.582139572194829	15.4542652530723	7.27690940532025	3.08114714836515	0.0023343156744799	0.00607889171774415	-1.80987354248501	23.4033126119053	7.27690940532025	5.04265523164149	9.81223005169571e-07	1.15604440567867e-05	3.91404636947795	10.9004214150483	7.27690940532025	2.16775489852648	0.0312869144976885	0.0681237727167028	-3.54241686650443	14.479214579606	7.27690940532025	2.91655479710113	0.00391850229373518	0.0072035459168135	-2.15415834208019
359	PPRC1	34.7713120735616	4.09153364583858	12.0497290607968	7.81812165627067e-26	3.04215346080736e-24	25.9156030485761	37.9408234487127	4.09153364583858	12.9753945159747	9.49435703674992e-29	4.36206604419354e-27	28.7700128615777	-8.15039135841362	4.09153364583858	-2.13615925891866	0.0338083002842795	0.0709403806405277	-3.8350707916125	24.0197424765789	4.09153364583858	6.70861402897396	1.74548734345528e-10	2.50230265778552e-09	5.11592202016891	-14.1279241938607	4.09153364583858	-3.4049086426088	0.000790972300571218	0.00231721462702554	-2.41897215700159	-34.7254537609824	4.09153364583858	-7.02505353851409	2.84322065233992e-11	8.36155379505623e-10	2.63984878240421	9.54800970335955	4.09153364583858	2.3542651078533	0.0194698595080821	0.0457080223214569	-3.66048628166799	-53.9648259328904	4.09153364583858	-10.4567736767332	6.41569189998797e-21	9.14016380272259e-20	8.23907739739587
360	PARP1	16.1652394108528	8.87938839230208	9.33082959600383	1.4194373169523e-17	1.80226003395497e-16	25.839150180923	13.7225385143489	8.87938839230208	7.64975756072427	6.87328609717781e-13	4.14717262403555e-12	16.6283866516957	-20.98835367039	8.87938839230208	-9.63791387115354	1.7924888625453e-18	5.3262526201346e-17	25.2242246971066	17.5972277358954	8.87938839230208	8.17800506365951	2.58866668666875e-14	8.32553019020345e-13	18.0106855527915	10.1172664860212	8.87938839230208	4.6465081754384	5.91355875806717e-06	2.81879634134535e-05	2.95125731894111	4.14585855248184	8.87938839230208	1.80879863400284	0.0718934759414461	0.13653077104418	-4.10188037369669	11.1921155530641	8.87938839230208	5.03140844503291	1.03407596856998e-06	8.00394389745638e-06	4.24661965447054	-8.60311296470451	8.87938839230208	-3.78009436316932	0.000203593908497814	0.000465636607999798	0.156290557178259
361	KLKB1	97.4385312009166	1.74837916146347	15.8729618803596	5.89807547623617e-38	1.34947966896283e-35	25.811418986769	89.7468893054565	1.74837916146347	14.2292486088158	9.89685093709196e-33	8.2642317314111e-31	21.4024239967654	18.9025144095564	1.74837916146347	2.05372623853113	0.0412245740086015	0.0839759840915956	-4.1826073980018	76.5904888409935	1.74837916146347	10.3419667250918	1.42610177029454e-20	1.21750778001265e-18	9.2894603300716	-44.6712730904575	1.74837916146347	-3.24921041494489	0.00134494647370381	0.00372186445553255	-3.93606719086359	-59.1247079936228	1.74837916146347	-4.14414622644763	4.92254069969403e-05	0.000331258032967646	-3.57306737459954	-49.5224129658165	1.74837916146347	-3.53477405850033	0.000500641637709631	0.00197426416249506	-3.83264109281981	-60.9689610932894	1.74837916146347	-4.3539227445483	2.07723630762512e-05	5.60197627516063e-05	-3.4312089539973
362	AFG3L2	22.9038750204187	5.90289689970058	10.4192918869861	8.32971616255938e-21	1.58819921499466e-19	25.7986488390634	22.18264714636	5.90289689970058	9.70976810207958	1.10051841254104e-18	1.33935432334782e-17	21.9578234917503	-18.0254177980958	5.90289689970058	-6.16287751229084	3.52975756333976e-09	3.51439743469164e-08	5.54355634146812	20.206535774377	5.90289689970058	7.22719388303378	8.69433458887901e-12	1.63860276271460e-10	9.43897525738296	-10.1449970935041	5.90289689970058	-3.20094835213392	0.00157932360510657	0.00429461897846903	-2.11669783375929	-3.3366955482372	5.90289689970058	-1.0681983830463	0.286641087650975	0.4018595640597	-4.70636254473488	-0.0766316266802249	5.90289689970058	-0.0247331040085282	0.980291023256363	0.98693384722809	-5.05001272148206	-2.69289618618513	5.90289689970058	-0.928021473673418	0.354447649463001	0.421812244861826	-4.81917653304939
363	PRSS8	58.9405065009751	3.86771562353331	11.7342655559039	7.56291841480058e-25	2.50057186893985e-23	25.7755701239491	56.9360367669527	3.86771562353331	10.999298361753	1.42226123176933e-22	2.85450324411247e-21	22.356596547867	87.2182276932408	3.86771562353331	16.5786763777631	3.46314595352616e-40	6.60306495138987e-38	40.6080899623715	52.126025433297	3.86771562353331	8.64587027529063	1.29712083944108e-15	5.11691807007101e-14	11.5266304857187	-100.602374360349	3.86771562353331	-8.62174378135531	1.51652115580649e-15	2.66907723421943e-14	2.31761755759052	-46.1781298301036	3.86771562353331	-4.48221002650273	1.20644177510766e-05	0.000100742291293662	-2.00743693196929	-99.6084734106936	3.86771562353331	-7.84628468904695	2.05641246137854e-13	5.62807621008865e-12	0.611109857326076	-55.6303427994271	3.86771562353331	-5.25694716170508	3.5538370699332e-07	1.25481160740851e-06	-1.20545289333118
364	C12orf57	-25.5179689536781	7.83368520922272	-9.93907676688988	2.29988483965404e-19	3.70572993882285e-18	25.6903160610001	-34.9041307569177	7.83368520922272	-12.4127195167097	5.66821843227672e-27	1.95904588716754e-25	36.0828070631843	-1.05397398860108	7.83368520922272	-0.417648307606815	0.676625287013881	0.766016158677763	-5.33285222058507	-1.22058937018294	7.83368520922272	-0.407142651651926	0.684312386757148	0.75375830006757	-5.2084153441439	12.1570154414871	7.83368520922272	4.53355142469447	9.67460001155562e-06	4.40244328290359e-05	2.26599563347919	14.6394661998362	7.83368520922272	5.35398447119218	2.22173926464958e-07	3.11479132200872e-06	4.97059983128879	14.9107037014084	7.83368520922272	5.51571198450278	1.00205707448597e-07	9.78952428020447e-07	5.60271733437581	18.4364616530496	7.83368520922272	7.07347205777538	2.14450673276929e-11	1.26720852390912e-10	12.0638493257607
365	SPSB2	39.8413153485806	4.22239938261312	11.5763067807205	2.34557304811457e-24	7.10893198889703e-23	25.6836993047055	42.741866671927	4.22239938261312	12.219907132898	2.28817110568731e-26	7.3990072825904e-25	27.6738637542401	2.67129137995583	4.22239938261312	0.580627362198671	0.562105890214309	0.671591789457097	-4.86317539311505	28.3827230007377	4.22239938261312	6.34817511782054	1.29492980106319e-09	1.5116323392003e-08	4.30350930983538	-38.1247800974525	4.22239938261312	-6.46209143202176	6.92524894665813e-10	6.3304455778282e-09	2.13559913270725	2.64368445706156	4.22239938261312	0.506556931003116	0.612990082089774	0.709919595244999	-4.83175740929696	-15.772954131581	4.22239938261312	-2.77820636031379	0.00595445370509443	0.0168945809489783	-3.33346492824288	-36.8247623836178	4.22239938261312	-6.29018562365803	1.77594123704377e-09	8.40230262687375e-09	1.87952150140634
366	USP32	33.7150364751618	4.21440353453788	11.7391174153806	7.30414107496018e-25	2.44136433505383e-23	25.6716433497143	41.4408944553837	4.21440353453788	14.5760035329531	7.79678042360928e-34	7.62351863641796e-32	36.1640037861884	-2.08143947910484	4.21440353453788	-0.550227357037439	0.582740424405297	0.689619370559284	-4.86757827700545	38.3062854842934	4.21440353453788	11.088578936122	7.56107201323505e-23	9.10512250856937e-21	18.9265396408856	-2.0179538059738	4.21440353453788	-0.496391076869425	0.620130783487443	0.70171079753673	-4.85135414588133	-19.2893703779734	4.21440353453788	-3.80910749220468	0.000182482691750291	0.00100303913734321	-2.33211717902883	-18.8114109628174	4.21440353453788	-4.03548246246976	7.59887748557184e-05	0.000374219364765139	-1.77270206100667	-11.3744732813976	4.21440353453788	-2.77575200105804	0.00599797560254323	0.0106763405777337	-3.16454170341309
367	DYNLT1	-23.0503661418742	7.6467040336576	-9.92522711449144	2.52888257971289e-19	4.04056099328429e-18	25.6107449888594	-24.9176317888028	7.6467040336576	-10.1488894746267	5.43029020071831e-20	7.71708321692142e-19	25.8883629922626	3.72655900544779	7.6467040336576	1.58477536326229	0.114502048216594	0.19591735441188	-4.38737104449739	-3.69119548471977	7.6467040336576	-1.33862851054252	0.182119748508234	0.257374913271674	-4.59998919469571	24.8850093473657	7.6467040336576	10.0614575948302	9.92181448603373e-20	2.71544396459871e-18	25.3557038414204	15.4466145595478	7.6467040336576	6.10149964104679	4.89949561729722e-09	9.43606563331317e-08	7.62409387873638	-0.420363055746097	7.6467040336576	-0.153361739546337	0.878258319521789	0.919341386773019	-5.25288575227073	28.434839198799	7.6467040336576	12.0583304637936	7.34788684805196e-26	1.50644848641065e-24	35.9893250511771
368	NOL11	20.6047658134839	6.05160582896149	10.3290079458098	1.56038822073445e-20	2.8334668643178e-19	25.6048288665209	12.3457979526122	6.05160582896149	5.81587796737609	2.1897238574915e-08	7.65366358988779e-08	5.99440427204797	-13.9094487216842	6.05160582896149	-5.46096623045224	1.31447255415617e-07	1.02018765397195e-06	3.78005098137901	4.30433234021541	6.05160582896149	1.62786699182383	0.105032481488395	0.161631905868608	-4.26076106255711	2.52895445138381	6.05160582896149	0.962988455480321	0.33664612885935	0.433209416664901	-4.80488306997513	-1.4402056280005	6.05160582896149	-0.498631307154475	0.618554066810337	0.714462247194042	-4.96811936403174	4.97257998174212	6.05160582896149	1.73003900049603	0.0850729194604304	0.153938676887473	-4.16168489483158	1.78570097375462	6.05160582896149	0.69819566384646	0.485816950197689	0.550926438368513	-4.95875781135647
369	MRPS35	17.697863283695	6.15124699755582	10.2820149811284	2.1618626311865e-20	3.88863341207131e-19	25.534282450088	19.8973977980653	6.15124699755582	11.3211139643862	1.44989890822409e-23	3.30415209364216e-22	29.9572424485377	-11.0379433407774	6.15124699755582	-5.13920516140707	6.23256020417675e-07	4.3291128558459e-06	3.00083995794019	12.2954200615151	6.15124699755582	5.59491453758524	6.74439526882229e-08	5.32109530174669e-07	4.23635040953504	-2.29972523145549	6.15124699755582	-0.991443612360517	0.322594810167693	0.418564662392923	-4.78130837966824	-7.01052419558264	6.15124699755582	-2.85833502835706	0.0046818272822165	0.0148597660558102	-2.64770318377109	-6.28299937471352	6.15124699755582	-2.49247986922783	0.0134481403398377	0.0336130053501732	-3.23774666273029	6.2184961225976	6.15124699755582	2.86895984276396	0.00453313334873486	0.00823551619970252	-2.47412424746581
370	TFB2M	28.3797158508211	4.59144402178542	11.4464878121146	5.93164519004295e-24	1.67965398450721e-22	25.5132982312459	31.4013615609339	4.59144402178542	12.289039908895	1.38791406154284e-26	4.65622781936953e-25	27.9129492186807	-4.40622486284649	4.59144402178542	-1.40553445874371	0.161320449504143	0.257428643092118	-4.45125883361384	10.2837413179896	4.59144402178542	3.13861456345834	0.00193813703184981	0.00503572283542171	-2.47524003772306	-13.6320442281947	4.59144402178542	-3.96623763430654	9.97496908346249e-05	0.000363766803681259	-1.22570650610761	-11.9291158456813	4.59144402178542	-3.28757585782608	0.00118214585186783	0.00477028167385115	-2.46174299248907	-6.23986750684415	4.59144402178542	-1.72146869961149	0.0866188161194767	0.156173247660648	-4.22067082137179	-29.9349819281285	4.59144402178542	-8.05932738280107	5.46062884158056e-14	4.2536819444447e-13	7.18390343369424
371	ASXL1	-35.4131716613421	5.09473465158928	-12.2743302817541	1.5437521306619e-26	6.76648443477858e-25	25.4462141289359	-38.3999078034334	5.09473465158928	-12.3883223621193	6.76411800622434e-27	2.323769068805e-25	23.8045518231261	13.5315690067022	5.09473465158928	5.08908510128174	7.89439294816594e-07	5.35339984155414e-06	2.55750724890078	-32.1004980241076	5.09473465158928	-8.76066802926625	6.15007363919429e-16	2.56776797198477e-14	9.64391047364479	3.23435257092945	5.09473465158928	1.01140224390574	0.312972356882405	0.408069724496776	-4.71181028672848	8.46348754484472	5.09473465158928	2.67124733454206	0.00814126228955183	0.0234363463997164	-3.06222472659888	33.8294187106729	5.09473465158928	12.5787237791309	1.70037955927129e-27	3.18890855050222e-25	28.4788862658145	-6.035959030708	5.09473465158928	-1.8782365249862	0.0617161055358401	0.0892920510092337	-4.03383608821563
372	CBR3	102.432563865373	2.0182402121587	14.4586421887013	1.84262148475781e-33	2.15097854955401e-31	25.4399058188113	116.479289481069	2.0182402121587	16.322907274192	2.22249716442819e-39	5.29695157522052e-37	29.5178056116195	-72.1850622279827	2.0182402121587	-3.92975823171631	0.000114956202022975	0.000499847567899214	-3.7262584957619	78.1305917658975	2.0182402121587	8.77263762294483	5.68823089553743e-16	2.40123104962909e-14	6.74743274253184	-42.5523515954378	2.0182402121587	-3.04831019419435	0.00259297060887229	0.00667647620200292	-3.79179856332652	-42.4224674175896	2.0182402121587	-2.57477087603355	0.0107087844082009	0.0293714921193522	-4.17595783385972	-28.6485031328696	2.0182402121587	-1.8940129202009	0.0595794210414837	0.115494166674791	-4.37555423854269	-70.9488340791961	2.0182402121587	-4.25066331137275	3.18915035305943e-05	8.32585121839341e-05	-3.39649919753581
373	ADD2	34.7909795068408	4.46021909168458	11.3918066761598	8.76173486995445e-24	2.43287007068638e-22	25.4116098595388	46.7181105535111	4.46021909168458	15.4059716961706	1.78822653515833e-36	2.69175152134358e-34	40.5186532955475	-52.6108870750014	4.46021909168458	-10.7696005730728	7.181828022009e-22	2.84291046961187e-20	12.5803358484916	45.4408129904466	4.46021909168458	12.8831255355715	1.85930016715784e-28	5.74875511142855e-26	26.8377064372435	17.1440835743787	4.46021909168458	4.28135327786496	2.80989029340812e-05	0.000116299366702565	-0.414405370696783	-18.7218450531329	4.46021909168458	-3.60873698458885	0.000383567623187344	0.00186803474212994	-2.36737463933498	-6.73058686596575	4.46021909168458	-1.44697213813635	0.149375920642186	0.243288800134768	-4.4241611889449	33.1655638598662	4.46021909168458	9.16366410786745	4.32974029533e-17	4.43837177227376e-16	13.9899299217977
374	ZNF296	81.1568005407739	2.26778676243808	14.2664972458072	7.53282845165162e-33	7.76356373755807e-31	25.3896163786784	81.452621712541	2.26778676243808	14.0756097569946	3.05051555308011e-32	2.32652652848243e-30	24.3350027142968	-17.6825387964439	2.26778676243808	-1.82571367621306	0.0692947138555162	0.129700838760979	-4.31557472471778	56.6042159166851	2.26778676243808	7.8811760135843	1.65707164410296e-13	4.52431971564149e-12	5.03390384386087	-49.2981175896454	2.26778676243808	-4.19179241402048	4.05800760568356e-05	0.000162718566452926	-3.11756123683183	-53.6302408083789	2.26778676243808	-4.36117837737726	2.01500782305304e-05	0.000157456895462615	-3.1087182141119	-38.9918897202966	2.26778676243808	-3.51096726749322	0.000544966102516761	0.00212343740217703	-3.46926755350905	-30.5051753461588	2.26778676243808	-2.91943765163157	0.00388384311225678	0.00714327414858803	-3.76621194193541
375	MKRN1	19.7373054932329	6.25580726075125	10.1371693510472	5.88784432582135e-20	1.00833741148797e-18	25.3573068496971	13.5505229264182	6.25580726075125	6.6029729815507	3.1629817182848e-10	1.38056126887364e-09	9.23414999237525	-10.5374674702503	6.25580726075125	-4.2760858538253	2.8717587998237e-05	0.000142590801519024	0.684886495495677	16.1201319415038	6.25580726075125	6.43567798465808	8.01182768070498e-10	9.78178320888634e-09	7.10408643745216	-1.95256340137071	6.25580726075125	-0.734129794256025	0.463677608874267	0.559720570383203	-4.92965066075089	-0.0740869338665213	6.25580726075125	-0.0256897319186574	0.979528884059388	0.985646093204274	-5.05159915145648	-15.559196206269	6.25580726075125	-5.22103809967774	4.22201689707693e-07	3.54104642980645e-06	2.28922361053684	20.7601136721342	6.25580726075125	8.70981518527725	8.56420156812326e-16	7.81919121622746e-15	16.0791328857971
376	PWP1	18.3031969525573	6.19710355680356	10.2059203228103	3.66161322497131e-20	6.39524508300333e-19	25.3476183795044	21.3970761465794	6.19710355680356	11.6115318350343	1.8228482546187e-24	4.63408534063065e-23	31.3752709284542	-14.127437535613	6.19710355680356	-6.24423143486972	2.27806152840583e-09	2.32480141703503e-08	6.45511886101366	13.7634579982855	6.19710355680356	5.94451943402956	1.12226183395483e-08	1.06455674886144e-07	5.31632909820159	-0.496595420879861	6.19710355680356	-0.204555555563687	0.838114859735848	0.880929253526103	-5.08120957108674	-10.4229008492657	6.19710355680356	-4.01767787238936	8.15231353190442e-05	0.000503577034584161	-0.430763755329498	-4.45641821481826	6.19710355680356	-1.70599581245905	0.0894675943355772	0.160550475168471	-4.18498461779793	4.8144138543995	6.19710355680356	2.12218294618164	0.0349783025576513	0.0534319376765298	-3.66019094128092
377	RRAS2	32.0070117411135	5.86467039356293	10.2774214496969	2.23181381345836e-20	4.00187304482188e-19	25.3200315191818	34.8723634935329	5.86467039356293	10.8506147038495	4.06120434470482e-22	7.64983394779414e-21	27.3721145734669	-14.9945721014391	5.86467039356293	-3.53971187851967	0.000491882458578222	0.00185285983738389	-1.33187366264225	29.8349102702501	5.86467039356293	7.84455988072748	2.0784517933385e-13	5.59470318018644e-12	12.2247350350536	-23.5096552975966	5.86467039356293	-5.07326999783931	8.50276501781297e-07	4.69457682450678e-06	1.83685007755292	-1.16884190655499	5.86467039356293	-0.250635999015898	0.802337329745104	0.859322312338431	-5.00258052642187	-28.0609103009656	5.86467039356293	-5.07321093102409	8.50512025203268e-07	6.68259448373996e-06	0.85540709828472	-2.66310008973443	5.86467039356293	-0.616329349376835	0.538335800259004	0.602262557143135	-4.94955841948729
378	HK1	28.5399330234533	5.62492967943958	10.4212776152762	8.21535383105863e-21	1.56900914569801e-19	25.292755882977	27.4537028183761	5.62492967943958	9.75559801835511	8.05691589799834e-19	1.00843673821774e-17	21.8750310727636	-46.141327472207	5.62492967943958	-10.9641655076997	1.82305574423924e-22	7.61159040660471e-21	18.243545644343	22.7232021821175	5.62492967943958	6.51771324274667	5.08877372685068e-10	6.57803067064088e-09	6.78403955513962	4.25190337962124	5.62492967943958	1.11453292107181	0.266307581935952	0.358292218904774	-4.6737838571075	-7.72412942187965	5.62492967943958	-1.7650269021124	0.0789933612005939	0.146969205785636	-4.15625340556589	-10.7244722857558	5.62492967943958	-2.48367227753906	0.0137754748288125	0.0343037509885971	-3.36807398021369	16.8483770999535	5.62492967943958	4.85538793384818	2.3245297256646e-06	7.25583084900492e-06	1.88683932295954
379	SYT6	58.9672817729053	3.30108650409373	12.5499617959314	2.09514204701001e-27	1.0652633341242e-25	25.2545837560172	62.5814887815086	3.30108650409373	13.0244011936092	6.64274912355348e-29	3.14020867658892e-27	26.0825887422912	-36.7478107716357	3.30108650409373	-5.00329983365264	1.17851943381679e-06	7.76628013989864e-06	-0.677221433728876	61.6379609916929	3.30108650409373	11.5397540575139	3.04648818873302e-24	4.70970606474402e-22	18.740402437321	-79.7057360878008	3.30108650409373	-8.88025232441204	2.81351300980488e-16	5.39138841409845e-15	3.48933714047726	-46.640453971823	3.30108650409373	-5.14580408635208	6.04084106272982e-07	7.61931882664048e-06	-1.50225468679342	-57.4446208872285	3.30108650409373	-5.80336389869308	2.33561299631981e-08	2.58909037576537e-07	-1.20686288333983	20.1232076799554	3.30108650409373	3.18087916441346	0.00168750520319582	0.00330339827593432	-2.759528501964
380	TSR1	20.9624261982947	5.9200076230804	10.3393941562369	1.45181174427395e-20	2.66165486450224e-19	25.2290490173203	17.0151676814172	5.9200076230804	7.97773695905425	9.09325567825108e-14	6.10844656248927e-13	14.2121473719625	-8.20278355648606	5.9200076230804	-3.27986585783748	0.00121331206651872	0.00407883927151752	-1.7059856299099	16.6452099866399	5.9200076230804	6.54491700030867	4.37423021452577e-10	5.71899356047713e-09	7.14756650204596	-10.957998474731	5.9200076230804	-3.89889771099456	0.000129515423782194	0.000460284699617365	-0.689654875425689	-12.327414267078	5.9200076230804	-4.11474753335505	5.54088954797542e-05	0.000365769050368372	-0.437204032662931	1.43594514892694	5.9200076230804	0.50913556351608	0.611184628762612	0.716535371289637	-4.97320623877968	-7.84426572718706	5.9200076230804	-2.94623628931923	0.00357482173817962	0.00662950587006966	-2.4327061465271
381	CDH3	62.1188943596481	3.36470015754178	12.3113254520059	1.18121479313827e-26	5.27855360683663e-25	25.2175410128148	65.276716339663	3.36470015754178	12.7419579149715	5.19350614837699e-28	2.16049855772483e-26	26.1912181674506	20.2698512038824	3.36470015754178	3.24258957585644	0.00137506599996676	0.00456228394420525	-2.45068384686527	61.3505827954243	3.36470015754178	10.2703052848931	2.34465471879829e-20	1.94368478138061e-18	14.8133184653373	-54.4772906024129	3.36470015754178	-5.22047295822379	4.23345181483812e-07	2.46341244973286e-06	-1.61579792665565	-71.1557573480078	3.36470015754178	-6.72129167135727	1.6246680989872e-10	4.27269035687667e-09	0.0164640214043539	-15.8154271609058	3.36470015754178	-1.73190436483315	0.0847394431104444	0.153461964410873	-4.32091007339932	-57.8078880745411	3.36470015754178	-5.10502626476973	7.32398468146865e-07	2.45419990497954e-06	-2.07535910204953
382	RNF125	61.312126700688	2.84837507666882	13.5607367158474	1.32230991564618e-30	1.08828959963974e-28	25.2011855056328	67.6436674622253	2.84837507666882	14.900401073352	7.23883852646282e-35	8.5373518291479e-33	28.6494743978978	25.2383791692167	2.84837507666882	4.2954292035349	2.65076024580898e-05	0.000132770127898664	-1.37645680098795	52.8473982063327	2.84837507666882	9.70453293523527	1.14038773096829e-18	7.49772163349269e-17	10.5373039985928	-44.3063495040288	2.84837507666882	-5.22942475649599	4.05580973867374e-07	2.36485542356919e-06	-1.72936816675098	-43.0058601562133	2.84837507666882	-4.94594820967327	1.53632334489955e-06	1.70636301608261e-05	-2.11765951477614	-32.7753623003272	2.84837507666882	-3.83097863125005	0.000167956830986357	0.000751731669203411	-3.0649633467629	-75.0395670400686	2.84837507666882	-7.25954568841865	7.17964263040781e-12	4.50445446326431e-11	-0.853138549389143
383	TSTD1	22.8841295582027	7.36781824643163	9.5754652410968	2.73594514604034e-18	3.86887669600761e-17	25.1243157322278	23.6623784313231	7.36781824643163	9.59899905768399	2.33319451685019e-18	2.743242062977e-17	24.8818515397481	0.534298273974576	7.36781824643163	0.185328952833425	0.853147520729948	0.898546090696981	-5.30815464187698	24.9666817756858	7.36781824643163	8.27807731583038	1.37377130160448e-14	4.60878114086664e-13	16.2615414525983	-26.9494334805381	7.36781824643163	-7.65890792127691	6.50012191744576e-13	8.8525469923309e-12	12.0103155638831	0.0997582735234683	7.36781824643163	0.0298025701345516	0.976252435899425	0.983543018197374	-5.21086780251755	-29.3744406489673	7.36781824643163	-7.64119128495418	7.24178708487957e-13	1.82883099891881e-11	10.9472675501599	-1.82751074215948	7.36781824643163	-0.563694666849426	0.57355538486539	0.634940352512102	-5.11899504608505
384	C5orf24	-39.5035133595302	5.3549956049888	-12.3684921401945	7.80889308209764e-27	3.55911302227877e-25	25.110303044498	-46.1000531455661	5.3549956049888	-14.1806109846679	1.41342456480752e-32	1.13073965184601e-30	30.2826199664256	11.5254997350258	5.3549956049888	4.22270172746643	3.57694213332156e-05	0.000175022318242937	0.472385148881493	-25.4801242979821	5.3549956049888	-6.88306659610508	6.45837898991799e-11	1.0247414097734e-09	5.56300809063887	21.1439662601409	5.3549956049888	6.89335310372139	6.08772639397312e-11	6.50266946284337e-10	7.49204515781373	9.34954694506952	5.3549956049888	2.87857650989419	0.0044022762311413	0.0140833445425773	-2.68119974793141	18.4494199264324	5.3549956049888	6.19257258179	3.00964079183136e-09	3.91253302938076e-08	5.56635596324287	11.2735605885363	5.3549956049888	3.69814809214833	0.000276399061194279	0.000616495468914517	-1.05404462649516
385	TRAPPC1	-21.4967821601745	7.33850079171703	-9.95753325194852	2.02647207005282e-19	3.28834616757507e-18	24.9760797559286	-20.0101280545833	7.33850079171703	-8.9723671197109	1.53556429183525e-16	1.43052569206802e-15	19.8938741158619	5.04153235466094	7.33850079171703	2.29797600442057	0.0225345425368625	0.0503604545070731	-3.31736509469358	-3.90113292220767	7.33850079171703	-1.5331548901347	0.126722773259496	0.189856473698253	-4.38437401880891	12.4485173778458	7.33850079171703	5.07752576444697	8.33472463043057e-07	4.61069873172755e-06	3.53232046847317	15.388700358313	7.33850079171703	6.56770796913121	3.8522823708442e-10	9.58045876575167e-09	9.10803964846418	3.37556204713007	7.33850079171703	1.32728460915638	0.185836547714548	0.289326361711273	-4.59344625787468	22.4049391377948	7.33850079171703	9.85028895214715	4.22306593104735e-19	5.23989959340366e-18	23.6810688033073
386	HMGA1	16.9814116044326	10.1327017036171	9.00668983346611	1.22456439881364e-16	1.36940534921095e-15	24.9452067885106	16.8248751151085	10.1327017036171	8.54767284130639	2.44718180508127e-15	1.96323701613813e-14	22.1121590717585	-0.377182272171323	10.1327017036171	-0.18210908744389	0.855670445601287	0.900291538460289	-5.67231452394615	25.3592971208212	10.1327017036171	12.2771965421583	1.51207377966168e-26	3.39178902731953e-24	43.3937951088165	-12.2428513431699	10.1327017036171	-5.1258328208925	6.63934470012433e-07	3.7489685769705e-06	4.99396976141429	-12.9993214024598	10.1327017036171	-5.07890898731864	8.28080447901573e-07	9.98233964593677e-06	4.64411812617567	0.680373814594555	10.1327017036171	0.285553190588401	0.775498064573856	0.846051674492172	-5.52982222252016	-20.9538615697893	10.1327017036171	-8.56706355884351	2.15944615003947e-15	1.90764972636691e-14	20.730649368578
387	ITM2A	57.289577191726	3.5020553649288	12.2663919909266	1.63498815089913e-26	7.11188762216199e-25	24.9370189925601	60.1498849667648	3.5020553649288	12.7676511655443	4.30833516627641e-28	1.81872156096687e-26	26.327495757366	-0.88411688189836	3.5020553649288	-0.134248049749261	0.893333291643356	0.928916970646959	-4.86388629254774	33.2951011312743	3.5020553649288	5.59128721007391	6.86838953219546e-08	5.40618931573847e-07	1.72432960522998	-87.4521849219397	3.5020553649288	-9.49278138447208	4.78157483651449e-18	1.10284709938963e-16	4.20894114023081	-6.21757815170583	3.5020553649288	-0.763952415166884	0.445741666107784	0.562772835258034	-4.69517248260507	-49.4453737751439	3.5020553649288	-5.50129956103023	1.07646358516205e-07	1.04539417778046e-06	-0.964042752824131	-81.9762957946365	3.5020553649288	-7.80115263964364	2.71692917801944e-13	1.97218716983137e-12	0.682445849103459
388	PAWR	20.8288380227578	6.94311366330797	9.68378420556913	1.31303619184651e-18	1.9382108431902e-17	24.9293222379224	25.1177040275068	6.94311366330797	11.6674114372284	1.22152895481968e-24	3.17597528253118e-23	35.0458877544547	-9.61574091669148	6.94311366330797	-3.42807890417915	0.000729696748300825	0.00261193078866127	-1.157251522737	26.0933830283937	6.94311366330797	9.83948606842556	4.54655513053371e-19	3.1522782238367e-17	22.6440215654896	-12.9391889854819	6.94311366330797	-4.14226462875507	4.96005792703758e-05	0.000195127450774793	0.306531035355463	-5.22325989574458	6.94311366330797	-1.60718297728667	0.109496711808473	0.190053464282951	-4.28322440965359	-12.2722091414693	6.94311366330797	-3.54459428268992	0.000483363239823376	0.00191603446416473	-1.32359291054173	-14.8334282542822	6.94311366330797	-4.75709352253069	3.62070889665553e-06	1.0946329222447e-05	1.93796356108321
389	SEMA6A	25.8424357142264	7.35597775017587	9.46794162496201	5.65267636748468e-18	7.56334709286839e-17	24.9016241703105	36.2494771593154	7.35597775017587	13.2558240297207	1.22765700490296e-29	6.3838164254954e-28	45.1670463169029	-12.287443350392	7.35597775017587	-3.37363415046793	0.000881328017268212	0.00307390015778913	-1.17606688339121	40.265634171443	7.35597775017587	12.2774593612697	1.5092017443901e-26	3.39178902731953e-24	36.293046062987	14.0331802389779	7.35597775017587	3.7807763350028	0.000203072190620838	0.000688166203591087	-0.208857856734415	-3.59271613161077	7.35597775017587	-0.835505928096012	0.404369843596703	0.523065469329068	-4.9161473510545	-31.1417801954676	7.35597775017587	-6.54424554385314	4.39061760512045e-10	6.72405159338394e-09	6.73480466828805	7.17342480562217	7.35597775017587	1.96705338558517	0.0504763487976795	0.0745673334511175	-3.84656636884012
390	TRMT61A	37.3089186204949	3.70241611270054	12.1097729207467	5.06958911513436e-26	2.04211617877243e-24	24.8656499418771	34.6388290875436	3.70241611270054	10.7495848724284	8.26654602582112e-22	1.47764510211553e-20	19.2186204284481	-12.0220555903311	3.70241611270054	-2.71224519009542	0.00722935658203834	0.0192245093673916	-3.36086876277762	12.1974528292559	3.70241611270054	2.8686301065215	0.00453768245747958	0.0106288057562585	-3.1230406425834	-4.45448495729608	3.70241611270054	-1.04438726995263	0.29749097867499	0.391633693445556	-4.64397018966938	-20.0141961114465	3.70241611270054	-3.9036721770772	0.000127153869497111	0.000735038032868594	-2.28223945761736	-9.59381977731759	3.70241611270054	-1.98637206889642	0.0482749885250804	0.0974701497929614	-4.09512230467199	-23.2044291917874	3.70241611270054	-4.9787248409319	1.32066926800913e-06	4.26792554407471e-06	-0.355642165127152
391	ATIC	17.6856418906327	6.79729660306703	9.76357448283897	7.63087848853187e-19	1.15167875869135e-17	24.8640692342606	13.8607500171174	6.79729660306703	7.23969456204619	8.07493054759855e-12	4.28068607342574e-11	12.5040598548218	-5.95444331140755	6.79729660306703	-2.68138888433259	0.00790651502503911	0.0207407777772179	-2.68091603238333	12.5020378055141	6.79729660306703	5.33898097258383	2.39005149052013e-07	1.68573917753171e-06	4.04281020512589	-4.81174088398271	6.79729660306703	-1.94439016988508	0.0531662053150612	0.0928724062916935	-3.88917387073726	-4.37320880412245	6.79729660306703	-1.70464830001217	0.0897192462430843	0.162686349187016	-4.1798546922596	3.47093136837108	6.79729660306703	1.44555312618016	0.149773394132437	0.24386672770781	-4.46130820565138	-12.1104964182792	6.79729660306703	-4.93366826876918	1.62559417316919e-06	5.19028672650168e-06	2.57989539698127
392	HAS3	72.7611560641325	2.35689928686655	14.0387647698492	3.99571860942471e-32	3.80925174098489e-30	24.8010586066067	74.3197397115522	2.35689928686655	14.1704200558421	1.52300457581293e-32	1.20994252411805e-30	24.7330875257232	11.6941661901483	2.35689928686655	1.53776110710946	0.125592341626476	0.211011365575985	-4.41059879901329	59.0655617592145	2.35689928686655	9.32267017839935	1.49912917227571e-17	8.24521044751642e-16	8.53139467144049	-55.7772782584371	2.35689928686655	-4.9723516987342	1.36016400661981e-06	7.26776096951454e-06	-2.68379365874509	-45.9256116543429	2.35689928686655	-4.42190425540317	1.55982564652498e-05	0.00012601981212038	-2.86917882786226	-78.8827818974124	2.35689928686655	-6.08805135699382	5.26294673796692e-09	6.5544706566571e-08	-2.42068260132288	-15.8878501571152	2.35689928686655	-1.72625664975039	0.0857523813319732	0.120187228646514	-4.37368684237453
393	YRDC	24.7169502131502	5.19167192789493	10.7333012534229	9.2682808145633e-22	2.02732566957178e-20	24.7967262952698	24.3354414246479	5.19167192789493	10.2147243610164	3.44527237241059e-20	5.04014270337304e-19	21.9901375136747	0.786103738209094	5.19167192789493	0.273495103120551	0.784737869842856	0.84916772900135	-5.02536901280082	16.1830666813949	5.19167192789493	5.54774271915718	8.54195925792398e-08	6.60716794527724e-07	3.22019536180297	8.29105057476809	5.19167192789493	2.69721166030641	0.00755244027995218	0.0170818340851429	-3.00117392092547	-23.5623303762786	5.19167192789493	-5.94571560134483	1.11525710389447e-08	2.02195582702897e-07	1.9813749442295	-6.22964393237639	5.19167192789493	-1.78851374210604	0.0751154490084826	0.13927402539012	-4.14678749683566	-13.0059032207688	5.19167192789493	-4.03133400905566	7.72453658822575e-05	0.000189388552441711	-0.814418209962001
394	ARL4C	-76.54916680304	5.84672920050981	-12.1657526932132	3.38401928312449e-26	1.40265147097624e-24	24.7351747661121	-98.2297777577667	5.84672920050981	-13.5012553099016	2.04286892421515e-30	1.23653018481594e-28	24.4388819675822	21.1457519567306	5.84672920050981	4.47216209504476	1.2594303278058e-05	6.72636925774898e-05	1.59764496749687	-47.3932810051638	5.84672920050981	-6.30314245248517	1.65518787436588e-09	1.89543035863319e-08	3.89801619441501	-50.7371608361674	5.84672920050981	-6.4724173615627	6.54103315287986e-10	6.01039512200366e-09	3.94007244284149	47.0917352821329	5.84672920050981	9.66463326683123	1.49535168894499e-18	1.05597674824263e-16	20.8060698700726	-29.3033272464689	5.84672920050981	-4.69762639983691	4.71870858117645e-06	3.12939282137151e-05	1.12032152360376	12.1509174945282	5.84672920050981	2.13805348238528	0.0336523514605952	0.0516214566628456	-3.65672040786676
395	ZNF578	60.4684083854499	3.06110996626514	12.5422716879023	2.21539163520093e-27	1.11224460109776e-25	24.7314752765896	57.6371201202565	3.06110996626514	11.8410984964716	3.511331097962e-25	9.7736320585609e-24	22.2551474304671	21.740934660418	3.06110996626514	3.31624167683688	0.00107268609561393	0.00366095731915971	-2.64228893122655	54.2223760616585	3.06110996626514	9.4298734224422	7.30300722761456e-18	4.15653744696072e-16	11.5242029917905	-53.3263856309792	3.06110996626514	-5.58750912018542	6.99990111528732e-08	4.6688884108678e-07	-1.21064769409228	-43.5004695383814	3.06110996626514	-4.06044301615435	6.88293711882772e-05	0.000437283912637073	-3.06719626435707	-40.0698188932877	3.06110996626514	-3.94039364537469	0.000110309286221722	0.000519743918606466	-3.03612837900113	-79.0687136484659	3.06110996626514	-6.73964498459565	1.46420730811465e-10	7.88631431489244e-10	-1.18234818623637
396	PSMA3	12.6226084332169	8.29779490546898	9.25359837945305	2.37862712926914e-17	2.91032025228225e-16	24.7155959680645	12.8553415552897	8.29779490546898	9.16709068299468	4.23223256644563e-17	4.24116504288017e-16	24.0015995582789	-0.0601876504369514	8.29779490546898	-0.0370486798092501	0.970480916824543	0.98048847959177	-5.43133435702882	6.76244802705632	8.29779490546898	3.84698802689334	0.000158025916076381	0.000545015520022247	0.248035572677241	-1.79391421203107	8.29779490546898	-0.978683426489439	0.328847532463527	0.425086527839858	-4.9653241374931	-2.8920099814925	8.29779490546898	-1.50981003047408	0.132575025728814	0.220701148768572	-4.44134674966867	-3.34434090185969	8.29779490546898	-1.74714888605289	0.0820538732228473	0.149640731654611	-4.15203802536211	-3.17818855531883	8.29779490546898	-1.77448658888927	0.0774121862769089	0.109576269612452	-4.13000432413147
397	UTP4	29.0865840587534	4.41719940413803	11.3342655355596	1.32028008392026e-23	3.56226513208674e-22	24.6987201499875	30.2520409385278	4.41719940413803	11.4230912537335	7.00947602642143e-24	1.66365987017139e-22	24.2755002706581	-9.3727662174981	4.41719940413803	-2.78462901903112	0.00584191687517919	0.0160498843391487	-3.00278787421413	13.0678097635101	4.41719940413803	3.89612096757609	0.000130907942624479	0.000461363790395575	-1.21383982177039	-3.81336094173222	4.41719940413803	-1.06454922782685	0.28828618980691	0.381668095288862	-4.65158424889983	-12.329563329829	4.41719940413803	-3.11762846722568	0.00207498730099326	0.00754780754319966	-2.82963093832885	-7.33636808506413	4.41719940413803	-1.86981313744563	0.0628828483578929	0.120701306244009	-4.12290985525703	-23.215555378464	4.41719940413803	-6.12395916449441	4.34660001300815e-09	1.94618802930776e-08	2.66512882789313
398	PALLD	-74.9642805448822	4.98221136821605	-13.9685971054566	6.68046994318605e-32	6.31608067355772e-30	24.6796668026739	-84.6531263166114	4.98221136821605	-15.3832931855953	2.11086583981487e-36	3.13614353343923e-34	27.2310655454252	-4.65372210757837	4.98221136821605	-1.05968870810189	0.290487334639468	0.408352802688069	-4.71931139524985	-63.9231382970388	4.98221136821605	-9.34694340503393	1.27421412224043e-17	7.07621823224785e-16	7.92883030768188	4.76526757895427	4.98221136821605	0.938449960984152	0.349076956284162	0.445845749680787	-4.74113701098596	26.6488703896128	4.98221136821605	6.04211021285959	6.71512744464107e-09	1.26558579846283e-07	4.81976442263503	1.00528353694326	4.98221136821605	0.201834664620823	0.840238759725116	0.893339350488413	-4.97578635529979	-6.47790272698094	4.98221136821605	-1.23308021366133	0.218906001177991	0.276838896028766	-4.56608771067816
399	MAGED1	-33.9570626460663	6.05803444021152	-10.9248143544408	2.40690324555771e-22	5.64241252647136e-21	24.6032802752979	-48.485085318978	6.05803444021152	-13.6204421112337	8.54402651842223e-31	5.46053985311455e-29	30.9599006399349	20.4919682280255	6.05803444021152	7.43950882114597	2.45382979045117e-12	3.71320275168802e-11	12.1312489700473	-23.6020580446017	6.05803444021152	-6.09199315977959	5.15376403844033e-09	5.2952940298858e-08	4.49431777751974	3.45639065265448	6.05803444021152	0.996723557705533	0.320030534391297	0.415850671676107	-4.7759924194766	17.0162051128456	6.05803444021152	5.24369288374741	3.78754111202551e-07	5.03245880622205e-06	3.22629418283223	5.90447653578423	6.05803444021152	1.74618552533834	0.0822215020459373	0.149850881536645	-4.13530528616479	11.154002792836	6.05803444021152	3.50001419265862	0.000566572535450583	0.00120925182939453	-1.19945674557971
400	RFLNB	51.4663847479121	3.78146264313464	11.5835322252521	2.22737907803421e-24	6.80237945435318e-23	24.5235366914759	58.9782528413547	3.78146264313464	13.1869867934324	2.02914917594725e-29	1.0409626265846e-27	30.0283740293091	-35.3482317128641	3.78146264313464	-4.5787633883081	7.95303674531367e-06	4.4468592554442e-05	-1.34379526804523	50.3115935873875	3.78146264313464	9.33866982039335	1.34683264344425e-17	7.44336494734404e-16	12.9834458997215	-55.7865879603655	3.78146264313464	-6.56494282481424	3.9121877371928e-10	3.70491951270576e-09	1.01699808534693	-4.60663884542783	3.78146264313464	-0.613132515527032	0.54044335459181	0.647739337509723	-4.75565608709388	-10.0900804711151	3.78146264313464	-1.35763087673494	0.176018523339721	0.277247956355005	-4.48546467842368	-54.9625746576631	3.78146264313464	-6.70328313702815	1.79889274451006e-10	9.57178278939307e-10	1.52301599532889
401	CEP290	-37.344169185344	5.33424214356876	-11.675632129772	1.15163231619085e-24	3.70075103854587e-23	24.5166240988631	-46.972455017601	5.33424214356876	-13.1564101459639	2.5364117226285e-29	1.27265570644167e-27	26.3134739709852	2.32939536546173	5.33424214356876	0.774097288112774	0.43973227265407	0.559632573051792	-4.92206358280554	-26.1999589028823	5.33424214356876	-6.48150113156902	6.22040625161535e-10	7.84656106807832e-09	4.33851105158539	7.34322195696661	5.33424214356876	2.09932807765834	0.0369665705484877	0.0679353521405139	-3.76710982396453	18.1068397478346	5.33424214356876	5.3963472999079	1.80638375419644e-07	2.5896027754395e-06	2.91600250716383	14.157986482078	5.33424214356876	4.23500414066867	3.4010696531461e-05	0.000181052753987861	0.0392913350753341	12.7666625893462	5.33424214356876	3.8784389344867	0.000140114247117629	0.000328936381495112	-0.698034520316645
402	POLR1B	35.9120383189906	3.64266303036069	12.2918255983556	1.36022095365907e-26	5.98497219609992e-25	24.4724729502322	36.4045745281614	3.64266303036069	11.9396590546341	1.72799688031015e-25	4.99199098756266e-24	22.19044802868	-10.5347574544832	3.64266303036069	-2.73695901805504	0.00672529421442262	0.0180891976303663	-3.26251632004871	16.5820615983914	3.64266303036069	4.23568331045357	3.39160530936511e-05	0.000138918599137619	-1.1978601894715	-16.4392544429112	3.64266303036069	-3.89494930059964	0.000131499778251139	0.000466178327608624	-1.97278818442063	-23.6105998107105	3.64266303036069	-5.06862994086597	8.689723062009e-07	1.04313149873434e-05	-0.670878070912719	3.13149095354274	3.64266303036069	0.769092206213719	0.442691200743572	0.565726914265691	-4.74091593846649	-24.2197059224659	3.64266303036069	-5.46533095282091	1.28642645670912e-07	4.83307673719288e-07	0.233247760326633
403	TMCO1	-20.2449018077735	7.07040787105442	-10.0002041328615	1.51191571639349e-19	2.49946760051177e-18	24.4524669558097	-24.4330160705977	7.07040787105442	-11.2927130578103	1.77472363543845e-23	3.99258836320652e-22	29.1815961715069	7.21361589707027	7.07040787105442	3.64473266258024	0.000336414225792026	0.00131290669890464	-0.388411185080209	-5.20376690329388	7.07040787105442	-2.10651778297838	0.0363309003615568	0.0650024241689412	-3.6693957704364	6.3284577961615	7.07040787105442	2.76639214805788	0.00616661092133845	0.0143124424711122	-2.5405598357518	11.8439158737293	7.07040787105442	5.30551695517421	2.81136356754469e-07	3.83337296933388e-06	4.19230849134177	4.37684542401785	7.07040787105442	1.91933858306536	0.0562788469001498	0.110263745253933	-3.91420844745885	9.09789096152534	7.07040787105442	4.19377964942849	4.02530452710686e-05	0.0001036217006978	0.906948392846304
404	NLN	23.2172581576481	5.45795839037828	10.4304881381226	7.70501161910947e-21	1.47894853897001e-19	24.4483269976818	23.1012840626562	5.45795839037828	9.93708361017604	2.33152361856606e-19	3.10146862748787e-18	21.5572790453854	7.30448602117656	5.45795839037828	2.76977459505514	0.00610517987685854	0.0166889504877567	-2.69145297014967	25.2324394523133	5.45795839037828	9.28244113298842	1.9619159951077e-17	1.04879995252486e-15	16.2863970702923	-2.17680532671713	5.45795839037828	-0.725138993543898	0.469163252816628	0.564971327602339	-4.87729968740521	-24.7216806107257	5.45795839037828	-6.95214818139651	4.33813694522732e-11	1.24722477176624e-09	5.38793426504431	-8.45464084122957	5.45795839037828	-2.60252748808763	0.00990442182222479	0.026005642792346	-3.18180458852224	4.55421070630996	5.45795839037828	1.5855104307016	0.114335022604675	0.155398913935783	-4.30177179897519
405	PLBD1	47.4321590334411	3.71549526255133	11.9071977538618	2.18279729217167e-25	7.87735048026621e-24	24.4298252802529	42.6732450554471	3.71549526255133	10.1282214064564	6.26282735959739e-20	8.86717141012303e-19	17.1412344921169	0.846024727132002	3.71549526255133	0.167332492736264	0.867267317349393	0.908944307495983	-4.92021824619617	21.7250032127056	3.71549526255133	4.05169798229023	7.12612554421736e-05	0.000268786271763424	-1.3510116268467	-69.7594454396087	3.71549526255133	-9.51603738128832	4.08748088262827e-18	9.46574520187599e-17	5.58265332363911	-21.0705338668571	3.71549526255133	-3.27765475549041	0.00122239005849936	0.00490499553463089	-2.91608138712728	-23.1049143628031	3.71549526255133	-3.65150171732776	0.000328180567583397	0.00135488476837029	-2.43640039870566	-112.915485581856	3.71549526255133	-10.232436603894	3.0478280473084e-20	4.13117924895831e-19	1.30081940398304
406	ABCA7	58.6930964677282	3.30215264988376	12.4695977225158	3.75314857585103e-27	1.80403444150151e-25	24.3997316267512	59.8622716381632	3.30215264988376	12.5552141550321	2.01677920658561e-27	7.56457512240635e-26	24.296174866729	24.9178267532583	3.30215264988376	4.21863898435141	3.63690855607426e-05	0.000177652578486292	-1.06339975429262	45.0291227400328	3.30215264988376	7.69151480243922	5.32606899667381e-13	1.34503817487745e-11	6.39807515844958	-28.1326188236234	3.30215264988376	-3.69410591594275	0.000280561354976678	0.000914422193998061	-2.61341482647593	-49.1105992563052	3.30215264988376	-5.5086846493208	1.03768819973247e-07	1.56405177930692e-06	-1.09309793867406	-57.3106988245575	3.30215264988376	-6.20743355939611	2.77835146730176e-09	3.62834940478677e-08	-0.461721243155497	-19.2305063022206	3.30215264988376	-2.55611848130095	0.0112816867595474	0.0190610687533928	-3.71120729149514
407	ARID1A	-24.0058022154124	6.62691688396563	-10.2660666967736	2.41454640823365e-20	4.31600170471765e-19	24.3971940886209	-19.1570368248031	6.62691688396563	-7.78770747017667	2.95151387147257e-13	1.86961897506346e-12	13.1266513430557	6.20272807071854	6.62691688396563	2.6867765720424	0.00778430499835616	0.0204709628183188	-2.64748071445559	2.26281293685356	6.62691688396563	0.846309369597486	0.398330700328679	0.487943378494494	-4.91528784226921	12.8414759786686	6.62691688396563	5.07763542217329	8.33043760629945e-07	4.61055666260598e-06	3.20469675809402	4.64436216864076	6.62691688396563	1.70685435921887	0.0893075569635349	0.162145445431335	-4.17761030001003	11.910589773103	6.62691688396563	4.43069311291654	1.5027492517593e-05	8.82065235511871e-05	1.10254962664765	13.1733427791835	6.62691688396563	5.30936116140243	2.75951681008895e-07	9.88999759004312e-07	4.02281926873082
408	GRTP1	43.3646491571715	4.14000620851406	11.3436796274985	1.23465595817542e-23	3.34702942216276e-22	24.3916356136569	51.722276008139	4.14000620851406	13.6191627685964	8.62436827239544e-31	5.48126516867799e-29	32.9302403401296	22.0802480845095	4.14000620851406	4.67721672121435	5.16483367116872e-06	2.99775226779148e-05	0.520567488430506	35.8772768026585	4.14000620851406	7.55522037980865	1.22099365758331e-12	2.80485290015121e-11	7.86484591319209	-61.4744949691849	4.14000620851406	-8.00478703365697	7.68102073775507e-14	1.14266420337995e-12	3.06629560430951	-8.95772406003831	4.14000620851406	-1.30677373302867	0.192699763115306	0.29562629610287	-4.51176299126013	-50.6299239466134	4.14000620851406	-6.92874485881971	4.96553369123647e-11	9.08891286843924e-10	1.84731896431086	-24.7726802903815	4.14000620851406	-4.09958919162038	5.88800605797721e-05	0.000147393412042143	-1.56120549877042
409	PLPP2	70.3441739557694	3.02548145287362	12.666788816276	8.96938882618672e-28	4.81736188598949e-26	24.3541805995973	77.2037020604559	3.02548145287362	13.9460484206918	7.88005948418516e-32	5.63424253119239e-30	28.2740180419556	68.9884765196196	3.02548145287362	11.0319107432656	1.12931204458187e-22	4.87521878868549e-21	16.5021468697889	53.8142260490074	3.02548145287362	7.51235897731533	1.58233158297542e-12	3.5355221307107e-11	5.27002237347198	-86.3993644892708	3.02548145287362	-8.08894029597824	4.53500001568871e-14	6.90817578954446e-13	1.86667332325841	-37.1553983210283	3.02548145287362	-3.53977594107929	0.000491769769713062	0.00229345542825823	-3.18025487649422	-24.0305193209012	3.02548145287362	-2.40464199341678	0.0170444179019221	0.0408010338560344	-3.96242015229688	-45.5036806936226	3.02548145287362	-4.26013645673132	3.06714510091752e-05	8.02452751418781e-05	-2.57903724181234
410	HSPA2	52.7713998980376	3.36972835450284	12.2566575823266	1.7542456253906e-26	7.57304526583714e-25	24.3485649893415	61.4672706113673	3.36972835450284	14.3980937426355	2.87172522884446e-33	2.5868139069276e-31	31.3637916929055	-11.9918472815296	3.36972835450284	-1.84060127658445	0.0670721868880224	0.126263916076843	-4.19845743436037	30.5284290734602	3.36972835450284	5.24294776911367	3.8011134877464e-07	2.55042453371372e-06	0.526502431508436	-28.0334825540952	3.36972835450284	-3.60836858963069	0.000384080907187592	0.00121311031977528	-2.91723769706134	-40.7127397248145	3.36972835450284	-4.6817718168898	5.06187117237019e-06	4.82967524703211e-05	-2.18107808818175	-11.4504027940204	3.36972835450284	-1.5389942598065	0.125291055035646	0.211064520068957	-4.41217297853104	-46.3551181519751	3.36972835450284	-5.78233361242131	2.60245563742743e-08	1.0755813761622e-07	-0.537916125629563
411	PFN1	13.6617823117827	10.1429720205299	8.90568841087915	2.3809380450999e-16	2.55036809325308e-15	24.3125431815987	15.7121872516448	10.1429720205299	9.8595309538909	3.96455879670232e-19	5.10749466602191e-18	29.5468140104198	0.850726890887495	10.1429720205299	0.510183756742991	0.610451405608775	0.713628048248966	-5.5718735301077	19.0602417188132	10.1429720205299	11.1972930076123	3.4971086740071e-23	4.54624127620923e-21	36.7476148031364	0.384437036789189	10.1429720205299	0.208521633536804	0.835021109750445	0.878323050344345	-5.58086983519128	-6.94145483855713	10.1429720205299	-3.55149737514519	0.000471554398354023	0.0022108943922828	-0.3291752095906	-1.07133808485171	10.1429720205299	-0.546055336818717	0.585599805058243	0.694439905656297	-5.41904037388438	-16.3352167457332	10.1429720205299	-8.44719568205513	4.66913804704832e-15	4.03131617043266e-14	20.2596774723334
412	AEN	36.2637952519338	4.74293263015544	10.6660752667354	1.48543744980913e-21	3.17041127347322e-20	24.3079667356514	29.57423324574	4.74293263015544	8.32067225902389	1.04785234518447e-14	7.79048494451177e-14	14.1440882726574	4.88303163022818	4.74293263015544	1.09193093973262	0.276097943675817	0.392710152497258	-4.67428506842024	33.9277591681665	4.74293263015544	8.09111904706559	4.47338754299169e-14	1.36468142644867e-12	11.1122352940369	-29.0943047494685	4.74293263015544	-5.27371193763881	3.2782412231677e-07	1.94115318804547e-06	0.943457844612651	-21.6150058656061	4.74293263015544	-3.62878215105023	0.000356592120481218	0.00175761045166098	-2.20367051037278	0.773325037561075	4.74293263015544	0.14260006428485	0.886740949053618	0.925159578075728	-4.90684715425141	-35.2880720335756	4.74293263015544	-6.14710768716647	3.84080404457272e-09	1.73328592780718e-08	2.46733570536629
413	DCAF13	17.4247514554647	7.12824775852372	9.52405413686963	3.87222361408128e-18	5.34357516828586e-17	24.2171648968525	16.3825743354217	7.12824775852372	8.68517974166709	1.00512021744473e-15	8.49857744831317e-15	19.7375688451466	-5.34263168700078	7.12824775852372	-2.36418424370492	0.0189695825375349	0.0434051576677276	-3.22742652583803	5.58897570755904	7.12824775852372	2.3349880756969	0.0204754002392207	0.0396611206801024	-3.29715698240808	-6.87850856915909	7.12824775852372	-2.74020704386509	0.00666146811931858	0.0152995774513159	-2.62807868240147	-6.07375911426552	7.12824775852372	-2.28670199375612	0.0231967758085461	0.0551248681449455	-3.4182141210458	0.250828096488672	7.12824775852372	0.0985732380026684	0.921569892844231	0.949199565511659	-5.17458563852912	-7.06234634931703	7.12824775852372	-2.88426122161167	0.00432655330792962	0.00788525885657398	-2.33296959534003
414	ANKRD12	-24.2048273924482	6.36100708846812	-10.4748333250585	5.65674742000137e-21	1.09683373703077e-19	24.2049107963602	-24.412462370014	6.36100708846812	-9.89285969002732	3.15638500920558e-19	4.1314696230334e-18	20.5700572918671	4.6242328912013	6.36100708846812	2.03933616925327	0.0426522514914775	0.0864378666186895	-3.74752433366155	-1.16871479490706	6.36100708846812	-0.442227766420618	0.658773434397211	0.731118363358953	-5.05424929721351	12.3651289096528	6.36100708846812	5.08299750922455	8.12339804671912e-07	4.50687069129325e-06	3.06821188105449	14.3420526275984	6.36100708846812	5.65540236588721	4.97150976188395e-08	7.83389417024138e-07	4.60404171462781	5.47694340647535	6.36100708846812	2.08757377348148	0.038026358097395	0.0802828327878222	-3.7150552272373	18.4563750529819	6.36100708846812	7.74578276487085	3.81931455946863e-13	2.73080991002007e-12	12.5227038233859
415	SLC7A3	55.4543760997912	3.54202438597732	11.9793580634899	1.29831229559603e-25	4.80669665424551e-24	24.1647183876773	55.714353454599	3.54202438597732	11.9058639831054	2.20384743880392e-25	6.2872854613259e-24	23.6317405430905	-16.9104329947708	3.54202438597732	-2.40899536423928	0.0168479216601396	0.0393186911040386	-3.73286572449125	42.1211185602229	3.54202438597732	7.39971087968672	3.11533895731188e-12	6.56343971853552e-11	6.39664025285481	-46.3031253422465	3.54202438597732	-5.41905860951539	1.61591366141767e-07	1.01016679161848e-06	-0.810846045555428	-24.5457818330004	3.54202438597732	-2.8299156458774	0.00510166768842098	0.0159549148046845	-3.62377026859106	-13.2234174533129	3.54202438597732	-1.72118122065087	0.086671064485139	0.156242826616765	-4.29800359334084	-62.6777998662427	3.54202438597732	-6.65320459181849	2.38587750894673e-10	1.25089086628555e-09	0.164589666282789
416	IGF2BP2	-24.9341854611356	6.99773012980404	-9.98429246199051	1.68649969350814e-19	2.76016544974723e-18	24.1460075061098	-25.6684165325124	6.99773012980404	-9.73012149664084	9.58255282976332e-19	1.1864113027326e-17	22.1233715965152	1.26019522956902	6.99773012980404	0.503895022103986	0.614856326101038	0.716872846575201	-5.20050670350681	2.77511874155214	6.99773012980404	0.965310095174926	0.335485050905619	0.42492792098763	-4.86907204632629	4.61529455826711	6.99773012980404	1.56813973199244	0.118334033594685	0.182789811547825	-4.3343455288208	9.1168311996024	6.99773012980404	3.31144747558005	0.00109030950211674	0.00446745727228348	-1.40326786639584	6.63143709151574	6.99773012980404	2.37526292680057	0.0184242362694264	0.0436202944789399	-3.23435925179082	1.58621997246333	6.99773012980404	0.564324722886888	0.573127368544787	0.634773656322234	-5.09794777307842
417	SDHB	21.9507714907746	6.13738117445329	9.92216428757071	2.58251151751346e-19	4.12049257466582e-18	24.1412699327633	22.2069112215178	6.13738117445329	9.74028686894355	8.94209846415936e-19	1.11193050467373e-17	22.8378828983941	-13.9320576979336	6.13738117445329	-4.83615736062191	2.5363825890096e-06	1.56759680271582e-05	2.02109171759252	16.1386115989345	6.13738117445329	5.72151449529838	3.5530764569845e-08	2.99096355172205e-07	4.74628016608161	-6.85544546998124	6.13738117445329	-2.23595291120228	0.026392823650776	0.0507537237459871	-3.54172694649906	-4.54605661114997	6.13738117445329	-1.4115625916368	0.159539005661218	0.255141858179874	-4.45682434507198	-10.8247002813802	6.13738117445329	-3.27296310971443	0.00124186189697546	0.00436937127535847	-1.98255378267888	8.5222661078577	6.13738117445329	3.00560993825902	0.00296879536497513	0.00558878047972939	-2.22179023172731
418	ARID4B	-21.9657323067486	6.9834660734883	-10.0056651439491	1.45624158699373e-19	2.41091226558731e-18	24.1403161729011	-26.4628410140646	6.9834660734883	-11.1342452203489	5.47035192725141e-23	1.15462778685897e-21	27.7662756548259	2.37119260710127	6.9834660734883	1.09709781974201	0.273838326397086	0.390320265883711	-4.84784024501747	-0.301972073749207	6.9834660734883	-0.116919800532806	0.907033860172553	0.932231040134395	-5.17099525257265	12.0986882259136	6.9834660734883	4.99860796996548	1.20446102353425e-06	6.47815425915929e-06	3.11725685944092	6.32080063063647	6.9834660734883	2.52953251855234	0.0121456398366834	0.0326451693496537	-2.98875368173566	3.4313226145308	6.9834660734883	1.39450578882059	0.164618760758508	0.26269195467671	-4.52254801791323	19.8705230549162	6.9834660734883	8.92248135639423	2.13222812197041e-16	2.05671920028175e-15	19.0198410249494
419	C6orf132	55.4322778626812	2.90195691091487	13.1433212173212	2.79058890631587e-29	1.90025816001509e-27	24.1388937406804	55.2514335413834	2.90195691091487	12.9160047081012	1.46340821437902e-28	6.59109841436848e-27	23.072643406363	34.1946443606553	2.90195691091487	6.78015283340425	1.16321476171562e-10	1.41269443692614e-09	3.87389991850392	43.9174500116081	2.90195691091487	8.28151916284747	1.34406905544791e-14	4.52239705715413e-13	6.6307367079491	-47.5159120085671	2.90195691091487	-6.25985916790682	2.09338155849348e-09	1.77876344179632e-08	-0.336478319814332	-51.6916949156996	2.90195691091487	-6.24427004187867	2.27758616620011e-09	4.76336119585545e-08	-0.883882301495566	-30.9669519569429	2.90195691091487	-4.31499660779835	2.44382306201381e-05	0.000136510428854678	-2.30761131186645	-44.3874930189702	2.90195691091487	-5.47492953216887	1.22678479304448e-07	4.62571457891524e-07	-1.57753053308171
420	PHIP	-20.5046931289643	7.16398949307957	-9.87172309427822	3.64746450923922e-19	5.71602657338311e-18	24.0778063816877	-15.9485981205855	7.16398949307957	-7.47204297150729	2.01778376492999e-12	1.16113914843054e-11	12.961156243029	0.615024369809039	7.16398949307957	0.290490591444645	0.771723794178762	0.840128133899695	-5.27340694148674	2.11510584286201	7.16398949307957	0.88163071903034	0.3789710858455	0.468695051034867	-4.93722438943114	9.1078108966434	7.16398949307957	3.8072718032813	0.000183754525922931	0.000628834499434186	-0.255357934630145	2.18561032815713	7.16398949307957	0.886806232145903	0.376184174197383	0.495457857796231	-4.91943487764251	10.1938337360604	7.16398949307957	4.29205476488325	2.6881029309593e-05	0.000147774615714437	1.03945707992733	9.56379122014181	7.16398949307957	4.27513114597077	2.88311102946528e-05	7.58748336256792e-05	1.1628464986595
421	NOCT	57.3973040432054	2.60641711284826	13.689311004552	5.1620438911986e-31	4.40699866532179e-29	24.0522472568163	52.5401235583836	2.60641711284826	12.2302921732874	2.12268065185894e-26	6.91836656902172e-25	19.5118064287158	-15.715272009895	2.60641711284826	-2.42900628226394	0.0159702268165173	0.0374921803367448	-3.90044199858365	41.744731371654	2.60641711284826	7.68712651444992	5.47093467934689e-13	1.3785791350601e-11	4.39140821951928	-12.1759850413402	2.60641711284826	-1.7212999507469	0.0866494825709838	0.140406526998875	-4.3587682288773	-35.0495205532227	2.60641711284826	-4.58984691259966	7.57836161060506e-06	6.84806136060995e-05	-2.42389234019734	-18.2466941148249	2.60641711284826	-2.60638983019029	0.00979689913501791	0.0257706429304679	-3.85638050153981	-32.8960727654559	2.60641711284826	-4.36865084888047	1.95278993869285e-05	5.28630309953767e-05	-2.58249427988846
422	SCNN1A	81.3230906213761	2.28305234410711	13.8811507312272	1.26745225480032e-31	1.15076617419965e-29	24.0462324571816	83.6009651830063	2.28305234410711	14.0171325035523	4.68180700547146e-32	3.52367579885483e-30	23.7947543611726	75.719265528803	2.28305234410711	11.5658073393471	2.52855967941623e-24	1.21540851817318e-22	15.2314765487085	75.7525358788995	2.28305234410711	11.1745071601955	4.11115288473134e-23	5.16830648366226e-21	13.5147134157873	-60.762021488775	2.28305234410711	-4.70175828475322	4.63303057528942e-06	2.25443937819273e-05	-2.9608105822159	-76.2282333420419	2.28305234410711	-5.74987141501629	3.07381942605922e-08	5.08157431128865e-07	-2.3112171283884	-76.4033131204372	2.28305234410711	-5.30032636998027	2.88287437590383e-07	2.5349794665903e-06	-2.89067336133058	-56.4516299185318	2.28305234410711	-4.25367517276607	3.14986557959446e-05	8.22704617136086e-05	-3.31001478492836
423	FGFR4	65.821168807877	3.26874406889915	12.3048110255188	1.23823454360041e-26	5.4904663483677e-25	24.0039068637468	67.4342882758389	3.26874406889915	12.418839279348	5.42234940757324e-27	1.88546131375799e-25	23.9390387217359	78.734365799452	3.26874406889915	13.9493327578081	7.69277410405234e-32	7.0404268600287e-30	27.2764640889259	45.8716968778282	3.26874406889915	6.87138838187337	6.90616471071084e-11	1.08674723920952e-09	4.45635743772448	-69.3517720833059	3.26874406889915	-6.73247326698926	1.52496185681561e-10	1.53570102482135e-09	0.341881971039268	-45.5098949041653	3.26874406889915	-4.61551126050113	6.77489755671802e-06	6.20535052432779e-05	-1.97966632541003	-23.9704974322767	3.26874406889915	-2.72833305320045	0.00689749673951459	0.0190735708726243	-3.59285450030552	-88.9936506872717	3.26874406889915	-6.92513379315035	5.06998824462278e-11	2.88273685479546e-10	-0.938201983552247
424	CCT5	12.6382894813989	8.72397490491124	9.03775670842056	9.97427310377499e-17	1.12498659654693e-15	23.9875795763436	10.8724073222919	8.72397490491124	7.51713811826718	1.53731012756101e-12	8.92732378644564e-12	15.803490424219	-8.11833619360289	8.72397490491124	-4.75943859135429	3.58290791363901e-06	2.14824248071437e-05	3.34130232783792	5.05435309684077	8.72397490491124	2.80722959446883	0.00546109764168491	0.0125325891716902	-2.2949075840828	1.92901633202052	8.72397490491124	1.0698114318541	0.285915936078378	0.379364220451943	-4.94954614521189	-8.33042050489158	8.72397490491124	-4.30945198119104	2.50083391534829e-05	0.000187480602828208	1.56860347194839	8.43363185770358	8.72397490491124	4.64479325686068	5.95831887218026e-06	3.84234317349167e-05	2.79339736347113	-4.40695608688177	8.72397490491124	-2.44782820192868	0.0151818827341099	0.0249684787921531	-3.02956710942183
425	MRPL16	20.9030712687447	6.48783639813432	9.68993355881433	1.25932133022175e-18	1.86373040332947e-17	23.9659797736836	23.7101110494484	6.48783639813432	10.682532119175	1.32354853819224e-21	2.31874353398457e-20	28.3237023204787	-12.666219975492	6.48783639813432	-4.44763888690366	1.39831040990197e-05	7.40586624503633e-05	1.16454634046726	17.0620496305226	6.48783639813432	6.2030071120701	2.84535625199388e-09	3.11491631797225e-08	6.76001556003077	-2.70245918870206	6.48783639813432	-0.89553763922657	0.371511446352934	0.469053189082614	-4.8580510841617	-7.11332212670402	6.48783639813432	-2.27472541288663	0.0239188583994775	0.0565588549173259	-3.47797011811732	-3.71157598150975	6.48783639813432	-1.13672384619944	0.256931949290572	0.373576703086444	-4.67326937147551	-4.8256195930287	6.48783639813432	-1.66401327625322	0.0975813532484565	0.13495293534361	-4.2251326943606
426	MRPL34	17.0804613633279	7.03588055008454	9.47785190374615	5.28767355702819e-18	7.11658652851794e-17	23.9583192113587	22.8947173392911	7.03588055008454	12.519697391506	2.60967500021679e-27	9.53823706149525e-26	39.2462540760827	-8.9685379598518	7.03588055008454	-3.8576498082464	0.000151723753080687	0.0006393074531282	-0.0857820087015693	19.0082572892556	7.03588055008454	8.45664966499772	4.39444395632636e-15	1.59595044001186e-13	16.5052109952317	1.79973591236412	7.03588055008454	0.741823675917065	0.459011975717133	0.555260336491911	-5.00554577641387	-1.67348792720962	7.03588055008454	-0.626421181150474	0.531709988640722	0.640223373334371	-5.0036831263937	-10.7189104287671	7.03588055008454	-3.93700939856515	0.000111768247170279	0.000525751952149665	-0.290668567267224	1.57581194471429	7.03588055008454	0.66715235924277	0.505397468951545	0.571036745165993	-5.05893531577661
427	DDX39A	19.0994373455486	6.93793316522138	9.48131293721208	5.16580117470234e-18	6.96074975719609e-17	23.9490789751609	25.7094969507647	6.93793316522138	12.5304121688018	2.41448401167903e-27	8.91022486890584e-26	39.1766989810514	-19.2849269309241	6.93793316522138	-6.9981370798454	3.32419837365652e-11	4.32637422009449e-10	9.6688231673014	15.5282926191714	6.93793316522138	6.00185236679518	8.30526250134308e-09	8.14157695075963e-08	6.52987472236272	4.03548136617619	6.93793316522138	1.48224598619939	0.139753938915012	0.209871812852307	-4.42887937820123	-9.04085310544027	6.93793316522138	-2.9487363482016	0.00354717307463999	0.011779796130776	-2.36746084902006	6.21337596767109	6.93793316522138	2.20105739670837	0.0288068465764504	0.0634604900509518	-3.53172725556924	-0.0560449544743982	6.93793316522138	-0.0208142547781229	0.983413326379385	0.986863899454401	-5.20235988393557
428	TMEM132A	-53.4321577799334	5.19978849986172	-12.8883191511177	1.79030112507369e-28	1.09524304122155e-26	23.9228297661185	-55.0732806392548	5.19978849986172	-12.6052721939832	1.40226902718411e-27	5.4195802942521e-26	21.5855267245671	20.3959352641928	5.19978849986172	6.43289650570658	8.13556118377308e-10	8.82187866752265e-09	7.15890092174089	-45.1046213520437	5.19978849986172	-8.77200173843617	5.71187686643863e-16	2.40234821147272e-14	8.18844705986895	51.0988752912404	5.19978849986172	16.0090195872065	2.18632203867022e-38	1.78653743731338e-36	43.1145850339108	24.5734665864619	5.19978849986172	6.9022610201715	5.78373385972271e-11	1.62569816597611e-09	7.67740363465833	15.6795502843892	5.19978849986172	4.28548871188213	2.76221386741525e-05	0.000151339686988652	0.180045600252605	41.3276505208799	5.19978849986172	12.8706818865354	2.03561763248927e-28	4.93378510925365e-27	31.4545220633598
429	NMI	54.8760133260616	3.07708149880902	12.4999370190933	3.01189931582842e-27	1.46000543106259e-25	23.9079101901399	51.9406742301674	3.07708149880902	11.4679197872446	5.09007672628589e-24	1.22076473267737e-22	19.9266921781883	4.21004405384778	3.07708149880902	0.705458674989335	0.481296211107303	0.599069518016272	-4.75516286999097	28.2325023926336	3.07708149880902	4.91490435417696	1.77177255213118e-06	1.00292320615441e-05	-0.125200952270007	-29.0460126193858	3.07708149880902	-3.60131815176321	0.000394029719029393	0.00124110682425558	-3.06151412503847	-35.8742767271058	3.07708149880902	-4.2099638979902	3.76818727876801e-05	0.000263335751185743	-2.64659086207471	-54.4965313777173	3.07708149880902	-6.63742403087738	2.60722036110476e-10	4.19502122799415e-09	0.252606678637563	-74.1334948207252	3.07708149880902	-6.7325320247506	1.52445415681459e-10	8.18383648707597e-10	-1.48411564912591
430	LARGE2	64.7640060161493	2.67420285690262	13.0612115483754	5.07919926135501e-29	3.33942756033916e-27	23.896714453725	65.1396548279793	2.67420285690262	12.8437030695315	2.47735439422561e-28	1.09848582441632e-26	22.611327006063	45.7954460472546	2.67420285690262	7.72676147658812	4.29207715648275e-13	7.10584119683975e-12	6.02623232060789	58.8704892495122	2.67420285690262	9.86338645054283	3.86142779161092e-19	2.70528808400417e-17	10.9778177330446	-89.796108440036	2.67420285690262	-7.62162996009237	8.15807839286348e-13	1.10201038121384e-11	-0.775432429922739	-69.9862853405879	2.67420285690262	-6.20299599821251	2.84552646478142e-09	5.83383920378127e-08	-1.70708296299931	-59.6667640551048	2.67420285690262	-5.45416600166528	1.35935914342356e-07	1.28415099923745e-06	-2.18941615330228	-29.526177774808	2.67420285690262	-3.34081296236519	0.000986453882359541	0.00202385803697868	-3.33530334053988
431	RAD51	33.3918636407888	4.14227794778173	11.263606016536	2.18299412559073e-23	5.76754106160691e-22	23.8880085011115	16.9255487162208	4.14227794778173	5.17457217111481	5.26984251863252e-07	1.53989778833093e-06	2.24273031502459	7.98325069883894	4.14227794778173	2.19339079643228	0.029362158635589	0.0629503550957904	-3.70376944042704	6.20043555164535	4.14227794778173	1.48945973336661	0.137846670559106	0.203505731216438	-4.39295981733078	-21.148969255857	4.14227794778173	-4.73043162561231	4.07848126932007e-06	2.00765170916616e-05	-0.368181097680317	-15.0039397381406	4.14227794778173	-3.21383493463623	0.0015132878622742	0.00584592259964964	-2.79709686661193	30.8948433495611	4.14227794778173	8.07274009767211	5.02024539576713e-14	1.49561477415562e-12	8.70810427596272	-113.507922081352	4.14227794778173	-15.1085549539079	1.57629516589505e-35	6.51327563980488e-34	7.82037684941278
432	KDR	70.4090143979697	2.94049397620395	12.6362510511569	1.11973889777713e-27	5.8760610048488e-26	23.8752806842429	80.5577513817908	2.94049397620395	14.3646250435205	3.66996700963572e-33	3.28003301486193e-31	28.6837741316776	-67.0355319426123	2.94049397620395	-6.1860739694174	3.11661967814015e-09	3.12755518578274e-08	-0.654431711805782	65.4038778670524	2.94049397620395	9.71329687849901	1.07442959514951e-18	7.14620614448281e-17	11.2968535336905	-69.9298387734306	2.94049397620395	-5.97873176479862	9.37944826378054e-09	7.20623828996973e-08	-1.30392194775911	-12.899555357162	2.94049397620395	-1.28473240727821	0.20028227204772	0.304522752821094	-4.52939177163239	-73.4337395264897	2.94049397620395	-5.89779765067089	1.43225117481053e-08	1.66175998375583e-07	-1.68987732373343	-47.2146494594307	2.94049397620395	-4.34394109898673	2.16586236912596e-05	5.82999188301199e-05	-2.58348203057521
433	CTSC	24.483902770646	6.96283074514266	9.47524912693356	5.38120323979075e-18	7.22546538300541e-17	23.8539366320056	25.2239684579657	6.96283074514266	9.55066058879818	3.2354069209629e-18	3.71617019837506e-17	23.9575744845403	-0.847196932463728	6.96283074514266	-0.262909738322622	0.792874474013808	0.854980109597319	-5.2230816712058	19.1522801971387	6.96283074514266	5.80249658597549	2.34606894058774e-08	2.04409967100714e-07	5.83164298019481	-2.31538613329692	6.96283074514266	-0.630439001435995	0.529083712160659	0.62128835059462	-5.02199437317897	-18.4620467886123	6.96283074514266	-4.49014492738807	1.16611725247071e-05	9.81632183095288e-05	0.844276195397163	3.06892675318759	6.96283074514266	0.798277129830149	0.42559949184657	0.549098701559125	-4.91713047315363	-9.56341121348734	6.96283074514266	-2.67819460359936	0.00797978613199633	0.0138673482227006	-2.75425077120877
434	DUT	19.5461292829178	7.9040000952446	9.15659598959576	4.53797688890458e-17	5.37973633254595e-16	23.8412929322994	-0.265409236059585	7.9040000952446	-0.110698090745818	0.911960074118845	0.927279641624708	-5.44281909233903	-13.1471501919095	7.9040000952446	-4.82582658311166	2.65777711193714e-06	1.63291998714076e-05	3.18103174717526	8.35977304161908	7.9040000952446	2.95506179413371	0.00347809136506774	0.00842281228119707	-2.04852410674284	0.297940901752153	7.9040000952446	0.102831943370812	0.918193174633161	0.941687919294254	-5.29467351599172	4.60922307655171	7.9040000952446	1.53524604395833	0.126208589415686	0.212859540456354	-4.3998635968282	21.9666909040543	7.9040000952446	8.03820208136944	6.23299372550244e-14	1.81438799541343e-12	15.9718804335527	-11.4677172092477	7.9040000952446	-3.89428504611411	0.000131836435148682	0.000311163362513086	0.178174195961367
435	CDC123	12.9522610422438	7.26246984574867	9.39867827889263	9.00603892302e-18	1.17345199634794e-16	23.7779564162149	10.4849086532831	7.26246984574867	7.27442433386326	6.57353089107452e-12	3.52395470449356e-11	13.1826446909202	-6.61534278489066	7.26246984574867	-3.91209034739574	0.000123089297499485	0.000530373470204939	0.206437991787419	7.35422527964923	7.26246984574867	4.09995537830066	5.87938142961699e-05	0.000226617666963674	0.573712336780051	-1.78289455076038	7.26246984574867	-0.951749478140038	0.342303612509779	0.438860621664448	-4.88537201806607	-4.59546104408543	7.26246984574867	-2.32751374257917	0.0208773856452974	0.0507732337972369	-3.34200855167323	-1.65768189581764	7.26246984574867	-0.85379482493352	0.394178583616109	0.519875835435587	-4.92825113546852	1.2238061030726	7.26246984574867	0.693059770871327	0.489027612964732	0.554127960807898	-5.0719721231992
436	CCT4	11.4666495991704	8.5296722871717	9.04107255414975	9.7580644688392e-17	1.10308554865139e-15	23.7724887139835	11.3795592693426	8.5296722871717	8.73716440693197	7.16791261139618e-16	6.16085050896862e-15	21.9332247158156	-3.18125931271094	8.5296722871717	-2.09961346157328	0.0369411580225807	0.0764760853742894	-3.65772435262646	11.5728111365494	8.5296722871717	7.28849389006153	6.04695337692265e-12	1.18132457129427e-10	13.3145126726269	-5.47961714777931	8.5296722871717	-3.25628138750687	0.00131345681745712	0.00364265357374775	-1.30344138626696	-6.24209093251598	8.5296722871717	-3.52884351003164	0.000511355379481845	0.00236934205802848	-0.687260882820285	-1.45788355365317	8.5296722871717	-0.838171768714912	0.402874529771498	0.52806315171994	-5.0662223301032	-3.9771776346439	8.5296722871717	-2.41397963911711	0.0166254096279935	0.0271978673164944	-3.09917738457847
437	HMGB3	19.1975278367077	8.82959742219572	8.97123018939077	1.54710920652542e-16	1.70674342552081e-15	23.7625895814631	20.6958460278148	8.82959742219572	9.39276217022675	9.37097077958162e-18	1.02196287624799e-16	25.8415259601187	-2.35905554916498	8.82959742219572	-0.919706127522218	0.358767524819098	0.480540976926645	-5.13250731327373	15.9202491233738	8.82959742219572	6.22251103792692	2.56152570310912e-09	2.82310732596997e-08	9.16482971963431	-12.3825860877335	8.82959742219572	-4.08810732030268	6.16463582890755e-05	0.000237372715862344	0.895388811798027	-10.2522243648004	8.82959742219572	-3.29048529397842	0.00117057983038729	0.00473195521541718	-1.26983520118238	2.18987066892719	8.82959742219572	0.745296363205143	0.456914817755283	0.579046903636133	-5.15472248134836	-5.33003604911079	8.82959742219572	-1.90116069389884	0.0586318993364831	0.0853153050635165	-3.96541791527535
438	MAP4K4	-27.5762287023494	7.0101484742463	-9.93206039150009	2.41319470532756e-19	3.87155931361685e-18	23.7539523619592	-31.6840654038174	7.0101484742463	-10.5941917697989	2.45749649672956e-21	4.20235574328643e-20	25.4360054431884	5.29749781886397	7.0101484742463	1.94238366471073	0.0534100599159774	0.104482059753554	-3.88347476365922	-6.05599609042488	7.0101484742463	-1.85397455411067	0.0651264228729566	0.107587910132364	-4.00227139483629	34.4745490888954	7.0101484742463	12.2226278935242	2.24360863616629e-26	9.2660226706651e-25	33.9828127235555	-0.239184487124222	7.0101484742463	-0.0747580722032768	0.940477418638612	0.959260134560068	-5.18600255566961	20.3067707401332	7.0101484742463	6.51878715713231	5.05850645969194e-10	7.65467115064495e-09	8.15106909710425	39.6436973237487	7.0101484742463	15.2529995432666	5.47594078500118e-36	2.37290767350051e-34	50.1220404888644
439	TUT4	-24.3558520756688	6.34526791558433	-10.3372263407795	1.47383457580375e-20	2.69770680755118e-19	23.6802682101487	-21.1648975498029	6.34526791558433	-8.61525133649197	1.58160117585132e-15	1.30604201437367e-14	15.8574188679817	6.31409941750042	6.34526791558433	2.67853832448683	0.00797187249203511	0.0208834946894623	-2.71276163127163	-5.10664175545763	6.34526791558433	-1.79946546916766	0.0733614749348343	0.119297124840726	-4.07907879720049	2.37206328938144	6.34526791558433	0.895283462017653	0.371646958179011	0.469120732822232	-4.86698554907529	19.5045639614322	6.34526791558433	7.59517496856725	9.58187771976987e-13	3.5939895447268e-11	11.3743167282728	6.58196772178	6.34526791558433	2.40781119851756	0.0169011715944721	0.0405174775860773	-3.27067563122565	17.3180346174418	6.34526791558433	7.12297646927874	1.60542809031788e-11	9.62079484192593e-11	10.1730934103621
440	SEPTIN7	-20.4922279839637	8.36062487855204	-9.25318217948586	2.38524287529465e-17	2.91529684758235e-16	23.6338659153379	-29.9781941071952	8.36062487855204	-12.2198236121489	2.28955295282955e-26	7.3990072825904e-25	37.4145764071356	-6.10628014036923	8.36062487855204	-2.63881372006723	0.00893476869169754	0.0229693828838247	-2.63948233184718	-6.50576665360394	8.36062487855204	-2.42559690104584	0.016116841824126	0.0321662021053737	-3.091915307137	3.96771122177497	8.36062487855204	1.50924616678556	0.13271894322777	0.201393382481189	-4.46240704064492	11.3848339524253	8.36062487855204	4.67997299988308	5.10229256816974e-06	4.86418558165516e-05	2.91917753246863	18.4552137301559	8.36062487855204	7.50760287730102	1.62842861608742e-12	3.80965713047855e-11	14.1925510884894	13.1451138820416	8.36062487855204	5.43429506695077	1.49924850217234e-07	5.58677617747609e-07	5.62267352305857
441	WDR4	34.1869232327443	3.8913899733698	11.5178651821273	3.56254130842257e-24	1.05858370307414e-22	23.6280805185451	40.4638977370098	3.8913899733698	13.2769861229551	1.05188103091609e-29	5.57107360818524e-28	28.8917457428499	-6.40988709024042	3.8913899733698	-1.61869778094853	0.106993188220925	0.185286417385314	-4.29934193054882	10.0597688639635	3.8913899733698	2.46915273613512	0.0143305816528524	0.0290790205152779	-3.53142590327881	-13.422708563072	3.8913899733698	-3.08361931820648	0.00231583940471043	0.00603627313508483	-2.91365137118394	-24.8292899522714	3.8913899733698	-4.85792626139753	2.29787818180612e-06	2.41837409382355e-05	-1.02635154893859	5.60667040866866	3.8913899733698	1.31422123021237	0.190186355335166	0.294734747363086	-4.50552062060501	-45.8288545117817	3.8913899733698	-9.15018452205582	4.73545626933177e-17	4.83693033224602e-16	6.56012531730706
442	MRPL12	16.8347471886824	7.35508790616548	9.27062242901208	2.12308872648724e-17	2.61443864704134e-16	23.5479615594011	22.4247237668697	7.35508790616548	12.0776156199457	6.39364202354289e-26	1.96621679433684e-24	37.910053757149	-5.8809005929047	7.35508790616548	-2.55022766315301	0.0114682328290493	0.028379100922415	-2.88768589201382	20.4734553732196	7.35508790616548	8.9786439277326	1.47334933829189e-16	6.76912306428083e-15	19.4180445376204	-5.81689788307493	7.35508790616548	-2.30846023341988	0.0219336117201508	0.0433348330275788	-3.34177048716005	-5.23155656492928	7.35508790616548	-1.99600989025691	0.0472074776171036	0.0979422459085355	-3.8144724191717	-5.81854976496358	7.35508790616548	-2.15714500811691	0.0321148590047696	0.0695821945103341	-3.59547356795996	-9.93705560993968	7.35508790616548	-3.95580151272808	0.000103892608010505	0.000249272532642656	0.134548426655749
443	PTGR1	-35.5579501988379	6.72127379200829	-10.2101808693848	3.55528112416805e-20	6.23810062277339e-19	23.5388648790334	-44.3976125096121	6.72127379200829	-11.7006831992341	9.62299947937145e-25	2.51915592778054e-23	28.0081905330475	62.4512187578154	6.72127379200829	23.4453284070691	6.76242463163008e-61	2.57873792619494e-57	88.8366145335517	-18.8631433261329	6.72127379200829	-4.50458275211048	1.09604494177639e-05	5.08053246917417e-05	0.998922131513137	-8.27136370613938	6.72127379200829	-2.00110635037126	0.0466511076672337	0.0829353025195266	-3.83280314984591	16.7889037452045	6.72127379200829	4.8303038882005	2.60449121786916e-06	2.698856841705e-05	2.64132654203574	11.2792679804907	6.72127379200829	2.92490925908673	0.00381883075126461	0.0115758939571985	-2.33282468505293	-16.1286962349933	6.72127379200829	-4.19368799312521	4.02680731894888e-05	0.000103637065756525	0.502443035888408
444	CASP3	29.4993546975136	6.15514694108271	9.71421944778596	1.06771091248143e-18	1.59459697634303e-17	23.511597447496	25.9452987299367	6.15514694108271	8.1341571259696	3.41288246401166e-14	2.42354906196731e-13	15.7028561008479	-24.300423505656	6.15514694108271	-5.79679651727543	2.41593382557579e-08	2.10657644547158e-07	4.61066941553725	16.0744950336506	6.15514694108271	4.01227599608369	8.32767344513872e-05	0.000308912400169867	-0.0694941008717667	36.3881433440161	6.15514694108271	9.75665167366146	7.99931004393056e-19	1.97650338882431e-17	20.4205879356652	-12.5305536847451	6.15514694108271	-2.6024354903851	0.00990699578095933	0.027582387864243	-3.11945234505258	-21.0661884255116	6.15514694108271	-4.49477885927653	1.14317057211724e-05	6.93050945682101e-05	0.519897160303061	31.7097518901704	6.15514694108271	8.6788510765457	1.04728693870684e-15	9.46363552828297e-15	16.3358725970482
445	CAPN2	-52.9007308989804	5.16559943828951	-12.5358719590517	2.32070041901556e-27	1.15429620841469e-25	23.5017577908572	-65.3575361255768	5.16559943828951	-13.7026545011536	4.68181058103526e-31	3.04317687767292e-29	22.9532601693969	21.8768348163547	5.16559943828951	6.7745174283077	1.20111770529416e-10	1.45559179539886e-09	8.51467434049506	-32.7433106161584	5.16559943828951	-6.56141763419019	3.98988848071211e-10	5.28902945762996e-09	3.84369332619757	-3.08053183333918	5.16559943828951	-0.750469303521477	0.453800951828863	0.550236660193131	-4.8513363034309	15.2977392803999	5.16559943828951	4.03796682732046	7.52455908164072e-05	0.000470387737125518	-0.365113096155582	0.312716446851071	5.16559943828951	0.0787298414959619	0.937321478498089	0.958663564109085	-5.02776331394225	-4.90007453187084	5.16559943828951	-1.18963681338664	0.235514557612071	0.295570725618252	-4.61058596526618
[truncated: 10,995 more rows]
[truncated: 120 more columns]
